# Supplementary material
Source: ML conference proceedings conference paper supplement (https://openreview.net/forum?id=FX0vR39SJ5q)
Supplement: supplementary_material [file attachment]

文部科学省次世代 I T 基盤構築のための研究開発  
「革新的シミュレーションソフトウェアの研究開発」

RSS21 フリーソフトウェア

# HEC ミドルウェア (HEC-MW)

PC クラスタ用ライブラリ型 HEC-MW

(hecmw-PC-cluster) バージョン 2.01

## API リファレンス

本ソフトウェアは文部科学省次世代IT基盤構築のための研究開発「革新的シミュレーションソフトウェアの研究開発」プロジェクトによる成果物です。本ソフトウェアを無償でご使用になる場合「RSS21フリーソフトウェア使用許諾条件」をご了承頂くことが前提となります。営利目的の場合には別途契約の締結が必要です。これらの契約で明示されていない事項に関して、或いは、これらの契約が存在しない状況においては、本ソフトウェアは著作権法など、関係法令により、保護されています。

お問い合わせ先

(公開／契約窓口) (財)生産技術研究奨励会

〒153-8505 東京都目黒区駒場4-6-1

(ソフトウェア管理元) 東京大学生産技術研究所 計算科学技術連携研究センター

〒153-8505 東京都目黒区駒場4-6-1

Fax : 03-5452-6662

E-mail : software@rss21.iis.u-tokyo.ac.jp

## 目 次

|                                                                |    |
|----------------------------------------------------------------|----|
| 1. I/O, 可視化 .....                                              | 1  |
| hecmw_init .....                                               | 2  |
| hecmw_finalize .....                                           | 3  |
| hecmw_get_mesh .....                                           | 4  |
| hecmw_dist_free .....                                          | 5  |
| hecmw_put_mesh .....                                           | 6  |
| hecmw_result_init .....                                        | 7  |
| hecmw_result_add .....                                         | 8  |
| hecmw_result_write .....                                       | 9  |
| hecmw_result_write_by_name .....                               | 10 |
| hecmw_result_write_st .....                                    | 11 |
| hecmw_result_write_st_by_name .....                            | 12 |
| hecmw_result_read .....                                        | 14 |
| hecmw_result_read_by_name .....                                | 15 |
| hecmw_restart_add_int .....                                    | 16 |
| hecmw_restart_add_real .....                                   | 17 |
| hecmw_restart_write .....                                      | 18 |
| hecmw_restart_write_by_name .....                              | 19 |
| hecmw_restart_open .....                                       | 20 |
| hecmw_restart_open_by_name .....                               | 21 |
| hecmw_restart_read_int .....                                   | 22 |
| hecmw_restart_read_real .....                                  | 23 |
| hecmw_restart_close .....                                      | 24 |
| hecmw_visualize_init .....                                     | 25 |
| hecmw_visualize(mesh, result, tstep, max_step, is_force) ..... | 26 |
| hecmw_visualize_finalize .....                                 | 27 |
| 2. 線形ソルバ .....                                                 | 29 |
| hecmw_solve_11 .....                                           | 30 |
| hecmw_solve_22 .....                                           | 31 |
| hecmw_solve_33 .....                                           | 32 |
| hecmw_solve_direct .....                                       | 33 |
| hecmw_solve_direct_parallel .....                              | 34 |
| hecmw_barrier .....                                            | 35 |

|                                          |    |
|------------------------------------------|----|
| hecmw_allREDUCE_R .....                  | 36 |
| hecmw_allREDUCE_I .....                  | 37 |
| hecmw_bcast_R .....                      | 38 |
| hecmw_bcast_I .....                      | 39 |
| hecmw_bcast_C .....                      | 40 |
| hecmw_update_1_R .....                   | 41 |
| hecmw_update_2_R .....                   | 42 |
| hecmw_update_3_R .....                   | 43 |
| hecmw_update_m_R .....                   | 44 |
| hecmw_matvec_11 .....                    | 45 |
| hecmw_matvec_22 .....                    | 46 |
| hecmw_matvec_33 .....                    | 47 |
| hecmw_innerProduct_I .....               | 48 |
| hecmw_innerProduct_R .....               | 49 |
| 3. 有限要素演算機能 .....                        | 50 |
| hecmw_mat_con .....                      | 51 |
| hecmw_mat_ass_elem .....                 | 52 |
| hecmw_mat_ass_equation .....             | 53 |
| hecmw_mat_ass_bc .....                   | 54 |
| hecmw_Jacob_231 .....                    | 55 |
| hecmw_Jacob_241 .....                    | 56 |
| hecmw_Jacob_341 .....                    | 57 |
| hecmw_Jacob_361 .....                    | 58 |
| 4. 適応格子機能 .....                          | 59 |
| hecmw_adapt_init .....                   | 60 |
| hecmw_adapt_proc .....                   | 61 |
| hecmw_adapt_new_mesh .....               | 62 |
| hecmw_adapt_edge_info .....              | 63 |
| 5. 動的負荷分散機能 .....                        | 64 |
| hecmw_transfer_data_f2c .....            | 65 |
| hecmw_adapt_dynamic_load_balancing ..... | 66 |
| hecmw_transfer_data_c2f .....            | 67 |
| 6. 連成カップリング機能 .....                      | 68 |
| hecmw_couple_get_mesh .....              | 69 |
| hecmw_couple_init .....                  | 70 |
| hecmw_couple_finalize .....              | 72 |

|                                            |    |
|--------------------------------------------|----|
| <b>hecmw_couple_startup</b> .....          | 73 |
| <b>hecmw_couple_cleanup</b> .....          | 74 |
| <b>hecmw_couple</b> .....                  | 75 |
| <b>hecmw_couple_is_member</b> .....        | 76 |
| <b>hecmw_couple_is_unit_member</b> .....   | 77 |
| <b>hecmw_couple_is_unit_member_u</b> ..... | 78 |
| <b>hecmw_couple_is_root</b> .....          | 79 |
| <b>hecmw_couple_is_unit_root</b> .....     | 80 |
| <b>hecmw_couple_is_unit_root_u</b> .....   | 81 |
| <b>hecmw_intercomm_get_size</b> .....      | 82 |
| <b>hecmw_intracomm_get_size</b> .....      | 83 |
| <b>hecmw_intracomm_get_size_u</b> .....    | 84 |
| <b>hecmw_intercomm_get_rank</b> .....      | 85 |
| <b>hecmw_intracomm_get_rank</b> .....      | 86 |
| <b>hecmw_intracomm_get_rank_u</b> .....    | 87 |
| <b>hecmw_intercomm_get_comm</b> .....      | 88 |
| <b>hecmw_intracomm_get_comm</b> .....      | 89 |
| <b>hecmw_intracomm_get_comm_u</b> .....    | 90 |
| <b>hecmw_intercomm_get_group</b> .....     | 91 |
| <b>hecmw_intracomm_get_group</b> .....     | 92 |
| <b>hecmw_intracomm_get_group_u</b> .....   | 93 |

## 1. I/O, 可視化

本節では、「I/O」「HEC-MW の初期化、終了処理」および「メモリ渡し可視化」に関する API について説明します。

## hecmw\_init

HEC-MW の初期化処理を行います。

```
subroutine hecmw_init()
```

### 引数

なし

### 説明

HEC-MW の初期化処理を行います。

これは、プログラムの開始直後に必ず呼び出さねばなりません。

MPI の初期化を行うため、この呼び出し以降、並列処理が可能となります。また、全体制御ファイルが自動的に読み込まれます。

## hecmw\_finalize

HEC-MW の終了処理を行います。

```
subroutine hecmw_finalize
```

### 引数

なし

### 説明

HEC-MW の終了処理を行います。

これは、プログラムの終了直前に呼び出さねばなりません。

MPI の終了処理はこの呼び出しで行われます。

## hecmw\_get\_mesh

メッシュデータをファイルから読み込みます。

```
subroutine hecmw_get_mesh(name_ID, mesh)

character(len=HECMW_NAME_LEN) :: name_ID
type(hecmwST_local_mesh) :: mesh
```

### 引数

name\_ID

!MESH または!MESH GROUP を特定する識別子

mesh

読み込まれたメッシュデータの格納先

### 説明

ファイルからメッシュデータを読み込みます。

この API は、全体制御ファイルから入力ファイルの情報を取得します。

読み込み可能なメッシュファイルの種類は以下のとおりです。

- HEC-MW 分散メッシュデータ
- HEC-MW 単一領域メッシュデータ
- GeoFEM メッシュデータ
- ABAQUS メッシュデータ

メッシュファイルの種類は全体制御ファイルで指定します。

読み込むメッシュファイルは、全体制御ファイルの!MESH で定義されており、かつ NAME が name\_ID のものです。!MESH GROUP によってメッシュファイルがグループ化されている場合は、グループ内の全てのメッシュファイルを読み込みます。

読み込まれるメッシュタイプが分散メッシュデータの場合、実際に読み込むファイルのファイル名は、全体制御ファイルから取得したファイル名の末尾に「.<ランク番号>」を付加したものとします。



## hecmw\_dist\_free

分散メッシュデータ構造体に確保されているメモリを解放します。

```
subroutine hecmw_dist_free(mesh)

type(hecmwST_local_mesh) :: mesh
```

### 引数

mesh

解放する分散メッシュデータ構造体

### 説明

分散メッシュデータ構造体に確保されているメモリを解放します。

## hecmw\_put\_mesh

メッシュデータをファイルに出力します。

```
subroutine hecmw_put_mesh(name_ID, mesh)

character(len=HECMW_NAME_LEN) :: name_ID
type(hecmwST_local_mesh) :: mesh
```

### 引数

name\_ID

!MESH を特定する識別子

mesh

出力するメッシュデータ

### 説明

メッシュデータをファイルに出力します。

出力対象となるメッシュデータは、引数 **mesh** に格納されているデータで、出力ファイルの種類は分散メッシュデータとなります。

出力されるファイルは、全体制御ファイルの**!MESH** で定義されており、かつ **NAME** が **name\_ID** のものです。

出力されるファイルのファイル名は、全体制御ファイルから取得したファイル名の末尾に「.<ランク番号>」を付加したものととなります。

## hecmw\_result\_init

結果ファイル出力の初期化処理を行います。

```
subroutine hecmw_result_init(nnode, nelelem, tstep, header)

integer(kind=kint) :: nnode
integer(kind=kint) :: nelelem
integer(kind=kint) :: tstep
character(len=HECMW_HEADER_LEN) :: header
```

### 引数

nnode

節点数

nelem

要素数

tstep

タイムステップ

header

ヘッダ

### 説明

結果ファイル出力の初期化処理を行います。

これにより、結果ファイル出力のために必要な情報を取得します。ただし、**header** は結果ファイルにコメントとして用いられるだけで、何ら影響を与えません。

## hecmw\_result\_add

結果ファイルに出力するデータを指定します。

```
subroutine hecmw_result_add(node_or_elem, n_dof, label, data)

integer(kind=kint) :: node_or_elem
integer(kind=kint) :: n_dof
character(len=HECMW_NAME_LEN) :: label
real(kind=kreal) :: data
```

### 引数

node\_or\_elem

指定する値が節点値なのか要素値なのかを示す

1:節点 2:要素

n\_dof

自由度数

label

ラベル

data

結果データ

### 説明

結果ファイルに出力するデータを指定します。

これは、複数回呼び出すことが可能です。この呼び出しによって指定されたデータの情報は、一旦 HEC-MW の内部に蓄えられます。蓄えられたデータは、hecmw\_result\_write または hecmw\_result\_write\_by\_name によって出力されます。

この呼び出し以前に、hecmw\_result\_init によって初期化が行われていなければなりません。

## hecmw\_result\_write

結果データをファイルへ出力します。

```
subroutine hecmw_result_write()
```

### 引数

なし

### 説明

結果データをファイルへ出力します。

出力されるデータは、hecmw\_result\_add で指定されたデータです。

出力されるファイルは、全体制御ファイルの!RESULT で定義されており、IO=OUT かつ全体制御ファイル内で最初に定義されているファイルです。

出力されるファイルのファイル名は、全体制御ファイルから取得したファイル名の末尾に「.<ランク番号>.<tstep>」を付加したものとなります。

## hecmw\_result\_write\_by\_name

結果データをファイルへ出力します。

```
subroutine hecmw_result_write_by_name(name_ID)

character(len=HECMW_NAME_LEN) :: name_ID
```

### 引数

name\_ID

!RESULT を特定する識別子

### 説明

結果データをファイルへ出力します。

出力ファイルは、全体制御ファイルで指定された!RESULT のうち、NAME が name\_ID のものです。この場合、!RESULT の IO パラメータは無視されます。

出力されるファイルのファイル名は、全体制御ファイルから取得したファイル名の末尾に「.<ランク番号>.<tstep>」を付加したものとなります。

ファイル名の取得方法以外は、hecmw\_result\_write と同等です。

## hecmw\_result\_write\_st

結果データをファイルへ出力します。

```
subroutine hecmw_result_write_st(result_data, n_node, n_elem, tstep,
header)

type(hecmwST_result_data)::result_data
integer(kind=kint)::n_node,n_elem,tstep
character(len=HECMW_HEADER_LEN)::header
```

### 引数

|             |           |
|-------------|-----------|
| result_data | 結果データ構造体  |
| n_node      | 節点数       |
| n_elem      | 要素数       |
| tstep       | タイムステップ   |
| header      | 結果ファイルヘッダ |

### 説明

結果データをファイルへ出力します。

出力されるデータは、**result\_data** で指定されたデータです。

出力されるファイルは、全体制御ファイルの**!RESULT** で定義されており、**IO=OUT** かつ全体制御ファイル内で最初に定義されているファイルです。

出力されるファイルのファイル名は、全体制御ファイルから取得したファイル名の末尾に「.<ランク番号>.<tstep>」を付加したものとなります。

## hecmw\_result\_write\_st\_by\_name

結果データをファイルへ出力します。

```
subroutine    hecmw_result_write_st_by_name(name_ID,    result_data,
n_node, n_elem, tstep, header)

character(len=HECMW_NAME_LEN) :: name_ID
type(hecmwST_result_data)::result_data
integer(kind=kint)::n_node,n_elem,tstep
character(len=HECMW_HEADER_LEN)::header
```

### 引数

|             |                  |
|-------------|------------------|
| name_ID     | !RESULT を特定する識別子 |
| result_data | 結果データ構造体         |
| n_node      | 節点数              |
| n_elem      | 要素数              |
| tstep       | タイムステップ          |
| header      | 結果ファイルヘッダ        |

### 説明

引数 **result\_data** の結果データをファイルへ出力します。

出力ファイルは、全体制御ファイルで指定された!RESULT のうち、NAME が **name\_ID** のものです。この場合、!RESULT の IO パラメータは無視されます。

出力されるファイルのファイル名は、全体制御ファイルから取得したファイル名の末尾に「.<ランク番号>.<tstep>」を付加したものとなります。



## hecmw\_result\_finalize

結果データ出力の後処理を行います。

```
subroutine hecmw_result_finalize()
```

### 引数

なし

### 説明

hecmw\_result\_add で指定された結果データの登録をクリアします。

## hecmw\_result\_read

結果ファイルから結果データを入力します。

```
subroutine hecmw_result_read(tstep, result)

integer(kind=kint) :: tstep
type(hecmwST_result_data) :: result
```

### 引数

tstep

タイムステップ

result

結果データ格納用構造体

### 説明

結果ファイル内の結果データが読み込まれ、**result** に格納されます。

入力されるファイルは、全体制御ファイルの**!RESULT** で定義されており、**IO=IN** かつ全体制御ファイル内で最初に定義されているファイルです。

入力されるファイルのファイル名は、全体制御ファイルから取得したファイル名の末尾に「.<ランク番号>.<tstep>」を付加したものとなります。

## hecmw\_result\_read\_by\_name

結果ファイルから結果データを入力します。

```
subroutine hecmw_result_read_by_name(name_ID, tstep, result)

character(len=HECMW_NAME_LEN) :: name_ID
integer(kind=kint) :: tstep
type(hecmwST_result_data) :: result
```

### 引数

|         |                  |
|---------|------------------|
| name_ID |                  |
|         | !RESULT を特定する識別子 |
| tstep   |                  |
|         | タイムステップ          |
| result  |                  |
|         | 結果データ格納用構造体      |

### 説明

結果ファイル内の結果データが読み込まれ、**result** に格納されます。

入力ファイルは、全体制御ファイルで指定された**!RESULT**のうち、**NAME**が **name\_ID** のものです。この場合、**!RESULT**の **IO** パラメータは無視されます。

ファイル名の取得方法以外は、**hecmw\_result\_read** と同等です。

## hecmw\_restart\_add\_int

リスタートファイルに出力するデータを指定します。

```
subroutine hecmw_restart_add_int(data, n_data)

integer(kind=kint),dimension(:) :: data
integer(kind=kint) :: n_data
```

### 引数

data

リスタートデータ（整数型一次元配列）

n\_data

配列要素数

### 説明

リスタートファイルに出力するデータを指定します。

これは、複数回呼び出すことが可能です。この呼び出しによって指定されたデータの情報は、一旦 HEC-MW の内部に蓄えられます。蓄えられたデータは、`hecmw_restart_write` または `hecmw_restart_write_by_name` によって出力されます。したがって、実際に出力が完了するまでデータを変更してはなりません。

## hecmw\_restart\_add\_real

リスタートファイルに出力するデータを指定します。

```
subroutine hecmw_restart_add_int(data, n_data)

integer(kind=kint),dimension(:) :: data
integer(kind=kint) :: n_data
```

### 引数

data

リスタートデータ（浮動小数点型一次元配列）

n\_data

配列要素数

### 説明

引数の型が浮動小数点型一次元配列であること以外は、hecmw\_restart\_add\_real と同等です。

## hecmw\_restart\_write

リスタートデータをファイルへ出力します。

```
subroutine hecmw_restart_write()
```

### 引数

なし

### 説明

リスタートデータをファイルへ出力します。

出力されるデータは、hecmw\_restart\_add\_int または hecmw\_restart\_real で指定されたデータです。

出力されるファイルは、全体制御ファイルの!RESTART で定義されており、IO=OUT または IO=INOUT、かつ全体制御ファイル内で最初に定義されているファイルです。

出力されるファイルのファイル名は、全体制御ファイルから取得したファイル名の末尾に「.<ランク番号>」を付加したものとなります。

## hecmw\_restart\_write\_by\_name

リスタートデータをファイルへ出力します。

```
subroutine hecmw_restart_write_by_name(name_ID)

character(len=HECMW_NAME_LEN) :: name_ID
```

### 引数

name\_ID

!RESTART を特定する識別子

### 説明

リスタートデータをファイルへ出力します。

出力ファイルは、全体制御ファイルで指定された!RESTART のうち、NAME が name\_ID のものです。この場合、!RESTART の IO パラメータは無視されます。

出力されるファイルのファイル名は、全体制御ファイルから取得したファイル名の末尾に「.<ランク番号>」を付加したものとなります。

ファイル名の取得方法以外は、hecmw\_restart\_write と同等です。

## hecmw\_restart\_open

リスタートファイルを入力用にオープンします。

```
hecmw_restart_open()
```

### 引数

なし

### 説明

リスタートファイルを入力用にオープンします。

オープンされるファイルは、全体制御ファイルの!**RESTART** で定義されており、**IO=IN** または **IO=INOUT**、かつ全体制御ファイル内で最初に定義されているファイルです。



## hecmw\_restart\_open\_by\_name

リスタートファイルを入力用にオープンします。

```
subroutine hecmw_restart_open_by_name(name_ID)

character(len=HECMW_NAME_LEN) :: name_ID
```

### 引数

name\_ID

!RESTART を特定する識別子

### 説明

リスタートファイルを入力用にオープンします。

出力ファイルは、全体制御ファイルで指定された!RESTART のうち、NAME が name\_ID のものです。この場合、!RESTART の IO パラメータは無視されます。

## hecmw\_restart\_read\_int

リスタートデータからデータを入力します。

```
subroutine hecmw_restart_read_int(dst)

integer(kind=kint), dimension(:) :: dst
```

### 引数

dst

リスタートデータ格納先（整数型一次元配列）

### 説明

リスタートファイル内のデータの一部分が読み込まれ、dst に格納されます。

この呼び出し以前に、hecmw\_restart\_open または hecmw\_restart\_open\_by\_name によって入力リスタートファイルがオープンされていなければなりません。

dst には、データ格納に必要な領域を事前に確保しておかなければなりません。

この呼び出しで注意すべきことは、リスタートファイルの入力と出力で整合性がとれていなければならないということです。

リスタートファイルの入力には hecmw\_restart\_write\_int または hecmw\_restart\_write\_real を使用しますが、その順番とそれぞれの出力で出力したデータサイズに入力時もある合わせる必要があります。つまり、hecmw\_restart\_write\_int で出力したデータは、hecmw\_restart\_read\_int で入力せねばならず、かつその配列の要素サイズを同じにしておかなければなりません。これは、hecmw\_restart\_write\_real, hecmw\_restart\_read\_real についても同じです。

## hecmw\_restart\_read\_real

リスタートデータからデータを入力します。

```
subroutine hecmw_restart_read_real(dst)

real(kind=kreal),dimension(:) :: dst
```

### 引数

dst

リスタートデータ格納先（浮動小数点型一次元配列）

### 説明

引数の型が浮動小数点型一次元配列であること以外は、hecmw\_restart\_read\_real と同等です。

## hecmw\_restart\_close

リスタートファイルをクローズします。

```
subroutine hecmw_restart_close()
```

### 引数

なし

### 説明

オープンされているリスタートファイルをクローズします。

## hecmw\_visualize\_init

可視化の初期化処理を行います。

```
subroutine hecmw_visualize_init()
```

### 引数

なし

### 説明

可視化の初期化処理を行います。

## hecmw\_visualize(mesh, result, timestep, max\_step, is\_force)

可視化を行います。

```
subroutine hecmw_visualize(mesh, result, timestep, max_step, is_force)

type(hecmwST_local_mesh) :: mesh
type(hecmwST_result_data) :: result
integer(kind=kint) :: timestep
integer(kind=kint) :: max_step
integer(kind=kint) :: is_force
```

### 引数

|          |                                       |
|----------|---------------------------------------|
| mesh     | メッシュデータ                               |
| result   | 可視化用結果データ                             |
| timestep | タイムステップ                               |
| max_step | 最大タイムステップ                             |
| is_force | 最後のステップも強制的に描くかどうかを示す。<br>0:描かない 1:描く |

### 説明

可視化を行います。

hecmw\_visualize\_init によって事前に初期化されている必要があります。

可視化に必要な結果データには **result**、メッシュには **mesh** が使用されます。

## hecmw\_visualize\_finalize

可視化の後処理を行います。

```
subroutine hecmw_visualize_finalize
```

### 引数

なし

### 説明

可視化の後処理を行います。

## hecmw\_ctrl\_get\_control\_file

制御ファイル名を取得します。

```
subroutine hecmw_ctrl_get_control_file(name_ID, filename)

character(len=HECMW_NAME_LEN) :: name_ID
character(len=HECMW_FILENAME_LEN) :: filename
```

### 引数

name\_ID

!CONTROL を特定する識別子

filename

制御ファイル名格納先

### 説明

全体制御ファイルの!CONTROL で定義した制御ファイル名を取得します。



## 2. 線形ソルバ

本節では「線形ソルバ」「マトリクス・ベクトル演算」および「領域間通信処理」に関するAPIについて説明します。

## hecmw\_solve\_11

線形ソルバ（1 節点あたり 1 自由度）を呼び出します。

```
subroutine hecmw_solve_11(mesh, matrix)

type(hecmwST_local_mesh) :: mesh
type(hecmwST_matrix      ) :: matrix
```

### 引数

mesh

メッシュデータの格納先

matrix

マトリクスデータおよびソルバ制御情報の格納先

### 説明

- 線形ソルバ（1 節点あたり 1 自由度）を呼び出します。
- 係数マトリクスに関する情報，右辺ベクトル，ソルバ制御情報は全て「matrix」に格納されています。
- 「matrix」の内容については，「2.2」をご覧ください。

## hecmw\_solve\_22

線形ソルバ（1 節点あたり 2 自由度）を呼び出します。

```
subroutine hecmw_solve_22(mesh, matrix)

type(hecmwST_local_mesh) :: mesh
type(hecmwST_matrix      ) :: matrix
```

### 引数

mesh

メッシュデータの格納先

matrix

マトリクスデータおよびソルバ制御情報の格納先

### 説明

- 線形ソルバ（1 節点あたり 2 自由度）を呼び出します。
- 係数マトリクスに関する情報，右辺ベクトル，ソルバ制御情報は全て「matrix」に格納されています。
- 「matrix」の内容については，「2.2」をご覧ください。

## hecmw\_solve\_33

線形ソルバ（1 節点あたり 3 自由度）を呼び出します。

```
subroutine hecmw_solve_33(mesh, matrix)

type(hecmwST_local_mesh) :: mesh
type(hecmwST_matrix      ) :: matrix
```

### 引数

mesh

メッシュデータの格納先

matrix

マトリクスデータおよびソルバ制御情報の格納先

### 説明

- 線形ソルバ（1 節点あたり 3 自由度）を呼び出します。
- 係数マトリクスに関する情報，右辺ベクトル，ソルバ制御情報は全て「matrix」に格納されています。
- 「matrix」の内容については，「2.2」をご覧ください。

## hecmw\_solve\_direct

直接法ソルバを呼び出します。

```
subroutine hecmw_solve_direct(mesh, matrix, ifmsg)

type(hecmwST_local_mesh) :: mesh
type(hecmwST_matrix      ) :: matrix
integer(kind=kint) :: ifmsg
```

### 引数

**mesh**  
メッシュデータの格納先

**matrix**  
マトリクスデータおよびソルバ制御情報の格納先

**ifmsg**  
エラー時のメッセージを出力するデバイス番号

### 説明

- 直接法を呼び出します。
- 係数マトリクスに関する情報、右辺ベクトル、ソルバ制御情報は全て「matrix」に格納されています。
- 「matrix」の内容については、「2.2」をご覧ください。

### 注

本バージョンでは並列実行時には機能いたしません。

## hecmw\_solve\_direct\_parallel

並列直接法ソルバを呼び出します。

```
subroutine hecmw_solve_direct_parallel(mesh, matrix, ifmsg)

type(hecmwST_local_mesh) :: mesh
type(hecmwST_matrix      ) :: matrix
integer(kind=kint) :: ifmsg
```

### 引数

mesh

メッシュデータの格納先

matrix

マトリクスデータおよびソルバ制御情報の格納先

ifmsg

エラー時のメッセージを出力するデバイス番号

### 説明

- 並列直接法を呼び出します。
- 係数マトリクスに関する情報，右辺ベクトル，ソルバ制御情報は全て「matrix」に格納されています。
- 「matrix」の内容については，「2.2」をご覧ください。

## hecmw\_barrier

MPI プロセスの同期のための **Barrier** を設定します。

```
subroutine hecmw_barrier(mesh)

type(hecmwST_local_mesh) :: mesh
```

### 引数

mesh

対象とするコミュニケーショングループのメッシュデータの格納先

### 説明

- 内部からは、**MPI\_BARRIER** を呼び出しています。

## hecmw\_allREDUCE\_R

実数値または実数ベクトルの各成分に関してグローバルな演算を実施します。

```
subroutine hecmw_allREDUCE_R(mesh, VAL, m, FLAG)

type(hecmwST_local_mesh) :: mesh
integer(kind=kint) :: m, FLAG

real(kind=kreal) :: VAL
    or
real(kind=kreal), dimension(m) :: VAL
```

### 引数

mesh

対象とするコミュニケーショングループのメッシュデータの格納先

VAL

対象とする実数ベクトル（またはスカラー）

m

ベクトルのサイズ（スカラーの場合は 1）

FLAG

グローバル演算の識別子

|           |     |
|-----------|-----|
| hecmw_sum | 総 和 |
|-----------|-----|

|           |     |
|-----------|-----|
| hecmw_min | 最小値 |
|-----------|-----|

|           |     |
|-----------|-----|
| hecmw_max | 最大値 |
|-----------|-----|

### 説明

- 内部からは、MPI\_ALLREDUCE を呼び出しています。



## hecmw\_allREDUCE\_I

整数値または整数ベクトルの各成分に関してグローバルな演算を実施します。

```
subroutine hecmw_allREDUCE_I(mesh, VAL, m, FLAG)

type(hecmwST_local_mesh) :: mesh
integer(kind=kint) :: m, FLAG

integer(kind=kint) :: VAL
    or
integer(kind=kint), dimension(m) :: VAL
```

### 引数

mesh

対象とするコミュニケーショングループのメッシュデータの格納先

VAL

対象とする整数ベクトル（またはスカラー）

m

ベクトルのサイズ（スカラーの場合は 1）

FLAG

グローバル演算の識別子

|           |     |
|-----------|-----|
| hecmw_sum | 総 和 |
|-----------|-----|

|           |     |
|-----------|-----|
| hecmw_min | 最小値 |
|-----------|-----|

|           |     |
|-----------|-----|
| hecmw_max | 最大値 |
|-----------|-----|

### 説明

- 内部からは、MPI\_ALLREDUCE を呼び出しています。

## hecmw\_bcast\_R

実数値または実数ベクトル値を全プロセッサに送信します。

```
subroutine hecmw_bcast_R(mesh, VAL, m, nbase)

type(hecmwST_local_mesh) :: mesh
integer(kind=kint) :: m, nbase

real(kind=kreal) :: VAL
    or
real(kind=kreal), dimension(m) :: VAL
```

### 引数

mesh

対象とするコミュニケーショングループのメッシュデータの格納先

VAL

対象とする実数ベクトル（またはスカラー）

m

ベクトルのサイズ（スカラーの場合は 1）

nbase

発信元の PE のプロセス ID（0 から開始）

### 説明

- 内部からは、MPI\_BCAST を呼び出しています。

## hecmw\_bcast\_I

整数値または整数ベクトル値を全プロセッサに送信します。

```
subroutine hecmw_bcast_I(mesh, VAL, m, nbase)

type(hecmwST_local_mesh) :: mesh
integer(kind=kint) :: m, nbase

integer(kind=kint) :: VAL
    or
integer(kind=kint) , dimension(m) :: VAL
```

### 引数

mesh

対象とするコミュニケーショングループのメッシュデータの格納先

VAL

対象とする整数ベクトル（またはスカラー）

m

ベクトルのサイズ（スカラーの場合は 1）

nbase

発信元の PE のプロセス ID（0 から開始）

### 説明

- 内部からは、MPI\_BCAST を呼び出しています。

## hecmw\_bcast\_C

Character 変数値または Character 変数ベクトル値を全プロセッサに送信します。

```
subroutine hecmw_bcast_I(mesh, VAL, m, LEN, nbase)

type(hecmwST_local_mesh) :: mesh
integer(kind=kint) :: m, length, nbase

character (length=LEN) :: VAL
    or
character (length=LEN), dimension(m) :: VAL
```

### 引数

mesh

対象とするコミュニケーショングループのメッシュデータの格納先

VAL

対象とする Character 変数ベクトル（またはスカラー）

m

ベクトルのサイズ（スカラーの場合は 1）

LEN

Character 変数の文字長

nbase

発信元の PE のプロセス ID（0 から開始）

### 説明

- 内部からは、MPI\_BCAST を呼び出しています。

## hecmw\_update\_1\_R

オーバーラップ領域における実数ベクトル（1 節点あたり 1 自由度）の値を，領域間通信によって更新します。

```
subroutine hecmw_update_1_R (mesh, VAL, N)

type(hecmwST_local_mesh) :: mesh
integer(kind=kint) :: N
real(kind=kreal), dimension(N) :: VAL
```

### 引数

mesh

メッシュデータの格納先

VAL

実数ベクトル値

N

ベクトルのサイズ

### 説明

## hecmw\_update\_2\_R

オーバーラップ領域における実数ベクトル（1 節点あたり 2 自由度）の値を，領域間通信によって更新します。

```
subroutine hecmw_update_2_R(mesh, VAL, N)

type(hecmwST_local_mesh) :: mesh
integer(kind=kint) :: N
real(kind=kreal), dimension(2*N) :: VAL
```

### 引数

mesh

メッシュデータの格納先

VAL

実数ベクトル値

N

ベクトルのサイズ

### 説明

## hecmw\_update\_3\_R

オーバーラップ領域における実数ベクトル（1 節点あたり 3 自由度）の値を，領域間通信によって更新します。

```
subroutine hecmw_update_3_R(mesh, VAL, N)

type(hecmwST_local_mesh) :: mesh
integer(kind=kint) :: N
real(kind=kreal), dimension(3*N) :: VAL
```

### 引数

mesh

メッシュデータの格納先

VAL

実数ベクトル値

N

ベクトルのサイズ

### 説明

## hecmw\_update\_m\_R

オーバーラップ領域における実数ベクトル（1 節点あたり  $m$  自由度）の値を，領域間通信によって更新します。

```
subroutine hecmw_update_2_R(mesh, VAL, N, m)

type(hecmwST_local_mesh) :: mesh
integer(kind=kint) :: N, m
real(kind=kreal), dimension(2*N) :: VAL
```

### 引数

mesh

メッシュデータの格納先

VAL

実数ベクトル値

N

ベクトルのサイズ

m

節点あたりの自由度数

### 説明



## hecmw\_matvec\_11

実数ベクトル（1 節点あたり 1 自由度）の行列ベクトル積を求めます。

```
subroutine hecmw_matvec_11 (mesh, matrix, X, Y, N)

type(hecmwST_local_mesh) :: mesh
type(hecmwST_matrix)      :: matrix
integer(kind=kint) :: N
real(kind=kreal), dimension(N) :: X, Y
```

### 引数

mesh

メッシュデータの格納先

matrix

マトリクスデータの格納先

X

行列を乗じるベクトル

Y

行列ベクトル積の結果ベクトル

N

ベクトルのサイズ

### 説明

- 係数マトリクスに関する情報，は全て「matrix」に格納されています。
- 内部から「hecmw\_update\_1\_R」を呼び出しています。

## hecmw\_matvec\_22

実数ベクトル（1 節点あたり 2 自由度）の行列ベクトル積を求めます。

```
subroutine hecmw_matvec_22 (mesh, matrix, X, Y, N)

type(hecmwST_local_mesh) :: mesh
type(hecmwST_matrix)      :: matrix
integer(kind=kint) :: N
real(kind=kreal), dimension(2*N) :: X, Y
```

### 引数

mesh

メッシュデータの格納先

matrix

マトリクスデータの格納先

X

行列を乗じるベクトル

Y

行列ベクトル積の結果ベクトル

N

ベクトルのサイズ

### 説明

- 係数マトリクスに関する情報，は全て「matrix」に格納されています。
- 内部から「hecmw\_update\_2\_R」を呼び出しています。

## hecmw\_matvec\_33

実数ベクトル（1 節点あたり 3 自由度）の行列ベクトル積を求めます。

```
subroutine hecmw_matvec_33 (mesh, matrix, X, Y, N)

type(hecmwST_local_mesh) :: mesh
type(hecmwST_matrix)      :: matrix
integer(kind=kint) :: N
real(kind=kreal), dimension(3*N) :: X, Y
```

### 引数

mesh

メッシュデータの格納先

matrix

マトリクスデータの格納先

X

行列を乗じるベクトル

Y

行列ベクトル積の結果ベクトル

N

ベクトルのサイズ

### 説明

- 係数マトリクスに関する情報，は全て「matrix」に格納されています。
- 内部から「hecmw\_update\_3\_R」を呼び出しています。

## hecmw\_innerProduct\_I

整数ベクトルの内積を求めます。

```
subroutine hecmw_innerProduct_I (mesh, vec, dof, sum)

type(hecmwST_local_mesh) :: mesh
integer(kind=kint),pointer :: vec(:)
integer(kind=kint) :: dof, sum
```

### 引数

mesh

メッシュデータの格納先

vec

ベクトルデータの格納先

dof

ベクトルの自由度

sum

内積の値

### 説明

- ベクトルの長さは mesh に格納された情報と自由度から自動的に計算されます。
- 内部から「hecmw\_allreduce\_I1」を呼び出しています。

## hecmw\_innerProduct\_R

実数ベクトルの内積を求めます。

```
subroutine hecmw_innerProduct_R (mesh, vec, dof, sum)

type(hecmwST_local_mesh) :: mesh
real(kind=kint),pointer :: vec(:)
integer(kind=kint) :: dof
real(kind=kint) :: sum
```

### 引数

mesh

メッシュデータの格納先

vec

ベクトルデータの格納先

dof

ベクトルの自由度

sum

内積の値

### 説明

- ベクトルの長さは mesh に格納された情報と自由度から自動的に計算されます。
- 内部から「hecmw\_allreduce\_R1」を呼び出しています。

### 3. 有限要素演算機能

- 「有限要素演算機能」で使用する，サブルーチンおよび API について説明します。

## hecmw\_mat\_con

係数行列の CRS テーブルを作ります。

```
subroutine hecmw_mat_con (mesh, matrix)

type(hecmwST_local_mesh) :: mesh
type(hecmwST_matrix)      :: matrix
```

### 引数

mesh

メッシュデータの格納先

matrix

マトリクスデータの格納先

### 説明

- 全体化された係数行列の圧縮格納用データテーブルを作ります。
- 生成されたテーブルデータは、**matrix** 構造体に格納されます。
- CRS フォーマットに関しては HEC ミドルウェアの線形ソルバを参照してください。
- 内部から「hecmw\_mat\_con0」および「hecmw\_mat\_con1」を呼び出しています。

## hecmw\_mat\_ass\_elem

要素行列を全体行列に足しこみます。

```
subroutine hecmw_mat_ass_elem (hecMAT, nn, nodLOCAL, matrix)

type(hecmwST_matrix)      :: hecMAT
integer(kind=kint) :: nn
integer(kind=kint) :: nodLOCAL(:)
real(kind=kreal) :: matrix(:, :)
```

### 引数

hecMAT

マトリクスデータ (CRS テーブル) の格納先

nn

要素の節点数

nodLOCAL

要素を構成する節点

matrix

要素行列

### 説明

- 要素行列を全体行列に足しこみます。
- 要素行列は、一辺が節点数×節点自由度数の正方行列 (2 次元配列) として与えます。



## hecmw\_mat\_ass\_equation

全体行列に多点拘束の条件式をくみこみます。

```
subroutine hecmw_mat_ass_equation (hecMESH, hecMAT)

type(hecmwST_mesh)      :: hecMESH
type(hecmwST_matrix)    :: hecMAT
```

### 引数

hecMESH

メッシュデータの格納先

hecMAT

マトリクスデータ (CRS テーブル) の格納先

### 説明

- メッシュデータ内に定義されている多点拘束の条件式をくみこみます。
- 用いるペナルティ値は hecMAT%rarray(11) に予めセットしておきます。

## hecmw\_mat\_ass\_bc

全体行列に拘束条件をくみこみます。

```
subroutine hecmw_mat_ass_bc (hecMAT, inode, idof, RHS)

type(hecmwST_matrix)      :: hecMAT
integer(kind=kint) :: inode
integer(kind=kint) :: idof
real(kind=kreal) :: RHS
```

### 引数

hecMAT

マトリクスデータ (CRS テーブル) の格納先

inode

拘束される節点

idof

拘束される自由度

RHS

拘束する値

### 説明

- 指定した節点の指定した自由度を指定した値に拘束します。

## hecmw\_Jacob\_231

要素タイプ 231 に関するガウス積分の重み、形状関数、形状関数の微係数の演算。

```
subroutine hecmw_Jacob_231 (mesh, iElem, DET, w, N, NX, NY)

type(hecmwST_local_mesh) :: mesh
integer(kind=kint) :: iElem
real(kind=kreal) :: DET
real(kind=kreal) :: w(3), N(3,3), NX(3,3), NY(3,3)
```

### 引数

mesh

メッシュデータの格納先

iElem

要素番号

DET

ヤコビアン値

w

各積分点における重みの値

N

各積分点における形状関数の値

NX

各積分点における形状関数の X 方向微係数の値

NY

各積分点における形状関数の Y 方向微係数の値

### 説明

- ガウス積分の次数は 2、積分点数は 3 です。
- w および N、NX、NY の第 1 引数が積分点番号、第 2 引数が要素内節点番号です。

## hecmw\_Jacob\_241

要素タイプ 241 に関するガウス積分の重み、形状関数、形状関数の微係数の演算。

```
subroutine hecmw_Jacob_241 (mesh, iElem, DET, w, N, NX, NY)

type(hecmwST_local_mesh) :: mesh
integer(kind=kint) :: iElem
real(kind=kreal) :: DET
real(kind=kreal) :: w(4), N(4,4), NX(4,4), NY(4,4)
```

### 引数

mesh

メッシュデータの格納先

iElem

要素番号

DET

ヤコビアン値

w

各積分点における重みの値

N

各積分点における形状関数の値

NX

各積分点における形状関数の X 方向微係数の値

NY

各積分点における形状関数の Y 方向微係数の値

### 説明

- ガウス積分の次数は 2、積分点数は 4 です。
- w および N、NX、NY の第 1 引数が積分点番号、第 2 引数が要素内節点番号です。

## hecmw\_Jacob\_341

要素タイプ 341 に関するガウス積分の重み、形状関数、形状関数の微係数の演算。

```
subroutine hecmw_Jacob_341 (mesh, iElem, DET, w, N, NX, NY, NZ)

type(hecmwST_local_mesh) :: mesh
integer(kind=kint) :: iElem
real(kind=kreal) :: DET
real(kind=kreal) :: w(4), N(4,4), NX(4,4), NY(4,4), NZ(4,4)
```

### 引数

mesh

メッシュデータの格納先

iElem

要素番号

DET

ヤコビアン値

w

各積分点における重みの値

N

各積分点における形状関数の値

NX

各積分点における形状関数の X 方向微係数の値

NY

各積分点における形状関数の Y 方向微係数の値

NZ

各積分点における形状関数の Z 方向微係数の値

### 説明

- ガウス積分の次数は 2、積分点数は 4 です。
- w および N、NX、NY の第 1 引数が積分点番号、第 2 引数が要素内節点番号です。

## hecmw\_Jacob\_361

要素タイプ 361 に関するガウス積分の重み、形状関数、形状関数の微係数の演算。

```
subroutine hecmw_Jacob_361 (mesh, iElem, DET, w, N, NX, NY, NZ)

type(hecmwST_local_mesh) :: mesh
integer(kind=kint) :: iElem
real(kind=kreal) :: DET
real(kind=kreal) :: w(8), N(8,8), NX(8,8), NY(8,8), NZ(8,8)
```

### 引数

mesh

メッシュデータの格納先

iElem

要素番号

DET

ヤコビアン値

w

各積分点における重みの値

N

各積分点における形状関数の値

NX

各積分点における形状関数の X 方向微係数の値

NY

各積分点における形状関数の Y 方向微係数の値

NZ

各積分点における形状関数の Z 方向微係数の値

### 説明

- ガウス積分の次数は 2、積分点数は 8 です。

w および N、NX、NY の第 1 引数が積分点番号、第 2 引数が要素内節点番号です。

## 4. 適応格子機能

「適応格子機能」で使用する，サブルーチンおよび API について説明します。「HEC-MW」でサポートしている適応格子機能を利用する場合には，以下のサブルーチンをこの順番に呼び出す必要があります。

- `hecmw_adapt_init` 「適応格子機能」初期化
- `hecmw_adapt_proc` 「適応格子機能」実施
- `hecmw_adapt_new_mesh` 新規メッシュ構造体格納

また，辺情報を取得するために以下のサブルーチンを使用します。

- `hecmw_adapt_edge_info` 辺情報取得

## hecmw\_adapt\_init

「適応格子機能」を初期化します

```
subroutine hecmw_adapt_init(hecMESH)

type(hecmwST_local_mesh) :: hecMESH
```

### 引 数

hecMESH          メッシュデータの格納先（構造体）

### 説 明

- 辺情報の生成，通信テーブル（辺，要素）を実施します。
- このサブルーチンを呼ぶ前に，「hecmw\_get\_mesh」等により，メッシュデータ構造体に分散メッシュ情報を格納しておく必要があります。



## hecmw\_adapt\_proc

「適応格子機能」を実施します

```
subroutine hecmw_adapt_proc(hecMESH)

type(hecmwST_local_mesh) :: hecMESH
```

### 引 数

hecMESH          メッシュデータの格納先（構造体）

### 説 明

- 分割辺設定，節点・要素・グループ情報の更新を実施します。
- 通信テーブルの再構成を実施します。
- このサブルーチンを呼び出す前に，hecMESH%adapt\_iemb（辺分割の情報，分割する辺については hecMESH%adapt\_iemb(edge)=1，分割しない場合には hecMESH%adapt\_iemb(edge)=0）の値を入れておく必要があります。

## hecmw\_adapt\_new\_mesh

新規メッシュデータ構造体へのメッシュ情報の格納を行います

```
subroutine hecmw_adapt_new_mesh(hecMESH, hecMESHnew)

type(hecmwST_local_mesh) :: hecMESH
type(hecmwST_local_mesh) :: hecMESHnew
```

### 引 数

|            |                    |
|------------|--------------------|
| hecMESH    | メッシュデータの格納先（構造体）   |
| hecMESHnew | 新規メッシュデータの格納先（構造体） |

### 説 明

## hecmw\_adapt\_edge\_info

辺情報を取得します。

```
subroutine hecmw_adapt_edge_info (hecMESH, nod1, nod2, edge, FLAG)

type(hecmwST_local_mesh) :: hecMESH
integer :: nod1, nod2, edge, FLAG
```

### 引 数

|         |                  |
|---------|------------------|
| hecMESH | メッシュデータの格納先（構造体） |
| nod1    | 第1点の節点番号         |
| nod2    | 第2点の節点番号         |
| edge    | 辺番号              |
| FLAG    | フラグ（通常は1とする）     |

### 説 明

- FLAG=0 の場合は新規辺生成, FLAG=1 の場合は既存辺番号取得, FLAG=2 の場合は辺情報クリアですが、ユーザーが利用する場合は「FLAG=1」となります。

## 5. 動的負荷分散機能

「動的負荷分散機能」で使用する，サブルーチンおよび API について説明します。  
「HEC-MW」でサポートしている動的負荷分散機能を利用する場合には，以下のサブルーチンをこの順番に呼び出す必要があります。

- `hecmw_transfer_data_f2c`  
負荷バランスのとれていないメッシュデータとその結果データを Fortran 領域から C 領域へ転送します。
- `hecmw_dynamic_load_balancing`  
メッシュデータを際領域分割することで、負荷バランスのとれたメッシュデータとその結果データを作成します。
- `hecmw_transfer_data_c2f`  
負荷バランスのとれたメッシュデータとその結果データを C 領域から Fortran 領域へ転送します。

## hecmw\_transfer\_data\_f2c

負荷バランスのとれていないメッシュデータとその結果データを Fortran 領域から C 領域へ転送します。

```
subroutine hecmw_transfer_data_f2c(hecMESH, adapRES)

type(hecmwST_local_mesh) :: hecMESH
type(hecmwST_result_data):: adapRES
```

### 引 数

|          |                      |
|----------|----------------------|
| hecMESH: | 負荷バランスのとれていないメッシュデータ |
| adapRES: | 負荷バランスのとれていない結果データ   |

## hecmw\_adapt\_dynamic\_load\_balancing

メッシュデータを際領域分割することで、負荷バランスのとれたメッシュデータとその結果データを作成します。

```
subroutine hecmw_adapt_dynamic_load_balancing()
```

### 引 数

## hecmw\_transfer\_data\_c2f

負荷バランスのとれたメッシュデータとその結果データを C 領域から Fortran 領域へ転送します。

```
subroutine hecmw_transfer_data_c2f(hecMESH, adapRES)

type(hecmwST_local_mesh) :: hecMESH
type(hecmwST_result_data):: adapRES
```

### 引 数

|          |                   |
|----------|-------------------|
| hecMESH: | 負荷バランスのとれたメッシュデータ |
| adapRES: | 負荷バランスのとれた結果データ   |

## 6. 連成カップリング機能

本節では、「連成カップリング機能」に関する API について説明します。



## hecmw\_couple\_get\_mesh

メッシュデータをファイルから読み込みます。

```
subroutine hecmw_couple(name_ID, unit_ID)

character(len=HECMW_NAME_LEN) :: name_ID
character(len=HECMW_NAME_LEN) :: unit_ID
```

### 引数

name\_ID

!MESH または!MESH GROUP を特定する識別 ID

unit\_ID

!COUPLE UNIT を特定する識別 ID

### 説明

ファイルからメッシュデータを読み込みます。

メッシュデータの入力には、通常 `hecmw_get_mesh()` というサブルーチンを使用しますが、連成カップリング機能を利用する際には、本サブルーチンによってメッシュデータを入力しなくてはなりません。ここで読み込まれるメッシュファイルは、全体制御ファイルに記述された!MESH もしくは!MESH GROUP セクションのうち、NAME パラメータが `name_ID` であるものとなります。読み込み可能なメッシュファイルの種類などは、サブルーチン `hecmw_get_mesh` に準じますので、詳細は「I/O, 全体制御 プログラム使用説明書」を参照してください。

取得したメッシュデータは、全体制御ファイルに記述された!COUPLE UNIT セクションのうち、NAME パラメータが `unit_ID` の連成ユニットに割り当てられます。

なお、`name_ID` を NAME パラメータにもつ!MESH もしくは!MESH GROUP セクションが全体制御ファイルで定義されていない場合、および、`unit_ID` を NAME パラメータにもつ!COUPLE UNIT セクションが全体制御ファイルで定義されていない場合には、エラーとなります。

## hecmw\_couple\_init

連成情報を作成します。

```
subroutine hecmw_couple_init(boundary_id, mesh_unit1, mesh_unit2)

character(len=HECMW_NAME_LEN) :: boundary_id
type(hecmwST_local_mesh) :: mesh_unit1, mesh_unit2
```

### 引数

boundary\_id

!COUPLE BOUNDARY を特定する識別 ID

mesh\_unit1

連成ユニット 1 のメッシュデータ

mesh\_unit2

連成ユニット 2 のメッシュデータ

### 説明

連成する 2 つの連成ユニットの境界部でのマッピング処理などを行い、連成情報を作成します。

ここでは、全体制御ファイルに記述された!COUPLE BOUNDARY セクションのうち、NAME パラメータが boundary\_id であるセクションの連成情報が作成されます。連成情報の制御データとしては、該当する!COUPLE BOUNDARY セクションの COUPLE パラメータに与えられた連成情報識別 ID を NAME パラメータにもつ!COUPLE セクションのものが使用されます。連成される 2 つの連成ユニットは、この!COUPLE セクションの UNIT1 および UNIT2 パラメータに指定された連成ユニット情報識別 ID を NAME パラメータにもつ!COUPLE UNIT セクションのものとなり、UNIT1 パラメータに指定された連成ユニットが連成ユニット 1 に、UNIT2 パラメータに指定された連成ユニットが連成ユニット 2 になります。

第 2 引数と第 3 引数には、連成させる 2 つの連成ユニットに割り当てられたメッシュデータを渡しますが、第 2 引数には連成ユニット 1 のものを、第 3 引数には連成ユニット 2 のものを渡してください。なお、このサブルーチンを呼び出す MPI プロセスが連成ユニッ

ト 1 もしくは 2 のどちらか，またはどちらにも割り当てられていない場合にも，空の `hecmwST_local_mesh` 型の変数を引数で渡す必要があります。

`boundary_ID` に該当する `!COUPLE BOUNDARY` セクションが全体制御ファイルで定義されていない場合には、エラーとなります。

## hecmw\_couple\_finalize

連成情報を破棄します。

```
subroutine hecmw_finalize(boundary_id)

character(len=HECMW_NAME_LEN) :: boundary_id
```

### 引数

boundary\_id

!COUPLE BOUNDARY を特定する識別 ID

### 説明

サブルーチン hecmw\_couple\_init で作成した連成情報を破棄します。

ここ破棄される連成情報は、hecmw\_couple\_init の呼び出しによって作成された情報のうち、その第 1 引数に boundary\_id が与えられて作成された情報になります。

boundary\_id に対する連成情報が hecmw\_couple\_init によって作成されていない場合には、エラーとなります。

## hecmw\_couple\_startup

連成させる値についての情報を提供します。

```
subroutine hecmw_dist_free(boundary_id, couple_value)

character(len=HECMW_NAME_LEN) :: boundary_id
type(hecmw_couple_value) :: couple_value
```

### 引数

boundary\_id

!COUPLE BOUNDARY を特定する識別 ID

couple\_value

連成値情報

### 説明

連成値情報の一部を提供します。

本 API は構造体 `hecmw_couple_value` 型の変数を作成し、`boundary_id` によって特定される連成情報に従って、以下の 3 つのメンバに値を代入します。

`couple_value%n`

`couple_value%item_type`

`couple_value%item`

連成を実行する際には、この情報を元に

`couple_value%n_dof`

`couple_value%value`

に値を代入し、`hecmw_couple` の引数へと渡すことになります。

本 API を呼び出す前に `boundary_id` を第 1 引数に与えて `hecmw_couple_init` を呼び出し、連成情報を作成しておく必要があります。

## hecmw\_couple\_cleanup

連成値情報を破棄します。

```
subroutine hecmw_couple_cleanup(couple_value)

type(hecmw_couple_value) :: couple_value
```

### 引数

couple\_value

破棄する連成値情報

### 説明

連成値情報の構造体のメンバに割り当てられたメモリ領域を開放し，連成値情報を破棄します。

## hecmw\_couple

連成を実行します。

```
subroutine hecmw_couple(boundary_id, couple_value)

character(len=HECMW_NAME_LEN) :: boundary_id
type(hecmw_couple_value) :: couple_value
```

### 引数

boundary\_id

!COUPLE BOUNDARY を特定する識別 ID

couple\_value

連成境界値

### 説明

連成を実行し、連成ユニット間でのデータの補間処理を行いません。

連成の実行に際しては、第 1 引数に boundary\_id を与えられて呼び出された hecmw\_couple\_init が作成した連成情報が用いられます。

第 2 引数の couple\_value は送受信兼用になっています。送信側の連成ユニットのメンバプロセスは couple\_value の構造体のメンバ全てに値を代入した上で、本サブルーチンの引数に渡さなければなりません。一方、受信側の連成ユニットのメンバプロセスは、連成の実行によって得られたデータを couple\_value に受けることになります。そのため、連成タイプが Max(M,N)タイプの場合など、一つの MPI プロセスが送信側、受信側の両方の連成ユニットのメンバプロセスとなる場合には、本サブルーチンを呼び出す際に couple\_value に代入された値は全て破棄され、受信用に使用されることに注意してください。

## hecmw\_couple\_is\_member

連成のメンバプロセスであるか否かのフラグを提供します。

```
function hecmw_couple_is_member(boundary_id), result(is_member)

character(len=HECMW_NAME_LEN) :: boundary_id
integer(kind=kint) :: is_member
```

### 引数

boundary\_id

!COUPLE BOUNDARY を特定する識別 ID

### 説明

連成プロセスのメンバプロセスであるか否かのフラグを提供する関数です。

本関数を呼び出した MPI プロセスが、全体制御ファイルの!COUPLE BOUNDARY セクションのうち、NAME オプションが boundary\_id であるセクションのメンバプロセスである場合には「1」が、メンバプロセスでない場合には「0」が返されます。ここで、メンバプロセスとなるのは、該当する!COUPLE BOUNDARY セクションの COUPLE パラメータで特定される!COUPLE セクションの、UNIT1 および UNIT2 パラメータで指定された連成ユニットに割り当てられたプロセスとなります。

全体制御ファイルに boundary\_id で特定される!COUPLE BOUNDARY セクションが無い場合には、エラーとなります。



## hecmw\_couple\_is\_unit\_member

連成ユニットのメンバプロセスであるか否かのフラグを提供します。

```
function hecmw_couple_is_unit_member(boundary_id, unit_specifier),  
    result(is_member)  
  
character(len=HECMW_NAME_LEN) :: boundary_id  
integer(kind=kint) :: unit_specifier  
integer(kind=kint) :: is_member
```

### 引数

boundary\_id

!COUPLE BOUNDARY を特定する識別 ID

unit\_specifier

連成ユニット指定子

### 説明

連成ユニットのメンバプロセスであるか否かのフラグを提供する関数です。

本関数を呼び出した MPI プロセスが、全体制御ファイルの!COUPLE BOUNDARY セクションのうち、NAME オプションが boundary\_id であるセクションの、unit\_specifier で指定される連成ユニットのメンバプロセスである場合には「1」が、メンバプロセスでない場合には「0」が返されます。該当する!COUPLE BOUNDARY セクションの、連成ユニット 1 側のメンバプロセスを対象とする場合には unit\_specifier に HECMW\_COUPLE\_UNIT1 を、連成ユニット 2 側のメンバプロセスを対象とする場合には unit\_specifier に HECMW\_COUPLE\_UNIT2 を指定します。

全体制御ファイルに boundary\_id で特定される!COUPLE BOUNDARY セクションが無い場合、unit\_specifier に HECMW\_COUPLE\_UNIT1 もしくは HECMW\_COUPLE\_UNIT2 以外が指定された場合には、エラーとなります。

## hecmw\_couple\_is\_unit\_member\_u

連成ユニットのメンバプロセスであるか否かのフラグを提供します。

```
function hecmw_couple_is_unit_member_u(unit_id), result(is_member)  
  
character(len=HECMW_NAME_LEN) :: unit_id  
integer(kind=kint) :: is_member
```

### 引数

unit\_id

!COUPLE UNIT を特定する識別 ID

### 説明

連成ユニットのメンバプロセスであるか否かのフラグを提供する関数です。

本関数を呼び出した MPI プロセスが、全体制御ファイルの!COUPLE UNIT セクションのうち、NAME オプションが unit\_id であるセクションのメンバプロセスである場合には「1」が、メンバプロセスでない場合には「0」が返されます。

全体制御ファイルに unit\_id で特定される!COUPLE UNIT セクションが無い場合には、エラーとなります。

## hecmw\_couple\_is\_root

連成のルートプロセスであるか否かのフラグを提供します。

```
function hecmw_couple_is_root(boundary_id), result(is_root)

character(len=HECMW_NAME_LEN) :: boundary_id
integer(kind=kint) :: is_root
```

### 引数

boundary\_id

!COUPLE BOUNDARY を特定する識別 ID

### 説明

連成プロセスのルートプロセスであるか否かのフラグを提供する関数です。

本関数を呼び出した MPI プロセスが、全体制御ファイルの!COUPLE BOUNDARY セクションのうち、NAME オプションが boundary\_id であるセクションのルートプロセスである場合には「1」が、ルートプロセスでない場合には「0」が返されます。

全体制御ファイルに boundary\_id で特定される!COUPLE BOUNDARY セクションが無い場合には、エラーとなります。

## hecmw\_couple\_is\_unit\_root

連成ユニットのルートプロセスであるか否かのフラグを提供します。

```
function hecmw_couple_is_unit_root(boundary_id, unit_specifier),
    result(is_root)

character(len=HECMW_NAME_LEN) :: boundary_id
integer(kind=kint) :: unit_specifier
integer(kind=kint) :: is_root
```

### 引数

boundary\_id

!COUPLE BOUNDARY を特定する識別 ID

unit\_specifier

連成ユニット指定子

### 説明

連成ユニットのルートプロセスであるか否かのフラグを提供する関数です。

本関数を呼び出した MPI プロセスが、全体制御ファイルの!COUPLE BOUNDARY セクションのうち、NAME オプションが boundary\_id であるセクションの、unit\_specifier で指定される連成ユニットのルートプロセスである場合には「1」が、ルートプロセスでない場合には「0」が返されます。該当する!COUPLE BOUNDARY セクションの連成ユニット 1 側のルートプロセスを対象とする場合には unit\_specifier に HECMW\_COUPLE\_UNIT 1 を、連成ユニット 2 側のルートプロセスを対象とする場合には unit\_specifier に HECMW\_COUPLE\_UNIT2 を指定します。

全体制御ファイルに boundary\_id で特定される!COUPLE BOUNDARY セクションが無い場合、unit\_specifier に HECMW\_COUPLE\_UNIT1 もしくは HECMW\_COUPLE\_UNIT2 以外が指定された場合には、エラーとなります。

## hecmw\_couple\_is\_unit\_root\_u

連成ユニットのルートプロセスであるか否かのフラグを提供します。

```
function hecmw_couple_is_unit_root_u(unit_id), result(is_root)  
  
character(len=HECMW_NAME_LEN) :: unit_id  
integer(kind=kint) :: is_root
```

### 引数

unit\_id

!COUPLE UNIT を特定する識別 ID

### 説明

連成ユニットのルートプロセスであるか否かのフラグを提供する関数です。

本関数を呼び出した MPI プロセスが、全体制御ファイルの!COUPLE UNIT セクションのうち、NAME オプションが unit\_id であるセクションのルートプロセスである場合には「1」が、ルートプロセスでない場合には「0」が返されます。

全体制御ファイルに unit\_id で特定される!COUPLE UNIT セクションが無い場合には、エラーとなります。

## hecmw\_intercomm\_get\_size

連成ユニット間通信における MPI プロセス数を提供します。

```
function hecmw_intercomm_get_size(boundary_id), result(psize)

character(len=HECMW_NAME_LEN) :: boundary_id
integer(kind=kint) :: psize
```

### 引数

boundary\_id

!COUPLE BOUNDARY を特定する識別 ID

### 説明

連成ユニット間通信における MPI プロセス数を提供する関数です。

全体制御ファイルの!COUPLE BOUNDARY セクションのうち、NAME オプションが boundary\_id であるセクションに割り当てられた MPI プロセス数が返されます。

全体制御ファイルに boundary\_id で特定される!COUPLE BOUNDARY セクションが無い場合には、エラーとなります。

## hecmw\_intracomm\_get\_size

連成ユニット内通信における MPI プロセス数を提供します。

```
function hecmw_intracomm_get_size(boundary_id, unit_specifier),  
    result(psize)  
  
character(len=HECMW_NAME_LEN) :: boundary_id  
integer(kind=kint) :: unit_specifier  
integer(kind=kint) :: psize
```

### 引数

boundary\_id

!COUPLE BOUNDARY を特定する識別 ID

unit\_specifier

連成ユニット指定子

### 説明

連成ユニット内通信における MPI プロセス数を提供する関数です。

全体制御ファイルの!COUPLE BOUNDARY セクションのうち、NAME オプションが boundary\_id であるセクションの、unit\_specifier で指定される連成ユニットに割り当てられた MPI プロセス数が返されます。該当する!COUPLE BOUNDARY セクションの連成ユニット 1 側の MPI プロセス数を取得する場合には unit\_specifier に HECMW\_COUPLE\_UNIT1 を、連成ユニット 2 側の MPI プロセス数を取得する場合には unit\_specifier に HECMW\_COUPLE\_UNIT2 を指定します。

全体制御ファイルに boundary\_id で特定される!COUPLE BOUNDARY セクションが無い場合、unit\_specifier に HECMW\_COUPLE\_UNIT1 もしくは HECMW\_COUPLE\_UNIT2 以外が指定された場合には、エラーとなります。

## hecmw\_intracomm\_get\_size\_u

連成ユニット内通信における MPI プロセス数を提供します。

```
function hecmw_intracomm_get_size_u(unit_id), result(psize)

character(len=HECMW_NAME_LEN) :: unit_id
integer(kind=kint) :: psize
```

### 引数

unit\_id

!COUPLE UNIT を特定する識別 ID

### 説明

連成ユニット内通信における MPI プロセス数を提供する関数です。

全体制御ファイルの!COUPLE UNIT セクションのうち、NAME オプションが unit\_id であるセクションに割り当てられた MPI プロセス数が返されます。

全体制御ファイルに unit\_id で特定される!COUPLE UNIT セクションが無い場合には、エラーとなります。



## hecmw\_intercomm\_get\_rank

連成ユニット間通信における MPI プロセスランク番号を提供します。

```
function hecmw_intercomm_get_rank(boundary_id), result(rank)

character(len=HECMW_NAME_LEN) :: boundary_id
integer(kind=kint) :: rank
```

### 引数

boundary\_id

!COUPLE BOUNDARY を特定する識別 ID

### 説明

連成ユニット間通信における MPI プロセスランク番号を提供する関数です。

全体制御ファイルの!COUPLE BOUNDARY セクションのうち、NAME オプションが boundary\_id であるセクションに割り当てられた MPI プロセスのプロセスランク番号が返されます。

全体制御ファイルに boundary\_id で特定される!COUPLE BOUNDARY セクションが無い場合には、エラーとなります。

## hecmw\_intracomm\_get\_rank

連成ユニット内通信における MPI プロセスランク番号を提供します。

```
function hecmw_intracomm_get_rank(boundary_id, unit_specifier),  
    result(rank)  
  
character(len=HECMW_NAME_LEN) :: boundary_id  
integer(kind=kint) :: unit_specifier  
integer(kind=kint) :: rank
```

### 引数

boundary\_id

!COUPLE BOUNDARY を特定する識別 ID

unit\_specifier

連成ユニット指定子

### 説明

連成ユニット内通信における MPI プロセスランク番号を提供する関数です。

全体制御ファイルの!COUPLE BOUNDARY セクションのうち、NAME オプションが boundary\_id であるセクションの、unit\_specifier で指定される連成ユニットに割り当てられた MPI プロセスのプロセスランク番号が返されます。該当する!COUPLE BOUNDARY セクションの連成ユニット 1 側の MPI プロセスを対象とする場合には unit\_specifier に HECMW\_COUPLE\_UNIT1 を、連成ユニット 2 側の MPI プロセスを対象とする場合には unit\_specifier に HECMW\_COUPLE\_UNIT2 を指定します。

全体制御ファイルに boundary\_id で特定される!COUPLE BOUNDARY セクションが無い場合、unit\_specifier に HECMW\_COUPLE\_UNIT1 もしくは HECMW\_COUPLE\_UNIT2 以外が指定された場合には、エラーとなります。

## hecmw\_intracomm\_get\_rank\_u

連成ユニット内通信における MPI プロセスランク番号を提供します。

```
function hecmw_intracomm_get_rank_u(unit_id), result(rank)

character(len=HECMW_NAME_LEN) :: unit_id
integer(kind=kint) :: rank
```

### 引数

unit\_id

!COUPLE UNIT を特定する識別 ID

### 説明

連成ユニット内通信における MPI プロセスランク番号を提供する関数です。

全体制御ファイルの!COUPLE UNIT セクションのうち、NAME オプションが unit\_id であるセクションに割り当てられた MPI プロセスのプロセスランク番号が返されます。

全体制御ファイルに unit\_id で特定される!COUPLE UNIT セクションが無い場合には、エラーとなります。

## hecmw\_intercomm\_get\_comm

連成ユニット間通信における MPI コミュニケータを提供します。

```
function hecmw_intercomm_get_comm(boundary_id), result(comm)

character(len=HECMW_NAME_LEN) :: boundary_id
integer(kind=kint) :: comm
```

### 引数

boundary\_id

!COUPLE BOUNDARY を特定する識別 ID

### 説明

連成ユニット間通信における MPI コミュニケータを提供する関数です。

全体制御ファイルの!COUPLE BOUNDARY セクションのうち、NAME オプションが boundary\_id であるセクションにおける MPI コミュニケータが返されます。

全体制御ファイルに boundary\_id で特定される!COUPLE BOUNDARY セクションが無い場合には、エラーとなります。

## hecmw\_intracomm\_get\_comm

連成ユニット内通信における MPI コミュニケータを提供します。

```
function hecmw_intracomm_get_comm(boundary_id, unit_specifier),  
    result(comm)  
  
character(len=HECMW_NAME_LEN) :: boundary_id  
integer(kind=kint) :: unit_specifier  
integer(kind=kint) :: comm
```

### 引数

boundary\_id

!COUPLE BOUNDARY を特定する識別 ID

unit\_specifier

連成ユニット指定子

### 説明

連成ユニット内通信における MPI コミュニケータを提供する関数です。

全体制御ファイルの!COUPLE BOUNDARY セクションのうち、NAME オプションが boundary\_id であるセクションの、unit\_specifier で指定される連成ユニットにおける MPI コミュニケータが返されます。該当する!COUPLE BOUNDARY セクションの連成ユニット 1 側を対象とする場合には unit\_specifier に HECMW\_COUPLE\_UNIT1 を、連成ユニット 2 側を対象とする場合には unit\_specifier に HECMW\_COUPLE\_UNIT2 を指定します。

全体制御ファイルに boundary\_id で特定される!COUPLE BOUNDARY セクションが無い場合、unit\_specifier に HECMW\_COUPLE\_UNIT1 もしくは HECMW\_COUPLE\_UNIT2 以外が指定された場合には、エラーとなります。

## hecmw\_intracomm\_get\_comm\_u

連成ユニット内通信における MPI コミュニケータを提供します。

```
function hecmw_intracomm_get_comm_u(unit_id), result(comm)

character(len=HECMW_NAME_LEN) :: unit_id
integer(kind=kint) :: comm
```

### 引数

unit\_id

!COUPLE UNIT を特定する識別 ID

### 説明

連成ユニット内通信における MPI コミュニケータを提供する関数です。

全体制御ファイルの!COUPLE UNIT セクションのうち、NAME オプションが unit\_id であるセクションにおける MPI コミュニケータが返されます。

全体制御ファイルに unit\_id で特定される!COUPLE UNIT セクションが無い場合には、エラーとなります。

## hecmw\_intercomm\_get\_group

連成ユニット間通信における MPI グループを提供します。

```
function hecmw_intercomm_get_rank(boundary_id), result(group)

character(len=HECMW_NAME_LEN) :: boundary_id
integer(kind=kint) :: group
```

### 引数

boundary\_id

!COUPLE BOUNDARY を特定する識別 ID

### 説明

連成ユニット間通信における MPI グループを提供する関数です。

全体制御ファイルの!COUPLE BOUNDARY セクションのうち、NAME オプションが boundary\_id であるセクションにおける MPI グループが返されます。

全体制御ファイルに boundary\_id で特定される!COUPLE BOUNDARY セクションが無い場合には、エラーとなります。

## hecmw\_intracomm\_get\_group

連成ユニット内通信における MPI グループを提供します。

```
function hecmw_intracomm_get_group(boundary_id, unit_specifier),  
    result(group)  
  
character(len=HECMW_NAME_LEN) :: boundary_id  
integer(kind=kint) :: unit_specifier  
integer(kind=kint) :: group
```

### 引数

boundary\_id

!COUPLE BOUNDARY を特定する識別 ID

unit\_specifier

連成ユニット指定子

### 説明

連成ユニット内通信における MPI グループを提供する関数です。

全体制御ファイルの!COUPLE BOUNDARY セクションのうち、NAME オプションが boundary\_id であるセクションの、unit\_specifier で指定される連成ユニットにおける MPI グループが返されます。該当する!COUPLE BOUNDARY セクションの連成ユニット 1 側を対象とする場合には unit\_specifier に HECMW\_COUPLE\_UNIT1 を、連成ユニット 2 側を対象とする場合には unit\_specifier に HECMW\_COUPLE\_UNIT2 を指定します。

全体制御ファイルに boundary\_id で特定される!COUPLE BOUNDARY セクションが無い場合、unit\_specifier に HECMW\_COUPLE\_UNIT1 もしくは HECMW\_COUPLE\_UNIT2 以外が指定された場合には、エラーとなります。



## hecmw\_intracomm\_get\_group\_u

連成ユニット内通信における MPI グループを提供します。

```
function hecmw_intracomm_get_group_u(unit_id), result(group)

character(len=HECMW_NAME_LEN) :: unit_id
integer(kind=kint) :: group
```

### 引数

unit\_id

!COUPLE UNIT を特定する識別 ID

### 説明

連成ユニット内通信における MPI グループを提供する関数です。

全体制御ファイルの!COUPLE UNIT セクションのうち、NAME オプションが unit\_id であるセクションにおける MPI グループが返されます。

全体制御ファイルに unit\_id で特定される!COUPLE UNIT セクションが無い場合には、エラーとなります。
