# Supplementary material
Source: ML conference proceedings conference paper supplement (https://openreview.net/forum?id=FX0vR39SJ5q)
Supplement: supplementary_material [file attachment]

文部科学省次世代IT基盤構築のための研究開発  
「革新的シミュレーションソフトウェアの研究開発」

RSS21 フリーソフトウェア

# HEC ミドルウェア (HEC-MW)

PC クラスタ用ライブラリ型 HEC-MW

(hecmw-PC-cluster) バージョン 2.01

## IO, 全体制御 マニュアル

本ソフトウェアは文部科学省次世代IT基盤構築のための研究開発「革新的シミュレーションソフトウェアの研究開発」プロジェクトによる成果物です。本ソフトウェアを無償でご使用になる場合「RSS21 フリーソフトウェア使用許諾条件」をご了承頂くことが前提となります。営利目的の場合には別途契約の締結が必要です。これらの契約で明示されていない事項に関して、或いは、これらの契約が存在しない状況においては、本ソフトウェアは著作権法など、関係法令により、保護されています。

お問い合わせ先

(公開／契約窓口) (財)生産技術研究奨励会

〒153-8505 東京都目黒区駒場4-6-1

(ソフトウェア管理元) 東京大学生産技術研究所 計算科学技術連携研究センター

〒153-8505 東京都目黒区駒場4-6-1

Fax : 03-5452-6662

## 目 次

|                                 |    |
|---------------------------------|----|
| 1. 概要 .....                     | 1  |
| 2. 全体制御機能 .....                 | 2  |
| 2.1. 初期化処理 .....                | 2  |
| 2.2. 終了処理 .....                 | 2  |
| 3. 全体制御ファイル .....               | 3  |
| 3.1. 全体制御ファイル概要 .....           | 3  |
| 3.2. 入力規則 .....                 | 3  |
| (1) ヘッダ .....                   | 3  |
| (2) ヘッダ行 .....                  | 3  |
| (3) データ行 .....                  | 4  |
| (4) コメント行 .....                 | 4  |
| (5) 区切り文字 .....                 | 4  |
| (6) 空白の扱い .....                 | 4  |
| (7) 名前 .....                    | 4  |
| (8) ファイル名 .....                 | 4  |
| (9) 浮動小数点データ .....              | 5  |
| 3.3. ヘッダー一覧 .....               | 5  |
| !!, # .....                     | 6  |
| !CONTROL .....                  | 7  |
| !MESH .....                     | 8  |
| !MESH GROUP .....               | 10 |
| !RESTART .....                  | 12 |
| !RESULT .....                   | 14 |
| 4. HEC-MW 単一領域メッシュデータ .....     | 16 |
| 4.1. HEC-MW 単一領域メッシュデータ概要 ..... | 16 |
| 4.2. 入力規則 .....                 | 16 |
| (1) ヘッダ .....                   | 16 |
| (2) ヘッダ行 .....                  | 16 |
| (3) データ行 .....                  | 17 |
| (4) コメント行 .....                 | 17 |
| (5) 区切り文字 .....                 | 17 |
| (6) 空白の扱い .....                 | 17 |
| (7) 名前 .....                    | 17 |
| (8) ファイル名 .....                 | 18 |

|                              |    |
|------------------------------|----|
| (9) 浮動小数点データ .....           | 18 |
| 4.3. ヘッダー一覧 .....            | 18 |
| !!, # .....                  | 20 |
| !AMPLITUDE .....             | 21 |
| !EGROUP .....                | 23 |
| !ELEMENT .....               | 25 |
| !END .....                   | 28 |
| !EQUATION .....              | 29 |
| !HEADER .....                | 31 |
| !INITIAL CONDITION .....     | 32 |
| !MATERIAL .....              | 34 |
| !NGROUP .....                | 40 |
| !NODE .....                  | 42 |
| !SECTION .....               | 44 |
| !SGROUP .....                | 47 |
| !ZERO .....                  | 49 |
| 4.4. 特記事項 .....              | 50 |
| (1) !ELEMENT における材料物性値 ..... | 50 |
| (2) !EQUATION に関する処理 .....   | 50 |
| 5. 分散メッシュデータ構造体の概要 .....     | 51 |
| 5.1. 一般パラメータ設定 .....         | 52 |
| 5.2. 分散メッシュ情報 .....          | 53 |
| (1) 全体情報 .....               | 53 |
| (2) 節点情報 .....               | 54 |
| (3) 要素情報 .....               | 55 |
| (4) PE および通信情報 .....         | 57 |
| (5) 階層構造 .....               | 58 |
| (6) 下部構造 .....               | 58 |
| 5.3. セクション情報 .....           | 59 |
| 5.4. 材料物性情報 .....            | 60 |
| 5.5. 拘束グループ情報 .....          | 61 |
| 5.6. AMPLITUDE 情報 .....      | 61 |
| 5.7. グループ情報 (節点) .....       | 62 |
| 5.8. グループ情報 (要素) .....       | 63 |
| 5.9. グループ情報 (面) .....        | 64 |
| 6. 結果データ .....               | 65 |

|        |                            |     |
|--------|----------------------------|-----|
| 6.1.   | 結果データ構造体.....              | 65  |
| 6.2.   | 結果ファイルフォーマット .....         | 66  |
| 7.     | Fortan API リファレンス.....     | 67  |
| 8.     | C API リファレンス.....          | 95  |
| 8.1.   | データ構造一覧 .....              | 95  |
| 8.2.   | HEC-MW データ構造 .....         | 97  |
| 8.3.   | HEC-MW ファイル一覧.....         | 204 |
| 8.4.   | HEC-MW ファイル .....          | 206 |
| 9.     | HEC-MW 要素ライブラリ .....       | 485 |
| 10.    | HEC-MW を用いたプログラム作成方法 ..... | 498 |
| 10.1.  | はじめに .....                 | 498 |
| 10.2.  | コンパイル・リンク方法 .....          | 498 |
| 10.3.  | 最小の HEC-MW 利用プログラム .....   | 499 |
| 10.4.  | メッシュデータ入力方法 .....          | 500 |
| 10.5.  | メッシュデータ出力方法 .....          | 501 |
| 10.6.  | 結果データ出力方法.....             | 502 |
| 10.7.  | 結果データ入力方法.....             | 504 |
| 10.8.  | リスタートデータ出力方法.....          | 505 |
| 10.9.  | リスタートデータ入力方法.....          | 506 |
| 10.10. | 可視化方法（メモリ渡し） .....         | 507 |

## 1. 概要

並列計算を実施する場合、大規模かつ分散したデータを効率的に扱うことが必要である。特に並列 I/O については、利用者が容易に大規模分散データの処理を実施できるような工夫が求められる。

HEC-MW では、大規模分散データの処理に必要と考えられる以下の並列 I/O について、容易に操作可能なインタフェースを提供する。

- 全体メッシュデータ入力
- 分散メッシュデータ入出力
- リスタートデータ入出力
- 結果データ入出力

また、全体メッシュデータ入力においては、以下のメッシュデータが読み込み可能である。

- HEC-MW 単一領域メッシュデータ
- GeoFEM メッシュデータ
- ABAQUS メッシュデータ（現版では未実装）
- NASTRAN メッシュデータ（現版では未実装）
- FEMAP メッシュデータ（現版では未実装）

それらの入力はいずれ一つのインタフェースによって行うことができる。さらに、異なるタイプのメッシュデータを同時に入力し、一つのメッシュデータとして扱う事も可能である。

本マニュアルは、HEC-MW の機能のうち、全体制御機能と並列 I/O についてその利用方法を述べたものである。

## 2. 全体制御機能

### 2.1. 初期化处理

初期化处理は、各機能が正常に動作するために必要な処理を行う。

HEC-MW を利用するにあたり、ユーザは任意の機能呼び出して利用することができるが、その前に必ず初期化处理を行わなければならない。

MPI の初期化はここで行われる。

また、全体制御ファイルは HEC-MW の利用に必須であるが、その読み込みは初期化处理によって自動的に行われる。

### 2.2. 終了処理

HEC-MW の利用を終えるには、終了処理を行う必要がある。

MPI の終了処理はここで行われる。

### 3. 全体制御ファイル

#### 3.1. 全体制御ファイル概要

全体制御ファイルは、HEC-MW における制御情報を記述するためのファイルである。  
全体制御ファイルの特徴は以下のとおりである。

- 自由書式に基づく ASCII 形式のファイルである。
- 「！」で始まるヘッダとそれに続くデータから構成されている。
- ヘッダの記述の順番は基本的に自由である。
- データの区切り記号には「,」を使用する。

#### 3.2. 入力規則

全体制御ファイルは、ヘッダ行、データ行、コメント行から構成される。  
ヘッダ行には必ず一つのヘッダが含まれる。

##### (1) ヘッダ

全体制御ファイル内で、データの意味とデータブロックを特定する。  
行頭が「！」で始まる場合、ヘッダであるとみなされる。

##### (2) ヘッダ行

ヘッダとそれに伴うパラメータを記述する。

ヘッダ行はヘッダで始まっていなければならない。パラメータが必要な場合は、「,」を用いてその後に続けなければならない。パラメータが値をとる場合は、パラメータの後に「=」が続き、その後に値を記述する。

ヘッダ行を複数行にわたって記述することはできない。

### **(3) データ行**

ヘッダ行の次の行から開始され、必要なデータを記述する。

データ行は複数行にわたる可能性があるが、それは各ヘッダで定義されるデータ記述の規則により決定される。

データ行は必要ない場合もある。

### **(4) コメント行**

行頭が「!!」または「#」で始まる行はコメント行とみなされ、無視される。

コメント行はファイル中の任意の位置に挿入でき、その数に制限はない。

### **(5) 区切り文字**

データの区切り文字にはカンマ「,」を用いる。

### **(6) 空白の扱い**

空白は無視される。

### **(7) 名前**

名前に使用可能な文字は、アンダースコア「\_」、ハイフン「-」、英数字「a-zA-Z0-9」であるが、最初の一文字は「\_」または英字「a-zA-Z」で始まっていなければならない。大文字小文字の区別はなく、内部的には全て大文字として扱われる。

また、名前の最大長は 63 文字である。

### **(8) ファイル名**

ファイル名に使用可能な文字は、アンダースコア「\_」、ハイフン「-」、ピリオド「.」、ス



ラッシュ「/」，英数字「a-zA-Z0-9」である．

ファイル名は，特に記述がない限りパスを含んでもよい．相対パス，絶対パスのいずれも指定可能である．

また，ファイル名の最大長は 1023 文字である．

## (9) 浮動小数点データ

指数はあってもなくてもよい．指数の前には，「E」または「e」の記号をつけなければならない．

### 3.3. ヘッダー一覧

現在，HEC-MW 全体制御ファイルは以下のヘッダによって構成されている．

|              |             |
|--------------|-------------|
| !CONTROL     | 制御ファイル定義    |
| !MESH        | メッシュファイル定義  |
| !MESH GROUP  | メッシュグループ定義  |
| !RESTART     | リスタートファイル定義 |
| !RESULT      | 結果ファイル定義    |
| !COUPLE MESH | 連成メッシュ定義    |
| !COUPLE      | 連成定義        |

各ヘッダには，パラメータとそれぞれのヘッダに対応したデータの項目がある．

以下，上記各ヘッダについてデータ作成例とともに簡単に説明する．

## !!, #

コメント行先頭フラグ「!!」または「#」が先頭にある行はコメント行とみなされ、無視される。

### 1 行目

---

!!<comment>

---

又は

---

#<comment>

---

### パラメータ

なし

### 2 行目以降

なし

### 使用例

```
!! mesh file for input
!MESH, NAME=in-mesh, TYPE=HECMW-ENTIRE
mesh.in

# mesh file for output
!MESH, NAME=out-mesh, TYPE=HECMW-DIST
mesh.out
```

# !CONTROL

制御ファイルを指定する.

## 1 行目

---

```
!CONTROL, NAME=<name>
```

---

|       |          |
|-------|----------|
| パラメータ |          |
| NAME  | 識別子 (必須) |

| パラメータ名 | パラメータ値 | 内 容 |
|--------|--------|-----|
| NAME   | <name> | 識別子 |

## 2 行目以降

---

(2 行目) file

---

| 変数名  | 内容                                                     |
|------|--------------------------------------------------------|
| File | 制御ファイル名 (相対パス, 絶対パス共に指定可能. 相対パスの場合はカレントディレクトリからのパスとなる) |

## 使用例

```
!CONTROL, NAME=myctrl  
myctrl.dat
```

# !MESH

メッシュファイルを指定する.

## 1 行目

---

!MESH, NAME=<name>, TYPE=<type>[,optional parameter]

---

| パラメータ |              |
|-------|--------------|
| NAME  | 識別子 (必須)     |
| TYPE  | メッシュタイプ (必須) |
| IO    | 入出力指定 (省略可)  |

| パラメータ名 | パラメータ値             | 内 容              |
|--------|--------------------|------------------|
| NAME   | <name>             | 識別子              |
| TYPE   | HECMW-DIST         | HEC-MW 分散メッシュデータ |
|        | HECMW-ENTIRE       | HEC-MW 全体メッシュデータ |
|        | GeoFEM (現版では使用不可)  | GeoFEM メッシュデータ   |
|        | ABAQUS (現版では使用不可)  | ABAQUS メッシュデータ   |
|        | NASTRAN (現版では使用不可) | NASTRAN バルクデータ   |
|        | FEMAP (現版では使用不可)   | FEMAP メッシュデータ    |
| IO     | IN                 | 入力用 (デフォルト)      |
|        | OUT                | 出力用              |

## 2 行目以降

---

(2 行目) fileheader

---

| 変数名        | 内容                                                         |
|------------|------------------------------------------------------------|
| Fileheader | 制御ファイル名のヘッダ (相対パス, 絶対パス共に指定可能. 相対パスの場合はカレントディレクトリからのパスとなる) |

## 注意

IO パラメータはユーザが自由に使用してよい. IO パラメータの有無, パラメータ値は他に何も影響を与えない.

TYPE が HECMW-DIST の場合, データ行に指定する fileheader は, ファイル名末尾の「.<rank>」を除いたものである.

## 使用例

```
!MESH, NAME=input-mesh, TYPE=HECMW-ENTIRE  
mesh.in
```

# !MESH GROUP

メッシュグループの定義

!MESH で定義されたメッシュファイルをグループ化する.

## 1 行目

---

!MESH, GROUP, NAME=<name>

---

|       |          |
|-------|----------|
| パラメータ |          |
| NAME  | 識別子 (必須) |

|        |        |     |
|--------|--------|-----|
| パラメータ名 | パラメータ値 | 内容  |
| NAME   | <name> | 識別子 |

## 2 行目以降

---

(2 行目) mesh1, mesh2, ...

(以下同様)

---

|       |                            |
|-------|----------------------------|
| 変数名   | 内容                         |
| meshX | メッシュファイル識別子 (!MESH の NAME) |

## 注意

NAME は, !MESH のそれと共有される. したがって, !MESH と同じ NAME を指定することはできない.

メッシュファイル識別子で識別されるメッシュファイルが!MESH で定義されていない  
ければエラーとなる.

## 使用例

```
!MESH GROUP, NAME=input-mesh-grp  
input-mesh, input-mesh-mat
```

# !RESTART

リスタートファイルを指定する.

## 1 行目

---

!RESTART, NAME=<name>, IO=<io>

---

| パラメータ |            |
|-------|------------|
| NAME  | 識別子 (必須)   |
| IO    | 入出力指定 (必須) |

| パラメータ名 | パラメータ値 | 内容    |
|--------|--------|-------|
| NAME   | <name> | 識別子   |
| IO     | IN     | 入力用   |
|        | OUT    | 出力用   |
|        | INOUT  | 入出力両用 |

## 2 行目以降

---

(2 行目) fileheader

---

| 変数名        | 内容                                                     |
|------------|--------------------------------------------------------|
| fileheader | 制御ファイル名 (相対パス, 絶対パス共に指定可能. 相対パスの場合はカレントディレクトリからのパスとなる) |

## 注意

この定義によって生成されるファイル名は, fileheader+.<rank>となる.



## 使用例

```
!RESTART, NAME=restart-in, IO=IN  
restart.in
```

# !RESULT

結果ファイルを指定する.

## 1 行目

---

!RESULT, NAME=<name>,IO=<io>

---

|       |            |
|-------|------------|
| パラメータ |            |
| NAME  | 識別子 (必須)   |
| IO    | 入出力指定 (必須) |

| パラメータ名 | パラメータ値 | 内容  |
|--------|--------|-----|
| NAME   | <name> | 識別子 |
| IO     | IN     | 入力用 |
|        | OUT    | 出力用 |

## 2 行目以降

---

(2 行目) file

---

| 変数名        | 内容                                                     |
|------------|--------------------------------------------------------|
| fileheader | 制御ファイル名 (相対パス, 絶対パス共に指定可能. 相対パスの場合はカレントディレクトリからのパスとなる) |

## 注意

この定義によって生成されるファイル名は, fileheader+.<rank>となる.

## 使用例

```
!RESULT, NAME=result-out, IO=OUT  
result.out
```

## 4. HEC-MW 単一領域メッシュデータ

### 4.1. HEC-MW 単一領域メッシュデータ概要

単一領域メッシュデータは、HEC-MW においてメッシュデータ入力を行うためのファイルフォーマットの一つである。

単一領域メッシュデータの特徴は以下のとおりである。

- 自由書式に基づく ASCII 形式のファイルである。
- 「!」で始まるヘッダとそれに続くデータから構成されている。
- ヘッダの記述の順番は基本的に自由である。
- データの区切り記号には「,」を使用する。

### 4.2. 入力規則

単一領域メッシュデータは、ヘッダ行、データ行、コメント行から構成される。ヘッダ行には必ず一つのヘッダが含まれる。

#### (1) ヘッダ

単一領域メッシュデータ内で、データの意味とデータブロックを特定する。行頭が「!」で始まる場合、ヘッダであるとみなされる。

#### (2) ヘッダ行

ヘッダとそれに伴うパラメータを記述する。

ヘッダ行はヘッダで始まっていなければならない。パラメータが必要な場合は、「,」を用いてその後に続けなければならない。パラメータが値をとる場合は、パラメータの後に「=」が続き、その後に値を記述する。

ヘッダ行を複数行にわたって記述することはできない。

### (3) データ行

ヘッダ行の次の行から開始され、必要なデータを記述する。

データ行は複数行にわたる可能性があるが、それは各ヘッダで定義されるデータ記述の規則により決定される。

データ行は必要ない場合もある。

### (4) コメント行

行頭が「!!」または「#」で始まる行はコメント行とみなされ、無視される。

コメント行はファイル中の任意の位置に挿入でき、その数に制限はない。

### (5) 区切り文字

データの区切り文字にはカンマ「,」を用いる。

### (6) 空白の扱い

空白は無視される。

### (7) 名前

グループ名、材料名などの名前に使用可能な文字は、アンダースコア「\_」、ハイフン「-」、英数字「a-zA-Z0-9」であるが、最初の一文字は「\_」または英字「a-zA-Z」で始まっていなければならない。大文字小文字の区別はなく、内部的には全て大文字として扱われる。

なお、以下の名前は予約済みのため使用不可である。

- 「HECMW」で始まる名前
- 節点グループ名「ALL」, 「EQUATION\_BLOCK」
- 要素グループ名「ALL」

また、名前の最大長は 63 文字である。

## (8) ファイル名

ファイル名に使用可能な文字は、アンダースコア「\_」、ハイフン「-」、ピリオド「.」、スラッシュ「/」、英数字「a-zA-Z0-9」である。

ファイル名は、特に記述がない限りパスを含んでもよい。相対パス、絶対パスのいずれも指定可能である。

また、ファイル名の最大長は 1023 文字である。

## (9) 浮動小数点データ

指数はあってもなくてもよい。指数の前には、「E」または「e」の記号をつけなければならない。

## 4.3. ヘッダー一覧

HEC-MW 単一領域メッシュデータは以下のヘッダによって構成されている。

| ヘッダ名               | 内容            |
|--------------------|---------------|
| !AMPLITUDE         | 非定常荷重         |
| !ELEMENT           | コネクティビティ      |
| !EGROUP            | 要素グループ        |
| !ELEMENT           | 要素情報          |
| !EQUATION          | 拘束点情報         |
| !END               | 読み込み終了        |
| !HEADER            | メッシュファイルのタイトル |
| !INCLUDE           | 外部ファイル入力      |
| !INITIAL CONDITION | 初期条件          |
| !MATERIAL          | 材料情報          |
| !NGROUP            | 節点グループ        |
| !NODE              | 節点情報          |
| !SECTION           | セクション情報       |

|         |       |
|---------|-------|
| !SGROUP | 面グループ |
| !ZERO   | 絶対零度  |

各ヘッダには、パラメータとそれぞれのヘッダに対応したデータの項目がある。以下、上記各ヘッダについてデータ作成例とともに簡単に説明する。

## !!, #

コメント行先頭フラグ「!!」または「#」が先頭にある行はコメント行とみなされ、無視される。

### 1 行目

---

!!<comment>

---

又は

---

#<comment>

---

パラメータ

なし

### 2 行目以降

なし

### 使用例

```
!NODE
!! location of each node is defined by special code.
1, 0.0, 0.1, 0.2
# node 2 is on the surface
2, 3.0, 4.0, 5.0
```



# !AMPLITUDE

ステップ内での荷重条件を与える変数の時間変化を指定する.

## 1 行目

---

!AMPLITUDE, NAME=<name> [, optional parameter]

---

| パラメータ      |               |
|------------|---------------|
| NAME       | 名前 (必須)       |
| DEFINITION | タイプ (省略可)     |
| TIME       | 時間の種類 (省略可)   |
| VALUE      | 値の種類 (省略可)    |
| INPUT      | 外部ファイル名 (省略可) |

| パラメータ名     | パラメータ値     | 内 容                          |
|------------|------------|------------------------------|
| NAME       | <name>     | AMPLITUDE 名                  |
| DEFINITION | TABULAR    | デフォルト (現版ではデフォルトのみ許す)        |
| TIME       | STEP TIME  | デフォルト (現版ではデフォルトのみ許す)        |
| VALUE      | RELATIVE   | 相対値 (デフォルト)                  |
|            | ABSOLUTE   | 絶対値                          |
| INPUT      | <filename> | 外部ファイル名 (省略可), 2 行目以降との併用も可能 |

## 2 行目以降

---

(2 行目以降) VAL1, T1, VAL2, T2, VAL3, T3 ... (一行に四項まで)  
以下繰り返し

---

| 変数名  | 属性 | 内容          |
|------|----|-------------|
| VAL1 | R  | 時間 T1 における値 |

|      |   |             |
|------|---|-------------|
| T1   | R | 時間 T1       |
| VAL2 | R | 時間 T2 における値 |
| T2   | R | 時間 T2       |
| VAL3 | R | 時 T3 における値  |
| T3   | R | 時間 T3       |

# !EGROUP

要素グループの定義

## 1 行目

---

!EGROUP, EGRP=<egrp> [, optional parameter]

---

|          |                        |
|----------|------------------------|
| パラメータ    |                        |
| EGRP     | 要素グループ名（必須）            |
| GENERATE | 要素グループに属する節点の自動生成（省略可） |
| INPUT    | 外部ファイル名（省略可）           |

| パラメータ名   | パラメータ値     | 内 容                        |
|----------|------------|----------------------------|
| EGRP     | <egrp>     | 要素グループ名                    |
| GENERATE | なし         | 要素グループに属する節点の自動生成          |
| INPUT    | <filename> | 外部ファイル名（省略可），2 行目以降との併用も可能 |

## 2 行目以降（GENERATE を使用しない場合）

---

（2 行目） elem1, elem2, elem3 ...

（以下同様）

---

| 変数名   | 属性 | 内 容            |
|-------|----|----------------|
| elemX | I  | 要素グループに属する要素番号 |

## 2 行目以降（GENERATE を使用する場合）

---

（2 行目） elem1, elem2, elem3

---

---

(以下同様)

---

| 変数名   | 属 性 | 内 容                             |
|-------|-----|---------------------------------|
| Elem1 | I   | 要素グループ内の最初の要素番号                 |
| Elem2 | I   | 要素グループ内の最後の要素番号                 |
| Elem3 | I   | 要素番号増分 (省略可能, 省略時は elem3=1 となる) |

## 注意

- 1 行に任意の数の要素を入れることができる。また次のオプションが始まるまで、任意の数の行を挿入することができる。
- 指定する要素は「!EGROUP」より前に定義されている必要がある。
- 「!ELEMENT」オプションで定義されていない要素は除外され、警告メッセージが表示される。
- 指定された要素が既に同じグループ内に存在する場合は無視され、警告メッセージが表示される。
- 全ての要素は、「ALL」という名前の要素グループに属している (自動的に生成される)。
- 一つのグループを複数回にわけて定義できる。

## 使用例

|                                                                                                                                                                           |                                                                                                            |
|---------------------------------------------------------------------------------------------------------------------------------------------------------------------------|------------------------------------------------------------------------------------------------------------|
| <pre>!EGROUP, EGRP= EA01 1, 2, 3, 4, 5, 6 101, 102 205 !EGROUP, EGRP= EA02 101, 102 !EGROUP, EGRP= EA01 501, 505 !EGROUP, EGRP= EA04, GENERATE 301, 309, 2 311, 313</pre> | <p>グループ「EA01」に「501, 505」が追加される。</p> <p>グループ「EA04」に<br/>「301, 303, 305, 307, 309, 311, 312, 313」が追加される。</p> |
|---------------------------------------------------------------------------------------------------------------------------------------------------------------------------|------------------------------------------------------------------------------------------------------------|

# !ELEMENT

要素の定義

## 1 行目

---

!ELEMENT, TYPE=<type> [, optional parameter]

---

|         |                                                 |
|---------|-------------------------------------------------|
| パラメータ   |                                                 |
| TYPE    | 要素タイプ（必須）                                       |
| EGRP    | 要素グループ（省略可）                                     |
| MATITEM | 材料物性を要素ごとに定義する場合の物性項目数（セクションごとに物性を定義する場合は使用しない） |
| INPUT   | 外部ファイル名（省略可）                                    |

| パラメータ名 | パラメータ値 | 内 容                     |
|--------|--------|-------------------------|
| TYPE   | 111    | ロッド,リンク, トラス要素 (1 次)    |
|        | 112    | ロッド, リンク, トラス要素 (2 次)   |
|        | 231    | 三角形要素 (1 次)             |
|        | 232    | 三角形要素 (2 次)             |
|        | 241    | 四角形要素 (1 次)             |
|        | 242    | 四角形要素 (2 次)             |
|        | 341    | 四面体要素 (1 次)             |
|        | 342    | 四面体要素 (2 次)             |
|        | 351    | 三角柱要素 (1 次)             |
|        | 352    | 三角柱要素 (2 次)             |
|        | 361    | 六面体要素 (1 次)             |
|        | 362    | 六面体要素 (2 次)             |
|        | 371    | 四角錐要素 (1 次)             |
|        | 372    | 四角錐要素 (2 次)             |
|        | 431    | マスタースレーブ要素 (三角形断面, 1 次) |
|        | 432    | マスタースレーブ要素 (三角形断面, 2 次) |

|         |            |                            |
|---------|------------|----------------------------|
|         | 441        | マスタースレーブ要素（四角形断面，1 次）      |
|         | 442        | マスタースレーブ要素（四角形断面，2 次）      |
|         | 531        | インタフェース要素（三角形断面，1 次）       |
|         | 532        | インタフェース要素（三角形断面，2 次）       |
|         | 541        | インタフェース要素（四角形断面，1 次）       |
|         | 542        | インタフェース要素（四角形断面，2 次）       |
|         | 611        | 梁要素（1 次）                   |
|         | 612        | 梁要素（2 次）                   |
|         | 731        | 三角形シェル要素（1 次）              |
|         | 732        | 三角形シェル要素（2 次）              |
|         | 741        | 四角形シェル要素（1 次）              |
|         | 742        | 四角形シェル要素（2 次）              |
| EGRP    | <egrp>     | 要素グループ（省略可）                |
| MATITEM | <matiem>   | 材料物性を要素ごとに定義する場合の物性項目数     |
| INPUT   | <filename> | 外部ファイル名（省略可），2 行目以降との併用も可能 |

## 2 行目以降

---

（2 行目）ELEM\_ID, nod1, nod2, nod3, ..., MAT1, MAT2, ...

以下同様

---

| 変数名     | 属 性 | 内 容      |
|---------|-----|----------|
| ELEM_ID | I   | 要素番号     |
| nodX    | I   | コネクティビティ |
| MATy    | R   | 要素ごとの物性値 |

## 注意

- 要素タイプ、コネクティビティについての詳細は、「付録 HEC-MW 要素ライブラリ」を参照のこと。
- 要素番号は連続している必要はない。

- 「!ELEMENT」オプションは何回でも定義できる。
- 要素番号は自然数でなければならない。省略は不可。
- 同じ要素番号を重複して使用する場合、最後に入力した値が使用される。この場合、警告メッセージが出力される。
- 定義されていない節点をコネクティビティに使用することはできない。
- パラメータ「MATITEM」を使用して要素ごとに物性を入力した場合の値が優先して使用される。この場合、後述の「!SECTION」, 「!MATERIAL」オプションを使用して入力した物性値は使用されない。
- 一つの要素の定義を複数行にわたって記述してもよい。

## 使用例

```
!ELEMENT, TYPE=231
1, 1, 2, 3
2, 4, 8, 5
4, 6, 7, 8
!ELEMENT, TYPE=361
101, 101, 102, 122, 121, 201, 202, 222, 221
102, 102, 103, 123, 122, 202, 203, 223, 222
103, 103, 104, 124, 123, 203, 204, 224, 223
!ELEMENT, TYPE=361, MATITEM= 2
501, 501, 502, 522, 521, 601, 602, 622, 621, 1.00, 2.00
502, 502, 503, 523, 522, 602, 603, 623, 622, 1.20, 2.50
```

# !END

メッシュデータの終端

このヘッダが表れると、メッシュデータの読み込みを終了する.

## 1 行目

---

!END

---

パラメータ

なし

## 2 行目以降

なし



# !EQUATION

拘束節点グループの定義

## 1 行目

---

!EQUATION [, optional parameter]

---

|       |              |
|-------|--------------|
| パラメータ |              |
| INPUT | 外部ファイル名（省略可） |

| パラメータ名 | パラメータ値     | 内 容                        |
|--------|------------|----------------------------|
| INPUT  | <filename> | 外部ファイル名（省略可），2 行目以降との併用も可能 |

## 2 行目以降

---

（2 行目 ） NEQ

（3 行目以降） nod1, DOF1, A1, nod2, DOF2, A2 ...（一行に四項まで）

以下繰り返し

---

| 変数名  | 属 性 | 内 容                   |
|------|-----|-----------------------|
| NEQ  | I   | 方程式の項数                |
| nod1 | I/C | 第 1 節点または節点グループ       |
| DOF1 | I   | 第 1 節点または節点グループの拘束自由度 |
| A1   | R   | 第 1 節点または節点グループの係数    |
| nod2 | I/C | 第 2 節点または節点グループ       |
| DOF2 | I   | 第 2 節点または節点グループの拘束自由度 |
| A2   | R   | 第 2 節点または節点グループの係数    |

## 注意

- 「!NODE」で定義されていない節点，節点グループが指定された場合は無視され，警告メッセージが表示される．
- 第一項に指定された節点または節点グループの自由度は従属自由度となる。第二項以降には独立自由度を指定する必要があるため、第一項に指定した自由度を他の「!EQUATION」で第二項以降に指定した場合はエラーとなる。
- 「nod1=nod2」の場合は無視され，警告メッセージが表示される．
- 節点グループを指定した場合，節点数の整合性が取れない場合はエラーとなる．
- 自由度番号は解析のタイプ，要素によって異なる．整合がとれない自由度については無視され，警告メッセージが表示される．

## 使用例

```
!EQUATION
3
101, 1, 1.0, 102, 1, -1.0, 103, 1, -1.0
2
NG1, 2, 1.0, NG5, 2, -1.0
5
2061, 1, 1.0, 1011, 1, -0.25, 1111, 1, -0.25, 3011, 1, -0.25
3111, 1, -0.25
```

# !HEADER

メッシュファイルのタイトル

## 1 行目

---

!HEADER

---

パラメータ

なし

## 2 行目以降

---

(2 行目) TITLE

---

| 変数名   | 属性 | 内容       |
|-------|----|----------|
| TITLE | C  | ヘッダータイトル |

## 使用例

```
!HEADER
Mesh for CFD Analysis
```

## 注意

- 省略可能.
- ヘッダーは複数行にわたってもよいが、ヘッダーとして認識されるのは最初の行の 127 カラム目までである.
- 「!HEADER」を複数回定義すると、内容が更新され、警告メッセージが表示される.

# !INITIAL CONDITION

初期条件の定義

## 1 行目

---

!INITIAL CONDITION, TYPE=<type> [, optional parameter]

---

|       |              |
|-------|--------------|
| パラメータ |              |
| TYPE  | タイプ（必須）      |
| INPUT | 外部ファイル名（省略可） |

| パラメータ名 | パラメータ値      | 内 容                        |
|--------|-------------|----------------------------|
| TYPE   | TEMPERATURE | 温度                         |
| INPUT  | <filename>  | 外部ファイル名（省略可），2 行目以降との併用も可能 |

## 2 行目以降

---

（2 行目以降）nod1, VAL1（一行に一組）

以下繰り返し

---

| 変数名  | 属 性 | 内 容           |
|------|-----|---------------|
| nod1 | I/C | 節点番号または節点グループ |
| VAL1 | R   | 節点値           |

## 注意

- 「!NODE」で定義されていない節点，節点グループが指定された場合は無視され，警告メッセージが表示される。

- 同じ節点に対して再定義した場合はエラーとなる.

## 使用例

```
!INITIAL CONDITION, TYPE=TEMPERATURE  
101, 25.0  
NA01, 38.0
```

# !MATERIAL

材料物性の定義

物性が温度依存している場合は対応する温度ごとにテーブル入力が可能である

## 1 行目

---

!MATERIAL, NAME=<name> [, optional parameter]

---

| パラメータ |                          |
|-------|--------------------------|
| NAME  | 材料名（必須）                  |
| ITEM  | 物性項目数（省略可，省略した場合は「1」となる） |
| INPUT | 外部ファイル名（省略可）             |

| パラメータ名 | パラメータ値     | 内 容                        |
|--------|------------|----------------------------|
| NAME   | <name>     | 材料名                        |
| ITEM   | <ITEMnum>  | ユーザー定義による物性項目数             |
| INPUT  | <filename> | 外部ファイル名（省略可），2 行目以降との併用も可能 |

## 2 行目以降

---

(2 行目) !ITEM=1, SUBITEM=<k>

(3 行目) VAL1-1-1, VAL1-1-2, ... VAL1-1-k, TEMP1-1

(4 行目) VAL1-2-1, VAL1-2-2, ... VAL1-2-k, TEMP1-2

...

(L+2 行目) VAL1-L-1, VAL1-L-2, ... VAL1-L-k, TEMP1-L

以下「!ITEM=<ITEMnum>」まで繰り返し定義する

---

|                        |                                                     |
|------------------------|-----------------------------------------------------|
| サブパラメータ（「!ITEM」に対するもの） |                                                     |
| SUBITEM                | 各物性項目で定義されるサブ物性項目数（省略可，省略した場合は「1」となる，異方性等を定義するのに使用） |

| サブパラメータ名 | パラメータ値       | 内 容              |
|----------|--------------|------------------|
| SUBITEM  | <subITEMnum> | ユーザー定義によるサブ物性項目数 |

### 【m 番目の物性が温度依存している場合】

温度依存のテーブルの項目数が N の場合，以下のように入力する：

!ITEM=m, SUBITEM=k

VALm1-1, ..., VALm1-k, TEMPm1

VALm2-1, ..., VALm2-k, TEMPm2

...

VALmN-1, ..., VALmN-k, TEMPm-N

| 変数名     | 属 性 | 内 容       |
|---------|-----|-----------|
| VALmn-k | R   | 物性値（温度依存） |
| TEMPmn  | R   | 対応する温度    |

- TEMPm1 < TEMPm2 < ... < TEMPmN でなければならない
- 温度が TEMPm1 以下の場合は VALm1, TEMPmN 以上の場合は VALmN が使用される。

### 【m 番目の物性が温度依存していない場合】

!ITEM=m, SUBITEM=k

VALm1-1, ..., VALm1-k

VALm2-1, ..., VALm2-k

...

VALmN-1, ..., VALmN-k

| 変数名     | 属 性 | 内 容         |
|---------|-----|-------------|
| VALmn-k | R   | 物性値（温度依存なし） |

## 注意

- 「!SECTION」オプションで参照されている MATERIAL が定義されていない場合はエラーとなる。
- 「!ELEMENT」オプションで、パラメータ「MATITEM」を使用して要素ごとに物性を入力した場合の値が優先して使用される。この場合、「!MATERIAL」オプションを使用して入力した物性値は使用されない。
- 「!ITEM=m」サブオプションの数と、パラメータ「ITEM」の数が整合しない場合、定義されていないサブオプションがある場合はエラーとなる。
- 「!ITEM=m」サブオプションは、m の小さい順番に並んでいなくてもよい。
- 「!SUBITEM=k」サブオプション、温度依存性を使用する場合、省略した値は「0.0」となる。
- 温度依存性を使用する場合、温度の低い順に定義しなければならない。
- 温度依存性を使用する場合、同じ温度を 2 回以上使用した場合はエラーとなる。
- 材料名が重複した場合はエラーとなる。

## 使用例

```
!MATERIAL, NAME= STEEL, ITEM= 2
!ITEM=1          温度依存性なし
35.0
!ITEM=2
40.0,    0.0
45.0, 100.0
50.0, 200.0
!MATERIAL, NAME= CUPPER 項目数=1（デフォルト値）
!ITEM=1          温度依存性なし
80.0
```



## 誤った使用例

例 1 【パラメータ「ITEM」 と「!ITEM=m」サブオプションの数が整合していない-1】

```
!MATERIAL, NAME= STEEL, ITEM= 2
!ITEM=3
20.0
!ITEM=1
35.0
!ITEM= 2
40.0
```

例 2 【パラメータ「ITEM」 と「!ITEM=m」サブオプションの数が整合していない-2】

```
!MATERIAL, NAME= STEEL, ITEM= 3
!ITEM=3
20.0
!ITEM= 2
40.0
!MATERIAL, NAME= CUPPER
...
```

## 参考

```
program TEST
use hecmw
implicit REAL*8 (A-H,O-Z)
type (hecmwT_local_mesh) :: hecMESH

!C
!C      !MATERIAL, NAME=SUS304, ITEM=3
!C      !ITEM=1, SUBITEM= 3
!C          100.0, 200.0, 300.0, 0.00
!C          101.0, 210.0, 301.0, 1.00
!C          102.0, 220.0, 302.0, 2.00
!C          103.0, 230.0, 303.0, 3.00
!C      !ITEM=3, SUBITEM= 2
!C          1000.0, , 0.00
!C          1001.0, 1., 1.00
!C          1002.0, 2., 2.00
!C          1003.0, 3., 3.00
!C      !ITEM=2
!C          5000.0
!C
!C      !MATERIAL, NAME=FEC, ITEM=2
!C      !ITEM=1, SUBITEM= 3
!C          2100.0, 2200.0, 2300.0, 0.00
!C          2101.0, 2210.0, 2301.0, 1.00
!C          2102.0, 2220.0, 2302.0, 2.00
!C          2103.0, 2230.0, 2303.0, 3.00
!C          3103.0, 3230.0, 2304.0, 4.00
!C      !ITEM=2
!C          6000.0, 10.0
!C          6500.0, 30.0
!C

hecMESH%material%n_mat      = 2

nn= hecMESH%material%n_mat
```

```

allocate (hecMESH%material%mat_name(nn))
  hecMESH%material%mat_name(1)= 'SUS304'
  hecMESH%material%mat_name(2)= 'FEC'

nn= hecMESH%material%n_mat
allocate (hecMESH%material%mat_ITEM_index(0:nn))
  hecMESH%material%mat_ITEM_index(0)= 0
  hecMESH%material%mat_ITEM_index(1)= 3
  hecMESH%material%mat_ITEM_index(2)= hecMESH%material%mat_ITEM_index(1) + 2

  hecMESH%material%n_mat_ITEM=
hecMESH%material%mat_ITEM_index(hecMESH%material%n_mat)

nn= hecMESH%material%n_mat_ITEM
allocate (hecMESH%material%mat_subITEM_index(0:nn))
  hecMESH%material%mat_subITEM_index(0)= 0
  hecMESH%material%mat_subITEM_index(1)= 3
  hecMESH%material%mat_subITEM_index(2)= hecMESH%material%mat_subITEM_index(1) +
1
  hecMESH%material%mat_subITEM_index(3)= hecMESH%material%mat_subITEM_index(2) +
2
  hecMESH%material%mat_subITEM_index(4)= hecMESH%material%mat_subITEM_index(3) +
3
  hecMESH%material%mat_subITEM_index(5)= hecMESH%material%mat_subITEM_index(4) +
1

  hecMESH%material%n_mat_subITEM=
&      hecMESH%material%mat_subITEM_index(hecMESH%material%n_mat_ITEM)

nn= hecMESH%material%n_mat_subITEM
allocate (hecMESH%material%mat_TABLE_index(0:nn))
  hecMESH%material%mat_TABLE_index( 0)= 0
  hecMESH%material%mat_TABLE_index( 1)= 4
  hecMESH%material%mat_TABLE_index( 2)= hecMESH%material%mat_TABLE_index( 1) + 4
  hecMESH%material%mat_TABLE_index( 3)= hecMESH%material%mat_TABLE_index( 2) + 4
  hecMESH%material%mat_TABLE_index( 4)= hecMESH%material%mat_TABLE_index( 3) + 1
  hecMESH%material%mat_TABLE_index( 5)= hecMESH%material%mat_TABLE_index( 4) + 4
  hecMESH%material%mat_TABLE_index( 6)= hecMESH%material%mat_TABLE_index( 5) + 4
  hecMESH%material%mat_TABLE_index( 7)= hecMESH%material%mat_TABLE_index( 6) + 5
  hecMESH%material%mat_TABLE_index( 8)= hecMESH%material%mat_TABLE_index( 7) + 5
  hecMESH%material%mat_TABLE_index( 9)= hecMESH%material%mat_TABLE_index( 8) + 5
  hecMESH%material%mat_TABLE_index(10)= hecMESH%material%mat_TABLE_index( 9) + 2

  hecMESH%material%n_mat_TABLE=
&
hecMESH%material%mat_TABLE_index(hecMESH%material%n_mat_subITEM)

nn= hecMESH%material%n_mat_TABLE
allocate (hecMESH%material%mat_VAL (nn))
allocate (hecMESH%material%mat_TEMP(nn))

  hecMESH%material%mat_VAL = 0. d0
  hecMESH%material%mat_TEMP= 0. d0

  hecMESH%material%mat_VAL ( 1)= 100. 0d0
  hecMESH%material%mat_TEMP( 1)= 0. 0d0
  hecMESH%material%mat_VAL ( 2)= 101. 0d0
  hecMESH%material%mat_TEMP( 2)= 1. 0d0
  hecMESH%material%mat_VAL ( 3)= 102. 0d0
  hecMESH%material%mat_TEMP( 3)= 2. 0d0
  hecMESH%material%mat_VAL ( 4)= 103. 0d0
  hecMESH%material%mat_TEMP( 4)= 3. 0d0

  hecMESH%material%mat_VAL ( 5)= 200. 0d0
  hecMESH%material%mat_TEMP( 5)= 0. 0d0

  hecMESH%material%mat_VAL (13)= 5000. 0d0

  hecMESH%material%mat_VAL (14)= 1000. 0d0
  hecMESH%material%mat_TEMP(14)= 0. 0d0
  hecMESH%material%mat_VAL (15)= 1001. 0d0
  hecMESH%material%mat_TEMP(15)= 1. 0d0

```

```

hecMESH%material%mat_VAL (16)= 1002.0d0
hecMESH%material%mat_TEMP (16)= 2.0d0
hecMESH%material%mat_VAL (17)= 1003.0d0
hecMESH%material%mat_TEMP (17)= 3.0d0

hecMESH%material%mat_VAL (18)= 0.0d0
hecMESH%material%mat_TEMP (18)= 0.0d0
hecMESH%material%mat_VAL (19)= 1.0d0
hecMESH%material%mat_TEMP (19)= 1.0d0
hecMESH%material%mat_VAL (20)= 2.0d0
hecMESH%material%mat_TEMP (20)= 2.0d0
hecMESH%material%mat_VAL (21)= 3.0d0
hecMESH%material%mat_TEMP (21)= 3.0d0

hecMESH%material%mat_VAL (22)= 2100.0d0
hecMESH%material%mat_TEMP (22)= 0.0d0
hecMESH%material%mat_VAL (23)= 2101.0d0
hecMESH%material%mat_TEMP (23)= 1.0d0
hecMESH%material%mat_VAL (24)= 2102.0d0
hecMESH%material%mat_TEMP (24)= 2.0d0
hecMESH%material%mat_VAL (25)= 2103.0d0
hecMESH%material%mat_TEMP (25)= 3.0d0
hecMESH%material%mat_VAL (26)= 3103.0d0
hecMESH%material%mat_TEMP (26)= 4.0d0

write (*, '(a,i10)') '%n_mat_ITEM ', hecMESH%material%n_mat_ITEM
write (*, '(a,i10)') '%n_mat_subITEM', hecMESH%material%n_mat_subITEM
write (*, '(a,i10)') '%n_mat_TABLE ', hecMESH%material%n_mat_TABLE

end program TEST

```

# !NGROUP

節点グループの定義

## 1 行目

---

!NGROUP, NGRP=<ngrp> [, optional parameter]

---

| パラメータ    |                        |
|----------|------------------------|
| NGRP     | 節点グループ名（必須）            |
| GENERATE | 節点グループに属する節点の自動生成（省略可） |
| INPUT    | 外部ファイル名（省略可）           |

| パラメータ名   | パラメータ値     | 内 容                         |
|----------|------------|-----------------------------|
| NGRP     | <ngrp>     | 節点グループ名                     |
| GENERATE | なし         | 節点グループに属する節点の自動生成           |
| INPUT    | <filename> | 外部ファイル名（省略可）, 2 行目以降との併用も可能 |

## 2 行目以降（GENERATE を使用しない場合）

---

（2 行目） nod1, nod2, nod3

（以下同様）

---

| 変数名  | 属 性 | 内 容            |
|------|-----|----------------|
| nodX | I   | 節点グループに属する節点番号 |

## 2 行目以降（GENERATE を使用する場合）

---

（2 行目） nod1, nod2, nod3

---

---

(以下同様)

---

| 変数名  | 属 性 | 内 容                          |
|------|-----|------------------------------|
| nod1 | I   | 節点グループ内の最初の節点番号              |
| nod2 | I   | 節点グループ内の最後の節点番号              |
| nod3 | I   | 節点番号増分（省略可能、省略時は nod3=1 となる） |

## 注意

- 1 行に任意の数の節点を入れることができる。また次のオプションが始まるまで、任意の数の行を挿入することができる。
- 指定する節点は「!NGROUP」より前に定義されている必要がある。
- 「!NODE」オプションで定義されていない節点は除外され、警告メッセージが表示される。
- 指定された節点が既に同じグループ内に存在する場合は無視され、警告メッセージが表示される。
- 全ての節点は、「ALL」という名前の節点グループに属している（自動的に生成される）。
- 一つのグループを複数回にわけて定義できる。

## 使用例

|                               |                                                 |
|-------------------------------|-------------------------------------------------|
| !NGROUP, NGRP= NA01           |                                                 |
| 1, 2, 3, 4, 5, 6              |                                                 |
| 101, 102                      |                                                 |
| !NGROUP, NGRP= NA02           |                                                 |
| 101, 102                      |                                                 |
| !NGROUP, NGRP= NA01           | グループ「NA01」に「501, 505」が追加される。                    |
| 501, 505                      |                                                 |
| !NGROUP, NGRP= NA02           | グループ「NA02」に「501, 505」が追加される。                    |
| 501, 505                      |                                                 |
| !NGROUP, NGRP= NA04, GENERATE | グループ「NA04」に                                     |
| 301, 309, 2                   | 「301, 303, 305, 307, 309, 311, 312, 313」が追加される。 |
| 311, 313                      |                                                 |

# !NODE

節点座標の定義

## 1 行目

---

!NODE [, optional parameter]

---

|        |              |
|--------|--------------|
| パラメータ  |              |
| SYSTEM | 座標系（省略可）     |
| NGRP   | 節点グループ（省略可）  |
| INPUT  | 外部ファイル名（省略可） |

| パラメータ名 | パラメータ値     | 内容                         |
|--------|------------|----------------------------|
| SYSTEM | R          | デカルト座標系（デフォルト値）            |
|        | C          | 円筒座標系                      |
| NGRP   | <ngrp>     | 節点グループ（省略可）                |
| INPUT  | <filename> | 外部ファイル名（省略可），2 行目以降との併用も可能 |

## 2 行目以降

---

（2 行目）NODE\_ID, Xcoord, Ycoord, Zcoord 省略された場合は「0.0」が入る  
以下同様

---

| 変数名     | 属 性 | 内容   |
|---------|-----|------|
| NODE_ID | I   | 節点番号 |
| Xcoord  | R   | X 座標 |
| Ycoord  | R   | Y 座標 |
| Zcoord  | R   | Z 座標 |

## 注意

- 節点座標は区切り記号を含めて全て省略可能である.
- 既に定義されている節点を再定義した場合, 内容が更新され, 警告メッセージが表示される.
- 「!ELEMENT」で参照されない節点は除外される.

## 使用例

```
!NODE, NGRP= TEST
1, 0.0, 0.0, 0.0
2, 0.0, 0.1, 0.0
3, 0.0,, 1.5      Y座標は「0.0」
4,                X,Y,Z座標は「0.0」
```

# !SECTION

セクションの定義

## 1 行目

---

!SECTION, TYPE=<type>, EGRP=<egrp> [, optional parameter]

---

|           |                                                                       |
|-----------|-----------------------------------------------------------------------|
| パラメータ     |                                                                       |
| TYPE      | セクションタイプ (必須)                                                         |
| EGRP      | 要素グループ (必須)                                                           |
| MATERIAL  | ユーザー定義材料名 (省略可, 省略した場合, 材料名は「ALL」となるが, 「ALL」という材料についてはユーザーが定義する必要がある) |
| COMPOSITE | 複数の材料から構成されている場合 (MATERIAL とは排他, 省略可, 省略した場合は=1 となる) 現版では使用不可.        |
| SECOPT    | 要素タイプ用補助パラメータ (省略可, 省略した場合は=0 となる)                                    |
| INPUT     | 外部ファイル名 (省略可)                                                         |

| パラメータ名    | パラメータ値      | 内容                             |
|-----------|-------------|--------------------------------|
| TYPE      | SOLID       | ロッド, 三角形, 四角形, 四面体, 三角柱, 六面体要素 |
|           | SHELL       | シェル要素                          |
|           | INTERFACE   | インタフェース要素                      |
| EGRP      | <egrp>      | 要素グループ (必須)                    |
| MATERIAL  | <material > | ユーザー定義による材料名                   |
| COMPOSITE | <n_comp>    | 複合材料数                          |
| SECOPT    | <secopt>    | = 0 : 指定なし, 平面応力               |
|           |             | = 1 : 平面歪                      |
|           |             | = 2 : 軸対称                      |
|           |             | =10 : 0+次数低減積分                 |
|           |             | =11 : 1+次数低減積分                 |
|           |             | =12 : 2+次数低減積分                 |



|       |            |                            |
|-------|------------|----------------------------|
| INPUT | <filename> | 外部ファイル名（省略可），2 行目以降との併用も可能 |
|-------|------------|----------------------------|

## 2 行目以降

### 【TYPE=SOLID】の場合

---

（2 行目）THICKNESS

---

| 変数名       | 属 性 | 内 容      |
|-----------|-----|----------|
| THICKNESS | R   | 要素厚さ，断面積 |

- 「TYPE=SOLID」の場合，「THICKNESS」は省略可，デフォルト値（1.0）が入る．
- THICKNESS は 0.0 より大きい値でなければならない．

### 【TYPE=SHELL】の場合

---

（2 行目）THICKNESS, INTEGPOINTS

---

| 変数名         | 属 性 | 内 容        |
|-------------|-----|------------|
| THICKNESS   | R   | シェル断面厚さ    |
| INTEGPOINTS | I   | シェル断面方向積分点 |

- THICKNESS は 0.0 より大きい値，INTEGPOINTS は自然数でなければならない．

### 【TYPE=INTERFACE】の場合

---

（2 行目）THICKNESS, GAPCON, GAPRAD1, GAPRAD2

---

| 変数名       | 属 性 | 内 容                  |
|-----------|-----|----------------------|
| THICKNESS | R   | 断面厚さ                 |
| GAPCON    | R   | ギャップ熱伝達係数（省略時 0）     |
| GAPRAD1   | R   | ギャップ輻射熱伝達係数-1（省略時 0） |
| GAPRAD2   | R   | ギャップ輻射熱伝達係数-2（省略時 0） |

- THICKNESS は 0.0 より大きい値でなければならない。

## 注意

- パラメータ「TYPE」が要素タイプと整合していない場合はエラーとなる。
- 「!SECTION, EGRP=ALL」が必要となる場合はユーザーが定義しなければならない。
- SECTION 情報を持たない要素がある場合はエラーとなる。
- セクション名が重複した場合はエラーとなる。

## 使用例

```
!SECTION, EGRP=SHELL1, TYPE=SOLID, MATERIAL=STEEL
2.5
!SECTION, EGRP=SHELL2, TYPE=SOLID, MATERIAL=STEEL 厚さ1.0
!SECTION, EGRP=BEAM1, TYPE=BEAM, MATERIAL=CUPPER
3.0, 5.0
```

# !SGROUP

面グループの定義

## 1 行目

---

!SGROUP, SGRP=<grp> [, optional parameter]

---

| パラメータ |              |
|-------|--------------|
| SGRP  | 面グループ名（必須）   |
| INPUT | 外部ファイル名（省略可） |

| パラメータ名 | パラメータ値     | 内 容                        |
|--------|------------|----------------------------|
| SGRP   | <grp>      | 面グループ名                     |
| INPUT  | <filename> | 外部ファイル名（省略可），2 行目以降との併用も可能 |

## 2 行目以降

---

（2 行目） elem1, lsuf1, elem2, lsuf2, elem3, lsuf3, ...

（以下同様）

---

| 変数名   | 属 性 | 内 容               |
|-------|-----|-------------------|
| elemX | I   | 面グループに属する要素番号     |
| lsufX | I   | 面グループに属する要素の局所面番号 |

## 注意

- 要素タイプと面番号については、「付録 HEC-MW 要素ライブラリ」を参照のこと。
- （要素，局所面番号）という組み合わせによって面を構成する。1 行に任意の数の面

を入れることができる。また次のオプションが始まるまで、任意の数の行を挿入することができる。（要素，局所面番号）という組み合わせは必ず同一の行になければならない。

- 指定する要素は「!SGROUP」より前に定義されている必要がある。
- 要素が「!ELEMENT」オプションで定義されていない場合は無視され，警告メッセージが表示される。
- 「!ELEMENT」オプションで定義されていない要素を含む面は除外され，警告メッセージが表示される。
- 要素タイプと面番号の整合性が取れない面は除外され，警告メッセージが表示される。
- 一つのグループを複数回にわけて定義できる。

## 使用例

```
!SGROUP, SGRP= SUF01
101, 1, 102, 1, 103, 2, 104, 2
201, 1, 202, 1
501, 1
!SGROUP, SGRP= SUF02
101, 2, 102, 2
!SGROUP, SGRP= EA01
601, 1
602, 2
```

グループ「EA01」に「(601, 1), (602, 2)」が追加。

## 誤った使用例

例 1 【（要素，局所面番号）の組が複数行にわたっている】

```
!SGROUP, SGRP= SUF01
101, 1, 102, 1, 103
1, 104, 1
```

例 2 【局所面番号と要素タイプの整合性がとれない】

```
!ELEMENT, TYPE= 231, SECTION= A
101, 1, 2, 3
102, 2, 3, 4
...
!SGROUP, SGRP= SUF01
101, 1
101, 2
101, 4
```

三角形要素に第4面は存在しないので，この組み合わせは無視される

# !ZERO

絶対零度

## 1 行目

---

!ZERO

---

パラメータ

なし

## 2 行目以降

---

(2 行目) ZERO

---

| 変数名  | 属 性 | 内 容  |
|------|-----|------|
| ZERO | R   | 絶対零度 |

## 注意

- 省略可能. 省略された場合は「絶対零度=0」となる.
- 「!ZERO」を複数回定義すると, 内容が更新され, 警告メッセージが表示される.

## 使用例

|                  |
|------------------|
| !ZERO<br>-273.16 |
|------------------|

## 4.4. 特記事項

### (1) !ELEMENT における材料物性値

!ELEMENT で要素ごとに材料物性を指定した場合、それを表す材料情報が自動生成され、!SECTION で与えられた材料物性を上書きする。

例えば、以下の!ELEMENT が定義された場合、

```
!ELEMENT, TYPE=361, MATITEM=2  
501, 501, 502, 522, 521, 601, 602, 622, 621, 1.00, 2.00
```

このデータから生成される材料物性の定義情報は、次の!MATERIAL によって生成されるそれと等しい。

```
!MATERIAL, NAME=HECMW-MAT501  
!ITEM=1, SUBITEM=2  
1.00, 2.00
```

材料名は、HECMW-MAT[global element ID]となる。

### (2) !EQUATION に関する処理

!EQUATION の入力があった場合、その情報からリンク要素を自動生成する。

生成されるリンク要素は、!EQUATION の第一項と、第二～N 項との組み合わせで、それぞれの項で指定されている節点をコネクティビティとする。リンク要素の要素番号は 9XY であり、X は第一項の拘束自由度、Y はもう一つの項の拘束自由度である。

分散データ構造体において、リンク要素の hecmwST\_local\_mesh%elem\_mat\_ID と hecmwST\_local\_mesh%section\_ID はそれぞれ本来の意味を持たない。

elem\_mat\_ID には、リンク要素を作成した際に、!EQUATION の第一項とリンクした項の番号が入り、section\_ID には、拘束方程式の通し番号が入る。

## 5. 分散メッシュデータ構造体の概要

分散メッシュデータ関連構造体は以下の各部分から構成されている. (\*) をつけたものは実際に分散メッシュデータから読み込まれる情報を含んでいる :

(1) 制御情報 (\*)

内 容 : 全体的な制御に関する情報

(2) 分散メッシュ情報 (\*)

内 容 : 節点, 要素, 通信, 階層構造

構造体 : `hecmwST_local_mesh`

(3) セクション情報 (\*)

内 容 : 各要素の属するセクションの情報

構造体 : `hecmwST_section`

(4) 材料物性情報 (\*)

内 容 : 各材料の物性情報, 温度依存性テーブルも含む

構造体 : `hecmwST_material`

(5) 拘束グループ情報 (\*)

内 容 : 拘束グループに関する情報

構造体 : `hecmwST_mpc`

(6) グループ情報 (\*)

内 容 : 節点, 要素, 面グループに関する情報

構造体 : `hecmwST_node_grp`, `hecmwST_elem_grp`, `hecmwST_surf_grp`

## 5.1. 一般パラメータ設定

```
module hecmw_util
  implicit none
  include 'mpif.h'
  public

  integer(kind=4),parameter:: kint = 4
  integer(kind=4),parameter:: kreal = 8

  integer(kind=kint),parameter :: HECMW_NAME_LEN      = 63
  integer(kind=kint),parameter :: HECMW_HEADER_LEN    = 127
  integer(kind=kint),parameter :: HECMW_MSG_LEN       = 255
  integer(kind=kint),parameter :: HECMW_FILENAME_LEN  = 1023

  integer(kind=kint),parameter :: hecmw_sum           = 46801
  integer(kind=kint),parameter :: hecmw_prod         = 46802
  integer(kind=kint),parameter :: hecmw_max          = 46803
  integer(kind=kint),parameter :: hecmw_min          = 46804
  integer(kind=kint),parameter :: hecmw_integer       = 53951
  integer(kind=kint),parameter :: hecmw_single_precision = 53952
  integer(kind=kint),parameter :: hecmw_double_precision = 53953
  integer(kind=kint),parameter :: hecmw_character    = 53954
```

| 変数名                | 内容           |
|--------------------|--------------|
| kint               | INT 変数のバイト長  |
| kreal              | REAL 変数のバイト長 |
| HECMW_NAME_LEN     | 名前の最大長       |
| HECMW_HEADER_LEN   | HEADER の最大長  |
| HECMW_MSG_LEN      | ログメッセージの最大長  |
| HECMW_FILENAME_LEN | ファイル名の最大長    |



## 5.2. 分散メッシュ情報

分散メッシュ情報について，Fortran 版を用いて説明する．C 版においても構造や変数名は同じである<sup>1</sup>が，配列の添字が 0 から始まることに注意しなければならない．

```
type hecmwST_local_mesh
```

### (1) 全体情報

```
character(HECMW_FILENAME_LEN)      :: gridfile
character(HECMW_FILENAME_LEN), pointer :: files(:)
character(HECMW_HEADER_LEN)         :: header
integer(kind=kint) :: hecmw_flag_adapt
integer(kind=kint) :: hecmw_flag_initcon
integer(kind=kint) :: hecmw_n_file
integer(kind=kint) :: hecmw_flag_parttype
integer(kind=kint) :: hecmw_flag_partdepth
integer(kind=kint) :: hecmw_flag_version
real(kind=kreal)   :: zero_temp
```

| 変数名                  | 配列要素数          | 内容                                           |
|----------------------|----------------|----------------------------------------------|
| gridfile             |                | グリッドファイル名                                    |
| hecmw_n_file         |                | もろもろのファイル数                                   |
| files                | (hecmw_n_file) | もろもろのファイル                                    |
| header               |                | ヘッダ                                          |
| hecmw_flag_adapt     |                | 階層構造使用の有無 (=0 : NO, =1 : YES)                |
| hecmw_flag_initcon   |                | 初期条件使用 (=0 : NO, =1 : YES)                   |
| hecmw_flag_parttype  |                | 領域分割形式 (=1 : Node-based, =2 : Element-based) |
| hecmw_flag_partdepth |                | 部分領域間袖領域のオーバーラップ深さ                           |
| hecmw_flag_version   |                | バージョン                                        |
| zero_temp            |                | 絶対零度 (温度)                                    |

<sup>1</sup> 一部例外あり．hecmwST\_local\_mesh の MPI\_COMM は，C 版では HECMW\_COMM となる．

## (2) 節点情報

```

integer(kind=kint)      :: n_node
integer(kind=kint)      :: nn_internal
integer(kind=kint)      :: n_dof
integer(kind=kint)      :: n_dof_grp
real(kind=kreal), pointer :: node(:)
integer(kind=kint), pointer :: node_ID(:)
integer(kind=kint), pointer :: global_node_ID(:)
integer(kind=kint), pointer :: node_val_index(:)
real(kind=kreal), pointer :: node_val_item(:)
integer(kind=kint), pointer :: node_dof_index(:)
integer(kind=kint), pointer :: node_dof_item(:)
integer(kind=kint), pointer :: node_init_val_index(:)
real(kind=kreal), pointer :: node_init_val_item(:)
integer(kind=kint), pointer :: node_internal_list(:)

```

| 変数名                 | 配列要素数                       | 内容                                                                                         |
|---------------------|-----------------------------|--------------------------------------------------------------------------------------------|
| n_node              |                             | 総節点数                                                                                       |
| nn_internal         |                             | 内部節点数                                                                                      |
| n_dof               |                             | 節点最大自由度数                                                                                   |
| n_dof_grp           |                             | 自由度グループ数                                                                                   |
| node                | 3*n_node                    | 節点座標<br>node(3*k-2) : 節点 k の X 座標<br>node(3*k-1) : 節点 k の Y 座標<br>node(3*k ) : 節点 k の Z 座標 |
| node_ID             | 2*n_node                    | 節点 ID (ローカル番号, 所属領域)<br>node_id(2*i-1) : 節点 i のローカル番号<br>node_id(2*i) : 節点 i の所属領域         |
| global_node_ID      | n_node                      | グローバル節点 ID                                                                                 |
| node_val_index      | 0:n_node                    | 節点物理量インデックス                                                                                |
| node_val_item       | node_val_index(n_node)      | 節点物理量                                                                                      |
| node_dof_index      | 0:n_dof_grp                 | 自由度用インデックス                                                                                 |
| node_dof_item       | n_dof_grp                   | 自由度                                                                                        |
| node_init_val_index | 0: n_node                   | 初期条件用インデックス                                                                                |
| node_init_val_item  | node_init_val_index(n_node) | 初期条件                                                                                       |
| node_internal_list  | nn_internal                 | 内部節点リスト                                                                                    |

### (3) 要素情報

```

integer(kind=kint)      :: n_elem
integer(kind=kint)      :: ne_internal
integer(kind=kint)      :: n_elem_type
integer(kind=kint)      :: n_elem_mat_ID
integer(kind=kint), pointer :: elem_type_index(:)
integer(kind=kint), pointer :: elem_type_item(:)
integer(kind=kint), pointer :: elem_type(:)
integer(kind=kint), pointer :: section_ID(:)
integer(kind=kint), pointer :: elem_mat_ID_index(:)
integer(kind=kint), pointer :: elem_mat_ID_item(:)
integer(kind=kint), pointer :: elem_node_index(:)
integer(kind=kint), pointer :: elem_node_item(:)
integer(kind=kint), pointer :: elem_ID(:)
integer(kind=kint), pointer :: global_elem_ID(:)
integer(kind=kint), pointer :: elem_internal_list(:)
integer(kind=kint), pointer :: elem_mat_int_index(:)
real(kind=kreal), pointer :: elem_mat_int_val(:)
integer(kind=kint), pointer :: elem_val_index(:)
real(kind=kreal), pointer :: elem_val_item(:)

```

| 変数名                | 配列要素数                      | 内容                                  |
|--------------------|----------------------------|-------------------------------------|
| n_elem             |                            | 総要素数                                |
| ne_internal        |                            | 内部要素数                               |
| n_elem_type        |                            | 要素タイプの種類                            |
| n_elem_mat_ID      |                            | = elem_mat_ID_index(n_elem)         |
| elem_type_index    | 0:n_elem_type              | 要素タイプのインデックス                        |
| elem_type_item     | n_elem_type                | 要素タイプの内容                            |
| elem_type          | n_elem                     | 要素タイプ                               |
| section_ID         | n_elem                     | セクション番号                             |
| elem_mat_ID_index  | 0:n_elem                   | 材料物性 ID のための一次元インデックス (COMPOSITE 用) |
| elem_mat_ID_item   | elem_mat_ID_index(n_elem)  | 材料物性 ID 配列 (COMPOSITE 用)            |
| elem_node_index    | 0:n_elem                   | 要素コネクティビティ用一次元インデックス                |
| elem_node_item     | elem_node_index(n_elem)    | 要素コネクティビティ用配列                       |
| elem_ID            | 2*n_elem                   | 要素 ID (ローカル番号, 所属領域)                |
| global_elem_ID     | n_elem                     | グローバル要素 ID                          |
| elem_internal_list | ne_internal                | 内部要素リスト                             |
| elem_mat_int_index | 0: n_elem                  | 材料物性用一次元インデックス (内部処理用)              |
| elem_mat_int_val   | elem_mat_int_index(n_elem) | 材料物性用配列 (内部処理用)                     |

|                |                        |             |
|----------------|------------------------|-------------|
| elem_val_index | 0:n_elem               | 要素物理量インデックス |
| elem_val_item  | elem_val_index(n_elem) | 要素物理量       |

#### (4) PE および通信情報

```

integer(kind=kint)      :: zero
integer(kind=kint)      :: MPI_COMM
integer(kind=kint)      :: PETOT
integer(kind=kint)      :: PEsmptTOT
integer(kind=kint)      :: my_rank
integer(kind=kint)      :: errnof
integer(kind=kint)      :: n_subdomain
integer(kind=kint)      :: n_neighbor_pe
integer(kind=kint), pointer :: neighbor_pe(:)
integer(kind=kint), pointer :: import_index(:)
integer(kind=kint), pointer :: import_item(:)
integer(kind=kint), pointer :: export_index(:)
integer(kind=kint), pointer :: export_item(:)
integer(kind=kint), pointer :: shared_index(:)
integer(kind=kint), pointer :: shared_item(:)

```

| 変数名           | 配列要素数                       | 内容                      |
|---------------|-----------------------------|-------------------------|
| MPI_COMM      |                             | MPI 用コミュニケーター           |
| zero          |                             | 領域番号=0 であれば「1」、それ以外は「0」 |
| PETOT         |                             | 総領域数                    |
| PEsmptTOT     |                             | SMP ノードあたりの PE 数        |
| my_rank       |                             | プロセス番号                  |
| errnof        |                             | エラーID (FORTRAN でのみ使用)   |
| n_subdomain   |                             | 総領域数 (局所分散データからの読み込み)   |
| n_neighbor_pe |                             | 隣接領域数                   |
| neighbor_pe   | n_neighbor_pe               | 隣接領域 ID                 |
| import_index  | 0: n_neighbor_pe            | 受信テーブル用一次元インデックス        |
| import_item   | import_index(n_neighbor_pe) | 受信テーブル用配列               |
| export_index  | 0: n_neighbor_pe            | 送信テーブル用一次元インデックス        |
| export_item   | export_index(n_neighbor_pe) | 送信テーブル用配列               |
| shared_index  | 0: n_neighbor_pe            | 送受信テーブル用一次元インデックス       |
| shared_item   | shared_index(n_neighbor_pe) | 送受信テーブル用配列              |

## (5) 階層構造

```
integer(kind=kint)      :: coarse_grid_level
integer(kind=kint)      :: n_adapt
integer(kind=kint), pointer :: when_i_was_refined_node(:)
integer(kind=kint), pointer :: when_i_was_refined_elem(:)
integer(kind=kint), pointer :: adapt_parent_type(:)
integer(kind=kint), pointer :: adapt_type(:)
integer(kind=kint), pointer :: adapt_level(:)
integer(kind=kint), pointer :: adapt_parent(:)
integer(kind=kint), pointer :: adapt_children_index(:)
integer(kind=kint), pointer :: adapt_children_item(:)
```

| 変数名                     | 配列要素数                          | 内容                        |
|-------------------------|--------------------------------|---------------------------|
| coarse_grid_level       |                                | 最も粗いメッシュのレベル              |
| n_adapt                 |                                | Refinement された回数          |
| when_i_was_refined_node | n_node                         | 各節点の生成された Refinement レベル  |
| when_i_was_refined_elem | n_elem                         | 各要素の生成された Refinement レベル  |
| adapt_parent_type       | n_elem                         | 各要素の親要素の分割タイプ             |
| adapt_type              | n_elem                         | 各要素の分割タイプ                 |
| adapt_level             | n_elem                         | 各要素の分割レベル                 |
| adapt_parent            | 2*n_elem                       | 各要素の親要素 ID (ローカル番号, 所属領域) |
| adapt_children_index    | 0:n_elem                       | 各要素の子要素用一次元インデックス         |
| adapt_children_item     | 2*adapt_children_index(n_elem) | 各要素の子要素 ID (ローカル番号, 所属領域) |

## (6) 下部構造

```
type (hecmwST_section)  :: section
type (hecmwST_material) :: material
type (hecmwST_mpc)      :: mpc
type (hecmwST_amplitude) :: amp
type (hecmwST_node_grp)  :: node_group
type (hecmwST_elem_grp)  :: elem_group
type (hecmwST_surf_grp)  :: surf_group
```

```
end type hecmwST_local_mesh
```

### 5.3. セクション情報

```

type hecmwST_section
  integer(kind=kint)          :: n_sect
  integer(kind=kint), pointer :: sect_type(:)
  integer(kind=kint), pointer :: sect_opt(:)
  integer(kind=kint), pointer :: sect_mat_ID_index(:)
  integer(kind=kint), pointer :: sect_mat_ID_item(:)
  integer(kind=kint), pointer :: sect_I_index(:)
  integer(kind=kint), pointer :: sect_I_item(:)
  integer(kind=kint), pointer :: sect_R_index(:)
  real(kind=kreal), pointer  :: sect_R_item(:)
end type hecmwST_section

```

| 変数名               | 配列要素数                     | 内容                                                        |
|-------------------|---------------------------|-----------------------------------------------------------|
| n_sect            |                           | セクション数                                                    |
| sect_type         | n_sect                    | セクションタイプ<br>(SOLID : 1, SHELL : 2, BEAM : 3, INTERFACE:4) |
| sect_opt          | n_sect                    | SECOPT                                                    |
| sect_mat_ID_index | 0:n_sect                  | 材料物性 ID のための一次元インデックス (COMPOSITE 用)                       |
| sect_mat_ID_item  | sect_mat_ID_index(n_sect) | 材料物性 ID                                                   |
| sect_I_index      | 0:n_sect                  | セクション値用一次元インデックス (整数)                                     |
| sect_I_item       | sect_I_index(n_sect)      | セクション値配列 (整数)                                             |
| sect_R_index      | 0:n_sect                  | セクション値用一次元インデックス (実数)                                     |
| sect_R_item       | sect_R_index(n_sect)      | セクション値配列 (実数)                                             |

## 5.4. 材料物性情報

```

type hecmwST_material
  integer(kind=kint)      :: n_mat
  integer(kind=kint)      :: n_mat_item
  integer(kind=kint)      :: n_mat_subitem
  integer(kind=kint)      :: n_mat_table
  character(HECMW_NAME_LEN), pointer :: mat_name(:)
  integer(kind=kint), pointer :: mat_item_index(:)
  integer(kind=kint), pointer :: mat_subitem_index(:)
  integer(kind=kint), pointer :: mat_table_index(:)
  real(kind=kreal), pointer :: mat_val(:)
  real(kind=kreal), pointer :: mat_temp(:)
end type hecmwST_material

```

| 変数名               | 配列要素数                          | 内容                |
|-------------------|--------------------------------|-------------------|
| n_mat             |                                | 材料数               |
| n_mat_item        |                                | 材料物性総数            |
| n_mat_subitem     |                                | 材料物性サブ項目総数        |
| n_mat_table       |                                | 材料物性テーブル総数        |
| mat_name          | n_mat                          | 材料物性名             |
| mat_item_index    | 0:n_mat                        | 材料数一次元インデックス      |
| mat_subitem_index | 0:n_mat_item                   | 材料物性数一次元インデックス    |
| mat_table_index   | 0:n_mat_subitem                | 材料物性テーブル一次元インデックス |
| mat_val           | mat_table_index(n_mat_subitem) | 材料物性              |
| mat_temp          | mat_table_index(n_mat_subitem) | 温度依存テーブル          |



## 5.5. 拘束グループ情報

```

type hecmwST_mpc
  integer(kind=kint)      :: n_mpc
  integer(kind=kint),pointer :: mpc_index(:)
  integer(kind=kint),pointer :: mpc_item(:)
  integer(kind=kint),pointer :: mpc_dof(:)
  real(kind=kreal),pointer  :: mpc_val(:)
end type hecmwST_mpc

```

| 変数名       | 配列要素数            | 内容               |
|-----------|------------------|------------------|
| n_mpc     |                  | 拘束グループ数          |
| mpc_index | 0:n_mpc          | 拘束グループ用一次元インデックス |
| mpc_item  | mpc_index(n_mpc) | 拘束グループ節点番号       |
| mpc_dof   | mpc_index(n_mpc) | 拘束自由度情報          |
| mpc_val   | mpc_index(n_mpc) | 拘束自由度係数          |

## 5.6. AMPLITUDE 情報

```

type hecmwST_amplitude
  integer(kind=kint)      :: n_amp
  character(len=HECMW_NAME_LEN),pointer :: amp_name(:)
  integer(kind=kint),pointer :: amp_type_definition(:)
  integer(kind=kint),pointer :: amp_type_time(:)
  integer(kind=kint),pointer :: amp_type_value(:)
  integer(kind=kint),pointer :: amp_index(:)
  real(kind=kreal),pointer  :: amp_val(:)
  real(kind=kreal),pointer  :: amp_table(:)
end type hecmwST_amplitude

```

| 変数名                 | 配列要素数            | 内容                                            |
|---------------------|------------------|-----------------------------------------------|
| n_amp               |                  | AMPLITUDE グループ数                               |
| amp_name            | n_amp            | AMPLITUDE グループ名                               |
| amp_type_definition | n_amp            | AMPLITUDE タイプ (TABLAR : 1)                    |
| amp_type_time       | n_amp            | AMPLITUDE タイプ (STEP TIME : 1)                 |
| amp_type_value      | n_amp            | AMPLITUDE タイプ<br>(RELATIVE : 1, ABSOLUTE : 2) |
| amp_index           | 0:n_amp          | AMPLITUDE インデックス                              |
| amp_val             | amp_index(n_amp) | AMPLITUDE 値                                   |
| amp_table           | amp_index(n_amp) | AMPLITUDE 時間                                  |

## 5.7. グループ情報（節点）

```

type hecmwST_node_grp
  integer(kind=kint)      :: n_grp
  integer(kind=kint)      :: n_bc
  character(HECMW_NAME_LEN), pointer :: grp_name(:)
  integer(kind=kint), pointer :: grp_index(:)
  integer(kind=kint), pointer :: grp_item(:)
  integer(kind=kint), pointer :: bc_grp_ID(:)
  integer(kind=kint), pointer :: bc_grp_type(:)
  integer(kind=kint), pointer :: bc_grp_index(:)
  integer(kind=kint), pointer :: bc_grp_dof(:)
  real(kind=kreal), pointer :: bc_grp_val(:)
end type hecmwST_node_grp

```

| 変数名          | 配列要素数            | 内容                                             |
|--------------|------------------|------------------------------------------------|
| n_grp        |                  | グループ数                                          |
| grp_name     | n_grp            | グループ名                                          |
| grp_index    | 0:n_grp          | グループ要素用一次元インデックス                               |
| grp_item     | grp_index(n_grp) | グループ要素用配列                                      |
| n_bc         |                  | 境界条件設定節点数（自由度数）                                |
| bc_grp_ID    | n_bc             | 所属節点グループ番号                                     |
| bc_grp_type  | n_bc             | 境界条件タイプ, =1 : 変位, =2 : Flux<br>負の場合はユーザーサブルーチン |
| bc_grp_index | n_bc             | 境界条件設定節点番号                                     |
| bc_grp_dof   | n_bc             | 境界条件設定自由度                                      |
| bc_grp_val   | n_bc             | 境界条件値                                          |

## 5.8. グループ情報（要素）

```

type hecmwST_elem_grp
  integer(kind=kint)      :: n_grp
  integer(kind=kint)      :: n_bc
  character(HECMW_NAME_LEN), pointer :: grp_name(:)
  integer(kind=kint), pointer :: grp_index(:)
  integer(kind=kint), pointer :: grp_item(:)
  integer(kind=kint), pointer :: bc_grp_ID(:)
  integer(kind=kint), pointer :: bc_grp_type(:)
  integer(kind=kint), pointer :: bc_grp_index(:)
  real(kind=kreal), pointer :: bc_grp_val(:)
end type hecmwST_elem_grp

```

| 変数名          | 配列要素数            | 内容                                             |
|--------------|------------------|------------------------------------------------|
| n_grp        |                  | グループ数                                          |
| grp_name     | n_grp            | グループ名                                          |
| grp_index    | 0:n_grp          | グループ要素用一次元インデックス                               |
| grp_item     | grp_index(n_grp) | グループ要素用配列                                      |
| n_bc         |                  | 境界条件設定要素数                                      |
| bc_grp_ID    | n_bc             | 所属要素グループ番号                                     |
| bc_grp_type  | n_bc             | 境界条件タイプ, =1 : 変位, =2 : Flux<br>負の場合はユーザーサブルーチン |
| bc_grp_index | n_bc             | 境界条件設定要素番号                                     |
| bc_grp_val   | n_bc             | 境界条件値                                          |

## 5.9. グループ情報（面）

```

type hecmwST_surf_grp
  integer(kind=kint)      :: n_grp
  integer(kind=kint)      :: n_bc
  character(HECMW_NAME_LEN), pointer :: grp_name(:)
  integer(kind=kint), pointer :: grp_index(:)
  integer(kind=kint), pointer :: grp_item(:)
  integer(kind=kint), pointer :: bc_grp_ID(:)
  integer(kind=kint), pointer :: bc_grp_type(:)
  integer(kind=kint), pointer :: bc_grp_index(:)
  real(kind=kreal), pointer :: bc_grp_val(:)
end type hecmwST_surf_grp

```

| 変数名          | 配列要素数              | 内容                                                                          |
|--------------|--------------------|-----------------------------------------------------------------------------|
| n_grp        |                    | 面グループ数                                                                      |
| grp_name     | n_grp              | 面グループ名                                                                      |
| grp_index    | 0:n_grp            | 面グループ要素用一次元インデックス                                                           |
| grp_item     | 2*grp_index(n_grp) | 面グループ要素用配列（要素，局所面番号）<br>grp_item(2*k-1)：要素番号<br>grp_item(2*k )：局所面番号        |
| n_bc         |                    | 境界条件設定要素数（自由度数）                                                             |
| bc_grp_ID    | n_bc               | 所属要素グループ番号                                                                  |
| bc_grp_type  | n_bc               | 境界条件タイプ，=1：変位，=2：<br>Flux 負の場合はユーザーサブルーチン                                   |
| bc_grp_index | 2*n_bc             | 境界条件設定面番号（要素，局所面番号）<br>bc_grp_index(2*k-1)：要素番号<br>bc_grp_index(2*k )：局所面番号 |
| bc_grp_val   | n_bc               | 境界条件値                                                                       |

```

end module hecmw_util

```

## 6. 結果データ

### 6.1. 結果データ構造体

```
type hecmwST_result_data
  integer(kind=kint) :: nn_component
  integer(kind=kint) :: ne_component
  integer(kind=kint), pointer :: nn_dof(:)
  integer(kind=kint), pointer :: ne_dof(:)
  character(len=HECMW_NAME_LEN), pointer :: node_label(:)
  character(len=HECMW_NAME_LEN), pointer :: elem_label(:)
  real(kind=kreal), pointer :: node_val_item(:)
  real(kind=kreal), pointer :: elem_val_item(:)
end type hecmwST_result_data
```

| 変数名           | 内容                                    |
|---------------|---------------------------------------|
| nn_component  | 節点コンポーネント数                            |
| ne_component  | 要素コンポーネント数                            |
| nn_dof        | 節点自由度数                                |
| ne_dof        | 要素自由度数                                |
| node_label    | 節点ラベル                                 |
| elem_label    | 要素ラベル                                 |
| node_val_item | 節点値<br>値の並びは、節点ごとにその節点の全コンポーネントが格納される |
| elem_val_item | 要素値<br>値の並びは、要素ごとにその要素の全コンポーネントが格納される |

## 6.2. 結果ファイルフォーマット

```
header
n_node n_elem
nn_component ne_component
nn_dof(1) nn_dof(2) ... nn_dof(nn_comonent)
node_label(1)
node_label(2)
...
node_label(nn_component)
node_global_ID(1)
node_val_item(1) node_val_item(2) ... node_val_item(sum(nn_dof))
node_global_ID(2)
...
ne_dof(1) ne_dof(2) ... ne_dof(ne_comonent)
elem_label(1)
elem_label(2)
...
elem_label(ne_component)
elem_global_ID(1)
elem_val_item(1) elem_val_item(2) ... elem_val_item(sum(ne_dof))
...
```

ただし,

header : hecmw\_result\_init API で指定した任意の文字列  
n\_node : 分散メッシュ構造体の節点数 n\_node  
n\_elem : 分散メッシュ構造体の要素数 n\_elem

である.

## 7. Fortran API リファレンス

### hecmw\_init

HEC-MW の初期化処理を行います。

```
subroutine hecmw_init()
```

#### 引数

なし

#### 説明

HEC-MW の初期化処理を行います。

これは、プログラムの開始直後に必ず呼び出さねばなりません。

MPI の初期化を行うため、この呼び出し以降、並列処理が可能となります。また、全体制御ファイルが自動的に読み込まれます。

## hecmw\_finalize

HEC-MW の終了処理を行います。

```
subroutine hecmw_finalize
```

### 引数

なし

### 説明

HEC-MW の終了処理を行います。

これは、プログラムの終了直前に呼び出さねばなりません。

MPI の終了処理はこの呼び出しで行われます。



## hecmw\_get\_mesh

メッシュデータをファイルから読み込みます.

```
subroutine hecmw_get_mesh(name_ID, mesh)

character(len=HECMW_NAME_LEN) :: name_ID
type(hecmwST_local_mesh) :: mesh
```

### 引数

name\_ID

!MESH または!MESH GROUP を特定する識別子

mesh

読み込まれたメッシュデータの格納先

### 説明

ファイルからメッシュデータを読み込みます.

この API は, 全体制御ファイルから入力ファイルの情報を取得します.

読み込み可能なメッシュファイルの種類は以下のとおりです.

- HEC-MW 分散メッシュデータ
- HEC-MW 単一領域メッシュデータ
- GeoFEM メッシュデータ

メッシュファイルの種類は全体制御ファイルで指定します.

読み込むメッシュファイルは, 全体制御ファイルの!MESH で定義されており, かつ NAME が name\_ID のものです. !MESH GROUP によってメッシュファイルがグループ化されている場合は, グループ内の全てのメッシュファイルを読み込みます.

読み込まれるメッシュタイプが分散メッシュデータの場合, 実際に読み込むファイルのファイル名は, 全体制御ファイルから取得したファイル名の末尾に「.<ランク番号>」を付加したものとなります.

## hecmw\_dist\_free

分散メッシュデータ構造体に確保されているメモリを解放します.

```
subroutine hecmw_dist_free(mesh)

type(hecmwST_local_mesh) :: mesh
```

### 引数

mesh

解放する分散メッシュデータ構造体

### 説明

分散メッシュデータ構造体に確保されているメモリを解放します.

## hecmw\_put\_mesh

メッシュデータをファイルに出力します.

```
subroutine hecmw_put_mesh(name_ID, mesh)

character(len=HECMW_NAME_LEN) :: name_ID
type(hecmwST_local_mesh) :: mesh
```

### 引数

name\_ID

!MESH を特定する識別子

mesh

出力するメッシュデータ

### 説明

メッシュデータをファイルに出力します.

出力対象となるメッシュデータは、引数 **mesh** に格納されているデータで、出力ファイルの種類は分散メッシュデータとなります.

出力されるファイルは、全体制御ファイルの**!MESH** で定義されており、かつ **NAME** が **name\_ID** のものです.

出力されるファイルのファイル名は、全体制御ファイルから取得したファイル名の末尾に「.<ランク番号>」を付加したものととなります.

## hecmw\_result\_init

結果ファイル出力の初期化処理を行います.

```
subroutine hecmw_result_init(mesh, tstep, header)

type(hecmwST_local_mesh) :: mesh
integer(kind=kint) :: tstep
character(len=HECMW_HEADER_LEN) :: header
```

### 引数

mesh

メッシュデータ

tstep

タイムステップ

header

ヘッダ

### 説明

結果ファイル出力の初期化処理を行います.

これにより、結果ファイル出力のために必要な情報を取得します. ただし, `header` は結果ファイルにコメントとして用いられるだけで, 何ら影響を与えません.

## hecmw\_result\_add

結果ファイルに出力するデータを指定します.

```
subroutine hecmw_result_add(node_or_elem, n_dof, label, data)

integer(kind=kint) :: node_or_elem
integer(kind=kint) :: n_dof
character(len=HECMW_NAME_LEN) :: label
real(kind=kreal) :: data
```

### 引数

node\_or\_elem

指定する値が節点値なのか要素値なのかを示す

1:節点 2:要素

n\_dof

自由度数

label

ラベル

data

結果データ

### 説明

結果ファイルに出力するデータを指定します.

これは、複数回呼び出すことが可能です. この呼び出しによって指定されたデータの情報は、一旦 HEC-MW の内部に蓄えられます. 蓄えられたデータは、hecmw\_result\_write または hecmw\_result\_write\_by\_name によって出力されます.

この呼び出し以前に、hecmw\_result\_init によって初期化が行われていなければなりません.

## hecmw\_result\_write

結果データをファイルへ出力します.

```
subroutine hecmw_result_write()
```

### 引数

なし

### 説明

結果データをファイルへ出力します.

出力されるデータは, `hecmw_result_add` で指定されたデータです.

出力されるファイルは, 全体制御ファイルの `!RESULT` で定義されており, `IO=OUT` かつ全体制御ファイル内で最初に定義されているファイルです.

出力されるファイルのファイル名は, 全体制御ファイルから取得したファイル名の末尾に「.<ランク番号>.<tstep>」を付加したものとなります.

## hecmw\_result\_write\_by\_name

結果データをファイルへ出力します.

```
subroutine hecmw_result_write_by_name(name_ID)

character(len=HECMW_NAME_LEN) :: name_ID
```

### 引数

name\_ID

!RESULT を特定する識別子

### 説明

結果データをファイルへ出力します.

出力ファイルは, 全体制御ファイルで指定された!RESULT のうち, NAME が name\_ID のものです. この場合, !RESULT の IO パラメータは無視されます.

出力されるファイルのファイル名は, 全体制御ファイルから取得したファイル名の末尾に「.<ランク番号>.<tstep>」を付加したものとなります.

ファイル名の取得方法以外は, hecmw\_result\_write と同等です.

## hecmw\_result\_write\_st

結果データをファイルへ出力します.

```
subroutine hecmw_result_write_st(result_data, n_node, n_elem, timestep,
header)

type(hecmwST_result_data)::result_data
integer(kind=kint)::n_node,n_elem,timestep
character(len=HECMW_HEADER_LEN)::header
```

### 引数

|             |           |
|-------------|-----------|
| result_data | 結果データ構造体  |
| n_node      | 節点数       |
| n_elem      | 要素数       |
| timestep    | タイムステップ   |
| header      | 結果ファイルヘッダ |

### 説明

結果データをファイルへ出力します.

出力されるデータは, **result\_data** で指定されたデータです.

出力されるファイルは, 全体制御ファイルの**!RESULT** で定義されており, **IO=OUT** かつ全体制御ファイル内で最初に定義されているファイルです.

出力されるファイルのファイル名は, 全体制御ファイルから取得したファイル名の末尾に「.<ランク番号>.<timestep>」を付加したものとなります.



## hecmw\_result\_write\_st\_by\_name

結果データをファイルへ出力します.

```
subroutine    hecmw_result_write_st_by_name(name_ID,    result_data,
n_node, n_elem, tstep, header)

character(len=HECMW_NAME_LEN) :: name_ID
type(hecmwST_result_data)::result_data
integer(kind=kint)::n_node,n_elem,tstep
character(len=HECMW_HEADER_LEN)::header
```

### 引数

name\_ID

!RESULT を特定する識別子

result\_data

結果データ構造体

n\_node

節点数

n\_elem

要素数

tstep

タイムステップ

header

結果ファイルヘッダ

### 説明

引数 **result\_data** の結果データをファイルへ出力します.

出力ファイルは, 全体制御ファイルで指定された!RESULT のうち, NAME が **name\_ID** のものです. この場合, !RESULT の IO パラメータは無視されます.

出力されるファイルのファイル名は, 全体制御ファイルから取得したファイル名の末尾に「.<ランク番号>.<tstep>」を付加したものとなります.

## hecmw\_result\_finalize

結果データ出力の後処理を行います.

```
subroutine hecmw_result_finalize()
```

### 引数

なし

### 説明

hecmw\_result\_add で指定された結果データの登録をクリアします.

## hecmw\_result\_read

結果ファイルから結果データを入力します.

```
subroutine hecmw_result_read(tstep, result)

integer(kind=kint) :: tstep
type(hecmwST_result_data) :: result
```

### 引数

tstep

タイムステップ

result

結果データ格納用構造体

### 説明

結果ファイル内の結果データが読み込まれ, **result** に格納されます.

入力されるファイルは, 全体制御ファイルの **!RESULT** で定義されており, **IO=IN** かつ全体制御ファイル内で最初に定義されているファイルです.

入力されるファイルのファイル名は, 全体制御ファイルから取得したファイル名の末尾に「.<ランク番号>.<tstep>」を付加したものとなります.

## hecmw\_result\_read\_by\_name

結果ファイルから結果データを入力します.

```
subroutine hecmw_result_read_by_name(name_ID, tstep, result)

character(len=HECMW_NAME_LEN) :: name_ID
integer(kind=kint) :: tstep
type(hecmwST_result_data) :: result
```

### 引数

name\_ID

!RESULT を特定する識別子

tstep

タイムステップ

result

結果データ格納用構造体

### 説明

結果ファイル内の結果データが読み込まれ, result に格納されます.

入力ファイルは, 全体制御ファイルで指定された!RESULT のうち, NAME が name\_ID のものです. この場合, !RESULT の IO パラメータは無視されます.

ファイル名の取得方法以外は, hecmw\_result\_read と同等です.

## hecmw\_restart\_add\_int

リスタートファイルに出力するデータを指定します.

```
subroutine hecmw_restart_add_int(data, n_data)

integer(kind=kint),dimension(:) :: data
integer(kind=kint) :: n_data
```

### 引数

data

リスタートデータ (整数型一次元配列)

n\_data

配列要素数

### 説明

リスタートファイルに出力するデータを指定します.

これは、複数回呼び出すことが可能です. この呼び出しによって指定されたデータの情報は、一旦 HEC-MW の内部に蓄えられます. 蓄えられたデータは、hecmw\_restart\_write または hecmw\_restart\_write\_by\_name によって出力されます. したがって、実際に出力が完了するまでデータを変更してはなりません.

## hecmw\_restart\_add\_real

リスタートファイルに出力するデータを指定します.

```
subroutine hecmw_restart_add_int(data, n_data)

integer(kind=kint),dimension(:) :: data
integer(kind=kint) :: n_data
```

### 引数

data

リスタートデータ（浮動小数点型一次元配列）

n\_data

配列要素数

### 説明

引数の型が浮動小数点型一次元配列であること意外は, hecmw\_restart\_add\_real と同等です.

## hecmw\_restart\_write

リスタートデータをファイルへ出力します.

```
subroutine hecmw_restart_write()
```

### 引数

なし

### 説明

リスタートデータをファイルへ出力します.

出力されるデータは, hecmw\_restart\_add\_int または hecmw\_restart\_real で指定されたデータです.

出力されるファイルは, 全体制御ファイルの!RESTART で定義されており, IO=OUT または IO=INOUT, かつ全体制御ファイル内で最初に定義されているファイルです.

出力されるファイルのファイル名は, 全体制御ファイルから取得したファイル名の末尾に「.<ランク番号>」を付加したものとなります.



## hecmw\_restart\_write\_by\_name

リスタートデータをファイルへ出力します.

```
subroutine hecmw_restart_write_by_name(name_ID)

character(len=HECMW_NAME_LEN) :: name_ID
```

### 引数

name\_ID

!RESTART を特定する識別子

### 説明

リスタートデータをファイルへ出力します.

出力ファイルは, 全体制御ファイルで指定された!RESTART のうち, NAME が name\_ID のものです. この場合, !RESTART の IO パラメータは無視されます.

出力されるファイルのファイル名は, 全体制御ファイルから取得したファイル名の末尾に「.<ランク番号>」を付加したものとなります.

ファイル名の取得方法以外は, hecmw\_restart\_write と同等です.

## hecmw\_restart\_open

リスタートファイルを入力用にオープンします.

```
hecmw_restart_open()
```

### 引数

なし

### 説明

リスタートファイルを入力用にオープンします.

オープンされるファイルは、全体制御ファイルの!RESTART で定義されており, IO=IN または IO=INOUT, かつ全体制御ファイル内で最初に定義されているファイルです.

## hecmw\_restart\_open\_by\_name

リスタートファイルを入力用にオープンします.

```
subroutine hecmw_restart_open_by_name(name_ID)

character(len=HECMW_NAME_LEN) :: name_ID
```

### 引数

name\_ID

!RESTART を特定する識別子

### 説明

リスタートファイルを入力用にオープンします.

出力ファイルは、全体制御ファイルで指定された!RESTART のうち、NAME が name\_ID のものです. この場合、!RESTART の IO パラメータは無視されます.

## hecmw\_restart\_read\_int

リスタートデータからデータを入力します.

```
subroutine hecmw_restart_read_int(dst)

integer(kind=kint), dimension(:) :: dst
```

### 引数

dst

リスタートデータ格納先 (整数型一次元配列)

### 説明

リスタートファイル内のデータの一部が読み込まれ, dst に格納されます.

この呼び出し以前に, hecmw\_restart\_open または hecmw\_restart\_open\_by\_name によって入力リスタートファイルがオープンされていなければなりません.

dst には, データ格納に必要な領域を事前に確保しておかなければなりません.

この呼び出しで注意すべきことは, リスタートファイルの入力と出力で整合性がとれていなければならないということです.

リスタートファイルの入力には hecmw\_restart\_write\_int または hecmw\_restart\_write\_real を使用しますが, その順番とそれぞれの出力で出力したデータサイズに入力時もある必要があります. つまり, hecmw\_restart\_write\_int で出力したデータは, hecmw\_restart\_read\_int で入力せねばならず, かつその配列の要素サイズを同じにしておかなければなりません. これは, hecmw\_restart\_write\_real, hecmw\_restart\_read\_real についても同じです.

## hecmw\_restart\_read\_real

リスタートデータからデータを入力します.

```
subroutine hecmw_restart_read_real(dst)

real(kind=kreal),dimension(:) :: dst
```

### 引数

dst

リスタートデータ格納先 (浮動小数点型一次元配列)

### 説明

引数の型が浮動小数点型一次元配列であること意外は, hecmw\_restart\_read\_real と同等です.

## hecmw\_restart\_close

リスタートファイルをクローズします.

```
subroutine hecmw_restart_close()
```

### 引数

なし

### 説明

オープンされているリスタートファイルをクローズします.

## hecmw\_visualize\_init

可視化の初期化処理を行います.

```
subroutine hecmw_visualize_init()
```

### 引数

なし

### 説明

可視化の初期化処理を行います.

## hecmw\_visualize(mesh, result, tstep, max\_step, is\_force)

可視化を行います.

```
subroutine hecmw_visualize(mesh, result, tstep, max_step, is_force)

type(hecmwST_local_mesh) :: mesh
type(hecmwST_result_data) :: result
integer(kind=kint) :: tstep
integer(kind=kint) :: max_step
integer(kind=kint) :: is_force
```

### 引数

mesh

メッシュデータ

result

可視化用結果データ

t step

タイムステップ

max\_step

最大タイムステップ

is\_force

最後のステップも強制的に描くかどうかを示す.

0:描かない 1:描く

### 説明

可視化を行います.

hecmw\_visualize\_init によって事前に初期化されている必要があります.

可視化に必要な結果データには **result**, メッシュには **mesh** が使用されます.



## hecmw\_visualize\_finalize

可視化の後処理を行います.

```
subroutine hecmw_visualize_finalize
```

### 引数

なし

### 説明

可視化の後処理を行います.

## hecmw\_ctrl\_get\_control\_file

制御ファイル名を取得します.

```
subroutine hecmw_ctrl_get_control_file(name_ID, filename)

character(len=HECMW_NAME_LEN) :: name_ID
character(len=HECMW_FILENAME_LEN) :: filename
```

### 引数

name\_ID

!CONTROL を特定する識別子

filename

制御ファイル名格納先

### 説明

全体制御ファイルの!CONTROL で定義した制御ファイル名を取得します.

## 8. C API リファレンス

### 8.1. データ構造一覧

以下にデータ構造の一覧を示す.

|                                                                                               |     |
|-----------------------------------------------------------------------------------------------|-----|
| hecmw_bit_array (ビット配列構造体 ) .....                                                             | 97  |
| hecmw_coord (座標を表す構造体 ) .....                                                                 | 99  |
| hecmw_ctrl_meshfile (全体制御ファイルから取得したメッシュファイルの情報を格納する )<br>.....                                | 101 |
| hecmw_ctrl_meshfiles (メッシュ情報構造体 ) .....                                                       | 103 |
| hecmw_io_amplitude (AMPLITUDE情報 ) .....                                                       | 105 |
| hecmw_io_amplitude::hecmw_io_amplitude_item (AMPLITUDEアイテム ) .....                            | 107 |
| hecmw_io_egrp (要素グループ情報 ) .....                                                               | 109 |
| hecmw_io_elem_surf (面グループアイテム ) .....                                                         | 110 |
| hecmw_io_element (要素情報 ) .....                                                                | 111 |
| hecmw_io_header (ヘッダ情報 ) .....                                                                | 113 |
| hecmw_io_id (Int型IDの単方向リンクリストを表す ) .....                                                      | 114 |
| hecmw_io_id_array (Int型IDの配列を表す ) .....                                                       | 115 |
| hecmw_io_initial (初期条件情報 ) .....                                                              | 116 |
| hecmw_io_material (材料情報 ) .....                                                               | 118 |
| hecmw_io_material::hecmw_io_matitem (材料ITEM ) .....                                           | 120 |
| hecmw_io_material::hecmw_io_matitem::hecmw_io_matsubitem (材料SUBITEM ) .....                   | 122 |
| hecmw_io_mpc (拘束グループ情報 ) .....                                                                | 124 |
| hecmw_io_mpc::hecmw_io_mpcitem (拘束グループアイテム ) .....                                            | 126 |
| hecmw_io_ngrp (節点グループ情報 ) .....                                                               | 128 |
| hecmw_io_node (節点情報 ) .....                                                                   | 129 |
| hecmw_io_section (セクション情報 ) .....                                                             | 130 |
| hecmw_io_section::hecmw_io_section_item (セクションアイテム ) .....                                    | 132 |
| hecmw_io_section::hecmw_io_section_item::hecmw_io_section_interface (インタフェースセ<br>クション ) ..... | 134 |
| hecmw_io_section::hecmw_io_section_item::hecmw_io_section_shell (シェルセクション ) ..                | 136 |

|                                                                                     |     |
|-------------------------------------------------------------------------------------|-----|
| <b>hecmw_io_section::hecmw_io_section_item::hecmw_io_section_solid (ソリッドセクション )</b> | 138 |
| <b>hecmw_io_sgrp (面グループ情報 )</b>                                                     | 139 |
| <b>hecmw_io_zero (絶対零度情報 )</b>                                                      | 140 |
| <b>hecmw_map_int_value (マップの整数キーと値のペアを格納する )</b>                                    | 141 |
| <b>hecmw_map_int_pair (マップの整数キーと内部インデックスのペアを格納する )</b>                              | 143 |
| <b>hecmw_map_int (整数キーとデータのマップ構造体 )</b>                                             | 145 |
| <b>hecmw_msgent (HEC-MWメッセージ情報構造体 )</b>                                             | 148 |
| <b>hecmw_set_int (整数データの集合構造体 )</b>                                                 | 150 |
| <b>hecmw_system_param (座標変換パラメータ )</b>                                              | 153 |
| <b>hecmwST_amplitude (AMPLITUDE情報構造体 )</b>                                          | 155 |
| <b>hecmwST_elem_grp (要素グループ情報構造体 )</b>                                              | 159 |
| <b>hecmwST_local_mesh (メッシュデータ構造体 )</b>                                             | 163 |
| <b>hecmwST_material (材料情報構造体 )</b>                                                  | 183 |
| <b>hecmwST_mpc (拘束グループ情報構造体 )</b>                                                   | 187 |
| <b>hecmwST_node_grp (節点グループ情報構造体 )</b>                                              | 189 |
| <b>hecmwST_result_data (結果データ構造体 )</b>                                              | 193 |
| <b>hecmwST_section (セクション情報構造体 )</b>                                                | 196 |
| <b>hecmwST_surf_grp (面グループ情報構造体 )</b>                                               | 200 |

## 8.2. HEC-MW データ構造

### 構造体 `hecmw_bit_array`

ビット配列構造体

```
#include <hecmw_bit_array.h>
```

#### 変数

- `int len`  
*配列の長さ*
- `unsigned long * vals`  
*ビット配列を格納する配列*

---

#### 説明

ビット配列構造体

---

#### 構造体

`int hecmw_bit_array::len`

*配列の長さ*

`unsigned long* hecmw_bit_array::vals`

ビット配列を格納する配列

---

この構造体の説明は次のファイルから生成されました:

- **hecmw\_bit\_array.h**

## 構造体 hecmw\_coord

座標を表す構造体

```
#include <hecmw_geometric.h>
```

### 変数

- double **x**  
*x座標値*
- double **y**  
*y座標値*
- double **z**  
*z座標値*

---

### 説明

座標を表す構造体

---

### 構造体

**double hecmw\_coord::x**

*x座標値*

**double hecmw\_coord::y**

y座標値

**double hecmw\_coord::z**

z座標値

---

この構造体の説明は次のファイルから生成されました:

- **hecmw\_geometric.h**



## 構造体 `hecmw_ctrl_meshfile`

全体制御ファイルから取得したメッシュファイルの情報を格納する

```
#include <hecmw_control.h>
```

### 変数

- `int type`  
メッシュの種類(!*MESH*の*TYPE*)
- `int io`  
メッシュの入出力属性(!*MESH*の*IO*パラメータ)
- `char * filename`  
メッシュのファイル名 (パスを含む)

---

### 説明

全体制御ファイルから取得したメッシュファイルの情報を格納する

一つのメッシュ情報を格納する

---

### 構造体

`int hecmw_ctrl_meshfile::type`

メッシュの種類(!*MESH*の*TYPE*)

**int hecmw\_ctrl\_meshfile::io**

メッシュの入出力属性(!MESHのIOパラメータ)

**char\* hecmw\_ctrl\_meshfile::filename**

メッシュのファイル名 (パスを含む)

---

この構造体の説明は次のファイルから生成されました:

- **hecmw\_control.h**

## 構造体 hecmw\_ctrl\_meshfiles

メッシュ情報構造体

```
#include <hecmw_control.h>
```

### 変数

- **int n\_mesh**  
この構造体に含まれるメッシュ情報の個数
- **hecmw\_ctrl\_meshfile \* meshfiles**  
メッシュ情報格納先

---

### 説明

メッシュ情報構造体

全体制御ファイルから取得したメッシュファイルの情報を格納する 複数のメッシュ情報を格納することができる

---

### 構造体

```
int hecmw_ctrl_meshfiles::n_mesh
```

この構造体に含まれるメッシュ情報の個数

```
struct hecmw_ctrl_meshfile* hecmw_ctrl_meshfiles::meshfiles
```

メッシュ情報格納先

meshfiles[0] ... meshfiles[n\_mesh-1]

---

この構造体の説明は次のファイルから生成されました:

- **hecmw\_control.h**

## 構造体 hecmw\_io\_amplitude

AMPLITUDE情報.

```
#include <hecmw_io_struct.h>
```

### 変数

- char **name** [HECMW\_NAME\_LEN+1]
  - int **type\_def**
  - int **type\_time**
  - int **type\_val**
  - **hecmw\_io\_amplitude::hecmw\_io\_amplitude\_item \* item**  
*AMPLITUDE アイテム.*
  - **hecmw\_io\_amplitude \* next**
- 

### 説明

AMPLITUDE情報.

---

### 構造体

```
char hecmw_io_amplitude::name[HECMW_NAME_LEN+1]
```

```
int hecmw_io_amplitude::type_def
```

```
int hecmw_io_amplitude::type_time
```

```
int hecmw_io_amplitude::type_val
```

```
struct hecmw_io_amplitude::hecmw_io_amplitude_item *  
hecmw_io_amplitude::item
```

AMPLITUDEアイテム.

```
struct hecmw_io_amplitude* hecmw_io_amplitude::next
```

---

この構造体の説明は次のファイルから生成されました:

- `hecmw_io_struct.h`

## 構造体 `hecmw_io_amplitude::hecmw_io_amplitude_item`

AMPLITUDEアイテム.

```
#include <hecmw_io_struct.h>
```

### 変数

- `double val`
  - `double table`
  - `hecmw_io_amplitude_item * next`
- 

### 説明

AMPLITUDEアイテム.

---

### 構造体

```
double hecmw_io_amplitude::hecmw_io_amplitude_item::val
```

```
double hecmw_io_amplitude::hecmw_io_amplitude_item::table
```

```
struct hecmw_io_amplitude_item*  
hecmw_io_amplitude::hecmw_io_amplitude_item::next
```

---

この構造体の説明は次のファイルから生成されました:

- `hecmw_io_struct.h`





## 構造体 hecmw\_io\_egrp

要素グループ情報

```
#include <hecmw_io_struct.h>
```

### 変数

- char **name** [HECMW\_NAME\_LEN+1]
  - hecmw\_set\_int \* **elem**
  - hecmw\_io\_egrp \* **next**
- 

### 説明

要素グループ情報

---

### 構造体

```
char hecmw_io_egrp::name[HECMW_NAME_LEN+1]
```

```
struct hecmw_set_int* hecmw_io_egrp::elem
```

```
struct hecmw_io_egrp* hecmw_io_egrp::next
```

---

この構造体の説明は次のファイルから生成されました:

- hecmw\_io\_struct.h

## 構造体 `hecmw_io_elem_surf`

面グループアイテム

```
#include <hecmw_io_struct.h>
```

### 変数

- `int elem`
  - `int surf`
- 

### 説明

面グループアイテム

---

### 構造体

```
int hecmw_io_elem_surf::elem
```

```
int hecmw_io_elem_surf::surf
```

---

この構造体の説明は次のファイルから生成されました:

- `hecmw_io_struct.h`

## 構造体 hecmw\_io\_element

要素情報

```
#include <hecmw_io_struct.h>
```

### 変数

- int **type**
  - int \* **node**
  - int **nmatitem**
  - double \* **matitem**
  - char **matname** [HECMW\_NAME\_LEN+1]
  - int **mpc\_matid**
  - int **mpc\_sectid**
- 

### 説明

要素情報

---

### 構造体

int hecmw\_io\_element::type

int\* hecmw\_io\_element::node

int hecmw\_io\_element::nmatitem

**double\* hecmw\_io\_element::matitem**

**char hecmw\_io\_element::matname[HECMW\_NAME\_LEN+1]**

**int hecmw\_io\_element::mpc\_matid**

**int hecmw\_io\_element::mpc\_sectid**

---

この構造体の説明は次のファイルから生成されました:

- **hecmw\_io\_struct.h**

## 構造体 `hecmw_io_header`

ヘッダ情報

```
#include <hecmw_io_struct.h>
```

### 変数

- `char header [HECMW_HEADER_LEN+1]`
- 

### 説明

ヘッダ情報

---

### 構造体

```
char hecmw_io_header::header[HECMW_HEADER_LEN+1]
```

---

この構造体の説明は次のファイルから生成されました:

- `hecmw_io_struct.h`

## 構造体 `hecmw_io_id`

`int`型IDの単方向リンクリストを表す

```
#include <hecmw_io_struct.h>
```

### 変数

- `int id`
  - `hecmw_io_id * next`
- 

### 説明

`int`型IDの単方向リンクリストを表す

---

### 構造体

```
int hecmw_io_id::id
```

```
struct hecmw_io_id* hecmw_io_id::next
```

---

この構造体の説明は次のファイルから生成されました:

- `hecmw_io_struct.h`

## 構造体 `hecmw_io_id_array`

`int`型IDの配列を表す

```
#include <hecmw_io_struct.h>
```

### 変数

- `int n`
  - `int * id`
- 

### 説明

`int`型IDの配列を表す

---

### 構造体

`int hecmw_io_id_array::n`

`int* hecmw_io_id_array::id`

---

この構造体の説明は次のファイルから生成されました:

- `hecmw_io_struct.h`

## 構造体 hecmw\_io\_initial

初期条件情報

```
#include <hecmw_io_struct.h>
```

### 変数

- int **type**
  - int **node**
  - char **ngrp** [HECMW\_NAME\_LEN+1]
  - double **val**
  - **hecmw\_io\_initial** \* next
- 

### 説明

初期条件情報

---

### 構造体

**int hecmw\_io\_initial::type**

**int hecmw\_io\_initial::node**

**char hecmw\_io\_initial::ngrp[HECMW\_NAME\_LEN+1]**

**double hecmw\_io\_initial::val**



**struct hecmw\_io\_initial\* hecmw\_io\_initial::next**

---

この構造体の説明は次のファイルから生成されました:

- **hecmw\_io\_struct.h**

## 構造体 hecmw\_io\_material

材料情報

```
#include <hecmw_io_struct.h>
```

### 変数

- char **name** [HECMW\_NAME\_LEN+1]
  - int **nitem**
  - **hecmw\_io\_material::hecmw\_io\_matitem \* item**  
*材料ITEM*
  - **hecmw\_io\_material \* next**
- 

### 説明

材料情報

---

### 構造体

```
char hecmw_io_material::name[HECMW_NAME_LEN+1]
```

```
int hecmw_io_material::nitem
```

```
struct hecmw_io_material::hecmw_io_matitem * hecmw_io_material::item
```

*材料ITEM*

**struct hecmw\_io\_material\* hecmw\_io\_material::next**

---

この構造体の説明は次のファイルから生成されました:

- **hecmw\_io\_struct.h**

## 構造体 hecmw\_io\_material::hecmw\_io\_matitem

材料ITEM

```
#include <hecmw_io_struct.h>
```

### 変数

- int **item**
- int **nval**
- hecmw\_io\_material::hecmw\_io\_matitem::hecmw\_io\_matsubitem \* **subitem**  
*材料SUBITEM*

---

### 説明

材料ITEM

---

### 構造体

```
int hecmw_io_material::hecmw_io_matitem::item
```

```
int hecmw_io_material::hecmw_io_matitem::nval
```

```
struct hecmw_io_material::hecmw_io_matitem::hecmw_io_matsubitem *  
hecmw_io_material::hecmw_io_matitem::subitem
```

材料SUBITEM

---

この構造体の説明は次のファイルから生成されました:

- **hecmw\_io\_struct.h**

## 構造体

**hecmw\_io\_material::hecmw\_io\_matitem::hecmw\_io\_matsubitem**

材料SUBITEM

```
#include <hecmw_io_struct.h>
```

## 変数

- **double \* val**
  - **double temp**
  - **hecmw\_io\_matsubitem \* next**
- 

## 説明

材料SUBITEM

---

## 構造体

**double\* hecmw\_io\_material::hecmw\_io\_matitem::hecmw\_io\_matsubitem::val**

**double hecmw\_io\_material::hecmw\_io\_matitem::hecmw\_io\_matsubitem::temp**

**struct hecmw\_io\_matsubitem\***

**hecmw\_io\_material::hecmw\_io\_matitem::hecmw\_io\_matsubitem::next**

---

この構造体の説明は次のファイルから生成されました:

- **hecmw\_io\_struct.h**

## 構造体 hecmw\_io\_mpc

拘束グループ情報

```
#include <hecmw_io_struct.h>
```

### 変数

- `int neq`
  - `hecmw_io_mpc::hecmw_io_mpcitem * item`  
*拘束グループアイテム*
  - `hecmw_io_mpc * next`
- 

### 説明

拘束グループ情報

---

### 構造体

```
int hecmw_io_mpc::neq
```

```
struct hecmw_io_mpc::hecmw_io_mpcitem * hecmw_io_mpc::item
```

*拘束グループアイテム*

```
struct hecmw_io_mpc* hecmw_io_mpc::next
```



---

この構造体の説明は次のファイルから生成されました:

- **hecmw\_io\_struct.h**

## 構造体 `hecmw_io_mpc::hecmw_io_mpcitem`

拘束グループアイテム

```
#include <hecmw_io_struct.h>
```

### 変数

- `char ngrp [HECMW_NAME_LEN+1]`
  - `int node`
  - `int dof`
  - `double a`
- 

### 説明

拘束グループアイテム

---

### 構造体

```
char hecmw_io_mpc::hecmw_io_mpcitem::ngrp[HECMW_NAME_LEN+1]
```

```
int hecmw_io_mpc::hecmw_io_mpcitem::node
```

```
int hecmw_io_mpc::hecmw_io_mpcitem::dof
```

```
double hecmw_io_mpc::hecmw_io_mpcitem::a
```

---

この構造体の説明は次のファイルから生成されました:

- **hecmw\_io\_struct.h**

## 構造体 hecmw\_io\_ngrp

節点グループ情報

```
#include <hecmw_io_struct.h>
```

### 変数

- `char name [HECMW_NAME_LEN+1]`
  - `hecmw_set_int * node`
  - `hecmw_io_ngrp * next`
- 

### 説明

節点グループ情報

---

### 構造体

```
char hecmw_io_ngrp::name[HECMW_NAME_LEN+1]
```

```
struct hecmw_set_int* hecmw_io_ngrp::node
```

```
struct hecmw_io_ngrp* hecmw_io_ngrp::next
```

---

この構造体の説明は次のファイルから生成されました:

- `hecmw_io_struct.h`

## 構造体 hecmw\_io\_node

節点情報

```
#include <hecmw_io_struct.h>
```

### 変数

- double **x**
  - double **y**
  - double **z**
- 

### 説明

節点情報

---

### 構造体

**double hecmw\_io\_node::x**

**double hecmw\_io\_node::y**

**double hecmw\_io\_node::z**

---

この構造体の説明は次のファイルから生成されました:

- **hecmw\_io\_struct.h**

## 構造体 hecmw\_io\_section

セクション情報

```
#include <hecmw_io_struct.h>
```

### 変数

- char **egrp** [HECMW\_NAME\_LEN+1]
  - char **material** [HECMW\_NAME\_LEN+1]
  - int **composite**
  - int **secopt**
  - int **type**
  - **hecmw\_io\_section::hecmw\_io\_section\_item** sect  
セクションアイテム
  - **hecmw\_io\_section** \* next
- 

### 説明

セクション情報

---

### 構造体

```
char hecmw_io_section::egrp[HECMW_NAME_LEN+1]
```

```
char hecmw_io_section::material[HECMW_NAME_LEN+1]
```

```
int hecmw_io_section::composite
```

**int hecmw\_io\_section::secopt**

**int hecmw\_io\_section::type**

**union hecmw\_io\_section::hecmw\_io\_section\_item hecmw\_io\_section::sect**

セクションアイテム

**struct hecmw\_io\_section\* hecmw\_io\_section::next**

---

この構造体の説明は次のファイルから生成されました:

- **hecmw\_io\_struct.h**

## 共用体 `hecmw_io_section::hecmw_io_section_item`

セクションアイテム

```
#include <hecmw_io_struct.h>
```

### 変数

- `hecmw_io_section::hecmw_io_section_item::hecmw_io_section_solid solid`  
ソリッドセクション
- `hecmw_io_section::hecmw_io_section_item::hecmw_io_section_shell shell`  
シェルセクション
- `hecmw_io_section::hecmw_io_section_item::hecmw_io_section_interface interface`  
インタフェースセクション

---

### 説明

セクションアイテム

---

### 構造体

```
struct hecmw_io_section::hecmw_io_section_item::hecmw_io_section_solid  
hecmw_io_section::hecmw_io_section_item::solid
```

ソリッドセクション



```
struct hecmw_io_section::hecmw_io_section_item::hecmw_io_section_shell  
hecmw_io_section::hecmw_io_section_item::shell
```

シェルセクション

```
struct hecmw_io_section::hecmw_io_section_item::hecmw_io_section_interface  
hecmw_io_section::hecmw_io_section_item::interface
```

インタフェースセクション

---

この共用体の説明は次のファイルから生成されました:

- **hecmw\_io\_struct.h**

## 構造体

**hecmw\_io\_section::hecmw\_io\_section\_item::hecmw\_io\_section\_interface**

インタフェースセクション

```
#include <hecmw_io_struct.h>
```

## 変数

- double **thickness**
- double **gapcon**
- double **gaprad1**
- double **gaprad2**

---

## 説明

インタフェースセクション

---

## 構造体

**double**

**hecmw\_io\_section::hecmw\_io\_section\_item::hecmw\_io\_section\_interface::thickness**

**double**

**hecmw\_io\_section::hecmw\_io\_section\_item::hecmw\_io\_section\_interface::gapcon**

**double**

**hecmw\_io\_section::hecmw\_io\_section\_item::hecmw\_io\_section\_interface::gapr  
ad1**

**double**

**hecmw\_io\_section::hecmw\_io\_section\_item::hecmw\_io\_section\_interface::gapr  
ad2**

---

この構造体の説明は次のファイルから生成されました:

- **hecmw\_io\_struct.h**

## 構造体

**hecmw\_io\_section::hecmw\_io\_section\_item::hecmw\_io\_section\_shell**

シェルセクション

```
#include <hecmw_io_struct.h>
```

## 変数

- double **thickness**
  - int **integpoints**
- 

## 説明

シェルセクション

---

## 構造体

**double**

**hecmw\_io\_section::hecmw\_io\_section\_item::hecmw\_io\_section\_shell::thickness**

**int**

**hecmw\_io\_section::hecmw\_io\_section\_item::hecmw\_io\_section\_shell::integpoints**

---

この構造体の説明は次のファイルから生成されました:

- **hecmw\_io\_struct.h**

## 構造体

**hecmw\_io\_section::hecmw\_io\_section\_item::hecmw\_io\_section\_solid**

ソリッドセクション

```
#include <hecmw_io_struct.h>
```

## 変数

- double **thickness**
- 

## 説明

ソリッドセクション

---

## 構造体

**double**

**hecmw\_io\_section::hecmw\_io\_section\_item::hecmw\_io\_section\_solid::thickness**

**s**

---

この構造体の説明は次のファイルから生成されました:

- **hecmw\_io\_struct.h**

## 構造体 hecmw\_io\_sgrp

面グループ情報

```
#include <hecmw_io_struct.h>
```

### 変数

- `char name [HECMW_NAME_LEN+1]`
  - `hecmw_set_int * item`
  - `hecmw_io_sgrp * next`
- 

### 説明

面グループ情報

---

### 構造体

```
char hecmw_io_sgrp::name[HECMW_NAME_LEN+1]
```

```
struct hecmw_set_int* hecmw_io_sgrp::item
```

```
struct hecmw_io_sgrp* hecmw_io_sgrp::next
```

---

この構造体の説明は次のファイルから生成されました:

- `hecmw_io_struct.h`

## 構造体 `hecmw_io_zero`

絶対零度情報

```
#include <hecmw_io_struct.h>
```

### 変数

- `double zero`
- 

### 説明

絶対零度情報

---

### 構造体

`double hecmw_io_zero::zero`

---

この構造体の説明は次のファイルから生成されました:

- `hecmw_io_struct.h`



## 構造体 `hecmw_map_int_value`

マップの整数キーと値のペアを格納する

```
#include <hecmw_map_int.h>
```

### 変数

- `int key`  
キー
- `void * val`  
データ

---

### 説明

マップの整数キーと値のペアを格納する

---

### 構造体

`char* hecmw_map_int_value::key`

キー

`void* hecmw_map_int_value::val`

データ

---

この構造体の説明は次のファイルから生成されました:

- **hecmw\_map\_int.h**

## 構造体 `hecmw_map_int_pair`

マップの整数キーと内部インデックスのペアを格納する

```
#include <hecmw_map_int.h>
```

### 変数

- `int key`  
キー
- `int local`  
内部インデックス

---

### 説明

マップの整数キーと内部インデックスのペアを格納する

---

### 構造体

`char* hecmw_map_int_pair::key`

キー

`void* hecmw_map_int_pair::local`

内部インデックス

---

この構造体の説明は次のファイルから生成されました:

- **hecmw\_map\_int.h**

## 構造体 `hecmw_map_int`

整数キーとデータのマップ構造体

```
#include <hecmw_map_int.h>
```

### 変数

- `int n_val`  
データの個数
- `int max_val`  
確保されているメモリに格納可能なデータの最大個数
- `struct hecmw_map_int_value *vals`  
キーとデータのペアの配列
- `struct hecmw_map_int_pair *pairs`  
キーと内部インデックスのペアの配列
- `int checked`  
キーに重複がないことが確認されていれば1、未確認なら0
- `int sorted`  
`pairs`がキーに関してソートされていれば1、ソートされていなければ0
- `struct hecmw_bit_array *mark`  
データのマーキング用ビット配列
- `int iter`  
データを連続して取り出す際の現在のインデックス

- `void (* freefunc)(void *)`  
データ開放用の関数へのポインタ

---

## 説明

整数キーとデータのマップ構造体

---

## 構造体

`int hecmw_map_int::n_val`

データの個数

`int hecmw_map_int::max_val`

確保されているメモリに格納可能なデータの最大個数

`struct hecmw_map_int_value * hecmw_map_int::vals`

キーとデータのペアの配列

`struct hecmw_map_int_pair * hecmw_map_int::pairs`

キーと内部インデックスのペアの配列

**int hecmw\_map\_int::checked**

キーに重複がないことが確認されていれば1、未確認なら0

**int hecmw\_map\_int::sorted**

pairsがキーに関してソートされていれば1、ソートされていなければ0

**struct hecmw\_bit\_array \* hecmw\_map\_int::mark**

データのマーキング用ビット配列

**int hecmw\_map\_int::iter**

データを連続して取り出す際の現在のインデックス

**void (\*hecmw\_map\_int::freefunc)(void \*)**

データ開放用の関数へのポインタ

---

この構造体の説明は次のファイルから生成されました:

- **hecmw\_map\_int.h**

## 構造体 `hecmw_msgent`

HEC-MWメッセージ情報構造体.

```
#include <hecmw_msg.h>
```

### 変数

- `int msgno`  
メッセージ番号
- `char * msgno_str`  
メッセージ番号の文字列表記
- `char * msg`  
メッセージ文字列

---

### 説明

HEC-MWメッセージ情報構造体.

---

### 構造体

`int hecmw_msgent::msgno`

メッセージ番号

`char* hecmw_msgent::msgno_str`



メッセージ番号の文字列表記

**char\* hecmw\_msgent::msg**

メッセージ文字列

---

この構造体の説明は次のファイルから生成されました:

- **hecmw\_msg.h**

## 構造体 `hecmw_set_int`

整数データの集合構造体

```
#include <hecmw_set_int.h>
```

### 変数

- **`int n_val`**  
データの個数
- **`int max_val`**  
確保されているメモリに格納可能なデータの最大個数
- **`int *vals`**  
データの配列
- **`int checked`**  
データに重複がないことが確認されていれば1、未確認なら0
- **`int sorted`**  
データがソートされていれば1、ソートされていなければ0
- **`int iter`**  
データを連続して取り出す際の現在のインデックス

---

### 説明

整数データの集合構造体

---

## 構造体

**int hecmw\_set\_int::n\_val**

データの個数

**int hecmw\_set\_int::max\_val**

確保されているメモリに格納可能なデータの最大個数

**int \* hecmw\_set\_int::vals**

データの配列

**int hecmw\_set\_int::checked**

データに重複がないことが確認されていれば1、未確認なら0

**int hecmw\_set\_int::sorted**

データがソートされていれば1、ソートされていなければ0

**int hecmw\_set\_int::iter**

データを連続して取り出す際の現在のインデックス

---

この構造体の説明は次のファイルから生成されました:

- **hecmw\_set\_int.h**

## 構造体 `hecmw_system_param`

座標変換パラメータ

```
#include <hecmw_system.h>
```

### 変数

- `double xa`
  - `double ya`
  - `double za`
  - `double xb`
  - `double yb`
  - `double zb`
  - `double xc`
  - `double yc`
  - `double zc`
- 

### 説明

座標変換パラメータ

---

### 構造体

`double hecmw_system_param::xa`

`double hecmw_system_param::ya`

`double hecmw_system_param::za`

**double hecmw\_system\_param::xb**

**double hecmw\_system\_param::yb**

**double hecmw\_system\_param::zb**

**double hecmw\_system\_param::xc**

**double hecmw\_system\_param::yc**

**double hecmw\_system\_param::zc**

---

この構造体の説明は次のファイルから生成されました:

- **hecmw\_system.h**

## 構造体 hecmwST\_amplitude

AMPLITUDE情報構造体.

```
#include <hecmw_struct.h>
```

### 変数

- **int n\_amp**  
*AMPLITUDE グループ数.*
- **char \*\* amp\_name**  
*AMPLITUDE グループ名.*
- **int \* amp\_type\_definition**  
*AMPLITUDE タイプ(DEFINITION).*
- **int \* amp\_type\_time**  
*AMPLITUDE タイプ(TIME).*
- **int \* amp\_type\_value**  
*AMPLITUDE タイプ(VALUE).*
- **int \* amp\_index**  
*AMPLITUDE インデックス.*
- **double \* amp\_val**  
*AMPLITUDE 値.*
- **double \* amp\_table**  
*AMPLITUDE 時間.*

---

## 説明

AMPLITUDE情報構造体.

---

## 構造体

**int hecmwST\_amplitude::n\_amp**

AMPLITUDEグループ数.

**char\*\* hecmwST\_amplitude::amp\_name**

AMPLITUDEグループ名.

サイズ : n\_amp

**int\* hecmwST\_amplitude::amp\_type\_definition**

AMPLITUDEタイプ(DEFINITION).

サイズ : n\_amp

- 1: TABULAR

**int\* hecmwST\_amplitude::amp\_type\_time**

AMPLITUDEタイプ(TIME).

サイズ : n\_amp



- 1:STEP TIME

**int\* hecmwST\_amplitude::amp\_type\_value**

AMPLITUDEタイプ(VALUE).

サイズ : n\_amp

- 1: RELATIVE
- 2: ABSOLUTE

**int\* hecmwST\_amplitude::amp\_index**

AMPLITUDEインデックス.

サイズ : n\_amp+1

**double\* hecmwST\_amplitude::amp\_val**

AMPLITUDE値.

サイズ : amp\_index[n\_amp]

**double\* hecmwST\_amplitude::amp\_table**

AMPLITUDE時間.

サイズ : amp\_index[n\_amp]

---

この構造体の説明は次のファイルから生成されました:

- **hecmw\_struct.h**



## 構造体 hecmwST\_elem\_grp

要素グループ情報構造体

```
#include <hecmw_struct.h>
```

### 変数

- **int n\_grp**  
要素グループ数
- **char \*\* grp\_name**  
要素グループ名
- **int \* grp\_index**  
要素グループ要素用インデックス
- **int \* grp\_item**  
要素グループ要素用配列
- **int n\_bc**  
境界条件設定要素数
- **int \* bc\_grp\_ID**  
所属要素グループ番号
- **int \* bc\_grp\_type**  
境界条件タイプ
- **int \* bc\_grp\_index**  
境界条件設定要素番号

- `double * bc_grp_val`

境界条件値

---

## 説明

要素グループ情報構造体

---

## 構造体

`int hecmwST_elem_grp::n_grp`

要素グループ数

`char** hecmwST_elem_grp::grp_name`

要素グループ名

サイズ : `n_grp`

`int* hecmwST_elem_grp::grp_index`

要素グループ要素用インデックス

サイズ : `n_grp+1`

`int* hecmwST_elem_grp::grp_item`

要素グループ要素用配列

サイズ : `grp_index[n_grp]`

**int hecmwST\_elem\_grp::n\_bc**

境界条件設定要素数

**int\* hecmwST\_elem\_grp::bc\_grp\_ID**

所属要素グループ番号

サイズ : n\_bc

**int\* hecmwST\_elem\_grp::bc\_grp\_type**

境界条件タイプ.

サイズ : n\_bc

- 1:変位
- 2:Flux
- 負:ユーザサブルーチン

**int\* hecmwST\_elem\_grp::bc\_grp\_index**

境界条件設定要素番号

サイズ : n\_bc

**double\* hecmwST\_elem\_grp::bc\_grp\_val**

境界条件値

サイズ : n\_bc

---

この構造体の説明は次のファイルから生成されました:

- **hecmw\_struct.h**

## 構造体 hecmwST\_local\_mesh

メッシュデータ構造体

```
#include <hecmw_struct.h>
```

### 変数

- **int hecmw\_flag\_adapt**  
階層構造使用の有無
- **int hecmw\_flag\_initcon**  
初期条件使用
- **int hecmw\_flag\_parttype**  
領域分割形式
- **int hecmw\_flag\_partdepth**  
部分領域間袖領域のオーバーラップ深さ
- **int hecmw\_flag\_version**  
バージョン
- **char gridfile [HECMW\_FILENAME\_LEN+1]**  
グリッドファイル名
- **int hecmw\_n\_file**  
もろもろのファイル数
- **char \*\* files**  
もろもろのファイル

- char **header** [HECMW\_HEADER\_LEN+1]

ヘッダ

- double **zero\_temp**

絶対零度

- int **n\_node**

総節点数

- int **nn\_internal**

内部節点数

- int \* **node\_internal\_list**

内部節点リスト

- int \* **node\_ID**

節点番号(ローカル番号,所属領域).

- int \* **global\_node\_ID**

グローバル節点番号

- double \* **node**

節点座標.

- int **n\_dof**

節点最大自由度数

- int **n\_dof\_grp**

自由度グループ数

- int \* **node\_dof\_index**



自由度インデックス

- **int \* node\_dof\_item**  
自由度
- **int \* node\_val\_index**  
節点物理量インデックス
- **double \* node\_val\_item**  
節点物理量
- **int \* node\_init\_val\_index**  
初期条件インデックス
- **double \* node\_init\_val\_item**  
初期条件
- **int n\_elem**  
総要素数
- **int ne\_internal**  
内部要素数
- **int \* elem\_internal\_list**  
内部要素リスト
- **int \* elem\_ID**  
要素番号(ローカル番号, 所属領域).
- **int \* global\_elem\_ID**  
グローバル要素番号

- **int \* elem\_type**  
要素タイプ
- **int n\_elem\_type**  
要素タイプの数
- **int \* elem\_type\_index**  
要素タイプのインデックス
- **int \* elem\_type\_item**  
要素タイプ
- **int \* elem\_node\_index**  
要素コネクティビティ用インデックス
- **int \* elem\_node\_item**  
要素コネクティビティ用配列
- **int \* section\_ID**  
セクション番号
- **int \* elem\_mat\_ID\_index**  
材料物性ID用インデックス
- **int \* elem\_mat\_ID\_item**  
材料物性ID配列
- **int n\_elem\_mat\_ID**  
= elem\_mat\_ID\_index[n\_elem]

- **int \* elem\_mat\_int\_index**  
材料物性用インデックス(内部処理用)
- **double \* elem\_mat\_int\_val**  
材料物性用配列
- **int \* elem\_val\_index**  
要素物理量インデックス
- **double \* elem\_val\_item**  
要素物理量
- **int zero**  
領域番号が0か否か
- **HECMW\_Comm HECMW\_COMM**  
MPI コミュニケータ.
- **int PETOT**  
総領域数
- **int PEsmptTOT**  
SMP ノードあたりのPE数.
- **int my\_rank**  
プロセス番号
- **int errnof**  
エラー番号(Fotran でのみ使用)
- **int n\_subdomain**

総領域数(局所分散データからの読み込み)

- **int n\_neighbor\_pe**  
隣接領域数
- **int \* neighbor\_pe**  
隣接領域番号
- **int \* import\_index**  
受信テーブル用インデックス
- **int \* import\_item**  
受信テーブル用配列
- **int \* export\_index**  
送信テーブル用インデックス
- **int \* export\_item**  
送信テーブル用配列
- **int \* shared\_index**  
送受信テーブル用インデックス
- **int \* shared\_item**  
送受信テーブル用配列
- **int coarse\_grid\_level**  
最も荒いメッシュのレベル
- **int n\_adapt**  
Refinementされた回数

- **int \* when\_i\_was\_refined\_node**  
各節点の生成されたRefinement レベル
- **int \* when\_i\_was\_refined\_elem**  
各要素の生成されたRefinement レベル
- **int \* adapt\_parent\_type**  
各要素の親要素の分割タイプ
- **int \* adapt\_type**  
各要素の分割タイプ
- **int \* adapt\_level**  
各要素の分割レベル
- **int \* adapt\_parent**  
各要素の親要素ID(ローカル番号, 所属領域).
- **int \* adapt\_children\_index**  
各要素の子要素用インデックス
- **int \* adapt\_children\_item**
- **hecmwST\_section \* section**  
セクション情報
- **hecmwST\_material \* material**  
材料情報
- **hecmwST\_mpc \* mpc**  
拘束グループ情報

- **hecmwST\_amplitude \* amp**  
*AMPLITUDE情報*
- **hecmwST\_node\_grp \* node\_group**  
*節点グループ情報*
- **hecmwST\_elem\_grp \* elem\_group**  
*要素グループ情報*
- **hecmwST\_surf\_grp \* surf\_group**  
*面グループ情報*

---

## 説明

メッシュデータ構造体

---

## 構造体

**int hecmwST\_local\_mesh::hecmw\_flag\_adapt**

階層構造使用の有無

0:NO, 1:YES

**int hecmwST\_local\_mesh::hecmw\_flag\_initcon**

初期条件使用

0:NO, 1:YES

**int hecmwST\_local\_mesh::hecmw\_flag\_parttype**

領域分割形式

0:Unknown, 1:Node-based, 2:Element-based

**int hecmwST\_local\_mesh::hecmw\_flag\_partdepth**

部分領域間袖領域のオーバーラップ深さ

**int hecmwST\_local\_mesh::hecmw\_flag\_version**

バージョン

**char hecmwST\_local\_mesh::gridfile[HECMW\_FILENAME\_LEN+1]**

グリッドファイル名

**int hecmwST\_local\_mesh::hecmw\_n\_file**

もろもろのファイル数

**char\*\* hecmwST\_local\_mesh::files**

もろもろのファイル

**char hecmwST\_local\_mesh::header[HECMW\_HEADER\_LEN+1]**

ヘッダ

**double hecmwST\_local\_mesh::zero\_temp**

絶対零度

**int hecmwST\_local\_mesh::n\_node**

総節点数

**int hecmwST\_local\_mesh::nn\_internal**

内部節点数

**int\* hecmwST\_local\_mesh::node\_internal\_list**

内部節点リスト

サイズ : nn\_internal

**int\* hecmwST\_local\_mesh::node\_ID**

節点番号(ローカル番号,所属領域).

サイズ : 2\*n\_node

- node\_id[2\*i] : local ID
- node\_id[2\*i+1]: PE

**int\* hecmwST\_local\_mesh::global\_node\_ID**

グローバル節点番号



サイズ : n\_node

**double\* hecmwST\_local\_mesh::node**

節点座標.

サイズ : 3\*n\_node node[3\*i] : X node[3\*i+1]: Y node[3\*i+2]: Z

**int hecmwST\_local\_mesh::n\_dof**

節点最大自由度数

**int hecmwST\_local\_mesh::n\_dof\_grp**

自由度グループ数

**int\* hecmwST\_local\_mesh::node\_dof\_index**

自由度インデックス

サイズ : n\_dof\_grp+1

**int\* hecmwST\_local\_mesh::node\_dof\_item**

自由度

サイズ : n\_dof\_grp

**int\* hecmwST\_local\_mesh::node\_val\_index**

節点物理量インデックス

サイズ : n\_node+1

**double\* hecmwST\_local\_mesh::node\_val\_item**

節点物理量

サイズ : node\_val\_index[n\_node]

**int\* hecmwST\_local\_mesh::node\_init\_val\_index**

初期条件インデックス

サイズ : n\_node+1

**double\* hecmwST\_local\_mesh::node\_init\_val\_item**

初期条件

サイズ : node\_init\_val\_index[n\_node]

**int hecmwST\_local\_mesh::n\_elem**

総要素数

**int hecmwST\_local\_mesh::ne\_internal**

内部要素数

**int\* hecmwST\_local\_mesh::elem\_internal\_list**

内部要素リスト

サイズ : ne\_internal

**int\* hecmwST\_local\_mesh::elem\_ID**

要素番号(ローカル番号, 所属領域).

サイズ :  $2 * n\_elem$

- $elem\_ID[2*i]$  : local ID
- $elem\_ID[2*i+1]$  : PE

**int\* hecmwST\_local\_mesh::global\_elem\_ID**

グローバル要素番号

サイズ :  $n\_elem$

**int\* hecmwST\_local\_mesh::elem\_type**

要素タイプ

サイズ :  $n\_elem$

**int hecmwST\_local\_mesh::n\_elem\_type**

要素タイプの数

**int\* hecmwST\_local\_mesh::elem\_type\_index**

要素タイプのインデックス

サイズ :  $n\_elem\_type+1$

**int\* hecmwST\_local\_mesh::elem\_type\_item**

要素タイプ

サイズ :  $n\_elem\_type$

**int\* hecmwST\_local\_mesh::elem\_node\_index**

要素コネクティビティ用インデックス

サイズ : n\_elem+1

**int\* hecmwST\_local\_mesh::elem\_node\_item**

要素コネクティビティ用配列

サイズ : elem\_node\_index[n\_elem]

**int\* hecmwST\_local\_mesh::section\_ID**

セクション番号

サイズ : n\_elem

**int\* hecmwST\_local\_mesh::elem\_mat\_ID\_index**

材料物性ID用インデックス

サイズ : n\_elem+1

**int\* hecmwST\_local\_mesh::elem\_mat\_ID\_item**

材料物性ID配列

サイズ : elem\_mat\_ID\_index[n\_elem]

**int hecmwST\_local\_mesh::n\_elem\_mat\_ID**

= elem\_mat\_ID\_index[n\_elem]

**int\* hecmwST\_local\_mesh::elem\_mat\_int\_index**

材料物性用インデックス(内部処理用)

サイズ : n\_elem+1

**double\* hecmwST\_local\_mesh::elem\_mat\_int\_val**

材料物性用配列

サイズ : elem\_mat\_int\_index[n\_elem]

**int\* hecmwST\_local\_mesh::elem\_val\_index**

要素物理量インデックス

サイズ : n\_elem+1

**double\* hecmwST\_local\_mesh::elem\_val\_item**

要素物理量

サイズ : elem\_val\_index[n\_elem]

**int hecmwST\_local\_mesh::zero**

領域番号が0か否か

1:領域番号==0, 1:領域番号!=0

**HECMW\_Comm hecmwST\_local\_mesh::HECMW\_COMM**

MPIコミュニケーター.

**int hecmwST\_local\_mesh::PETOT**

総領域数

**int hecmwST\_local\_mesh::PEsmpTOT**

SMPノードあたりのPE数.

**int hecmwST\_local\_mesh::my\_rank**

プロセス番号

**int hecmwST\_local\_mesh::errnof**

エラー番号(Fotranでのみ使用)

**int hecmwST\_local\_mesh::n\_subdomain**

総領域数(局所分散データからの読み込み)

**int hecmwST\_local\_mesh::n\_neighbor\_pe**

隣接領域数

**int\* hecmwST\_local\_mesh::neighbor\_pe**

隣接領域番号

サイズ : n\_neighbor\_pe

**int\* hecmwST\_local\_mesh::import\_index**

受信テーブル用インデックス

サイズ : n\_neighbor\_pe+1

**int\* hecmwST\_local\_mesh::import\_item**

受信テーブル用配列

サイズ : import\_index[n\_neighbor\_pe]

**int\* hecmwST\_local\_mesh::export\_index**

送信テーブル用インデックス

サイズ : n\_neighbor\_pe+1

**int\* hecmwST\_local\_mesh::export\_item**

送信テーブル用配列

サイズ : export\_index[n\_neighbor\_pe]

**int\* hecmwST\_local\_mesh::shared\_index**

送受信テーブル用インデックス

サイズ : n\_neighbor\_pe+1

**int\* hecmwST\_local\_mesh::shared\_item**

送受信テーブル用配列

サイズ : shared\_index[n\_neighbor\_pe]

**int hecmwST\_local\_mesh::coarse\_grid\_level**

最も荒いメッシュのレベル

**int hecmwST\_local\_mesh::n\_adapt**

Refinementされた回数.

**int\* hecmwST\_local\_mesh::when\_i\_was\_refined\_node**

各節点の生成されたRefinementレベル

サイズ : n\_node

**int\* hecmwST\_local\_mesh::when\_i\_was\_refined\_elem**

各要素の生成されたRefinementレベル

サイズ : n\_elem

**int\* hecmwST\_local\_mesh::adapt\_parent\_type**

各要素の親要素の分割タイプ

サイズ : n\_elem

**int\* hecmwST\_local\_mesh::adapt\_type**

各要素の分割タイプ

サイズ : n\_elem

**int\* hecmwST\_local\_mesh::adapt\_level**

各要素の分割レベル

サイズ : n\_elem

**int\* hecmwST\_local\_mesh::adapt\_parent**

各要素の親要素ID(ローカル番号, 所属領域).

サイズ : 2\*n\_elem

- adapt\_parent[2\*i] : local ID
- adapt\_parent[2\*i+1]: PE



**int\* hecmwST\_local\_mesh::adapt\_children\_index**

各要素の子要素用インデックス

サイズ : n\_elem+1

**int\* hecmwST\_local\_mesh::adapt\_children\_item**

**struct hecmwST\_section\* hecmwST\_local\_mesh::section**

セクション情報

サイズ : 2\*adapt\_children\_index[n\_elem]

- adapt\_children\_item[2\*i] : local\_ID
- adapt\_children\_item[2\*i+1]: PE

**struct hecmwST\_material\* hecmwST\_local\_mesh::material**

材料情報

**struct hecmwST\_mpc\* hecmwST\_local\_mesh::mpc**

拘束グループ情報

**struct hecmwST\_amplitude\* hecmwST\_local\_mesh::amp**

AMPLITUDE情報.

```
struct hecmwST_node_grp* hecmwST_local_mesh::node_group
```

節点グループ情報

```
struct hecmwST_elem_grp* hecmwST_local_mesh::elem_group
```

要素グループ情報

```
struct hecmwST_surf_grp* hecmwST_local_mesh::surf_group
```

面グループ情報

---

この構造体の説明は次のファイルから生成されました:

- **hecmw\_struct.h**

## 構造体 hecmwST\_material

材料情報構造体

```
#include <hecmw_struct.h>
```

### 変数

- **int n\_mat**  
材料数
- **int n\_mat\_item**  
材料物性総数
- **int n\_mat\_subitem**  
材料物性サブ項目総数
- **int n\_mat\_table**  
材料物性テーブル総数
- **char \*\* mat\_name**  
材料物性名
- **int \* mat\_item\_index**  
材料数インデックス
- **int \* mat\_subitem\_index**  
材料物性数インデックス
- **int \* mat\_table\_index**  
材料物性テーブルインデックス

- double \* **mat\_val**  
材料物性
- double \* **mat\_temp**  
温度依存テーブル

---

## 説明

材料情報構造体

---

## 構造体

**int hecmwST\_material::n\_mat**

材料数

**int hecmwST\_material::n\_mat\_item**

材料物性総数

**int hecmwST\_material::n\_mat\_subitem**

材料物性サブ項目総数

**int hecmwST\_material::n\_mat\_table**

材料物性テーブル総数

**char\*\* hecmwST\_material::mat\_name**

材料物性名

サイズ：n\_mat

**int\* hecmwST\_material::mat\_item\_index**

材料数インデックス

サイズ：n\_mat+1

**int\* hecmwST\_material::mat\_subitem\_index**

材料物性数インデックス

サイズ：n\_mat\_item+1

**int\* hecmwST\_material::mat\_table\_index**

材料物性テーブルインデックス

サイズ：n\_mat\_subitem+1

**double\* hecmwST\_material::mat\_val**

材料物性

サイズ：mat\_table\_index[n\_mat\_subitem]

**double\* hecmwST\_material::mat\_temp**

温度依存テーブル

サイズ：mat\_table\_index[n\_mat\_subitem]

---

この構造体の説明は次のファイルから生成されました:

- **hecmw\_struct.h**

## 構造体 hecmwST\_mpc

拘束グループ情報構造体

```
#include <hecmw_struct.h>
```

### 変数

- **int n\_mpc**  
*拘束グループ数*
- **int \* mpc\_index**  
*拘束グループ用インデックス*
- **int \* mpc\_item**  
*拘束グループ節点番号*
- **int \* mpc\_dof**  
*拘束自由度情報*
- **double \* mpc\_val**  
*拘束自由度係数*

---

### 説明

拘束グループ情報構造体

---

### 構造体

**int hecmwST\_mpc::n\_mpc**

拘束グループ数

**int\* hecmwST\_mpc::mpc\_index**

拘束グループ用インデックス

サイズ : n\_mpc+1

**int\* hecmwST\_mpc::mpc\_item**

拘束グループ節点番号

サイズ : mpc\_index[n\_mpc]

**int\* hecmwST\_mpc::mpc\_dof**

拘束自由度情報

サイズ : mpc\_index[n\_mpc]

**double\* hecmwST\_mpc::mpc\_val**

拘束自由度係数

サイズ : mpc\_index[n\_mpc]

---

この構造体の説明は次のファイルから生成されました:

- **hecmw\_struct.h**



## 構造体 hecmwST\_node\_grp

節点グループ情報構造体

```
#include <hecmw_struct.h>
```

### 変数

- **int n\_grp**  
節点グループ数
- **char \*\* grp\_name**  
節点グループ名
- **int \* grp\_index**  
節点グループ要素用インデックス
- **int \* grp\_item**  
節点グループ要素用配列
- **int n\_bc**  
境界条件設定節点数(自由度数)
- **int \* bc\_grp\_ID**  
所属節点グループ番号
- **int \* bc\_grp\_type**  
境界条件タイプ
- **int \* bc\_grp\_index**  
境界条件設定節点番号

- `int * bc_grp_dof`  
境界条件設定自由度
- `double * bc_grp_val`  
境界条件値

---

## 説明

節点グループ情報構造体

---

## 構造体

`int hecmwST_node_grp::n_grp`

節点グループ数

`char** hecmwST_node_grp::grp_name`

節点グループ名

サイズ : `n_grp`

`int* hecmwST_node_grp::grp_index`

節点グループ要素用インデックス

サイズ : `n_grp+1`

`int* hecmwST_node_grp::grp_item`

節点グループ要素用配列

サイズ : grp\_index[n\_grp]

**int hecmwST\_node\_grp::n\_bc**

境界条件設定節点数(自由度数)

**int\* hecmwST\_node\_grp::bc\_grp\_ID**

所属節点グループ番号

サイズ : n\_bc

**int\* hecmwST\_node\_grp::bc\_grp\_type**

境界条件タイプ.

サイズ : n\_bc

- 1:変位
- 2:Flux
- 負:ユーザサブルーチン

**int\* hecmwST\_node\_grp::bc\_grp\_index**

境界条件設定節点番号

サイズ : n\_bc

**int\* hecmwST\_node\_grp::bc\_grp\_dof**

境界条件設定自由度

サイズ : n\_bc

**double\* hecmwST\_node\_grp::bc\_grp\_val**

境界条件値

サイズ : n\_bc

---

この構造体の説明は次のファイルから生成されました:

- **hecmw\_struct.h**

## 構造体 hecmwST\_result\_data

結果データ構造体

```
#include <hecmw_result.h>
```

### 変数

- **int nn\_component**  
節点コンポーネント数
- **int ne\_component**  
要素コンポーネント数
- **int \* nn\_dof**  
節点自由度数
- **int \* ne\_dof**  
要素自由度数
- **char \*\* node\_label**  
節点コンポーネントラベル
- **char \*\* elem\_label**  
要素コンポーネントラベル
- **double \* node\_val\_item**  
節点値
- **double \* elem\_val\_item**  
要素値

---

## 説明

結果データ構造体

---

## 構造体

**int hecmwST\_result\_data::nn\_component**

節点コンポーネント数

**int hecmwST\_result\_data::ne\_component**

要素コンポーネント数

**int\* hecmwST\_result\_data::nn\_dof**

節点自由度数

nn\_dof[0]...nn\_dof[nn\_component-1]

**int\* hecmwST\_result\_data::ne\_dof**

要素自由度数

ne\_dof[0]...ne\_dof[ne\_component-1]

**char\*\* hecmwST\_result\_data::node\_label**

節点コンポーネントラベル

node\_label[0]...node\_label[nn\_component-1]

**char\*\* hecmwST\_result\_data::elem\_label**

要素コンポーネントラベル

elem\_label[0]...elem\_label[ne\_component-1]

**double\* hecmwST\_result\_data::node\_val\_item**

節点値

node\_val\_item[0]...node\_val\_item[sum(nn\_dof)\*nn\_component\*節点数-1]

**double\* hecmwST\_result\_data::elem\_val\_item**

要素値

elem\_val\_item[0]...elem\_val\_item[sum(ne\_dof)\*ne\_component\*要素数-1]

---

この構造体の説明は次のファイルから生成されました:

- **hecmw\_result.h**

## 構造体 hecmwST\_section

セクション情報構造体

```
#include <hecmw_struct.h>
```

### 変数

- **int n\_sect**  
セクション数
- **int \* sect\_type**  
セクションタイプ.
- **int \* sect\_opt**
- **int \* sect\_mat\_ID\_index**  
材料物性用インデックス
- **int \* sect\_mat\_ID\_item**  
材料物性ID
- **int \* sect\_I\_index**  
セクション値用インデックス(整数)
- **int \* sect\_I\_item**  
セクション値配列(整数)
- **int \* sect\_R\_index**  
セクション値用インデックス(実数)
- **double \* sect\_R\_item**  
セクション値用配列(実数)



---

## 説明

セクション情報構造体

---

## 構造体

**int hecmwST\_section::n\_sect**

セクション数

**int\* hecmwST\_section::sect\_type**

セクションタイプ.

サイズ : n\_sect

- 1:SOLID
- 2:SHELL
- 3:BEAM
- 4:INTERFACE

**int\* hecmwST\_section::sect\_opt**

**int\* hecmwST\_section::sect\_mat\_ID\_index**

材料物性用インデックス

サイズ : n\_sect+1

**int\* hecmwST\_section::sect\_mat\_ID\_item**

材料物性ID

サイズ : sect\_mat\_ID\_index[n\_sect]

**int\* hecmwST\_section::sect\_I\_index**

セクション値用インデックス(整数)

サイズ : n\_sect+1

**int\* hecmwST\_section::sect\_I\_item**

セクション値配列(整数)

サイズ : sect\_I\_index[n\_sect]

**int\* hecmwST\_section::sect\_R\_index**

セクション値用インデックス(実数)

サイズ : n\_sect+1

**double\* hecmwST\_section::sect\_R\_item**

セクション値用配列(実数)

サイズ : sect\_R\_index[n\_sect]

---

この構造体の説明は次のファイルから生成されました:

- **hecmw\_struct.h**

## 構造体 hecmwST\_surf\_grp

面グループ情報構造体

```
#include <hecmw_struct.h>
```

### 変数

- **int n\_grp**  
面グループ数
- **char \*\* grp\_name**  
面グループ名
- **int \* grp\_index**  
面グループ要素用インデックス
- **int \* grp\_item**  
面グループ要素用配列(ローカル要素番号, 局所面番号) サイズ:  $2 * \text{grp\_index}[\text{n\_grp}]$
- **int n\_bc**  
境界条件設定用素数(自由度数)
- **int \* bc\_grp\_ID**  
所属要素グループ番号
- **int \* bc\_grp\_type**  
境界条件タイプ
- **int \* bc\_grp\_index**  
境界条件設定面番号(要素, 局所面番号).

- `double * bc_grp_val`

境界条件値

---

## 説明

面グループ情報構造体

---

## 構造体

`int hecmwST_surf_grp::n_grp`

面グループ数

`char** hecmwST_surf_grp::grp_name`

面グループ名

サイズ : `n_grp`

`int* hecmwST_surf_grp::grp_index`

面グループ要素用インデックス

サイズ : `n_grp+1`

`int* hecmwST_surf_grp::grp_item`

面グループ要素用配列(ローカル要素番号, 局所面番号) サイズ : `2*grp_index[n_grp]`

- `grp_index[i*2]` : ローカル要素番号

- `grp_index[i*2+1]`: 局所面番号

**`int hecmwST_surf_grp::n_bc`**

境界条件設定用素数(自由度数)

**`int* hecmwST_surf_grp::bc_grp_ID`**

所属要素グループ番号

サイズ : `n_bc`

**`int* hecmwST_surf_grp::bc_grp_type`**

境界条件タイプ.

サイズ : `n_bc`

- 1:変位
- 2:Flux

**`int* hecmwST_surf_grp::bc_grp_index`**

境界条件設定面番号(要素, 局所面番号).

サイズ : `2*n_bc`

- `bc_grp_index[2*i]`: 要素番号

- `bc_grp_index[2*i+1]`: 局所面番号

**`double* hecmwST_surf_grp::bc_grp_val`**

境界条件値

サイズ : `n_bc`

---

この構造体の説明は次のファイルから生成されました:

- **`hecmw_struct.h`**

### 8.3. HEC-MW ファイル一覧

以下にファイル一覧を示す.

|                                                       |     |
|-------------------------------------------------------|-----|
| hecmw_ablex.h (ABAQUSメッシュデータの字句解析ルーチン )               | 206 |
| hecmw_bit_array.h (ビット配列 )                            | 216 |
| hecmw_comm.h (コミュニケーター関連 )                            | 220 |
| hecmw_common.h (Commonディレクトリ内のヘッダをインクルード )            | 227 |
| hecmw_common_define.h (要素情報の定数定義 )                    | 228 |
| hecmw_config.h (HEC-MWで使用する定数等の定義 )                   | 294 |
| hecmw_control.h (全体制御ファイルの読み込みと, その情報取得を行う )          | 300 |
| hecmw_ctrllex.h (全体制御データの字句解析ルーチン )                   | 312 |
| hecmw_debug_write_dist.h (分散メッシュデータのDEBUG出力 )         | 318 |
| hecmw_dist.h (メッシュデータ構造体に関する処理 )                      | 333 |
| hecmw_dist_copy_f2c.h (FortranからCへメッシュデータをコピーする )     | 336 |
| hecmw_dist_free.h (メッシュデータ構造体のメモリ領域を解放する. )           | 338 |
| hecmw_dist_print.h (メッシュデータ構造体の内容出力する )               | 342 |
| hecmw_error.h (エラーが発生した場合, その情報を保存し, 他の関数から取得可能とする. ) | 350 |
| hecmw_etype.h (要素情報を提供する )                            | 354 |
| hecmw_finalize.h (HEC-MWの全体終了処理を行う )                  | 359 |
| hecmw_geometric.h (幾何学的計算・変換処理を行う )                   | 361 |
| hecmw_gflex.h (GeoFEMメッシュデータの字句解析ルーチン )               | 364 |
| hecmw_heclex.h (HEC-MW単一領域メッシュデータの字句解析ルーチン )          | 368 |
| hecmw_init.h (HEC-MWの全体初期化処理を行う )                     | 376 |
| hecmw_io.h (IO関連のヘッダをインクルード )                         | 378 |
| hecmw_io_abaqus.h (ABAQUSメッシュデータ入力ルーチン )              | 379 |
| hecmw_io_dist.h (HEC-MW分散メッシュデータ入出力ルーチン )             | 381 |
| hecmw_io_geofem.h (GeoFEMメッシュデータ入力ルーチン )              | 383 |
| hecmw_io_get_mesh.h (メッシュデータ取得ルーチン )                  | 385 |
| hecmw_io_hec.h (HEC-MW単一領域メッシュデータ入力ルーチン )             | 388 |
| hecmw_io_mesh.h (全体メッシュデータの取得とメッシュデータ構造体生成 )          | 390 |



|                                                           |     |
|-----------------------------------------------------------|-----|
| <b>hecmw_io_put_mesh.h</b> (メッシュデータをファイルに出力する )           | 408 |
| <b>hecmw_io_struct.h</b> (メッシュデータ入力時に使用するデータ構造 )          | 410 |
| <b>hecmw_lib_fc.h</b> (FortranとC間のデータ変換ユーティリティ )          | 413 |
| <b>hecmw_log.h</b> (ログ出力を可能とするための関数ライブラリ )                | 416 |
| <b>hecmw_malloc.h</b> (メモリリーク検出ライブラリ )                    | 424 |
| <b>hecmw_map_int.h</b> (正数をキーとするマップ )                     | 431 |
| <b>hecmw_msg.h</b> (HEC-MWメッセージ情報ライブラリ )                  | 438 |
| <b>hecmw_path.h</b> (パス名に関する処理を行うユーティリティ )                | 441 |
| <b>hecmw_reorder.h</b> (メッシュ情報の並べ替え実装 )                   | 444 |
| <b>hecmw_restart.h</b> (リスタートデータの入出力を行う )                 | 446 |
| <b>hecmw_result.h</b> (結果データ 入出力 )                        | 454 |
| <b>hecmw_result_copy_c2f.h</b> (CからFortranへ結果データのコピーを行う ) | 461 |
| <b>hecmw_result_copy_f2c.h</b> (FortranからCへ結果データのコピーを行う ) | 463 |
| <b>hecmw_set_int.h</b> (整数の集合 )                           | 465 |
| <b>hecmw_struct.h</b> (メッシュデータ構造体定義 )                     | 470 |
| <b>hecmw_system.h</b> (局所座標系から全体座標系への変換を行う )              | 475 |
| <b>hecmw_ucd_print.h</b> (UCDファイルを出力する )                  | 477 |
| <b>hecmw_util.h</b> (HEC-MWユーティリティ )                      | 478 |

## 8.4. HEC-MW ファイル

### hecmw\_ablex.h

ABAQUSメッシュデータの字句解析ルーチン.

```
#include <stdio.h>
```

#### 列挙型

- enum { **HECMW\_ABLEX\_NL** = 1000, **HECMW\_ABLEX\_INT**,  
**HECMW\_ABLEX\_DOUBLE**, **HECMW\_ABLEX\_NAME**, **HECMW\_ABLEX\_FILENAME**,  
**HECMW\_ABLEX\_HEADER**, **HECMW\_ABLEX\_H\_AMPLITUDE** = 2000,  
**HECMW\_ABLEX\_H\_CONDUCTIVITY**, **HECMW\_ABLEX\_H\_DENSITY**,  
**HECMW\_ABLEX\_H\_ELASTIC**, **HECMW\_ABLEX\_H\_ELEMENT**,  
**HECMW\_ABLEX\_H\_ELSET**, **HECMW\_ABLEX\_H\_EQUATION**,  
**HECMW\_ABLEX\_H\_HEADING**, **HECMW\_ABLEX\_H\_INCLUDE**,  
**HECMW\_ABLEX\_H\_INITIAL**, **HECMW\_ABLEX\_H\_MATERIAL**,  
**HECMW\_ABLEX\_H\_NODE**, **HECMW\_ABLEX\_H\_NSET**,  
**HECMW\_ABLEX\_H\_SHELL\_SECTION**, **HECMW\_ABLEX\_H\_SOLID\_SECTION**,  
**HECMW\_ABLEX\_H\_SPECIFIC\_HEAT**, **HECMW\_ABLEX\_H\_SYSTEM**,  
**HECMW\_ABLEX\_K\_ABSOLUTE** = 3000, **HECMW\_ABLEX\_K\_ANISOTROPIC**,  
**HECMW\_ABLEX\_K\_ELSET**, **HECMW\_ABLEX\_K\_ENGINEERING\_CONSTANTS**,  
**HECMW\_ABLEX\_K\_DEFINITION**, **HECMW\_ABLEX\_K\_DEPENDENCIES**,  
**HECMW\_ABLEX\_K\_GENERATE**, **HECMW\_ABLEX\_K\_INPUT**,  
**HECMW\_ABLEX\_K\_ISOTROPIC**, **HECMW\_ABLEX\_K\_LAMINA**,  
**HECMW\_ABLEX\_K\_MATERIAL**, **HECMW\_ABLEX\_K\_NAME**,  
**HECMW\_ABLEX\_K\_NSET**, **HECMW\_ABLEX\_K\_ORTHOTROPIC**,  
**HECMW\_ABLEX\_K\_RELATIVE**, **HECMW\_ABLEX\_K\_STEP\_TIME**,  
**HECMW\_ABLEX\_K\_SYSTEM**, **HECMW\_ABLEX\_K\_TABULAR**,  
**HECMW\_ABLEX\_K\_TEMPERATURE**, **HECMW\_ABLEX\_K\_TIME**,  
**HECMW\_ABLEX\_K\_TYPE**, **HECMW\_ABLEX\_K\_UNSORTED**,  
**HECMW\_ABLEX\_K\_VALUE**, **HECMW\_ABLEX\_E\_B31** = 4000,

HECMW\_ABLEX\_E\_B32, HECMW\_ABLEX\_E\_C3D4, HECMW\_ABLEX\_E\_C3D6,  
 HECMW\_ABLEX\_E\_C3D8, HECMW\_ABLEX\_E\_C3D8I, HECMW\_ABLEX\_E\_C3D10,  
 HECMW\_ABLEX\_E\_C3D15, HECMW\_ABLEX\_E\_C3D20, HECMW\_ABLEX\_E\_CAX3,  
 HECMW\_ABLEX\_E\_CAX4, HECMW\_ABLEX\_E\_CAX4I, HECMW\_ABLEX\_E\_CAX4R,  
 HECMW\_ABLEX\_E\_CAX6, HECMW\_ABLEX\_E\_CAX8, HECMW\_ABLEX\_E\_CAX8R,  
 HECMW\_ABLEX\_E\_CPE3, HECMW\_ABLEX\_E\_CPE4, HECMW\_ABLEX\_E\_CPE4I,  
 HECMW\_ABLEX\_E\_CPE4R, HECMW\_ABLEX\_E\_CPE6, HECMW\_ABLEX\_E\_CPE8,  
 HECMW\_ABLEX\_E\_CPE8R, HECMW\_ABLEX\_E\_CPS3, HECMW\_ABLEX\_E\_CPS4,  
 HECMW\_ABLEX\_E\_CPS4I, HECMW\_ABLEX\_E\_CPS4R, HECMW\_ABLEX\_E\_CPS6,  
 HECMW\_ABLEX\_E\_CPS8, HECMW\_ABLEX\_E\_CPS8R, HECMW\_ABLEX\_E\_DC1D2,  
 HECMW\_ABLEX\_E\_DC1D3, HECMW\_ABLEX\_E\_DC2D3, HECMW\_ABLEX\_E\_DC2D4,  
 HECMW\_ABLEX\_E\_DC2D6, HECMW\_ABLEX\_E\_DC2D8, HECMW\_ABLEX\_E\_DC3D4,  
 HECMW\_ABLEX\_E\_DC3D6, HECMW\_ABLEX\_E\_DC3D8, HECMW\_ABLEX\_E\_DC3D10,  
 HECMW\_ABLEX\_E\_DC3D15, HECMW\_ABLEX\_E\_DC3D20,  
 HECMW\_ABLEX\_E\_DCAX3, HECMW\_ABLEX\_E\_DCAX4, HECMW\_ABLEX\_E\_DCAX6,  
 HECMW\_ABLEX\_E\_DCAX8, HECMW\_ABLEX\_E\_DINTER4,  
 HECMW\_ABLEX\_E\_DINTER8, HECMW\_ABLEX\_E\_DS4, HECMW\_ABLEX\_E\_DS8,  
 HECMW\_ABLEX\_E\_INTER4, HECMW\_ABLEX\_E\_INTER8, HECMW\_ABLEX\_E\_S3R,  
 HECMW\_ABLEX\_E\_S4R, HECMW\_ABLEX\_E\_S8R, HECMW\_ABLEX\_E\_T3D2,  
 HECMW\_ABLEX\_E\_T3D3 }

トークン番号定義

## 関数

- double **HECMW\_ablex\_get\_number** (void)  
 直前に読み込んだトークンが数値であった場合、その値を返す
- char \* **HECMW\_ablex\_get\_text** (void)  
 直前に読み込んだトークンの文字列表記を返す
- int **HECMW\_ablex\_get\_lineno** (void)  
 読み込んでいるファイルの現在の行番号を返す

- **int HECMW\_ablex\_next\_token** (void)  
次のトークンを返す
- **int HECMW\_ablex\_next\_token\_skip** (int skip\_token)  
次のトークンを返す
- **int HECMW\_ablex\_set\_input** (FILE \*fp)  
字句解析ルーチンで読み込むファイルのファイルポインタをセットする
- **int HECMW\_ablex\_skip\_line** (void)  
現在読み込み中の行を読み飛ばし、その行の最後のトークン番号を返す
- **int HECMW\_ablex\_switch\_to\_include** (const char \*filename)  
現在読み込み中の字句解析ルーチンを中断し、新たなファイル(インクルードファイル)を解析対象とする
- **int HECMW\_ablex\_unput\_token** (void)  
直前に読み込んだトークンを押し戻す
- **int HECMW\_ablex\_is\_including** (void)  
現在解析中のファイルがインクルードファイルか否かを返す

---

## 説明

ABAQUS メッシュデータの字句解析ルーチン.

日付:

2004年2月16日

作者:

坂根 一彰

---

## 列挙型

### anonymous enum

トークン番号定義

列挙型の値:

*HECMW\_ABLEX\_NL* 改行文字  
*HECMW\_ABLEX\_INT* 整数  
*HECMW\_ABLEX\_DOUBLE* 浮動小数点  
*HECMW\_ABLEX\_NAME* 名前  
*HECMW\_ABLEX\_FILENAME* ファイル名a  
*HECMW\_ABLEX\_HEADER* ヘッダデータ  
*HECMW\_ABLEX\_H\_AMPLITUDE* \*AMPLITUDE  
*HECMW\_ABLEX\_H\_CONDUCTIVITY* \*CONDUCTIVITY  
*HECMW\_ABLEX\_H\_DENSITY* \*DENSITY  
*HECMW\_ABLEX\_H\_ELASTIC* \*ELASTIC  
*HECMW\_ABLEX\_H\_ELEMENT* \*ELEMENT  
*HECMW\_ABLEX\_H\_ELSET* \*ELSET  
*HECMW\_ABLEX\_H\_EQUATION* \*EQUATION  
*HECMW\_ABLEX\_H\_HEADING* \*HEADING  
*HECMW\_ABLEX\_H\_INCLUDE* \*INCLUDE  
*HECMW\_ABLEX\_H\_INITIAL* \*INITIAL CONDITIONS  
*HECMW\_ABLEX\_H\_MATERIAL* \*MATERIAL  
*HECMW\_ABLEX\_H\_NODE* \*NODE  
*HECMW\_ABLEX\_H\_NSET* \*NSET  
*HECMW\_ABLEX\_H\_SHELL\_SECTION* \*SHELL SECTION  
*HECMW\_ABLEX\_H\_SOLID\_SECTION* \*SOLID SECTION  
*HECMW\_ABLEX\_H\_SPECIFIC\_HEAT* \*SPECIFIC HEAT  
*HECMW\_ABLEX\_H\_SYSTEM* \*SYSTEM  
*HECMW\_ABLEX\_K\_ABSOLUTE* ABSOLUTE.  
*HECMW\_ABLEX\_K\_ANISOTROPIC* ANISOTROPIC.

*HECMW\_ABLEX\_K\_ELSET* ELSE.  
*HECMW\_ABLEX\_K\_ENGINEERING\_CONSTANTS* ENGINEERING CONSTANTS.  
*HECMW\_ABLEX\_K\_DEFINITION* DEFINITION.  
*HECMW\_ABLEX\_K\_DEPENDENCIES* DEPENDENCIES.  
*HECMW\_ABLEX\_K\_GENERATE* GENERATE.  
*HECMW\_ABLEX\_K\_INPUT* INPUT.  
*HECMW\_ABLEX\_K\_ISOTROPIC* ISOTROPIC.  
*HECMW\_ABLEX\_K\_LAMINA* LAMINA.  
*HECMW\_ABLEX\_K\_MATERIAL* MATERIAL.  
*HECMW\_ABLEX\_K\_NAME* NAME.  
*HECMW\_ABLEX\_K\_NSET* NSET.  
*HECMW\_ABLEX\_K\_ORTHOTROPIC* ORTHOTROPIC.  
*HECMW\_ABLEX\_K\_RELATIVE* RELATIVE.  
*HECMW\_ABLEX\_K\_STEP\_TIME* STEP TIME.  
*HECMW\_ABLEX\_K\_SYSTEM* SYSTEM.  
*HECMW\_ABLEX\_K\_TABULAR* TABULAR.  
*HECMW\_ABLEX\_K\_TEMPERATURE* TEMPERATURE.  
*HECMW\_ABLEX\_K\_TIME* TIME.  
*HECMW\_ABLEX\_K\_TYPE* TYPE.  
*HECMW\_ABLEX\_K\_UNSORTED* UNSORTED.  
*HECMW\_ABLEX\_K\_VALUE* VALUE.  
*HECMW\_ABLEX\_E\_B31* B31.  
*HECMW\_ABLEX\_E\_B32* B32.  
*HECMW\_ABLEX\_E\_C3D4* C3D4.  
*HECMW\_ABLEX\_E\_C3D6* C3D6.  
*HECMW\_ABLEX\_E\_C3D8* C3D8.  
*HECMW\_ABLEX\_E\_C3D8I* C3D8I.  
*HECMW\_ABLEX\_E\_C3D10* C3D10.  
*HECMW\_ABLEX\_E\_C3D15* C3D15.  
*HECMW\_ABLEX\_E\_C3D20* C3D20.  
*HECMW\_ABLEX\_E\_CAX3* CAX3.  
*HECMW\_ABLEX\_E\_CAX4* CAX4.  
*HECMW\_ABLEX\_E\_CAX4I* CAX4I.  
*HECMW\_ABLEX\_E\_CAX4R* CAX4R.  
*HECMW\_ABLEX\_E\_CAX6* CAX6.  
*HECMW\_ABLEX\_E\_CAX8* CAX8.

*HECMW\_ABLEX\_E\_CAX8R* CAX8R.  
*HECMW\_ABLEX\_E\_CPE3* CPE3.  
*HECMW\_ABLEX\_E\_CPE4* CPE4.  
*HECMW\_ABLEX\_E\_CPE4I* CPE4I.  
*HECMW\_ABLEX\_E\_CPE4R* CPE4R.  
*HECMW\_ABLEX\_E\_CPE6* CPE6.  
*HECMW\_ABLEX\_E\_CPE8* CPE8.  
*HECMW\_ABLEX\_E\_CPE8R* CPE8R.  
*HECMW\_ABLEX\_E\_CPS3* CPES3.  
*HECMW\_ABLEX\_E\_CPS4* CPS4.  
*HECMW\_ABLEX\_E\_CPS4I* CPS4I.  
*HECMW\_ABLEX\_E\_CPS4R* CPS4R.  
*HECMW\_ABLEX\_E\_CPS6* CPS6.  
*HECMW\_ABLEX\_E\_CPS8* CPS8.  
*HECMW\_ABLEX\_E\_CPS8R* CPS8R.  
*HECMW\_ABLEX\_E\_DC1D2* DC1D2.  
*HECMW\_ABLEX\_E\_DC1D3* DC1D3.  
*HECMW\_ABLEX\_E\_DC2D3* DC2D3.  
*HECMW\_ABLEX\_E\_DC2D4* DC2D4.  
*HECMW\_ABLEX\_E\_DC2D6* DC2D6.  
*HECMW\_ABLEX\_E\_DC2D8* DC2D8.  
*HECMW\_ABLEX\_E\_DC3D4* DC3D4.  
*HECMW\_ABLEX\_E\_DC3D6* DC3D6.  
*HECMW\_ABLEX\_E\_DC3D8* DC3D8.  
*HECMW\_ABLEX\_E\_DC3D10* DC3D10.  
*HECMW\_ABLEX\_E\_DC3D15* DC3D15.  
*HECMW\_ABLEX\_E\_DC3D20* DC3D20.  
*HECMW\_ABLEX\_E\_DCAX3* DCAX3.  
*HECMW\_ABLEX\_E\_DCAX4* DCAX4.  
*HECMW\_ABLEX\_E\_DCAX6* DCAX6.  
*HECMW\_ABLEX\_E\_DCAX8* DCAX8.  
*HECMW\_ABLEX\_E\_DINTER4* DINTER4.  
*HECMW\_ABLEX\_E\_DINTER8* DINTER8.  
*HECMW\_ABLEX\_E\_DS4* DS4.  
*HECMW\_ABLEX\_E\_DS8* DS8.  
*HECMW\_ABLEX\_E\_INTER4* INTER4.

*HECMW\_ABLEX\_E\_INTER8* INTER8.

*HECMW\_ABLEX\_E\_S3R* S3R.

*HECMW\_ABLEX\_E\_S4R* S4R.

*HECMW\_ABLEX\_E\_S8R* S8R.

*HECMW\_ABLEX\_E\_T3D2* T3D2.

*HECMW\_ABLEX\_E\_T3D3* T3D3.

---

## 関数

### **double HECMW\_ablex\_get\_number (void)**

直前に読み込んだトークンが数値であった場合、その値を返す

戻り値:

直前に読み込まれた数値

### **char\* HECMW\_ablex\_get\_text (void)**

直前に読み込んだトークンの文字列表記を返す

戻り値:

直前に読み込まれたトークンの文字列表記

### **int HECMW\_ablex\_get\_lineno (void)**

読み込んでいるファイルの現在の行番号を返す

戻り値:



行番号

### **int HECMW\_ablex\_next\_token (void)**

次のトークンを返す

EOFに達した場合は0を返す

**戻り値:**

次のトークン番号

### **int HECMW\_ablex\_next\_token\_skip (int *skip\_token*)**

次のトークンを返す

*skip\_token*で指定されたトークンの連続は読み飛ばされる。それ以外のトークンが現れたらそれを返す。 EOFに達した場合は0を返す

**戻り値:**

次のトークン番号

### **int HECMW\_ablex\_set\_input (FILE \* *fp*)**

字句解析ルーチンで読み込むファイルのファイルポインタをセットする

**引数:**

*fp* 字句解析対象のファイルへのファイルポインタ

**戻り値:**

成功すれば0を返す。 引数が無効なら-1を返す。

### **int HECMW\_ablex\_skip\_line (void)**

現在読み込み中の行を読み飛ばし、その行の最後のトークン番号を返す

#### **戻り値:**

現在の行の最後のトークン番号。EOFに達した場合は0を返す。

### **int HECMW\_ablex\_switch\_to\_include (const char \* *filename*)**

現在読み込み中の字句解析ルーチンを中断し、新たなファイル(インクルードファイル)を解析対象とする

解析中のファイルの情報は保存される。インクルードファイルへの切替えは、この関数の呼び出し直後から有効になり、次に返されるトークンはインクルードファイルのものとなる。

インクルードファイルのトークンがなくなると、自動的に保存されていた状態に切り替わり、前のファイルの解析が再開される。インクルードファイルの解析が終了したことを通知することはないが、**HECMW\_ablex\_is\_including()**によって、現在インクルードファイルを読んでいるのか否かを知ることができる。

#### **引数:**

*filename* インクルードファイル名

#### **戻り値:**

成功すれば0を返す。失敗すれば-1を返し、HECMW\_set\_error()によってエラー情報がセットされる。

### **int HECMW\_ablex\_unput\_token (void)**

直前に読み込んだトークンを押し戻す

次回取得したトークンは、押し戻したトークンとなる。

戻り値:

常に0を返す.

**int HECMW\_ablex\_is\_including (void)**

現在解析中のファイルがインクルードファイルか否かを返す

戻り値:

インクルードファイル解析中なら1を返し、そうでなければ0を返す

## hecmw\_bit\_array.h

ビット配列

### データ構造

- `struct hecmw_bit_array`  
ビット配列構造体

### 関数

- `int HECMW_bit_array_init (struct hecmw_bit_array *ba, int len)`  
ビット配列を初期化する
- `void HECMW_bit_array_finalize (struct hecmw_bit_array *ba)`  
ビット配列のメモリ領域を解放する
- `int HECMW_bit_array_len (struct hecmw_bit_array *ba)`  
ビット配列の長さを取得する
- `int HECMW_bit_array_set (struct hecmw_bit_array *ba, int index)`  
ビット配列の`index`番目のビットを1にする
- `int HECMW_bit_array_get (struct hecmw_bit_array *ba, int index)`  
ビット配列の`index`番目のビットを取得する
- `int HECMW_bit_array_set_all (struct hecmw_bit_array *ba)`  
ビット配列のすべてのビットを1にする

- **void HECMW\_bit\_array\_unset** (struct hecmw\_bit\_array \*ba, int index)

ビット配列のindex番目のビットを0にする

---

## 説明

ビット配列

日付:

2007年11月22日

作者:

後藤 和哉

---

## 関数

**int HECMW\_bit\_array\_init** (struct hecmw\_bit\_array \*ba, int len)

ビット配列を初期化する

引数:

*ba* ビット配列

*len* 長さ

戻り値:

常に1を返す.

**void HECMW\_bit\_array\_finalize** (struct hecmw\_bit\_array \*ba)

ビット配列のメモリ領域を解放する

引数:

*ba* ビット配列

戻り値:

常に1を返す.

**int HECMW\_bit\_array\_len (struct hecmw\_bit\_array \*ba)**

ビット配列の長さを取得する

引数:

*ba* ビット配列

戻り値:

常に1を返す.

**int HECMW\_bit\_array\_set (struct hecmw\_bit\_array \*ba, int index)**

ビット配列のindex番目のビットを1にする

引数:

*ba* ビット配列

*index* インデックス

戻り値:

常に1を返す.

**int HECMW\_bit\_array\_get (struct hecmw\_bit\_array \*ba, int index)**

ビット配列のindex番目のビットを取得する

引数:

*ba* ビット配列

*index* インデックス

戻り値:

常に1を返す.

**int HECMW\_bit\_array\_set\_all (struct hecmw\_bit\_array \*ba)**

ビット配列のすべてのビットを1にする

引数:

*ba* ビット配列

戻り値:

常に1を返す.

**void HECMW\_bit\_array\_unset (struct hecmw\_bit\_array \*ba, int index)**

ビット配列のindex番目のビットを0にする

引数:

*ba* ビット配列

*index* インデックス

戻り値:

常に1を返す.

## hecmw\_comm.h

コミュニケーター関連

```
#include "hecmw_config.h"
```

### 関数

- int **HECMW\_Barrier** (**HECMW\_Comm** comm)
- int **HECMW\_Wait** (**HECMW\_Request** \*request, **HECMW\_Status** \*status)
- int **HECMW\_Waitall** (int count, **HECMW\_Request** \*array\_of\_requests, **HECMW\_Status** \*array\_of\_statuses)
- int **HECMW\_Bcast** (void \*buffer, int count, **HECMW\_Datatype** datatype, int root, **HECMW\_Comm** comm)
- int **HECMW\_Send** (void \*buffer, int count, **HECMW\_Datatype** datatype, int dest, int tag, **HECMW\_Comm** comm)
- int **HECMW\_Recv** (void \*buffer, int count, **HECMW\_Datatype** datatype, int source, int tag, **HECMW\_Comm** comm, **HECMW\_Status** \*status)
- int **HECMW\_Isend** (void \*buffer, int count, **HECMW\_Datatype** datatype, int dest, int tag, **HECMW\_Comm** comm, **HECMW\_Request** \*request)
- int **HECMW\_Irecv** (void \*buffer, int count, **HECMW\_Datatype** datatype, int source, int tag, **HECMW\_Comm** comm, **HECMW\_Request** \*request)
- int **HECMW\_Allreduce** (void \*sendbuf, void \*recvbuf, int count, **HECMW\_Datatype** datatype, **HECMW\_Op** op, **HECMW\_Comm** comm)
- int **HECMW\_Allgather** (void \*sendbuf, int sendcount, **HECMW\_Datatype** sendtype, void \*recvbuf, int recvcount, **HECMW\_Datatype** recvttype, **HECMW\_Comm** comm)
- int **HECMW\_Group\_incl** (**HECMW\_Group** group, int n, int \*ranks, **HECMW\_Group** \*newgroup)
- int **HECMW\_Group\_excl** (**HECMW\_Group** group, int n, int \*ranks, **HECMW\_Group** \*newgroup)
- int **HECMW\_Comm\_create** (**HECMW\_Comm** comm, **HECMW\_Group** group, **HECMW\_Comm** \*comm\_out)
- int **HECMW\_Group\_rank** (**HECMW\_Group** group, int \*rank)
- int **HECMW\_Group\_size** (**HECMW\_Group** group, int \*size)



- **int HECMW\_Comm\_group (HECMW\_Comm comm, HECMW\_Group \*group)**
- **int HECMW\_comm\_init (int \*argc, char \*\*\*argv)**  
 コミュニケータ初期化処理を行う
- **HECMW\_Comm HECMW\_comm\_get\_comm (void)**  
 コミュニケータを返す
- **int HECMW\_comm\_get\_size (void)**  
 総領域数を返す
- **int HECMW\_comm\_get\_rank (void)**  
 ランク番号を返す
- **HECMW\_Group HECMW\_comm\_get\_group (void)**  
 MPI グループを返す.
- **HECMW\_Fint HECMW\_comm\_c2f (HECMW\_Comm comm)**  
 C のコミュニケータをFortran のコミュニケータに変換する
- **HECMW\_Comm HECMW\_comm\_f2c (HECMW\_Fint comm)**  
 Fortran のコミュニケータをC のコミュニケータに変換する
- **int HECMW\_comm\_is\_initialized (void)**  
 コミュニケータ初期化が行われているか否かを返す

---

## 説明

### コミュニケータ関連

MPI 関数を使用してコミュニケータ等の初期化を行う。取得した情報をいつでも得られるように、アクセス関数を用意する。C においては、MPI はできるだ

け隠蔽されるので、情報が欲しい場合はこれらのラッパー関数を使用することになる。

日付:

2004年2月16日

作者:

坂根 一彰

---

## 関数

**int HECMW\_Barrier (HECMW\_Comm *comm*)**

**int HECMW\_Wait (HECMW\_Request \* *request*, HECMW\_Status \* *statuse*)**

**int HECMW\_Waitall (int *count*, HECMW\_Request \* *array\_of\_requests*,  
HECMW\_Status \* *array\_of\_statuses*)**

**int HECMW\_Bcast (void \* *buffer*, int *count*, HECMW\_Datatype *datatype*, int *root*,  
HECMW\_Comm *comm*)**

**int HECMW\_Send (void \* *buffer*, int *count*, HECMW\_Datatype *datatype*, int *dest*,  
int *tag*, HECMW\_Comm *comm*)**

**int HECMW\_Recv (void \* *buffer*, int *count*, HECMW\_Datatype *datatype*, int *source*,  
int *tag*, HECMW\_Comm *comm*, HECMW\_Status \* *status*)**

**int HECMW\_Isend (void \* *buffer*, int *count*, HECMW\_Datatype *datatype*, int *dest*,  
int *tag*, HECMW\_Comm *comm*, HECMW\_Request \* *request*)**

**int HECMW\_Irecv (void \* *buffer*, int *count*, HECMW\_Datatype *datatype*, int *source*,  
int *tag*, HECMW\_Comm *comm*, HECMW\_Request \* *request*)**

**int HECMW\_Allreduce (void \* *sendbuf*, void \* *recvbuf*, int *count*,  
HECMW\_Datatype *datatype*, HECMW\_Op *op*, HECMW\_Comm *comm*)**

**int HECMW\_Allgather (void \* *sendbuf*, int *sendcount*, HECMW\_Datatype *sendtype*,  
void \* *recvbuf*, int *recvcount*, HECMW\_Datatype *recvtype*, HECMW\_Comm *comm*)**

**int HECMW\_Group\_incl (HECMW\_Group *group*, int *n*, int \* *ranks*, HECMW\_Group  
\* *newgroup*)**

**int HECMW\_Group\_excl (HECMW\_Group *group*, int *n*, int \* *ranks*, HECMW\_Group  
\* *newgroup*)**

**int HECMW\_Comm\_create (HECMW\_Comm *comm*, HECMW\_Group *group*,  
HECMW\_Comm \* *comm\_out*)**

**int HECMW\_Group\_rank (HECMW\_Group *group*, int \* *rank*)**

**int HECMW\_Group\_size (HECMW\_Group *group*, int \* *size*)**

**int HECMW\_Comm\_group (HECMW\_Comm *comm*, HECMW\_Group \* *group*)**

**int HECMW\_comm\_init (int \* *argc*, char \*\*\* *argv*)**

コミュニケーター初期化処理を行う

引数:

*argc* main()の*argc*引数へのポインタ

*argv* main()の*argv*引数へのポインタ

**HECMW\_Comm HECMW\_comm\_get\_comm (void)**

コミュニケーターを返す

戻り値:

MPIコミュニケーター

**int HECMW\_comm\_get\_size (void)**

総領域数を返す

**int HECMW\_comm\_get\_rank (void)**

ランク番号を返す

**HECMW\_Group HECMW\_comm\_get\_group (void)**

MPIグループを返す.

戻り値:

MPIグループ

### **HECMW\_Fint HECMW\_comm\_c2f (HECMW\_Comm comm)**

CのコミュニケータをFortranのコミュニケータに変換する

引数:

*comm* Cのコミュニケータ

戻り値:

Fortranのコミュニケータを返す.

### **HECMW\_Comm HECMW\_comm\_f2c (HECMW\_Fint comm)**

FortranのコミュニケータをCのコミュニケータに変換する

引数:

*comm* Fortranのコミュニケータ

戻り値:

Cのコミュニケータを返す.

### **int HECMW\_comm\_is\_initialized (void)**

コミュニケータ初期化が行われているか否かを返す

戻り値:

初期化されていれば1を返し，そうでなければ0を返す.

## hecmw\_common.h

commonディレクトリ内のヘッダをインクルード

```
#include "hecmw_common_define.h"
#include "hecmw_etype.h"
#include "hecmw_debug_write_dist.h"
#include "hecmw_reorder.h"
```

---

### 説明

common ディレクトリ内のヘッダをインクルード  
削除予定

日付:

2004年2月16日

作者:

坂根 一彰

## hecmw\_common\_define.h

要素情報の定数定義

### マクロ定義

- #define **HECMW\_COMMON\_E\_ALLOCATION** 1111111
- #define **HECMW\_COMMON\_E\_OUT\_OF\_RANGE** 1111112
- #define **HECMW\_COMMON\_W\_NO\_EQN\_BLOCK** 1111113
- #define **HECMW\_ETYPE\_MAX** 966
- #define **HECMW\_ETYPE\_ROD1** 111
- #define **HECMW\_ETYPE\_ROD2** 112
- #define **HECMW\_ETYPE\_TRI1** 231
- #define **HECMW\_ETYPE\_TRI2** 232
- #define **HECMW\_ETYPE\_QUA1** 241
- #define **HECMW\_ETYPE\_QUA2** 242
- #define **HECMW\_ETYPE\_TET1** 341
- #define **HECMW\_ETYPE\_TET2** 342
- #define **HECMW\_ETYPE\_PRI1** 351
- #define **HECMW\_ETYPE\_PRI2** 352
- #define **HECMW\_ETYPE\_HEX1** 361
- #define **HECMW\_ETYPE\_HEX2** 362
- #define **HECMW\_ETYPE\_PYR1** 371
- #define **HECMW\_ETYPE\_PYR2** 372
- #define **HECMW\_ETYPE\_MST1** 431
- #define **HECMW\_ETYPE\_MST2** 432
- #define **HECMW\_ETYPE\_MSQ1** 441
- #define **HECMW\_ETYPE\_MSQ2** 442
- #define **HECMW\_ETYPE\_JTT1** 531
- #define **HECMW\_ETYPE\_JTT2** 532
- #define **HECMW\_ETYPE\_JTQ1** 541
- #define **HECMW\_ETYPE\_JTQ2** 542
- #define **HECMW\_ETYPE\_BEM1** 611



- #define **HECMW\_ETYPE\_BEM2** 612
- #define **HECMW\_ETYPE\_SHT1** 731
- #define **HECMW\_ETYPE\_SHT2** 732
- #define **HECMW\_ETYPE\_SHQ1** 741
- #define **HECMW\_ETYPE\_SHQ2** 742
- #define **HECMW\_ETYPE\_LN11** 911
- #define **HECMW\_ETYPE\_LN12** 912
- #define **HECMW\_ETYPE\_LN13** 913
- #define **HECMW\_ETYPE\_LN14** 914
- #define **HECMW\_ETYPE\_LN15** 915
- #define **HECMW\_ETYPE\_LN16** 916
- #define **HECMW\_ETYPE\_LN21** 921
- #define **HECMW\_ETYPE\_LN22** 922
- #define **HECMW\_ETYPE\_LN23** 923
- #define **HECMW\_ETYPE\_LN24** 924
- #define **HECMW\_ETYPE\_LN25** 925
- #define **HECMW\_ETYPE\_LN26** 926
- #define **HECMW\_ETYPE\_LN31** 931
- #define **HECMW\_ETYPE\_LN32** 932
- #define **HECMW\_ETYPE\_LN33** 933
- #define **HECMW\_ETYPE\_LN34** 934
- #define **HECMW\_ETYPE\_LN35** 935
- #define **HECMW\_ETYPE\_LN36** 936
- #define **HECMW\_ETYPE\_LN41** 941
- #define **HECMW\_ETYPE\_LN42** 942
- #define **HECMW\_ETYPE\_LN43** 943
- #define **HECMW\_ETYPE\_LN44** 944
- #define **HECMW\_ETYPE\_LN45** 945
- #define **HECMW\_ETYPE\_LN46** 946
- #define **HECMW\_ETYPE\_LN51** 951
- #define **HECMW\_ETYPE\_LN52** 952
- #define **HECMW\_ETYPE\_LN53** 953
- #define **HECMW\_ETYPE\_LN54** 954
- #define **HECMW\_ETYPE\_LN55** 955
- #define **HECMW\_ETYPE\_LN56** 956
- #define **HECMW\_ETYPE\_LN61** 961

- #define **HECMW\_ETYPE\_LN62** 962
- #define **HECMW\_ETYPE\_LN63** 963
- #define **HECMW\_ETYPE\_LN64** 964
- #define **HECMW\_ETYPE\_LN65** 965
- #define **HECMW\_ETYPE\_LN66** 966
- #define **HECMW\_GEOFEM\_ETYPE\_MAX** 722
- #define **HECMW\_GEOFEM\_ETYPE\_ROD1** 111
- #define **HECMW\_GEOFEM\_ETYPE\_ROD2** 112
- #define **HECMW\_GEOFEM\_ETYPE\_TRI1** 211
- #define **HECMW\_GEOFEM\_ETYPE\_TRI2** 212
- #define **HECMW\_GEOFEM\_ETYPE\_QUA1** 221
- #define **HECMW\_GEOFEM\_ETYPE\_QUA2** 222
- #define **HECMW\_GEOFEM\_ETYPE\_TET1** 311
- #define **HECMW\_GEOFEM\_ETYPE\_TET2** 312
- #define **HECMW\_GEOFEM\_ETYPE\_PRI1** 321
- #define **HECMW\_GEOFEM\_ETYPE\_PRI2** 322
- #define **HECMW\_GEOFEM\_ETYPE\_HEX1** 331
- #define **HECMW\_GEOFEM\_ETYPE\_HEX2** 332
- #define **HECMW\_GEOFEM\_ETYPE\_MST1** 411
- #define **HECMW\_GEOFEM\_ETYPE\_MST2** 412
- #define **HECMW\_GEOFEM\_ETYPE\_MSQ1** 421
- #define **HECMW\_GEOFEM\_ETYPE\_MSQ2** 422
- #define **HECMW\_GEOFEM\_ETYPE\_JTT1** 511
- #define **HECMW\_GEOFEM\_ETYPE\_JTT2** 512
- #define **HECMW\_GEOFEM\_ETYPE\_JTQ1** 521
- #define **HECMW\_GEOFEM\_ETYPE\_JTQ2** 522
- #define **HECMW\_GEOFEM\_ETYPE\_BEM1** 611
- #define **HECMW\_GEOFEM\_ETYPE\_BEM2** 612
- #define **HECMW\_GEOFEM\_ETYPE\_SHT1** 711
- #define **HECMW\_GEOFEM\_ETYPE\_SHT2** 712
- #define **HECMW\_GEOFEM\_ETYPE\_SHQ1** 721
- #define **HECMW\_GEOFEM\_ETYPE\_SHQ2** 722
- #define **HECMW\_MESH\_ETYPE\_MAX** 64
- #define **HECMW\_MESH\_ETYPE\_PNT** 0
- #define **HECMW\_MESH\_ETYPE\_ROD1** 1
- #define **HECMW\_MESH\_ETYPE\_ROD2** 2

- #define **HECMW\_MESH\_ETYPE\_TRI1** 3
- #define **HECMW\_MESH\_ETYPE\_TRI2** 4
- #define **HECMW\_MESH\_ETYPE\_QUA1** 5
- #define **HECMW\_MESH\_ETYPE\_QUA2** 6
- #define **HECMW\_MESH\_ETYPE\_TET1** 7
- #define **HECMW\_MESH\_ETYPE\_TET2** 8
- #define **HECMW\_MESH\_ETYPE\_PRI1** 9
- #define **HECMW\_MESH\_ETYPE\_PRI2** 10
- #define **HECMW\_MESH\_ETYPE\_HEX1** 11
- #define **HECMW\_MESH\_ETYPE\_HEX2** 12
- #define **HECMW\_MESH\_ETYPE\_PYR1** 13
- #define **HECMW\_MESH\_ETYPE\_PYR2** 14
- #define **HECMW\_MESH\_ETYPE\_MST1** 15
- #define **HECMW\_MESH\_ETYPE\_MST2** 16
- #define **HECMW\_MESH\_ETYPE\_MSQ1** 17
- #define **HECMW\_MESH\_ETYPE\_MSQ2** 18
- #define **HECMW\_MESH\_ETYPE\_JTT1** 19
- #define **HECMW\_MESH\_ETYPE\_JTT2** 20
- #define **HECMW\_MESH\_ETYPE\_JTQ1** 21
- #define **HECMW\_MESH\_ETYPE\_JTQ2** 22
- #define **HECMW\_MESH\_ETYPE\_BEM1** 23
- #define **HECMW\_MESH\_ETYPE\_BEM2** 24
- #define **HECMW\_MESH\_ETYPE\_SHT1** 25
- #define **HECMW\_MESH\_ETYPE\_SHT2** 26
- #define **HECMW\_MESH\_ETYPE\_SHQ1** 27
- #define **HECMW\_MESH\_ETYPE\_SHQ2** 28
- #define **HECMW\_MESH\_ETYPE\_LN11** 29
- #define **HECMW\_MESH\_ETYPE\_LN12** 30
- #define **HECMW\_MESH\_ETYPE\_LN13** 31
- #define **HECMW\_MESH\_ETYPE\_LN14** 32
- #define **HECMW\_MESH\_ETYPE\_LN15** 33
- #define **HECMW\_MESH\_ETYPE\_LN16** 34
- #define **HECMW\_MESH\_ETYPE\_LN21** 35
- #define **HECMW\_MESH\_ETYPE\_LN22** 36
- #define **HECMW\_MESH\_ETYPE\_LN23** 37
- #define **HECMW\_MESH\_ETYPE\_LN24** 38

- #define **HECMW\_MESH\_ETYPE\_LN25** 39
- #define **HECMW\_MESH\_ETYPE\_LN26** 40
- #define **HECMW\_MESH\_ETYPE\_LN31** 41
- #define **HECMW\_MESH\_ETYPE\_LN32** 42
- #define **HECMW\_MESH\_ETYPE\_LN33** 43
- #define **HECMW\_MESH\_ETYPE\_LN34** 44
- #define **HECMW\_MESH\_ETYPE\_LN35** 45
- #define **HECMW\_MESH\_ETYPE\_LN36** 46
- #define **HECMW\_MESH\_ETYPE\_LN41** 47
- #define **HECMW\_MESH\_ETYPE\_LN42** 48
- #define **HECMW\_MESH\_ETYPE\_LN43** 49
- #define **HECMW\_MESH\_ETYPE\_LN44** 50
- #define **HECMW\_MESH\_ETYPE\_LN45** 51
- #define **HECMW\_MESH\_ETYPE\_LN46** 52
- #define **HECMW\_MESH\_ETYPE\_LN51** 53
- #define **HECMW\_MESH\_ETYPE\_LN52** 54
- #define **HECMW\_MESH\_ETYPE\_LN53** 55
- #define **HECMW\_MESH\_ETYPE\_LN54** 56
- #define **HECMW\_MESH\_ETYPE\_LN55** 57
- #define **HECMW\_MESH\_ETYPE\_LN56** 58
- #define **HECMW\_MESH\_ETYPE\_LN61** 59
- #define **HECMW\_MESH\_ETYPE\_LN62** 60
- #define **HECMW\_MESH\_ETYPE\_LN63** 61
- #define **HECMW\_MESH\_ETYPE\_LN64** 62
- #define **HECMW\_MESH\_ETYPE\_LN65** 63
- #define **HECMW\_MESH\_ETYPE\_LN66** 64
- #define **HECMW\_UCD\_LABEL\_PNT** "pt"
- #define **HECMW\_UCD\_LABEL\_ROD1** "line"
- #define **HECMW\_UCD\_LABEL\_ROD2** "line2"
- #define **HECMW\_UCD\_LABEL\_TRI1** "tri"
- #define **HECMW\_UCD\_LABEL\_TRI2** "tri2"
- #define **HECMW\_UCD\_LABEL\_QUA1** "quad"
- #define **HECMW\_UCD\_LABEL\_QUA2** "quad2"
- #define **HECMW\_UCD\_LABEL\_TET1** "tet"
- #define **HECMW\_UCD\_LABEL\_TET2** "tet2"
- #define **HECMW\_UCD\_LABEL\_PRI1** "prism"

- #define **HECMW\_UCD\_LABEL\_PRI2** "prism2"
- #define **HECMW\_UCD\_LABEL\_HEX1** "hex"
- #define **HECMW\_UCD\_LABEL\_HEX2** "hex2"
- #define **HECMW\_UCD\_LABEL\_PYR1** "pyr"
- #define **HECMW\_UCD\_LABEL\_PYR2** "pyr2"
- #define **HECMW\_UCD\_LABEL\_MST1** "tet"
- #define **HECMW\_UCD\_LABEL\_MST2** "tet2"
- #define **HECMW\_UCD\_LABEL\_MSQ1** "pyr"
- #define **HECMW\_UCD\_LABEL\_MSQ2** "pyr2"
- #define **HECMW\_UCD\_LABEL\_JTT1** "pri"
- #define **HECMW\_UCD\_LABEL\_JTT2** "pri2"
- #define **HECMW\_UCD\_LABEL\_JTQ1** "hex"
- #define **HECMW\_UCD\_LABEL\_JTQ2** "hex2"
- #define **HECMW\_UCD\_LABEL\_BEM1** "line"
- #define **HECMW\_UCD\_LABEL\_BEM2** "line2"
- #define **HECMW\_UCD\_LABEL\_SHT1** "tri"
- #define **HECMW\_UCD\_LABEL\_SHT2** "tri2"
- #define **HECMW\_UCD\_LABEL\_SHQ1** "quad"
- #define **HECMW\_UCD\_LABEL\_SHQ2** "quad2"
- #define **HECMW\_UCD\_LABEL\_LN11** "line"
- #define **HECMW\_UCD\_LABEL\_LN12** "line"
- #define **HECMW\_UCD\_LABEL\_LN13** "line"
- #define **HECMW\_UCD\_LABEL\_LN14** "line"
- #define **HECMW\_UCD\_LABEL\_LN15** "line"
- #define **HECMW\_UCD\_LABEL\_LN16** "line"
- #define **HECMW\_UCD\_LABEL\_LN21** "line"
- #define **HECMW\_UCD\_LABEL\_LN22** "line"
- #define **HECMW\_UCD\_LABEL\_LN23** "line"
- #define **HECMW\_UCD\_LABEL\_LN24** "line"
- #define **HECMW\_UCD\_LABEL\_LN25** "line"
- #define **HECMW\_UCD\_LABEL\_LN26** "line"
- #define **HECMW\_UCD\_LABEL\_LN31** "line"
- #define **HECMW\_UCD\_LABEL\_LN32** "line"
- #define **HECMW\_UCD\_LABEL\_LN33** "line"
- #define **HECMW\_UCD\_LABEL\_LN34** "line"
- #define **HECMW\_UCD\_LABEL\_LN35** "line"

- #define **HECMW\_UCD\_LABEL\_LN36** "line"
- #define **HECMW\_UCD\_LABEL\_LN41** "line"
- #define **HECMW\_UCD\_LABEL\_LN42** "line"
- #define **HECMW\_UCD\_LABEL\_LN43** "line"
- #define **HECMW\_UCD\_LABEL\_LN44** "line"
- #define **HECMW\_UCD\_LABEL\_LN45** "line"
- #define **HECMW\_UCD\_LABEL\_LN46** "line"
- #define **HECMW\_UCD\_LABEL\_LN51** "line"
- #define **HECMW\_UCD\_LABEL\_LN52** "line"
- #define **HECMW\_UCD\_LABEL\_LN53** "line"
- #define **HECMW\_UCD\_LABEL\_LN54** "line"
- #define **HECMW\_UCD\_LABEL\_LN55** "line"
- #define **HECMW\_UCD\_LABEL\_LN56** "line"
- #define **HECMW\_UCD\_LABEL\_LN61** "line"
- #define **HECMW\_UCD\_LABEL\_LN62** "line"
- #define **HECMW\_UCD\_LABEL\_LN63** "line"
- #define **HECMW\_UCD\_LABEL\_LN64** "line"
- #define **HECMW\_UCD\_LABEL\_LN65** "line"
- #define **HECMW\_UCD\_LABEL\_LN66** "line"
- #define **HECMW\_MAX\_NODE\_MAX** 20
- #define **HECMW\_MAX\_NODE\_PNT** 1
- #define **HECMW\_MAX\_NODE\_ROD1** 2
- #define **HECMW\_MAX\_NODE\_ROD2** 3
- #define **HECMW\_MAX\_NODE\_TRI1** 3
- #define **HECMW\_MAX\_NODE\_TRI2** 6
- #define **HECMW\_MAX\_NODE\_QUA1** 4
- #define **HECMW\_MAX\_NODE\_QUA2** 8
- #define **HECMW\_MAX\_NODE\_TET1** 4
- #define **HECMW\_MAX\_NODE\_TET2** 10
- #define **HECMW\_MAX\_NODE\_PRI1** 6
- #define **HECMW\_MAX\_NODE\_PRI2** 15
- #define **HECMW\_MAX\_NODE\_HEX1** 8
- #define **HECMW\_MAX\_NODE\_HEX2** 20
- #define **HECMW\_MAX\_NODE\_PYR1** 5
- #define **HECMW\_MAX\_NODE\_PYR2** 13
- #define **HECMW\_MAX\_NODE\_MST1** 4

- #define **HECMW\_MAX\_NODE\_MST2** 7
- #define **HECMW\_MAX\_NODE\_MSQ1** 5
- #define **HECMW\_MAX\_NODE\_MSQ2** 9
- #define **HECMW\_MAX\_NODE\_JTT1** 6
- #define **HECMW\_MAX\_NODE\_JTT2** 12
- #define **HECMW\_MAX\_NODE\_JTQ1** 8
- #define **HECMW\_MAX\_NODE\_JTQ2** 16
- #define **HECMW\_MAX\_NODE\_BEM1** 2
- #define **HECMW\_MAX\_NODE\_BEM2** 3
- #define **HECMW\_MAX\_NODE\_SHT1** 3
- #define **HECMW\_MAX\_NODE\_SHT2** 6
- #define **HECMW\_MAX\_NODE\_SHQ1** 4
- #define **HECMW\_MAX\_NODE\_SHQ2** 8
- #define **HECMW\_MAX\_NODE\_LN11** 2
- #define **HECMW\_MAX\_NODE\_LN12** 2
- #define **HECMW\_MAX\_NODE\_LN13** 2
- #define **HECMW\_MAX\_NODE\_LN14** 2
- #define **HECMW\_MAX\_NODE\_LN15** 2
- #define **HECMW\_MAX\_NODE\_LN16** 2
- #define **HECMW\_MAX\_NODE\_LN21** 2
- #define **HECMW\_MAX\_NODE\_LN22** 2
- #define **HECMW\_MAX\_NODE\_LN23** 2
- #define **HECMW\_MAX\_NODE\_LN24** 2
- #define **HECMW\_MAX\_NODE\_LN25** 2
- #define **HECMW\_MAX\_NODE\_LN26** 2
- #define **HECMW\_MAX\_NODE\_LN31** 2
- #define **HECMW\_MAX\_NODE\_LN32** 2
- #define **HECMW\_MAX\_NODE\_LN33** 2
- #define **HECMW\_MAX\_NODE\_LN34** 2
- #define **HECMW\_MAX\_NODE\_LN35** 2
- #define **HECMW\_MAX\_NODE\_LN36** 2
- #define **HECMW\_MAX\_NODE\_LN41** 2
- #define **HECMW\_MAX\_NODE\_LN42** 2
- #define **HECMW\_MAX\_NODE\_LN43** 2
- #define **HECMW\_MAX\_NODE\_LN44** 2
- #define **HECMW\_MAX\_NODE\_LN45** 2

- #define **HECMW\_MAX\_NODE\_LN46** 2
- #define **HECMW\_MAX\_NODE\_LN51** 2
- #define **HECMW\_MAX\_NODE\_LN52** 2
- #define **HECMW\_MAX\_NODE\_LN53** 2
- #define **HECMW\_MAX\_NODE\_LN54** 2
- #define **HECMW\_MAX\_NODE\_LN55** 2
- #define **HECMW\_MAX\_NODE\_LN56** 2
- #define **HECMW\_MAX\_NODE\_LN61** 2
- #define **HECMW\_MAX\_NODE\_LN62** 2
- #define **HECMW\_MAX\_NODE\_LN63** 2
- #define **HECMW\_MAX\_NODE\_LN64** 2
- #define **HECMW\_MAX\_NODE\_LN65** 2
- #define **HECMW\_MAX\_NODE\_LN66** 2
- #define **HECMW\_MAX\_EDGE\_MAX** 24
- #define **HECMW\_MAX\_EDGE\_PNT** 0
- #define **HECMW\_MAX\_EDGE\_ROD1** 1
- #define **HECMW\_MAX\_EDGE\_ROD2** 2
- #define **HECMW\_MAX\_EDGE\_TRI1** 3
- #define **HECMW\_MAX\_EDGE\_TRI2** 6
- #define **HECMW\_MAX\_EDGE\_QUA1** 4
- #define **HECMW\_MAX\_EDGE\_QUA2** 8
- #define **HECMW\_MAX\_EDGE\_TET1** 6
- #define **HECMW\_MAX\_EDGE\_TET2** 12
- #define **HECMW\_MAX\_EDGE\_PRI1** 9
- #define **HECMW\_MAX\_EDGE\_PRI2** 18
- #define **HECMW\_MAX\_EDGE\_HEX1** 12
- #define **HECMW\_MAX\_EDGE\_HEX2** 24
- #define **HECMW\_MAX\_EDGE\_PYR1** 8
- #define **HECMW\_MAX\_EDGE\_PYR2** 16
- #define **HECMW\_MAX\_EDGE\_MST1** 6
- #define **HECMW\_MAX\_EDGE\_MST2** 9
- #define **HECMW\_MAX\_EDGE\_MSQ1** 8
- #define **HECMW\_MAX\_EDGE\_MSQ2** 12
- #define **HECMW\_MAX\_EDGE\_JTT1** 9
- #define **HECMW\_MAX\_EDGE\_JTT2** 15
- #define **HECMW\_MAX\_EDGE\_JTQ1** 12



- #define **HECMW\_MAX\_EDGE\_JTQ2** 18
- #define **HECMW\_MAX\_EDGE\_BEM1** 1
- #define **HECMW\_MAX\_EDGE\_BEM2** 2
- #define **HECMW\_MAX\_EDGE\_SHT1** 3
- #define **HECMW\_MAX\_EDGE\_SHT2** 6
- #define **HECMW\_MAX\_EDGE\_SHQ1** 4
- #define **HECMW\_MAX\_EDGE\_SHQ2** 8
- #define **HECMW\_MAX\_EDGE\_LN11** 1
- #define **HECMW\_MAX\_EDGE\_LN12** 1
- #define **HECMW\_MAX\_EDGE\_LN13** 1
- #define **HECMW\_MAX\_EDGE\_LN14** 1
- #define **HECMW\_MAX\_EDGE\_LN15** 1
- #define **HECMW\_MAX\_EDGE\_LN16** 1
- #define **HECMW\_MAX\_EDGE\_LN21** 1
- #define **HECMW\_MAX\_EDGE\_LN22** 1
- #define **HECMW\_MAX\_EDGE\_LN23** 1
- #define **HECMW\_MAX\_EDGE\_LN24** 1
- #define **HECMW\_MAX\_EDGE\_LN25** 1
- #define **HECMW\_MAX\_EDGE\_LN26** 1
- #define **HECMW\_MAX\_EDGE\_LN31** 1
- #define **HECMW\_MAX\_EDGE\_LN32** 1
- #define **HECMW\_MAX\_EDGE\_LN33** 1
- #define **HECMW\_MAX\_EDGE\_LN34** 1
- #define **HECMW\_MAX\_EDGE\_LN35** 1
- #define **HECMW\_MAX\_EDGE\_LN36** 1
- #define **HECMW\_MAX\_EDGE\_LN41** 1
- #define **HECMW\_MAX\_EDGE\_LN42** 1
- #define **HECMW\_MAX\_EDGE\_LN43** 1
- #define **HECMW\_MAX\_EDGE\_LN44** 1
- #define **HECMW\_MAX\_EDGE\_LN45** 1
- #define **HECMW\_MAX\_EDGE\_LN46** 1
- #define **HECMW\_MAX\_EDGE\_LN51** 1
- #define **HECMW\_MAX\_EDGE\_LN52** 1
- #define **HECMW\_MAX\_EDGE\_LN53** 1
- #define **HECMW\_MAX\_EDGE\_LN54** 1
- #define **HECMW\_MAX\_EDGE\_LN55** 1

- #define **HECMW\_MAX\_EDGE\_LN56** 1
- #define **HECMW\_MAX\_EDGE\_LN61** 1
- #define **HECMW\_MAX\_EDGE\_LN62** 1
- #define **HECMW\_MAX\_EDGE\_LN63** 1
- #define **HECMW\_MAX\_EDGE\_LN64** 1
- #define **HECMW\_MAX\_EDGE\_LN65** 1
- #define **HECMW\_MAX\_EDGE\_LN66** 1
- #define **HECMW\_MAX\_SURF\_MAX** 6
- #define **HECMW\_MAX\_SURF\_PNT** 0
- #define **HECMW\_MAX\_SURF\_ROD1** 0
- #define **HECMW\_MAX\_SURF\_ROD2** 0
- #define **HECMW\_MAX\_SURF\_TRI1** 3
- #define **HECMW\_MAX\_SURF\_TRI2** 3
- #define **HECMW\_MAX\_SURF\_QUA1** 4
- #define **HECMW\_MAX\_SURF\_QUA2** 4
- #define **HECMW\_MAX\_SURF\_TET1** 4
- #define **HECMW\_MAX\_SURF\_TET2** 4
- #define **HECMW\_MAX\_SURF\_PRI1** 5
- #define **HECMW\_MAX\_SURF\_PRI2** 5
- #define **HECMW\_MAX\_SURF\_HEX1** 6
- #define **HECMW\_MAX\_SURF\_HEX2** 6
- #define **HECMW\_MAX\_SURF\_PYR1** 5
- #define **HECMW\_MAX\_SURF\_PYR2** 5
- #define **HECMW\_MAX\_SURF\_MST1** 1
- #define **HECMW\_MAX\_SURF\_MST2** 1
- #define **HECMW\_MAX\_SURF\_MSQ1** 1
- #define **HECMW\_MAX\_SURF\_MSQ2** 1
- #define **HECMW\_MAX\_SURF\_JTT1** 2
- #define **HECMW\_MAX\_SURF\_JTT2** 2
- #define **HECMW\_MAX\_SURF\_JTQ1** 2
- #define **HECMW\_MAX\_SURF\_JTQ2** 2
- #define **HECMW\_MAX\_SURF\_BEM1** 0
- #define **HECMW\_MAX\_SURF\_BEM2** 0
- #define **HECMW\_MAX\_SURF\_SHT1** 2
- #define **HECMW\_MAX\_SURF\_SHT2** 2
- #define **HECMW\_MAX\_SURF\_SHQ1** 2

- #define **HECMW\_MAX\_SURF\_SHQ2** 2
- #define **HECMW\_MAX\_SURF\_LN11** 0
- #define **HECMW\_MAX\_SURF\_LN12** 0
- #define **HECMW\_MAX\_SURF\_LN13** 0
- #define **HECMW\_MAX\_SURF\_LN14** 0
- #define **HECMW\_MAX\_SURF\_LN15** 0
- #define **HECMW\_MAX\_SURF\_LN16** 0
- #define **HECMW\_MAX\_SURF\_LN21** 0
- #define **HECMW\_MAX\_SURF\_LN22** 0
- #define **HECMW\_MAX\_SURF\_LN23** 0
- #define **HECMW\_MAX\_SURF\_LN24** 0
- #define **HECMW\_MAX\_SURF\_LN25** 0
- #define **HECMW\_MAX\_SURF\_LN26** 0
- #define **HECMW\_MAX\_SURF\_LN31** 0
- #define **HECMW\_MAX\_SURF\_LN32** 0
- #define **HECMW\_MAX\_SURF\_LN33** 0
- #define **HECMW\_MAX\_SURF\_LN34** 0
- #define **HECMW\_MAX\_SURF\_LN35** 0
- #define **HECMW\_MAX\_SURF\_LN36** 0
- #define **HECMW\_MAX\_SURF\_LN41** 0
- #define **HECMW\_MAX\_SURF\_LN42** 0
- #define **HECMW\_MAX\_SURF\_LN43** 0
- #define **HECMW\_MAX\_SURF\_LN44** 0
- #define **HECMW\_MAX\_SURF\_LN45** 0
- #define **HECMW\_MAX\_SURF\_LN46** 0
- #define **HECMW\_MAX\_SURF\_LN51** 0
- #define **HECMW\_MAX\_SURF\_LN52** 0
- #define **HECMW\_MAX\_SURF\_LN53** 0
- #define **HECMW\_MAX\_SURF\_LN54** 0
- #define **HECMW\_MAX\_SURF\_LN55** 0
- #define **HECMW\_MAX\_SURF\_LN56** 0
- #define **HECMW\_MAX\_SURF\_LN61** 0
- #define **HECMW\_MAX\_SURF\_LN62** 0
- #define **HECMW\_MAX\_SURF\_LN63** 0
- #define **HECMW\_MAX\_SURF\_LN64** 0
- #define **HECMW\_MAX\_SURF\_LN65** 0

- #define **HECMW\_MAX\_SURF\_LN66** 0
- #define **HECMW\_MAX\_TSUF\_MAX** 4
- #define **HECMW\_MAX\_TSUF\_PNT** 0
- #define **HECMW\_MAX\_TSUF\_ROD1** 0
- #define **HECMW\_MAX\_TSUF\_ROD2** 0
- #define **HECMW\_MAX\_TSUF\_TRI1** 0
- #define **HECMW\_MAX\_TSUF\_TRI2** 0
- #define **HECMW\_MAX\_TSUF\_QUA1** 0
- #define **HECMW\_MAX\_TSUF\_QUA2** 0
- #define **HECMW\_MAX\_TSUF\_TET1** 4
- #define **HECMW\_MAX\_TSUF\_TET2** 4
- #define **HECMW\_MAX\_TSUF\_PRI1** 2
- #define **HECMW\_MAX\_TSUF\_PRI2** 2
- #define **HECMW\_MAX\_TSUF\_HEX1** 0
- #define **HECMW\_MAX\_TSUF\_HEX2** 0
- #define **HECMW\_MAX\_TSUF\_PYR1** 4
- #define **HECMW\_MAX\_TSUF\_PYR2** 4
- #define **HECMW\_MAX\_TSUF\_MST1** 1
- #define **HECMW\_MAX\_TSUF\_MST2** 1
- #define **HECMW\_MAX\_TSUF\_MSQ1** 0
- #define **HECMW\_MAX\_TSUF\_MSQ2** 0
- #define **HECMW\_MAX\_TSUF\_JTT1** 2
- #define **HECMW\_MAX\_TSUF\_JTT2** 2
- #define **HECMW\_MAX\_TSUF\_JTQ1** 0
- #define **HECMW\_MAX\_TSUF\_JTQ2** 0
- #define **HECMW\_MAX\_TSUF\_BEM1** 0
- #define **HECMW\_MAX\_TSUF\_BEM2** 0
- #define **HECMW\_MAX\_TSUF\_SHT1** 2
- #define **HECMW\_MAX\_TSUF\_SHT2** 2
- #define **HECMW\_MAX\_TSUF\_SHQ1** 0
- #define **HECMW\_MAX\_TSUF\_SHQ2** 0
- #define **HECMW\_MAX\_TSUF\_LN11** 0
- #define **HECMW\_MAX\_TSUF\_LN12** 0
- #define **HECMW\_MAX\_TSUF\_LN13** 0
- #define **HECMW\_MAX\_TSUF\_LN14** 0
- #define **HECMW\_MAX\_TSUF\_LN15** 0

- #define **HECMW\_MAX\_TSUF\_LN16** 0
- #define **HECMW\_MAX\_TSUF\_LN21** 0
- #define **HECMW\_MAX\_TSUF\_LN22** 0
- #define **HECMW\_MAX\_TSUF\_LN23** 0
- #define **HECMW\_MAX\_TSUF\_LN24** 0
- #define **HECMW\_MAX\_TSUF\_LN25** 0
- #define **HECMW\_MAX\_TSUF\_LN26** 0
- #define **HECMW\_MAX\_TSUF\_LN31** 0
- #define **HECMW\_MAX\_TSUF\_LN32** 0
- #define **HECMW\_MAX\_TSUF\_LN33** 0
- #define **HECMW\_MAX\_TSUF\_LN34** 0
- #define **HECMW\_MAX\_TSUF\_LN35** 0
- #define **HECMW\_MAX\_TSUF\_LN36** 0
- #define **HECMW\_MAX\_TSUF\_LN41** 0
- #define **HECMW\_MAX\_TSUF\_LN42** 0
- #define **HECMW\_MAX\_TSUF\_LN43** 0
- #define **HECMW\_MAX\_TSUF\_LN44** 0
- #define **HECMW\_MAX\_TSUF\_LN45** 0
- #define **HECMW\_MAX\_TSUF\_LN46** 0
- #define **HECMW\_MAX\_TSUF\_LN51** 0
- #define **HECMW\_MAX\_TSUF\_LN52** 0
- #define **HECMW\_MAX\_TSUF\_LN53** 0
- #define **HECMW\_MAX\_TSUF\_LN54** 0
- #define **HECMW\_MAX\_TSUF\_LN55** 0
- #define **HECMW\_MAX\_TSUF\_LN56** 0
- #define **HECMW\_MAX\_TSUF\_LN61** 0
- #define **HECMW\_MAX\_TSUF\_LN62** 0
- #define **HECMW\_MAX\_TSUF\_LN63** 0
- #define **HECMW\_MAX\_TSUF\_LN64** 0
- #define **HECMW\_MAX\_TSUF\_LN65** 0
- #define **HECMW\_MAX\_TSUF\_LN66** 0
- #define **HECMW\_MAX\_QSUF\_MAX** 6
- #define **HECMW\_MAX\_QSUF\_PNT** 0
- #define **HECMW\_MAX\_QSUF\_ROD1** 0
- #define **HECMW\_MAX\_QSUF\_ROD2** 0
- #define **HECMW\_MAX\_QSUF\_TRI1** 0

- #define **HECMW\_MAX\_QSUF\_TRI2** 0
- #define **HECMW\_MAX\_QSUF\_QUA1** 0
- #define **HECMW\_MAX\_QSUF\_QUA2** 0
- #define **HECMW\_MAX\_QSUF\_TET1** 0
- #define **HECMW\_MAX\_QSUF\_TET2** 0
- #define **HECMW\_MAX\_QSUF\_PRI1** 3
- #define **HECMW\_MAX\_QSUF\_PRI2** 3
- #define **HECMW\_MAX\_QSUF\_HEX1** 6
- #define **HECMW\_MAX\_QSUF\_HEX2** 6
- #define **HECMW\_MAX\_QSUF\_PYR1** 1
- #define **HECMW\_MAX\_QSUF\_PYR2** 1
- #define **HECMW\_MAX\_QSUF\_MST1** 0
- #define **HECMW\_MAX\_QSUF\_MST2** 0
- #define **HECMW\_MAX\_QSUF\_MSQ1** 1
- #define **HECMW\_MAX\_QSUF\_MSQ2** 1
- #define **HECMW\_MAX\_QSUF\_JTT1** 0
- #define **HECMW\_MAX\_QSUF\_JTT2** 0
- #define **HECMW\_MAX\_QSUF\_JTQ1** 2
- #define **HECMW\_MAX\_QSUF\_JTQ2** 2
- #define **HECMW\_MAX\_QSUF\_BEM1** 0
- #define **HECMW\_MAX\_QSUF\_BEM2** 0
- #define **HECMW\_MAX\_QSUF\_SHT1** 0
- #define **HECMW\_MAX\_QSUF\_SHT2** 0
- #define **HECMW\_MAX\_QSUF\_SHQ1** 2
- #define **HECMW\_MAX\_QSUF\_SHQ2** 2
- #define **HECMW\_MAX\_QSUF\_LN11** 0
- #define **HECMW\_MAX\_QSUF\_LN12** 0
- #define **HECMW\_MAX\_QSUF\_LN13** 0
- #define **HECMW\_MAX\_QSUF\_LN14** 0
- #define **HECMW\_MAX\_QSUF\_LN15** 0
- #define **HECMW\_MAX\_QSUF\_LN16** 0
- #define **HECMW\_MAX\_QSUF\_LN21** 0
- #define **HECMW\_MAX\_QSUF\_LN22** 0
- #define **HECMW\_MAX\_QSUF\_LN23** 0
- #define **HECMW\_MAX\_QSUF\_LN24** 0
- #define **HECMW\_MAX\_QSUF\_LN25** 0

- #define **HECMW\_MAX\_QSUF\_LN26** 0
- #define **HECMW\_MAX\_QSUF\_LN31** 0
- #define **HECMW\_MAX\_QSUF\_LN32** 0
- #define **HECMW\_MAX\_QSUF\_LN33** 0
- #define **HECMW\_MAX\_QSUF\_LN34** 0
- #define **HECMW\_MAX\_QSUF\_LN35** 0
- #define **HECMW\_MAX\_QSUF\_LN36** 0
- #define **HECMW\_MAX\_QSUF\_LN41** 0
- #define **HECMW\_MAX\_QSUF\_LN42** 0
- #define **HECMW\_MAX\_QSUF\_LN43** 0
- #define **HECMW\_MAX\_QSUF\_LN44** 0
- #define **HECMW\_MAX\_QSUF\_LN45** 0
- #define **HECMW\_MAX\_QSUF\_LN46** 0
- #define **HECMW\_MAX\_QSUF\_LN51** 0
- #define **HECMW\_MAX\_QSUF\_LN52** 0
- #define **HECMW\_MAX\_QSUF\_LN53** 0
- #define **HECMW\_MAX\_QSUF\_LN54** 0
- #define **HECMW\_MAX\_QSUF\_LN55** 0
- #define **HECMW\_MAX\_QSUF\_LN56** 0
- #define **HECMW\_MAX\_QSUF\_LN61** 0
- #define **HECMW\_MAX\_QSUF\_LN62** 0
- #define **HECMW\_MAX\_QSUF\_LN63** 0
- #define **HECMW\_MAX\_QSUF\_LN64** 0
- #define **HECMW\_MAX\_QSUF\_LN65** 0
- #define **HECMW\_MAX\_QSUF\_LN66** 0
- #define **HECMW\_MESH\_NDOFGRP\_MAX** 3
- #define **HECMW\_MESH\_DOF\_MAX** 6
- #define **HECMW\_MESH\_DOF\_TOT** 3
- #define **HECMW\_MESH\_DOF\_TWO** 2
- #define **HECMW\_MESH\_DOF\_THREE** 3
- #define **HECMW\_MESH\_DOF\_SIX** 6

---

## 説明

要素情報の定数定義

日付:

2004年2月16日

作者:

坂根 一彰

---

## マクロ定義

```
#define HECMW_COMMON_E_ALLOCATION 1111111
```

```
#define HECMW_COMMON_E_OUT_OF_RANGE 1111112
```

```
#define HECMW_COMMON_W_NO_EQN_BLOCK 1111113
```

```
#define HECMW_ETYPE_MAX 966
```

```
#define HECMW_ETYPE_ROD1 111
```

```
#define HECMW_ETYPE_ROD2 112
```

```
#define HECMW_ETYPE_TRI1 231
```

```
#define HECMW_ETYPE_TRI2 232
```



**#define HECMW\_ETYPE\_QUA1 241**

**#define HECMW\_ETYPE\_QUA2 242**

**#define HECMW\_ETYPE\_TET1 341**

**#define HECMW\_ETYPE\_TET2 342**

**#define HECMW\_ETYPE\_PRI1 351**

**#define HECMW\_ETYPE\_PRI2 352**

**#define HECMW\_ETYPE\_HEX1 361**

**#define HECMW\_ETYPE\_HEX2 362**

**#define HECMW\_ETYPE\_PYR1 371**

**#define HECMW\_ETYPE\_PYR2 372**

**#define HECMW\_ETYPE\_MST1 431**

**#define HECMW\_ETYPE\_MST2 432**

**#define HECMW\_ETYPE\_MSQ1 441**

**#define HECMW\_ETYPE\_MSQ2 442**

**#define HECMW\_ETYPE\_JTT1 531**

**#define HECMW\_ETYPE\_JTT2 532**

**#define HECMW\_ETYPE\_JTQ1 541**

**#define HECMW\_ETYPE\_JTQ2 542**

**#define HECMW\_ETYPE\_BEM1 611**

**#define HECMW\_ETYPE\_BEM2 612**

**#define HECMW\_ETYPE\_SHT1 731**

**#define HECMW\_ETYPE\_SHT2 732**

**#define HECMW\_ETYPE\_SHQ1 741**

**#define HECMW\_ETYPE\_SHQ2 742**

**#define HECMW\_ETYPE\_LN11 911**

**#define HECMW\_ETYPE\_LN12 912**

**#define HECMW\_ETYPE\_LN13 913**

**#define HECMW\_ETYPE\_LN14 914**

**#define HECMW\_ETYPE\_LN15 915**

**#define HECMW\_ETYPE\_LN16 916**

**#define HECMW\_ETYPE\_LN21 921**

**#define HECMW\_ETYPE\_LN22 922**

**#define HECMW\_ETYPE\_LN23 923**

**#define HECMW\_ETYPE\_LN24 924**

**#define HECMW\_ETYPE\_LN25 925**

**#define HECMW\_ETYPE\_LN26 926**

**#define HECMW\_ETYPE\_LN31 931**

**#define HECMW\_ETYPE\_LN32 932**

**#define HECMW\_ETYPE\_LN33 933**

**#define HECMW\_ETYPE\_LN34 934**

**#define HECMW\_ETYPE\_LN35 935**

**#define HECMW\_ETYPE\_LN36 936**

**#define HECMW\_ETYPE\_LN41 941**

**#define HECMW\_ETYPE\_LN42 942**

**#define HECMW\_ETYPE\_LN43 943**

**#define HECMW\_ETYPE\_LN44 944**

**#define HECMW\_ETYPE\_LN45 945**

**#define HECMW\_ETYPE\_LN46 946**

**#define HECMW\_ETYPE\_LN51 951**

**#define HECMW\_ETYPE\_LN52 952**

**#define HECMW\_ETYPE\_LN53 953**

**#define HECMW\_ETYPE\_LN54 954**

**#define HECMW\_ETYPE\_LN55 955**

**#define HECMW\_ETYPE\_LN56 956**

**#define HECMW\_ETYPE\_LN61 961**

**#define HECMW\_ETYPE\_LN62 962**

**#define HECMW\_ETYPE\_LN63 963**

**#define HECMW\_ETYPE\_LN64 964**

**#define HECMW\_ETYPE\_LN65 965**

**#define HECMW\_ETYPE\_LN66 966**

**#define HECMW\_GEOFEM\_ETYPE\_MAX 722**

**#define HECMW\_GEOFEM\_ETYPE\_ROD1 111**

**#define HECMW\_GEOFEM\_ETYPE\_ROD2 112**

**#define HECMW\_GEOFEM\_ETYPE\_TRI1 211**

**#define HECMW\_GEOFEM\_ETYPE\_TRI2 212**

**#define HECMW\_GEOFEM\_ETYPE\_QUA1 221**

**#define HECMW\_GEOFEM\_ETYPE\_QUA2 222**

**#define HECMW\_GEOFEM\_ETYPE\_TET1 311**

**#define HECMW\_GEOFEM\_ETYPE\_TET2 312**

**#define HECMW\_GEOFEM\_ETYPE\_PRI1 321**

**#define HECMW\_GEOFEM\_ETYPE\_PRI2 322**

**#define HECMW\_GEOFEM\_ETYPE\_HEX1 331**

**#define HECMW\_GEOFEM\_ETYPE\_HEX2 332**

**#define HECMW\_GEOFEM\_ETYPE\_MST1 411**

**#define HECMW\_GEOFEM\_ETYPE\_MST2 412**

**#define HECMW\_GEOFEM\_ETYPE\_MSQ1 421**

**#define HECMW\_GEOFEM\_ETYPE\_MSQ2 422**

**#define HECMW\_GEOFEM\_ETYPE\_JTT1 511**

**#define HECMW\_GEOFEM\_ETYPE\_JTT2 512**

**#define HECMW\_GEOFEM\_ETYPE\_JTQ1 521**

**#define HECMW\_GEOFEM\_ETYPE\_JTQ2 522**

**#define HECMW\_GEOFEM\_ETYPE\_BEM1 611**

**#define HECMW\_GEOFEM\_ETYPE\_BEM2 612**

**#define HECMW\_GEOFEM\_ETYPE\_SHT1 711**

**#define HECMW\_GEOFEM\_ETYPE\_SHT2 712**

**#define HECMW\_GEOFEM\_ETYPE\_SHQ1 721**

**#define HECMW\_GEOFEM\_ETYPE\_SHQ2 722**

**#define HECMW\_MESH\_ETYPE\_MAX 64**

**#define HECMW\_MESH\_ETYPE\_PNT 0**

**#define HECMW\_MESH\_ETYPE\_ROD1 1**

**#define HECMW\_MESH\_ETYPE\_ROD2 2**

**#define HECMW\_MESH\_ETYPE\_TRI1 3**



**#define HECMW\_MESH\_ETYPE\_TRI2 4**

**#define HECMW\_MESH\_ETYPE\_QUA1 5**

**#define HECMW\_MESH\_ETYPE\_QUA2 6**

**#define HECMW\_MESH\_ETYPE\_TET1 7**

**#define HECMW\_MESH\_ETYPE\_TET2 8**

**#define HECMW\_MESH\_ETYPE\_PRI1 9**

**#define HECMW\_MESH\_ETYPE\_PRI2 10**

**#define HECMW\_MESH\_ETYPE\_HEX1 11**

**#define HECMW\_MESH\_ETYPE\_HEX2 12**

**#define HECMW\_MESH\_ETYPE\_PYR1 13**

**#define HECMW\_MESH\_ETYPE\_PYR2 14**

**#define HECMW\_MESH\_ETYPE\_MST1 15**

**#define HECMW\_MESH\_ETYPE\_MST2 16**

**#define HECMW\_MESH\_ETYPE\_MSQ1 17**

**#define HECMW\_MESH\_ETYPE\_MSQ2 18**

**#define HECMW\_MESH\_ETYPE\_JTT1 19**

**#define HECMW\_MESH\_ETYPE\_JTT2 20**

**#define HECMW\_MESH\_ETYPE\_JTQ1 21**

**#define HECMW\_MESH\_ETYPE\_JTQ2 22**

**#define HECMW\_MESH\_ETYPE\_BEM1 23**

**#define HECMW\_MESH\_ETYPE\_BEM2 24**

**#define HECMW\_MESH\_ETYPE\_SHT1 25**

**#define HECMW\_MESH\_ETYPE\_SHT2 26**

**#define HECMW\_MESH\_ETYPE\_SHQ1 27**

**#define HECMW\_MESH\_ETYPE\_SHQ2 28**

**#define HECMW\_MESH\_ETYPE\_LN11 29**

**#define HECMW\_MESH\_ETYPE\_LN12 30**

**#define HECMW\_MESH\_ETYPE\_LN13 31**

**#define HECMW\_MESH\_ETYPE\_LN14 32**

**#define HECMW\_MESH\_ETYPE\_LN15 33**

**#define HECMW\_MESH\_ETYPE\_LN16 34**

**#define HECMW\_MESH\_ETYPE\_LN21 35**

**#define HECMW\_MESH\_ETYPE\_LN22 36**

**#define HECMW\_MESH\_ETYPE\_LN23 37**

**#define HECMW\_MESH\_ETYPE\_LN24 38**

**#define HECMW\_MESH\_ETYPE\_LN25 39**

**#define HECMW\_MESH\_ETYPE\_LN26 40**

**#define HECMW\_MESH\_ETYPE\_LN31 41**

**#define HECMW\_MESH\_ETYPE\_LN32 42**

**#define HECMW\_MESH\_ETYPE\_LN33 43**

**#define HECMW\_MESH\_ETYPE\_LN34 44**

**#define HECMW\_MESH\_ETYPE\_LN35 45**

**#define HECMW\_MESH\_ETYPE\_LN36 46**

**#define HECMW\_MESH\_ETYPE\_LN41 47**

**#define HECMW\_MESH\_ETYPE\_LN42 48**

**#define HECMW\_MESH\_ETYPE\_LN43 49**

**#define HECMW\_MESH\_ETYPE\_LN44 50**

**#define HECMW\_MESH\_ETYPE\_LN45 51**

**#define HECMW\_MESH\_ETYPE\_LN46 52**

**#define HECMW\_MESH\_ETYPE\_LN51 53**

**#define HECMW\_MESH\_ETYPE\_LN52 54**

**#define HECMW\_MESH\_ETYPE\_LN53 55**

**#define HECMW\_MESH\_ETYPE\_LN54 56**

**#define HECMW\_MESH\_ETYPE\_LN55 57**

**#define HECMW\_MESH\_ETYPE\_LN56 58**

**#define HECMW\_MESH\_ETYPE\_LN61 59**

**#define HECMW\_MESH\_ETYPE\_LN62 60**

**#define HECMW\_MESH\_ETYPE\_LN63 61**

**#define HECMW\_MESH\_ETYPE\_LN64 62**

**#define HECMW\_MESH\_ETYPE\_LN65 63**

**#define HECMW\_MESH\_ETYPE\_LN66 64**

**#define HECMW\_UCD\_LABEL\_PNT "pt"**

**#define HECMW\_UCD\_LABEL\_ROD1 "line"**

**#define HECMW\_UCD\_LABEL\_ROD2 "line2"**

**#define HECMW\_UCD\_LABEL\_TRI1 "tri"**

**#define HECMW\_UCD\_LABEL\_TRI2 "tri2"**

**#define HECMW\_UCD\_LABEL\_QUA1 "quad"**

**#define HECMW\_UCD\_LABEL\_QUA2 "quad2"**

**#define HECMW\_UCD\_LABEL\_TET1 "tet"**

**#define HECMW\_UCD\_LABEL\_TET2 "tet2"**

**#define HECMW\_UCD\_LABEL\_PRI1 "prism"**

**#define HECMW\_UCD\_LABEL\_PRI2 "prism2"**

**#define HECMW\_UCD\_LABEL\_HEX1 "hex"**

**#define HECMW\_UCD\_LABEL\_HEX2 "hex2"**

**#define HECMW\_UCD\_LABEL\_PYR1 "pyr"**

**#define HECMW\_UCD\_LABEL\_PYR2 "pyr2"**

**#define HECMW\_UCD\_LABEL\_MST1 "tet"**

**#define HECMW\_UCD\_LABEL\_MST2 "tet2"**

**#define HECMW\_UCD\_LABEL\_MSQ1 "pyr"**

**#define HECMW\_UCD\_LABEL\_MSQ2 "pyr2"**

**#define HECMW\_UCD\_LABEL\_JTT1 "pri"**

**#define HECMW\_UCD\_LABEL\_JTT2 "pri2"**

**#define HECMW\_UCD\_LABEL\_JTQ1 "hex"**

**#define HECMW\_UCD\_LABEL\_JTQ2 "hex2"**

**#define HECMW\_UCD\_LABEL\_BEM1 "line"**

**#define HECMW\_UCD\_LABEL\_BEM2 "line2"**

**#define HECMW\_UCD\_LABEL\_SHT1 "tri"**

**#define HECMW\_UCD\_LABEL\_SHT2 "tri2"**

**#define HECMW\_UCD\_LABEL\_SHQ1 "quad"**

**#define HECMW\_UCD\_LABEL\_SHQ2 "quad2"**

**#define HECMW\_UCD\_LABEL\_LN11 "line"**

**#define HECMW\_UCD\_LABEL\_LN12 "line"**



**#define HECMW\_UCD\_LABEL\_LN13 "line"**

**#define HECMW\_UCD\_LABEL\_LN14 "line"**

**#define HECMW\_UCD\_LABEL\_LN15 "line"**

**#define HECMW\_UCD\_LABEL\_LN16 "line"**

**#define HECMW\_UCD\_LABEL\_LN21 "line"**

**#define HECMW\_UCD\_LABEL\_LN22 "line"**

**#define HECMW\_UCD\_LABEL\_LN23 "line"**

**#define HECMW\_UCD\_LABEL\_LN24 "line"**

**#define HECMW\_UCD\_LABEL\_LN25 "line"**

**#define HECMW\_UCD\_LABEL\_LN26 "line"**

**#define HECMW\_UCD\_LABEL\_LN31 "line"**

**#define HECMW\_UCD\_LABEL\_LN32 "line"**

**#define HECMW\_UCD\_LABEL\_LN33 "line"**

**#define HECMW\_UCD\_LABEL\_LN34 "line"**

**#define HECMW\_UCD\_LABEL\_LN35 "line"**

**#define HECMW\_UCD\_LABEL\_LN36 "line"**

**#define HECMW\_UCD\_LABEL\_LN41 "line"**

**#define HECMW\_UCD\_LABEL\_LN42 "line"**

**#define HECMW\_UCD\_LABEL\_LN43 "line"**

**#define HECMW\_UCD\_LABEL\_LN44 "line"**

**#define HECMW\_UCD\_LABEL\_LN45 "line"**

**#define HECMW\_UCD\_LABEL\_LN46 "line"**

**#define HECMW\_UCD\_LABEL\_LN51 "line"**

**#define HECMW\_UCD\_LABEL\_LN52 "line"**

**#define HECMW\_UCD\_LABEL\_LN53 "line"**

**#define HECMW\_UCD\_LABEL\_LN54 "line"**

**#define HECMW\_UCD\_LABEL\_LN55 "line"**

**#define HECMW\_UCD\_LABEL\_LN56 "line"**

**#define HECMW\_UCD\_LABEL\_LN61 "line"**

**#define HECMW\_UCD\_LABEL\_LN62 "line"**

**#define HECMW\_UCD\_LABEL\_LN63 "line"**

**#define HECMW\_UCD\_LABEL\_LN64 "line"**

**#define HECMW\_UCD\_LABEL\_LN65 "line"**

**#define HECMW\_UCD\_LABEL\_LN66 "line"**

**#define HECMW\_MAX\_NODE\_MAX 20**

**#define HECMW\_MAX\_NODE\_PNT 1**

**#define HECMW\_MAX\_NODE\_ROD1 2**

**#define HECMW\_MAX\_NODE\_ROD2 3**

**#define HECMW\_MAX\_NODE\_TRI1 3**

**#define HECMW\_MAX\_NODE\_TRI2 6**

**#define HECMW\_MAX\_NODE\_QUA1 4**

**#define HECMW\_MAX\_NODE\_QUA2 8**

**#define HECMW\_MAX\_NODE\_TET1 4**

**#define HECMW\_MAX\_NODE\_TET2 10**

**#define HECMW\_MAX\_NODE\_PRI1 6**

**#define HECMW\_MAX\_NODE\_PRI2 15**

**#define HECMW\_MAX\_NODE\_HEX1 8**

**#define HECMW\_MAX\_NODE\_HEX2 20**

**#define HECMW\_MAX\_NODE\_PYR1 5**

**#define HECMW\_MAX\_NODE\_PYR2 13**

**#define HECMW\_MAX\_NODE\_MST1 4**

**#define HECMW\_MAX\_NODE\_MST2 7**

**#define HECMW\_MAX\_NODE\_MSQ1 5**

**#define HECMW\_MAX\_NODE\_MSQ2 9**

**#define HECMW\_MAX\_NODE\_JTT1 6**

**#define HECMW\_MAX\_NODE\_JTT2 12**

**#define HECMW\_MAX\_NODE\_JTQ1 8**

**#define HECMW\_MAX\_NODE\_JTQ2 16**

**#define HECMW\_MAX\_NODE\_BEM1 2**

**#define HECMW\_MAX\_NODE\_BEM2 3**

**#define HECMW\_MAX\_NODE\_SHT1 3**

**#define HECMW\_MAX\_NODE\_SHT2 6**

**#define HECMW\_MAX\_NODE\_SHQ1 4**

**#define HECMW\_MAX\_NODE\_SHQ2 8**

**#define HECMW\_MAX\_NODE\_LN11 2**

**#define HECMW\_MAX\_NODE\_LN12 2**

**#define HECMW\_MAX\_NODE\_LN13 2**

**#define HECMW\_MAX\_NODE\_LN14 2**

**#define HECMW\_MAX\_NODE\_LN15 2**

**#define HECMW\_MAX\_NODE\_LN16 2**

**#define HECMW\_MAX\_NODE\_LN21 2**

**#define HECMW\_MAX\_NODE\_LN22 2**

**#define HECMW\_MAX\_NODE\_LN23 2**

**#define HECMW\_MAX\_NODE\_LN24 2**

**#define HECMW\_MAX\_NODE\_LN25 2**

**#define HECMW\_MAX\_NODE\_LN26 2**

**#define HECMW\_MAX\_NODE\_LN31 2**

**#define HECMW\_MAX\_NODE\_LN32 2**

**#define HECMW\_MAX\_NODE\_LN33 2**

**#define HECMW\_MAX\_NODE\_LN34 2**

**#define HECMW\_MAX\_NODE\_LN35 2**

**#define HECMW\_MAX\_NODE\_LN36 2**

**#define HECMW\_MAX\_NODE\_LN41 2**

**#define HECMW\_MAX\_NODE\_LN42 2**

**#define HECMW\_MAX\_NODE\_LN43 2**

**#define HECMW\_MAX\_NODE\_LN44 2**

**#define HECMW\_MAX\_NODE\_LN45 2**

**#define HECMW\_MAX\_NODE\_LN46 2**

**#define HECMW\_MAX\_NODE\_LN51 2**

**#define HECMW\_MAX\_NODE\_LN52 2**

**#define HECMW\_MAX\_NODE\_LN53 2**

**#define HECMW\_MAX\_NODE\_LN54 2**



**#define HECMW\_MAX\_NODE\_LN55 2**

**#define HECMW\_MAX\_NODE\_LN56 2**

**#define HECMW\_MAX\_NODE\_LN61 2**

**#define HECMW\_MAX\_NODE\_LN62 2**

**#define HECMW\_MAX\_NODE\_LN63 2**

**#define HECMW\_MAX\_NODE\_LN64 2**

**#define HECMW\_MAX\_NODE\_LN65 2**

**#define HECMW\_MAX\_NODE\_LN66 2**

**#define HECMW\_MAX\_EDGE\_MAX 24**

**#define HECMW\_MAX\_EDGE\_PNT 0**

**#define HECMW\_MAX\_EDGE\_ROD1 1**

**#define HECMW\_MAX\_EDGE\_ROD2 2**

**#define HECMW\_MAX\_EDGE\_TRI1 3**

**#define HECMW\_MAX\_EDGE\_TRI2 6**

**#define HECMW\_MAX\_EDGE\_QUA1 4**

**#define HECMW\_MAX\_EDGE\_QUA2 8**

**#define HECMW\_MAX\_EDGE\_TET1 6**

**#define HECMW\_MAX\_EDGE\_TET2 12**

**#define HECMW\_MAX\_EDGE\_PRI1 9**

**#define HECMW\_MAX\_EDGE\_PRI2 18**

**#define HECMW\_MAX\_EDGE\_HEX1 12**

**#define HECMW\_MAX\_EDGE\_HEX2 24**

**#define HECMW\_MAX\_EDGE\_PYR1 8**

**#define HECMW\_MAX\_EDGE\_PYR2 16**

**#define HECMW\_MAX\_EDGE\_MST1 6**

**#define HECMW\_MAX\_EDGE\_MST2 9**

**#define HECMW\_MAX\_EDGE\_MSQ1 8**

**#define HECMW\_MAX\_EDGE\_MSQ2 12**

**#define HECMW\_MAX\_EDGE\_JTT1 9**

**#define HECMW\_MAX\_EDGE\_JTT2 15**

**#define HECMW\_MAX\_EDGE\_JTQ1 12**

**#define HECMW\_MAX\_EDGE\_JTQ2 18**

**#define HECMW\_MAX\_EDGE\_BEM1 1**

**#define HECMW\_MAX\_EDGE\_BEM2 2**

**#define HECMW\_MAX\_EDGE\_SHT1 3**

**#define HECMW\_MAX\_EDGE\_SHT2 6**

**#define HECMW\_MAX\_EDGE\_SHQ1 4**

**#define HECMW\_MAX\_EDGE\_SHQ2 8**

**#define HECMW\_MAX\_EDGE\_LN11 1**

**#define HECMW\_MAX\_EDGE\_LN12 1**

**#define HECMW\_MAX\_EDGE\_LN13 1**

**#define HECMW\_MAX\_EDGE\_LN14 1**

**#define HECMW\_MAX\_EDGE\_LN15 1**

**#define HECMW\_MAX\_EDGE\_LN16 1**

**#define HECMW\_MAX\_EDGE\_LN21 1**

**#define HECMW\_MAX\_EDGE\_LN22 1**

**#define HECMW\_MAX\_EDGE\_LN23 1**

**#define HECMW\_MAX\_EDGE\_LN24 1**

**#define HECMW\_MAX\_EDGE\_LN25 1**

**#define HECMW\_MAX\_EDGE\_LN26 1**

**#define HECMW\_MAX\_EDGE\_LN31 1**

**#define HECMW\_MAX\_EDGE\_LN32 1**

**#define HECMW\_MAX\_EDGE\_LN33 1**

**#define HECMW\_MAX\_EDGE\_LN34 1**

**#define HECMW\_MAX\_EDGE\_LN35 1**

**#define HECMW\_MAX\_EDGE\_LN36 1**

**#define HECMW\_MAX\_EDGE\_LN41 1**

**#define HECMW\_MAX\_EDGE\_LN42 1**

**#define HECMW\_MAX\_EDGE\_LN43 1**

**#define HECMW\_MAX\_EDGE\_LN44 1**

**#define HECMW\_MAX\_EDGE\_LN45 1**

**#define HECMW\_MAX\_EDGE\_LN46 1**

**#define HECMW\_MAX\_EDGE\_LN51 1**

**#define HECMW\_MAX\_EDGE\_LN52 1**

**#define HECMW\_MAX\_EDGE\_LN53 1**

**#define HECMW\_MAX\_EDGE\_LN54 1**

**#define HECMW\_MAX\_EDGE\_LN55 1**

**#define HECMW\_MAX\_EDGE\_LN56 1**

**#define HECMW\_MAX\_EDGE\_LN61 1**

**#define HECMW\_MAX\_EDGE\_LN62 1**

**#define HECMW\_MAX\_EDGE\_LN63 1**

**#define HECMW\_MAX\_EDGE\_LN64 1**

**#define HECMW\_MAX\_EDGE\_LN65 1**

**#define HECMW\_MAX\_EDGE\_LN66 1**

**#define HECMW\_MAX\_SURF\_MAX 6**

**#define HECMW\_MAX\_SURF\_PNT 0**

**#define HECMW\_MAX\_SURF\_ROD1 0**

**#define HECMW\_MAX\_SURF\_ROD2 0**

**#define HECMW\_MAX\_SURF\_TRI1 3**

**#define HECMW\_MAX\_SURF\_TRI2 3**

**#define HECMW\_MAX\_SURF\_QUA1 4**

**#define HECMW\_MAX\_SURF\_QUA2 4**

**#define HECMW\_MAX\_SURF\_TET1 4**

**#define HECMW\_MAX\_SURF\_TET2 4**

**#define HECMW\_MAX\_SURF\_PRI1 5**

**#define HECMW\_MAX\_SURF\_PRI2 5**

**#define HECMW\_MAX\_SURF\_HEX1 6**

**#define HECMW\_MAX\_SURF\_HEX2 6**

**#define HECMW\_MAX\_SURF\_PYR1 5**

**#define HECMW\_MAX\_SURF\_PYR2 5**

**#define HECMW\_MAX\_SURF\_MST1 1**

**#define HECMW\_MAX\_SURF\_MST2 1**



**#define HECMW\_MAX\_SURF\_MSQ1 1**

**#define HECMW\_MAX\_SURF\_MSQ2 1**

**#define HECMW\_MAX\_SURF\_JTT1 2**

**#define HECMW\_MAX\_SURF\_JTT2 2**

**#define HECMW\_MAX\_SURF\_JTQ1 2**

**#define HECMW\_MAX\_SURF\_JTQ2 2**

**#define HECMW\_MAX\_SURF\_BEM1 0**

**#define HECMW\_MAX\_SURF\_BEM2 0**

**#define HECMW\_MAX\_SURF\_SHT1 2**

**#define HECMW\_MAX\_SURF\_SHT2 2**

**#define HECMW\_MAX\_SURF\_SHQ1 2**

**#define HECMW\_MAX\_SURF\_SHQ2 2**

**#define HECMW\_MAX\_SURF\_LN11 0**

**#define HECMW\_MAX\_SURF\_LN12 0**

**#define HECMW\_MAX\_SURF\_LN13 0**

**#define HECMW\_MAX\_SURF\_LN14 0**

**#define HECMW\_MAX\_SURF\_LN15 0**

**#define HECMW\_MAX\_SURF\_LN16 0**

**#define HECMW\_MAX\_SURF\_LN21 0**

**#define HECMW\_MAX\_SURF\_LN22 0**

**#define HECMW\_MAX\_SURF\_LN23 0**

**#define HECMW\_MAX\_SURF\_LN24 0**

**#define HECMW\_MAX\_SURF\_LN25 0**

**#define HECMW\_MAX\_SURF\_LN26 0**

**#define HECMW\_MAX\_SURF\_LN31 0**

**#define HECMW\_MAX\_SURF\_LN32 0**

**#define HECMW\_MAX\_SURF\_LN33 0**

**#define HECMW\_MAX\_SURF\_LN34 0**

**#define HECMW\_MAX\_SURF\_LN35 0**

**#define HECMW\_MAX\_SURF\_LN36 0**

**#define HECMW\_MAX\_SURF\_LN41 0**

**#define HECMW\_MAX\_SURF\_LN42 0**

**#define HECMW\_MAX\_SURF\_LN43 0**

**#define HECMW\_MAX\_SURF\_LN44 0**

**#define HECMW\_MAX\_SURF\_LN45 0**

**#define HECMW\_MAX\_SURF\_LN46 0**

**#define HECMW\_MAX\_SURF\_LN51 0**

**#define HECMW\_MAX\_SURF\_LN52 0**

**#define HECMW\_MAX\_SURF\_LN53 0**

**#define HECMW\_MAX\_SURF\_LN54 0**

**#define HECMW\_MAX\_SURF\_LN55 0**

**#define HECMW\_MAX\_SURF\_LN56 0**

**#define HECMW\_MAX\_SURF\_LN61 0**

**#define HECMW\_MAX\_SURF\_LN62 0**

**#define HECMW\_MAX\_SURF\_LN63 0**

**#define HECMW\_MAX\_SURF\_LN64 0**

**#define HECMW\_MAX\_SURF\_LN65 0**

**#define HECMW\_MAX\_SURF\_LN66 0**

**#define HECMW\_MAX\_TSUF\_MAX 4**

**#define HECMW\_MAX\_TSUF\_PNT 0**

**#define HECMW\_MAX\_TSUF\_ROD1 0**

**#define HECMW\_MAX\_TSUF\_ROD2 0**

**#define HECMW\_MAX\_TSUF\_TRI1 0**

**#define HECMW\_MAX\_TSUF\_TRI2 0**

**#define HECMW\_MAX\_TSUF\_QUA1 0**

**#define HECMW\_MAX\_TSUF\_QUA2 0**

**#define HECMW\_MAX\_TSUF\_TET1 4**

**#define HECMW\_MAX\_TSUF\_TET2 4**

**#define HECMW\_MAX\_TSUF\_PRI1 2**

**#define HECMW\_MAX\_TSUF\_PRI2 2**

**#define HECMW\_MAX\_TSUF\_HEX1 0**

**#define HECMW\_MAX\_TSUF\_HEX2 0**

**#define HECMW\_MAX\_TSUF\_PYR1 4**

**#define HECMW\_MAX\_TSUF\_PYR2 4**

**#define HECMW\_MAX\_TSUF\_MST1 1**

**#define HECMW\_MAX\_TSUF\_MST2 1**

**#define HECMW\_MAX\_TSUF\_MSQ1 0**

**#define HECMW\_MAX\_TSUF\_MSQ2 0**

**#define HECMW\_MAX\_TSUF\_JTT1 2**

**#define HECMW\_MAX\_TSUF\_JTT2 2**

**#define HECMW\_MAX\_TSUF\_JTQ1 0**

**#define HECMW\_MAX\_TSUF\_JTQ2 0**

**#define HECMW\_MAX\_TSUF\_BEM1 0**

**#define HECMW\_MAX\_TSUF\_BEM2 0**

**#define HECMW\_MAX\_TSUF\_SHT1 2**

**#define HECMW\_MAX\_TSUF\_SHT2 2**

**#define HECMW\_MAX\_TSUF\_SHQ1 0**

**#define HECMW\_MAX\_TSUF\_SHQ2 0**

**#define HECMW\_MAX\_TSUF\_LN11 0**

**#define HECMW\_MAX\_TSUF\_LN12 0**

**#define HECMW\_MAX\_TSUF\_LN13 0**

**#define HECMW\_MAX\_TSUF\_LN14 0**

**#define HECMW\_MAX\_TSUF\_LN15 0**

**#define HECMW\_MAX\_TSUF\_LN16 0**

**#define HECMW\_MAX\_TSUF\_LN21 0**

**#define HECMW\_MAX\_TSUF\_LN22 0**

**#define HECMW\_MAX\_TSUF\_LN23 0**

**#define HECMW\_MAX\_TSUF\_LN24 0**

**#define HECMW\_MAX\_TSUF\_LN25 0**

**#define HECMW\_MAX\_TSUF\_LN26 0**

**#define HECMW\_MAX\_TSUF\_LN31 0**

**#define HECMW\_MAX\_TSUF\_LN32 0**



**#define HECMW\_MAX\_TSUF\_LN33 0**

**#define HECMW\_MAX\_TSUF\_LN34 0**

**#define HECMW\_MAX\_TSUF\_LN35 0**

**#define HECMW\_MAX\_TSUF\_LN36 0**

**#define HECMW\_MAX\_TSUF\_LN41 0**

**#define HECMW\_MAX\_TSUF\_LN42 0**

**#define HECMW\_MAX\_TSUF\_LN43 0**

**#define HECMW\_MAX\_TSUF\_LN44 0**

**#define HECMW\_MAX\_TSUF\_LN45 0**

**#define HECMW\_MAX\_TSUF\_LN46 0**

**#define HECMW\_MAX\_TSUF\_LN51 0**

**#define HECMW\_MAX\_TSUF\_LN52 0**

**#define HECMW\_MAX\_TSUF\_LN53 0**

**#define HECMW\_MAX\_TSUF\_LN54 0**

**#define HECMW\_MAX\_TSUF\_LN55 0**

**#define HECMW\_MAX\_TSUF\_LN56 0**

**#define HECMW\_MAX\_TSUF\_LN61 0**

**#define HECMW\_MAX\_TSUF\_LN62 0**

**#define HECMW\_MAX\_TSUF\_LN63 0**

**#define HECMW\_MAX\_TSUF\_LN64 0**

**#define HECMW\_MAX\_TSUF\_LN65 0**

**#define HECMW\_MAX\_TSUF\_LN66 0**

**#define HECMW\_MAX\_QSUF\_MAX 6**

**#define HECMW\_MAX\_QSUF\_PNT 0**

**#define HECMW\_MAX\_QSUF\_ROD1 0**

**#define HECMW\_MAX\_QSUF\_ROD2 0**

**#define HECMW\_MAX\_QSUF\_TRI1 0**

**#define HECMW\_MAX\_QSUF\_TRI2 0**

**#define HECMW\_MAX\_QSUF\_QUA1 0**

**#define HECMW\_MAX\_QSUF\_QUA2 0**

**#define HECMW\_MAX\_QSUF\_TET1 0**

**#define HECMW\_MAX\_QSUF\_TET2 0**

**#define HECMW\_MAX\_QSUF\_PRI1 3**

**#define HECMW\_MAX\_QSUF\_PRI2 3**

**#define HECMW\_MAX\_QSUF\_HEX1 6**

**#define HECMW\_MAX\_QSUF\_HEX2 6**

**#define HECMW\_MAX\_QSUF\_PYR1 1**

**#define HECMW\_MAX\_QSUF\_PYR2 1**

**#define HECMW\_MAX\_QSUF\_MST1 0**

**#define HECMW\_MAX\_QSUF\_MST2 0**

**#define HECMW\_MAX\_QSUF\_MSQ1 1**

**#define HECMW\_MAX\_QSUF\_MSQ2 1**

**#define HECMW\_MAX\_QSUF\_JTT1 0**

**#define HECMW\_MAX\_QSUF\_JTT2 0**

**#define HECMW\_MAX\_QSUF\_JTQ1 2**

**#define HECMW\_MAX\_QSUF\_JTQ2 2**

**#define HECMW\_MAX\_QSUF\_BEM1 0**

**#define HECMW\_MAX\_QSUF\_BEM2 0**

**#define HECMW\_MAX\_QSUF\_SHT1 0**

**#define HECMW\_MAX\_QSUF\_SHT2 0**

**#define HECMW\_MAX\_QSUF\_SHQ1 2**

**#define HECMW\_MAX\_QSUF\_SHQ2 2**

**#define HECMW\_MAX\_QSUF\_LN11 0**

**#define HECMW\_MAX\_QSUF\_LN12 0**

**#define HECMW\_MAX\_QSUF\_LN13 0**

**#define HECMW\_MAX\_QSUF\_LN14 0**

**#define HECMW\_MAX\_QSUF\_LN15 0**

**#define HECMW\_MAX\_QSUF\_LN16 0**

**#define HECMW\_MAX\_QSUF\_LN21 0**

**#define HECMW\_MAX\_QSUF\_LN22 0**

**#define HECMW\_MAX\_QSUF\_LN23 0**

**#define HECMW\_MAX\_QSUF\_LN24 0**

**#define HECMW\_MAX\_QSUF\_LN25 0**

**#define HECMW\_MAX\_QSUF\_LN26 0**

**#define HECMW\_MAX\_QSUF\_LN31 0**

**#define HECMW\_MAX\_QSUF\_LN32 0**

**#define HECMW\_MAX\_QSUF\_LN33 0**

**#define HECMW\_MAX\_QSUF\_LN34 0**

**#define HECMW\_MAX\_QSUF\_LN35 0**

**#define HECMW\_MAX\_QSUF\_LN36 0**

**#define HECMW\_MAX\_QSUF\_LN41 0**

**#define HECMW\_MAX\_QSUF\_LN42 0**

**#define HECMW\_MAX\_QSUF\_LN43 0**

**#define HECMW\_MAX\_QSUF\_LN44 0**

**#define HECMW\_MAX\_QSUF\_LN45 0**

**#define HECMW\_MAX\_QSUF\_LN46 0**

**#define HECMW\_MAX\_QSUF\_LN51 0**

**#define HECMW\_MAX\_QSUF\_LN52 0**

**#define HECMW\_MAX\_QSUF\_LN53 0**

**#define HECMW\_MAX\_QSUF\_LN54 0**

**#define HECMW\_MAX\_QSUF\_LN55 0**

**#define HECMW\_MAX\_QSUF\_LN56 0**

**#define HECMW\_MAX\_QSUF\_LN61 0**

**#define HECMW\_MAX\_QSUF\_LN62 0**

**#define HECMW\_MAX\_QSUF\_LN63 0**

**#define HECMW\_MAX\_QSUF\_LN64 0**

**#define HECMW\_MAX\_QSUF\_LN65 0**

**#define HECMW\_MAX\_QSUF\_LN66 0**

**#define HECMW\_MESH\_NDOFGRP\_MAX 3**

**#define HECMW\_MESH\_DOF\_MAX 6**

**#define HECMW\_MESH\_DOF\_TOT 3**

**#define HECMW\_MESH\_DOF\_TWO 2**



```
#define HECMW_MESH_DOF_THREE 3
```

```
#define HECMW_MESH_DOF_SIX 6
```

## hecmw\_config.h

HEC-MWで使用する定数等の定義.

```
#include "mpi.h"
```

### マクロ定義

- `#define HECMW_INT ((HECMW_Datatype)10001)`  
*MPI\_INT*をラップする.
- `#define HECMW_DOUBLE ((HECMW_Datatype)10002)`  
*MPI\_DOUBLE*をラップする.
- `#define HECMW_CHAR ((HECMW_Datatype)10003)`  
*MPI\_CHAR*をラップする.
- `#define HECMW_MIN ((HECMW_Op)20001)`  
*MPI\_MIN*をラップする.
- `#define HECMW_MAX ((HECMW_Op)20002)`  
*MPI\_MAX*をラップする.
- `#define HECMW_SUM ((HECMW_Op)20003)`  
*MPI\_SUM*をラップする.
- `#define HECMW_EXIT_SUCCESS 0`  
正常終了時の終了コード
- `#define HECMW_EXIT_ERROR 1`  
異常終了時の終了コード

- `#define HECMW_HEADER_LEN 127`  
ヘッダの最大長('¥0'は含まない)
- `#define HECMW_NAME_LEN 63`  
名前の最大長('¥0'は含まない)
- `#define HECMW_FILENAME_LEN 1023`  
ファイル名(パス)の最大長('¥0'は含まない)
- `#define HECMW_MSG_LEN 255`  
メッセージの最大長('¥0'は含まない)

## 型定義

- `typedef MPI_Comm HECMW_Comm`  
*MPI* コミュニケータをラップする.
- `typedef MPI_Group HECMW_Group`  
*MPI* グループをラップする.
- `typedef MPI_Request HECMW_Request`  
*MPI* リクエストハンドルをラップする.
- `typedef MPI_Status HECMW_Status`  
*MPI* ステータスオブジェクトをラップする.
- `typedef MPI_Datatype HECMW_Datatype`  
*MPI* データタイプをラップする.
- `typedef MPI_Op HECMW_Op`

*MPI* オペレーションをラップする.

- `typedef MPI_Fint HECMW_Fint`  
*MPI Fortran* コミュニケータをラップする.

---

## 説明

HEC-MW で使用される定数等の定義.

日付:

2004年2月16日

作者:

坂根 一彰

---

## マクロ定義

**#define HECMW\_INT ((HECMW\_Datatype)10001)**

*MPI\_INT* をラップする.

**#define HECMW\_DOUBLE ((HECMW\_Datatype)10002)**

*MPI\_DOUBLE* をラップする.

**#define HECMW\_CHAR ((HECMW\_Datatype)10003)**

*MPI\_CHAR* をラップする.

**#define HECMW\_MIN ((HECMW\_Op)20001)**

MPI\_MINをラップする.

**#define HECMW\_MAX ((HECMW\_Op)20002)**

MPI\_MAXをラップする.

**#define HECMW\_SUM ((HECMW\_Op)20003)**

MPI\_SUMをラップする.

**#define HECMW\_EXIT\_SUCCESS 0**

正常終了時の終了コード

**#define HECMW\_EXIT\_ERROR 1**

異常終了時の終了コード

**#define HECMW\_HEADER\_LEN 127**

ヘッダの最大長(¥0'は含まない)

**#define HECMW\_NAME\_LEN 63**

名前の最大長(¥0は含まない)

**#define HECMW\_FILENAME\_LEN 1023**

ファイル名(パス)の最大長(¥0は含まない)

**#define HECMW\_MSG\_LEN 255**

メッセージの最大長(¥0は含まない)

---

## 型定義

**typedef MPI\_Comm HECMW\_Comm**

MPIコミュニケーターをラップする.

**typedef MPI\_Group HECMW\_Group**

MPIグループをラップする.

**typedef MPI\_Request HECMW\_Request**

MPIリクエストハンドルをラップする.

**typedef MPI\_Status HECMW\_Status**

MPIステータスオブジェクトをラップする.

**typedef MPI\_Datatype HECMW\_Datatype**

MPIデータタイプをラップする.

**typedef MPI\_Op HECMW\_Op**

MPIオペレーションをラップする.

**typedef MPI\_Fint HECMW\_Fint**

MPI Fortran コミュニケータをラップする.

## hecmw\_control.h

全体制御ファイルの読み込みと，その情報取得を行う

### データ構造

- struct **hecmw\_ctrl\_meshfile**  
全体制御ファイルから取得したメッシュファイルの情報を格納する
- struct **hecmw\_ctrl\_meshfiles**  
メッシュ情報構造体

### マクロ定義

- #define **HECMW\_CTRL\_FILE** "hecmw\_ctrl.dat"  
デフォルトの全体制御ファイル名
- #define **HECMW\_CTRL\_FTYPE\_HECMW\_DIST** 1  
*TYPE=HECMW-DIST.*
- #define **HECMW\_CTRL\_FTYPE\_HECMW\_ENTIRE** 2  
*TYPE=HECMW-ENTIRE.*
- #define **HECMW\_CTRL\_FTYPE\_GEOFEM** 3  
*TYPE=GeoFE<.*
- #define **HECMW\_CTRL\_FTYPE\_ABAQUS** 4  
*TYPE=ABAQUS.*



- `#define HECMW_CTRL_FTYPE_NASTRAN 5`  
`TYPE=NASTRAN.`
- `#define HECMW_CTRL_FTYPE_FEMAP 6`  
`TYPE=FEMAP.`
- `#define HECMW_CTRL_FILE_IO_IN 1`  
`IO=IN.`
- `#define HECMW_CTRL_FILE_IO_OUT 2`  
`IO=OUT.`
- `#define HECMW_CTRL_FILE_IO_INOUT 4`  
`IO=INOUT.`

## 関数

- `int HECMW_ctrl_init (void)`  
全体制御ファイルの読み込みを行う
- `int HECMW_ctrl_finalize (void)`  
全体制御データの終了処理を行う
- `hecmw_ctrl_meshfiles * HECMW_ctrl_get_meshfiles (char *name_ID)`  
メッシュ情報を返す
- `hecmw_ctrl_meshfiles * HECMW_ctrl_get_meshfiles_header (char *name_ID)`  
メッシュ情報を返す
- `void HECMW_ctrl_free_meshfiles (struct hecmw_ctrl_meshfiles *meshfiles)`  
取得したメッシュ情報を解放する

- `char * HECMW_ctrl_get_restart_file (char *name_ID, char *buf, int bufsize)`  
リスタートファイル名を返す
- `char * HECMW_ctrl_get_restart_file_by_io (int io, char *buf, int bufsize)`  
リスタートファイル名を返す
- `char * HECMW_ctrl_get_result_file (char *name_ID, char *buf, int bufsize)`  
結果ファイル名を返す
- `char * HECMW_ctrl_get_result_fileheader (char *name_ID, char *buf, int bufsize)`  
結果ファイル名を返す
- `char * HECMW_ctrl_get_result_file_by_io (int io, char *buf, int bufsize)`  
結果ファイル名を返す
- `char * HECMW_ctrl_get_result_fileheader_by_io (int io, char *buf, int bufsize)`  
結果ファイル名を返す
- `char * HECMW_ctrl_get_control_file (char *name_ID, char *buf, int bufsize)`  
制御ファイル名を返す

---

## 説明

全体制御ファイルの読み込みと、その情報取得を行う

全体制御ファイルはパラメータを外部から容易に与えることを可能とする。これにより、実行時に必要な機能の制御を簡単に行うことができる。

全体制御ファイルはプログラムの実行カレントディレクトリに置く必要があり、そのファイル名は'`hecmw_ctrl.dat`'である。また、この読み込みは全体初期化処理によって自動的に行われる。

参照:

全体制御ファイル

日付:

2004年2月16日

作者:

坂根 一彰

---

## マクロ定義

**#define HECMW\_CTRL\_FILE "hecmw\_ctrl.dat"**

デフォルトの全体制御ファイル名

**#define HECMW\_CTRL\_FTYPE\_HECMW\_DIST 1**

TYPE=HECMW-DIST.

**#define HECMW\_CTRL\_FTYPE\_HECMW\_ENTIRE 2**

TYPE=HECMW-ENTIRE.

**#define HECMW\_CTRL\_FTYPE\_GEOFEM 3**

TYPE=GeoFE<.

**#define HECMW\_CTRL\_FTYPE\_ABAQUS 4**

TYPE=ABAQUS.

**#define HECMW\_CTRL\_FTYPE\_NASTRAN 5**

TYPE=NASTRAN.

**#define HECMW\_CTRL\_FTYPE\_FEMAP 6**

TYPE=FEMAP.

**#define HECMW\_CTRL\_FILE\_IO\_IN 1**

IO=IN.

**#define HECMW\_CTRL\_FILE\_IO\_OUT 2**

IO=OUT.

**#define HECMW\_CTRL\_FILE\_IO\_INOUT 4**

IO=INOUT.

---

関数

## **int HECMW\_ctrl\_init (void)**

全体制御ファイルの読み込みを行う

全体制御ファイルから全体制御データが読み込まれ、メモリ上に保持される。読み込まれる全体制御ファイルは、**HECMW\_CTRL\_FILE**で定義されるファイルである。

### **戻り値:**

成功すれば0を返す。失敗すれば-1を返し、HECMW\_set\_error()によってエラー情報がセットされる。

## **int HECMW\_ctrl\_finalize (void)**

全体制御データの終了処理を行う

メモリ上に保持されている全体制御データを解放する

### **戻り値:**

成功すれば0を返す。失敗すれば-1を返し、HECMW\_set\_error()によってエラー情報がセットされる。

## **struct hecmw\_ctrl\_meshfiles\* HECMW\_ctrl\_get\_meshfiles (char \* *name\_ID*)**

メッシュ情報を返す

全体制御データから、引数で示されるNAMEパラメータを持つ!MESHまたは!MESH GROUPの情報を取得して返す。メッシュファイル名には、必要に応じてランク番号(.rank)が自動的に付加される。ここで取得した情報は、必要でなくなった時点でHECMW\_free\_meshfiles()によって解放することができる。

### **引数:**

*name\_ID* 取得したい!MESHまたは!MESH GROUPのNAMEパラメータ

### **戻り値:**

成功すれば取得できたメッシュ情報を返す。失敗すればNULLを返し、  
HECMW\_set\_error()によってエラー情報がセットされる。

**参照:**

HECMW\_free\_meshfiles()

**struct hecmw\_ctrl\_meshfiles\* HECMW\_ctrl\_get\_meshfiles\_header (char \*  
name\_ID)**

メッシュ情報を返す

全体制御データから、引数で示されるNAMEパラメータを持つ!MESHまたは!MESH GROUP  
の情報を取得して返す。メッシュファイル名にランク番号は付加されない。ここで取得し  
た情報は、必要でなくなった時点でHECMW\_free\_meshfiles()によって解放することができる。

**引数:**

*name\_ID* 取得したい!MESHまたは!MESH GROUPのNAMEパラメータ

**戻り値:**

成功すれば取得できたメッシュ情報を返す。失敗すればNULLを返し、  
HECMW\_set\_error()によってエラー情報がセットされる。

**参照:**

HECMW\_free\_meshfiles()

**void HECMW\_ctrl\_free\_meshfiles (struct hecmw\_ctrl\_meshfiles \* *meshfiles*)**

取得したメッシュ情報を解放する

**引数:**

*meshfiles* 解放したいメッシュ情報へのポインタ

**char\* HECMW\_ctrl\_get\_restart\_file (char \* *name\_ID*, char \* *buf*, int *bufsize*)**

リスタートファイル名を返す

全体制御データから、引数で示されるNAMEパラメータを持つ!RESTARTのファイル名を取得して返す。ファイル名には、ランク番号(.rank)が自動的に付加される。

**引数:**

*name\_ID* 取得したい!RESTARTのNAMEパラメータ

*buf* 取得したファイル名を格納するバッファ領域。最大で

**HECMW\_FILENAME\_LEN+1**の大きさが必要である。 NULLを指定すると動的にメモリを確保しそれを格納先に使用する。

*bufsize* *buf*のサイズ。 *buf*がNULLの場合は何でもよい。

**戻り値:**

成功すれば取得できたリスタートファイル名へのポインタを返す。失敗すればNULLを返し、HECMW\_set\_error()によってエラー情報がセットされる。

**char\* HECMW\_ctrl\_get\_restart\_file\_by\_io (int *io*, char \* *buf*, int *bufsize*)**

リスタートファイル名を返す

全体制御データから、引数で示されるIOパラメータを持つ!RESTARTのうち、最初に見つかったもののファイル名を返す。ファイル名には、ランク番号(.rank)が自動的に付加される。

**引数:**

*io* 取得したい!RESTARTのIOパラメータ。対象とするIOパラメータが複数ある場合は、その論理和を指定すればよい。

*buf* 取得したファイル名を格納するバッファ領域。最大で

**HECMW\_FILENAME\_LEN+1**の大きさが必要である。 NULLを指定すると動的にメモリを確保しそれを格納先に使用する。

*bufsize* *buf*のサイズ。 *buf*がNULLの場合は何でもよい。

**戻り値:**

成功すれば取得できたリスタートファイル名へのポインタを返す。失敗すればNULLを返し、HECMW\_set\_error()によってエラー情報がセットされる。

**char\* HECMW\_ctrl\_get\_result\_file (char \* *name\_ID*, char \* *buf*, int *bufsize*)**

結果ファイル名を返す

全体制御データから、引数で示されるNAMEパラメータを持つ!RESULTのファイル名を取得して返す。ファイル名には、ランク番号(.rank)が自動的に付加される。

**引数:**

*name\_ID* 取得したい!RESULTのNAMEパラメータ

*buf* 取得したファイル名を格納するバッファ領域。最大で

**HECMW\_FILENAME\_LEN+1**の大きさが必要である。NULLを指定すると動的にメモリを確保しそれを格納先に使用する。

*bufsize* *buf*のサイズ。 *buf*がNULLの場合は何でもよい。

**戻り値:**

成功すれば取得できた結果ファイル名へのポインタを返す。失敗すればNULLを返し、HECMW\_set\_error()によってエラー情報がセットされる。

**char\* HECMW\_ctrl\_get\_result\_fileheader (char \* *name\_ID*, char \* *buf*, int *bufsize*)**

結果ファイル名を返す

全体制御データから、引数で示されるNAMEパラメータを持つ!RESULTの情報を取得して返す。ファイル名にランク番号は付加されない。

**引数:**

*name\_ID* 取得したい!RESULTのNAMEパラメータ



*buf* 取得したファイル名を格納するバッファ領域。 最大で **HECMW\_FILENAME\_LEN+1**の大きさが必要である。 NULLを指定すると動的にメモリを確保しそれを格納先に使用する。  
*bufsize* *buf*のサイズ。 *buf*がNULLの場合は何でもよい。

**戻り値:**

成功すれば取得できた結果ファイル名へのポインタを返す。 失敗すればNULLを返し、**HECMW\_set\_error()**によってエラー情報がセットされる。

**char\* HECMW\_ctrl\_get\_result\_file\_by\_io (int *io*, char \* *buf*, int *bufsize*)**

結果ファイル名を返す

全体制御データから、引数で示されるIOパラメータを持つ!RESULTのうち、 最初に見つかったもののファイル名を返す。 ファイル名には、ランク番号(.rank)が自動的に付加される。

**引数:**

*io* 取得したい!RESULTのIOパラメータ。 対象とするIOパラメータが複数ある場合は、その論理和を指定すればよい。

*buf* 取得したファイル名を格納するバッファ領域。 最大で **HECMW\_FILENAME\_LEN+1**の大きさが必要である。 NULLを指定すると動的にメモリを確保しそれを格納先に使用する。  
*bufsize* *buf*のサイズ。 *buf*がNULLの場合は何でもよい。

**戻り値:**

成功すれば取得できた結果ファイル名へのポインタを返す。 失敗すればNULLを返し、**HECMW\_set\_error()**によってエラー情報がセットされる。

**char\* HECMW\_ctrl\_get\_result\_fileheader\_by\_io (int *io*, char \* *buf*, int *bufsize*)**

結果ファイル名を返す

全体制御データから、引数で示されるIOパラメータを持つ!RESULTのうち、最初に見つかったもののファイル名を返す。ファイル名にランク番号は付加されない。

#### 引数:

*io* 取得したい!RESULTのIOパラメータ。対象とするIOパラメータが複数ある場合は、その論理和を指定すればよい。

*buf* 取得したファイル名を格納するバッファ領域。最大で

**HECMW\_FILENAME\_LEN+1**の大きさが必要である。NULLを指定すると動的にメモリを確保しそれを格納先に使用する。

*bufsize* *buf*のサイズ。 *buf*がNULLの場合は何でもよい。

#### 戻り値:

成功すれば取得できた結果ファイル名へのポインタを返す。失敗すればNULLを返し、**HECMW\_set\_error()**によってエラー情報がセットされる。

### **char\* HECMW\_ctrl\_get\_control\_file (char \* *name\_ID*, char \* *buf*, int *bufsize*)**

制御ファイル名を返す

全体制御データから、引数で示されるNAMEパラメータを持つ!CONTROLのファイル名を取得して返す。ファイル名には、ランク番号(.rank)が自動的に付加される。

#### 引数:

*name\_ID* 取得したい!CONTROLのNAMEパラメータ

*buf* 取得したファイル名を格納するバッファ領域。最大で

**HECMW\_FILENAME\_LEN+1**の大きさが必要である。NULLを指定すると動的にメモリを確保しそれを格納先に使用する。

*bufsize* *buf*のサイズ。 *buf*がNULLの場合は何でもよい。

#### 戻り値:

成功すれば取得できた制御ファイル名へのポインタを返す。失敗すればNULLを返し、**HECMW\_set\_error()**によってエラー情報がセットされる。



## hecmw\_ctrllex.h

全体制御データの字句解析ルーチン

```
#include <stdio.h>
```

### 列挙型

- enum { **HECMW\_CTRLLEX\_NL** = 1000, **HECMW\_CTRLLEX\_INT**,  
**HECMW\_CTRLLEX\_DOUBLE**, **HECMW\_CTRLLEX\_NAME**,  
**HECMW\_CTRLLEX\_FILENAME**, **HECMW\_CTRLLEX\_H\_CONTROL** = 2000,  
**HECMW\_CTRLLEX\_H\_MESH**, **HECMW\_CTRLLEX\_H\_MESH\_GROUP**,  
**HECMW\_CTRLLEX\_H\_RESULT**, **HECMW\_CTRLLEX\_H\_RESTART**,  
**HECMW\_CTRLLEX\_H\_COUPLEMESH**, **HECMW\_CTRLLEX\_H\_COUPLE**,  
**HECMW\_CTRLLEX\_H\_PROG1**, **HECMW\_CTRLLEX\_H\_PROG2**,  
**HECMW\_CTRLLEX\_K\_ABAQUS** = 3000, **HECMW\_CTRLLEX\_K\_DIR**,  
**HECMW\_CTRLLEX\_K\_FEMAP**, **HECMW\_CTRLLEX\_K\_GEOFEM**,  
**HECMW\_CTRLLEX\_K\_HECMW\_DIST**, **HECMW\_CTRLLEX\_K\_HECMW\_ENTIRE**,  
**HECMW\_CTRLLEX\_K\_IN**, **HECMW\_CTRLLEX\_K\_INOUT**, **HECMW\_CTRLLEX\_K\_IO**,  
**HECMW\_CTRLLEX\_K\_NAME**, **HECMW\_CTRLLEX\_K\_NASTRAN**,  
**HECMW\_CTRLLEX\_K\_OUT**, **HECMW\_CTRLLEX\_K\_TYPE**,  
**HECMW\_CTRLLEX\_K\_NPROC**, **HECMW\_CTRLLEX\_K\_MXN**,  
**HECMW\_CTRLLEX\_K\_MAXMN** }

トークン番号定義

### 関数

- double **HECMW\_ctrllex\_get\_number** (void)  
*直前に読み込んだトークンが数値であった場合、その値を返す*
- char \* **HECMW\_ctrllex\_get\_text** (void)  
*直前に読み込んだトークンの文字列表記を返す*

- **int HECMW\_ctrllex\_get\_lineno** (void)  
読み込んでいるファイルの現在の行番号を返す
  - **int HECMW\_ctrllex\_next\_token** (void)  
次のトークンを返す
  - **int HECMW\_ctrllex\_next\_token\_skip** (int skip\_token)  
次のトークンを返す
  - **int HECMW\_ctrllex\_set\_input** (FILE \*fp)  
字句解析ルーチンで読み込むファイルのファイルポインタをセットする
  - **int HECMW\_ctrllex\_skip\_line** (void)  
現在読み込み中の行を読み飛ばし、その行の最後のトークン番号を返す
  - **int HECMW\_ctrllex\_unput\_token** (void)  
直前に読み込んだトークンを押し戻す
- 

## 説明

全体制御データの字句解析ルーチン

日付:

2004年2月16日

作者:

坂根 一彰

---

## 列挙型

## anonymous enum

トークン番号定義

列挙型の値:

*HECMW\_CTRLLEX\_NL* 改行文字  
*HECMW\_CTRLLEX\_INT* 整数  
*HECMW\_CTRLLEX\_DOUBLE* 浮動小数点  
*HECMW\_CTRLLEX\_NAME* 名前  
*HECMW\_CTRLLEX\_FILENAME* ファイル名  
*HECMW\_CTRLLEX\_H\_CONTROL* !CONTROL  
*HECMW\_CTRLLEX\_H\_MESH* !MESH  
*HECMW\_CTRLLEX\_H\_MESH\_GROUP* !MESH GROUP  
*HECMW\_CTRLLEX\_H\_RESULT* !RESULT  
*HECMW\_CTRLLEX\_H\_RESTART* !RESTART  
*HECMW\_CTRLLEX\_H\_COUPLEMESH* !COUPLEMESH  
*HECMW\_CTRLLEX\_H\_COUPLE* !COUPLE  
*HECMW\_CTRLLEX\_H\_PROG1* !PROG1  
*HECMW\_CTRLLEX\_H\_PROG2* !PROG2  
*HECMW\_CTRLLEX\_K\_ABAQUS* ABAQUS.  
*HECMW\_CTRLLEX\_K\_DIR* DIR.  
*HECMW\_CTRLLEX\_K\_FEMAP* FEMAP.  
*HECMW\_CTRLLEX\_K\_GEOFEM* GeoFEM.  
*HECMW\_CTRLLEX\_K\_HECMW\_DIST* HECMW-DIST.  
*HECMW\_CTRLLEX\_K\_HECMW\_ENTIRE* HECMW-ENTIRE.  
*HECMW\_CTRLLEX\_K\_IN* IN.  
*HECMW\_CTRLLEX\_K\_INOUT* INOUT.  
*HECMW\_CTRLLEX\_K\_IO* IO.  
*HECMW\_CTRLLEX\_K\_NAME* NAME.  
*HECMW\_CTRLLEX\_K\_NASTRAN* NASTRAN.  
*HECMW\_CTRLLEX\_K\_OUT* OUT.  
*HECMW\_CTRLLEX\_K\_TYPE* TYPE.  
*HECMW\_CTRLLEX\_K\_NPROC* NPROC.  
*HECMW\_CTRLLEX\_K\_MXN* MXN.

**HECMW\_CTRLLEX\_K\_MAXMN** MAXMN.

---

## 関数

### **double HECMW\_ctrllex\_get\_number (void)**

直前に読み込んだトークンが数値であった場合、その値を返す

戻り値:

直前に読み込まれた数値

### **char\* HECMW\_ctrllex\_get\_text (void)**

直前に読み込んだトークンの文字列表記を返す

戻り値:

直前に読み込まれたトークンの文字列表記

### **int HECMW\_ctrllex\_get\_lineno (void)**

読み込んでいるファイルの現在の行番号を返す

戻り値:

行番号

### **int HECMW\_ctrllex\_next\_token (void)**

次のトークンを返す

EOFに達した場合は0を返す

**戻り値:**

次のトークン番号

### **int HECMW\_ctrllex\_next\_token\_skip (int *skip\_token*)**

次のトークンを返す

*skip\_token*で指定されたトークンの連続は読み飛ばされる。それ以外のトークンが現れたらそれを返す。 EOFに達した場合は0を返す

**戻り値:**

次のトークン番号

### **int HECMW\_ctrllex\_set\_input (FILE \* *fp*)**

字句解析ルーチンで読み込むファイルのファイルポインタをセットする

**引数:**

*fp* 字句解析対象のファイルへのファイルポインタ

**戻り値:**

成功すれば0を返す。 引数が無効なら-1を返す。

### **int HECMW\_ctrllex\_skip\_line (void)**

現在読み込み中の行を読み飛ばし、その行の最後のトークン番号を返す



**戻り値:**

現在の行の最後のトークン番号. EOFに達した場合は0を返す.

**int HECMW\_ctrllex\_unput\_token (void)**

直前に読み込んだトークンを押し戻す

次回取得したトークンは, 押し戻したトークンとなる.

**戻り値:**

常に0を返す.

## hecmw\_debug\_write\_dist.h

分散メッシュデータのDEBUG出力

```
#include "hecmw_struct.h"
```

### マクロ定義

- #define **HECMW\_dbg\_n\_node**(mesh)
- #define **HECMW\_dbg\_nn\_internal**(mesh)
- #define **HECMW\_dbg\_n\_dof**(mesh)
- #define **HECMW\_dbg\_n\_dof\_grp**(mesh)
- #define **HECMW\_dbg\_node**(mesh)
- #define **HECMW\_dbg\_node\_id**(mesh)
- #define **HECMW\_dbg\_node\_id\_lid**(mesh)
- #define **HECMW\_dbg\_node\_id\_domain**(mesh)
- #define **HECMW\_dbg\_global\_node\_id**(mesh)
- #define **HECMW\_dbg\_node\_dof\_item**(mesh)
- #define **HECMW\_dbg\_node\_dof\_index**(mesh)
- #define **HECMW\_dbg\_node\_init\_val\_item**(mesh)
- #define **HECMW\_dbg\_node\_init\_val\_index**(mesh)
- #define **HECMW\_dbg\_n\_elem**(mesh)
- #define **HECMW\_dbg\_ne\_internal**(mesh)
- #define **HECMW\_dbg\_n\_elem\_type**(mesh)
- #define **HECMW\_dbg\_elem\_type\_item**(mesh)
- #define **HECMW\_dbg\_elem\_type\_index**(mesh)
- #define **HECMW\_dbg\_elem\_type**(mesh)
- #define **HECMW\_dbg\_elem\_node\_item**(mesh)
- #define **HECMW\_dbg\_elem\_node\_index**(mesh)
- #define **HECMW\_dbg\_elem\_id**(mesh)
- #define **HECMW\_dbg\_elem\_id\_lid**(mesh)
- #define **HECMW\_dbg\_elem\_id\_domain**(mesh)
- #define **HECMW\_dbg\_global\_elem\_id**(mesh)
- #define **HECMW\_dbg\_section\_id**(mesh)

- #define **HECMW\_dbg\_n\_elem\_mat\_id**(mesh)
- #define **HECMW\_dbg\_elem\_mat\_id\_item**(mesh)
- #define **HECMW\_dbg\_elem\_mat\_id\_index**(mesh)
- #define **HECMW\_dbg\_elem\_internal\_list**(mesh)
- #define **HECMW\_dbg\_n\_neighbor\_pe**(mesh)
- #define **HECMW\_dbg\_neighbor\_pe**(mesh)
- #define **HECMW\_dbg\_import\_item**(mesh)
- #define **HECMW\_dbg\_import\_index**(mesh)
- #define **HECMW\_dbg\_export\_item**(mesh)
- #define **HECMW\_dbg\_export\_index**(mesh)
- #define **HECMW\_dbg\_shared\_item**(mesh)
- #define **HECMW\_dbg\_shared\_index**(mesh)
- #define **HECMW\_dbg\_n\_sect**(mesh)
- #define **HECMW\_dbg\_section**(mesh)
- #define **HECMW\_dbg\_n\_mat**(mesh)
- #define **HECMW\_dbg\_material**(mesh)
- #define **HECMW\_dbg\_n\_mpc**(mesh)
- #define **HECMW\_dbg\_mpc**(mesh)
- #define **HECMW\_dbg\_n\_amp**(mesh)
- #define **HECMW\_dbg\_amp**(mesh)
- #define **HECMW\_dbg\_n\_node\_group**(mesh)
- #define **HECMW\_dbg\_node\_group**(mesh)
- #define **HECMW\_dbg\_n\_elem\_group**(mesh)
- #define **HECMW\_dbg\_elem\_group**(mesh)
- #define **HECMW\_dbg\_n\_surf\_group**(mesh)
- #define **HECMW\_dbg\_surf\_group**(mesh)

## 関数

- void **HECMW\_dbg\_n\_node\_** (struct **hecmwST\_local\_mesh** \*local\_mesh, char \*file, int line)
- void **HECMW\_dbg\_nn\_internal\_** (struct **hecmwST\_local\_mesh** \*local\_mesh, char \*file, int line)
- void **HECMW\_dbg\_n\_dof\_** (struct **hecmwST\_local\_mesh** \*local\_mesh, char \*file, int line)
- void **HECMW\_dbg\_n\_dof\_grp\_** (struct **hecmwST\_local\_mesh** \*local\_mesh, char \*file, int line)
- void **HECMW\_dbg\_node\_** (struct **hecmwST\_local\_mesh** \*local\_mesh, char \*file, int line)
- void **HECMW\_dbg\_node\_id\_** (struct **hecmwST\_local\_mesh** \*local\_mesh, char \*file, int line)
- void **HECMW\_dbg\_node\_id\_lid\_** (struct **hecmwST\_local\_mesh** \*local\_mesh, char \*file, int line)

- void **HECMW\_dbg\_node\_id\_domain\_** (struct **hecmwST\_local\_mesh** \*local\_mesh, char \*file, int line)
- void **HECMW\_dbg\_global\_node\_id\_** (struct **hecmwST\_local\_mesh** \*local\_mesh, char \*file, int line)
- void **HECMW\_dbg\_node\_dof\_item\_** (struct **hecmwST\_local\_mesh** \*local\_mesh, char \*file, int line)
- void **HECMW\_dbg\_node\_dof\_index\_** (struct **hecmwST\_local\_mesh** \*local\_mesh, char \*file, int line)
- void **HECMW\_dbg\_node\_init\_val\_item\_** (struct **hecmwST\_local\_mesh** \*local\_mesh, char \*file, int line)
- void **HECMW\_dbg\_node\_init\_val\_index\_** (struct **hecmwST\_local\_mesh** \*local\_mesh, char \*file, int line)
- void **HECMW\_dbg\_n\_elem\_** (struct **hecmwST\_local\_mesh** \*local\_mesh, char \*file, int line)
- void **HECMW\_dbg\_ne\_internal\_** (struct **hecmwST\_local\_mesh** \*local\_mesh, char \*file, int line)
- void **HECMW\_dbg\_n\_elem\_type\_** (struct **hecmwST\_local\_mesh** \*local\_mesh, char \*file, int line)
- void **HECMW\_dbg\_elem\_type\_item\_** (struct **hecmwST\_local\_mesh** \*local\_mesh, char \*file, int line)
- void **HECMW\_dbg\_elem\_type\_index\_** (struct **hecmwST\_local\_mesh** \*local\_mesh, char \*file, int line)
- void **HECMW\_dbg\_elem\_type\_** (struct **hecmwST\_local\_mesh** \*local\_mesh, char \*file, int line)
- void **HECMW\_dbg\_elem\_node\_item\_** (struct **hecmwST\_local\_mesh** \*local\_mesh, char \*file, int line)
- void **HECMW\_dbg\_elem\_node\_index\_** (struct **hecmwST\_local\_mesh** \*local\_mesh, char \*file, int line)
- void **HECMW\_dbg\_elem\_id\_** (struct **hecmwST\_local\_mesh** \*local\_mesh, char \*file, int line)
- void **HECMW\_dbg\_elem\_id\_lid\_** (struct **hecmwST\_local\_mesh** \*local\_mesh, char \*file, int line)
- void **HECMW\_dbg\_elem\_id\_domain\_** (struct **hecmwST\_local\_mesh** \*local\_mesh, char \*file, int line)
- void **HECMW\_dbg\_global\_elem\_id\_** (struct **hecmwST\_local\_mesh** \*local\_mesh, char \*file, int line)
- void **HECMW\_dbg\_elem\_internal\_list\_** (struct **hecmwST\_local\_mesh** \*local\_mesh, char \*file, int line)
- void **HECMW\_dbg\_section\_id\_** (struct **hecmwST\_local\_mesh** \*local\_mesh, char \*file, int line)
- void **HECMW\_dbg\_n\_elem\_mat\_id\_** (struct **hecmwST\_local\_mesh** \*local\_mesh, char \*file, int line)

- void **HECMW\_dbg\_elem\_mat\_id\_item\_** (struct **hecmwST\_local\_mesh** \*local\_mesh, char \*file, int line)
- void **HECMW\_dbg\_elem\_mat\_id\_index\_** (struct **hecmwST\_local\_mesh** \*local\_mesh, char \*file, int line)
- void **HECMW\_dbg\_n\_neighbor\_pe\_** (struct **hecmwST\_local\_mesh** \*local\_mesh, char \*file, int line)
- void **HECMW\_dbg\_neighbor\_pe\_** (struct **hecmwST\_local\_mesh** \*local\_mesh, char \*file, int line)
- void **HECMW\_dbg\_import\_item\_** (struct **hecmwST\_local\_mesh** \*local\_mesh, char \*file, int line)
- void **HECMW\_dbg\_import\_index\_** (struct **hecmwST\_local\_mesh** \*local\_mesh, char \*file, int line)
- void **HECMW\_dbg\_export\_item\_** (struct **hecmwST\_local\_mesh** \*local\_mesh, char \*file, int line)
- void **HECMW\_dbg\_export\_index\_** (struct **hecmwST\_local\_mesh** \*local\_mesh, char \*file, int line)
- void **HECMW\_dbg\_shared\_item\_** (struct **hecmwST\_local\_mesh** \*local\_mesh, char \*file, int line)
- void **HECMW\_dbg\_shared\_index\_** (struct **hecmwST\_local\_mesh** \*local\_mesh, char \*file, int line)
- void **HECMW\_dbg\_n\_sect\_** (struct **hecmwST\_local\_mesh** \*local\_mesh, char \*file, int line)
- void **HECMW\_dbg\_section\_** (struct **hecmwST\_local\_mesh** \*local\_mesh, char \*file, int line)
- void **HECMW\_dbg\_n\_mat\_** (struct **hecmwST\_local\_mesh** \*local\_mesh, char \*file, int line)
- void **HECMW\_dbg\_material\_** (struct **hecmwST\_local\_mesh** \*local\_mesh, char \*file, int line)
- void **HECMW\_dbg\_n\_mpc\_** (struct **hecmwST\_local\_mesh** \*local\_mesh, char \*file, int line)
- void **HECMW\_dbg\_mpc\_** (struct **hecmwST\_local\_mesh** \*local\_mesh, char \*file, int line)
- void **HECMW\_dbg\_n\_amp\_** (struct **hecmwST\_local\_mesh** \*local\_mesh, char \*file, int line)
- void **HECMW\_dbg\_amp\_** (struct **hecmwST\_local\_mesh** \*local\_mesh, char \*file, int line)
- void **HECMW\_dbg\_n\_node\_group\_** (struct **hecmwST\_local\_mesh** \*local\_mesh, char \*file, int line)
- void **HECMW\_dbg\_node\_group\_** (struct **hecmwST\_local\_mesh** \*local\_mesh, char \*file, int line)
- void **HECMW\_dbg\_n\_elem\_group\_** (struct **hecmwST\_local\_mesh** \*local\_mesh, char \*file, int line)
- void **HECMW\_dbg\_elem\_group\_** (struct **hecmwST\_local\_mesh** \*local\_mesh, char \*file, int line)
- void **HECMW\_dbg\_n\_surf\_group\_** (struct **hecmwST\_local\_mesh** \*local\_mesh, char \*file, int line)
- void **HECMW\_dbg\_surf\_group\_** (struct **hecmwST\_local\_mesh** \*local\_mesh, char \*file, int line)

---

## 説明

分散メッシュデータの DEBUG 出力

## マクロ定義

```
#define HECMW_dbg_n_node(mesh)
```

```
#define HECMW_dbg_nn_internal(mesh)
```

```
#define HECMW_dbg_n_dof(mesh)
```

```
#define HECMW_dbg_n_dof_grp(mesh)
```

```
#define HECMW_dbg_node(mesh)
```

```
#define HECMW_dbg_node_id(mesh)
```

```
#define HECMW_dbg_node_id_lid(mesh)
```

```
#define HECMW_dbg_node_id_domain(mesh)
```

```
#define HECMW_dbg_global_node_id(mesh)
```

```
#define HECMW_dbg_node_dof_item(mesh)
```

**#define HECMW\_dbg\_node\_dof\_index(mesh)**

**#define HECMW\_dbg\_node\_init\_val\_item(mesh)**

**#define HECMW\_dbg\_node\_init\_val\_index(mesh)**

**#define HECMW\_dbg\_n\_elem(mesh)**

**#define HECMW\_dbg\_ne\_internal(mesh)**

**#define HECMW\_dbg\_n\_elem\_type(mesh)**

**#define HECMW\_dbg\_elem\_type\_item(mesh)**

**#define HECMW\_dbg\_elem\_type\_index(mesh)**

**#define HECMW\_dbg\_elem\_type(mesh)**

**#define HECMW\_dbg\_elem\_node\_item(mesh)**

**#define HECMW\_dbg\_elem\_node\_index(mesh)**

**#define HECMW\_dbg\_elem\_id(mesh)**

**#define HECMW\_dbg\_elem\_id\_lid(mesh)**

**#define HECMW\_dbg\_elem\_id\_domain(mesh)**

**#define HECMW\_dbg\_global\_elem\_id(mesh)**

**#define HECMW\_dbg\_section\_id(mesh)**

**#define HECMW\_dbg\_n\_elem\_mat\_id(mesh)**

**#define HECMW\_dbg\_elem\_mat\_id\_item(mesh)**

**#define HECMW\_dbg\_elem\_mat\_id\_index(mesh)**

**#define HECMW\_dbg\_elem\_internal\_list(mesh)**

**#define HECMW\_dbg\_n\_neighbor\_pe(mesh)**

**#define HECMW\_dbg\_neighbor\_pe(mesh)**

**#define HECMW\_dbg\_import\_item(mesh)**



**#define HECMW\_dbg\_import\_index(mesh)**

**#define HECMW\_dbg\_export\_item(mesh)**

**#define HECMW\_dbg\_export\_index(mesh)**

**#define HECMW\_dbg\_shared\_item(mesh)**

**#define HECMW\_dbg\_shared\_index(mesh)**

**#define HECMW\_dbg\_n\_sect(mesh)**

**#define HECMW\_dbg\_section(mesh)**

**#define HECMW\_dbg\_n\_mat(mesh)**

**#define HECMW\_dbg\_material(mesh)**

**#define HECMW\_dbg\_n\_mpc(mesh)**

**#define HECMW\_dbg\_mpc(mesh)**

**#define HECMW\_dbg\_n\_amp(mesh)**

```
#define HECMW_dbg_amp(mesh)
```

```
#define HECMW_dbg_n_node_group(mesh)
```

```
#define HECMW_dbg_node_group(mesh)
```

```
#define HECMW_dbg_n_elem_group(mesh)
```

```
#define HECMW_dbg_elem_group(mesh)
```

```
#define HECMW_dbg_n_surf_group(mesh)
```

```
#define HECMW_dbg_surf_group(mesh)
```

---

## 関数

```
void HECMW_dbg_n_node_ (struct hecmwST_local_mesh * local_mesh, char *  
file, int line)
```

```
void HECMW_dbg_nn_internal_ (struct hecmwST_local_mesh * local_mesh, char  
* file, int line)
```

**void HECMW\_dbg\_n\_dof\_ (struct hecmwST\_local\_mesh \* *local\_mesh*, char \* *file*,  
int *line*)**

**void HECMW\_dbg\_n\_dof\_grp\_ (struct hecmwST\_local\_mesh \* *local\_mesh*, char \*  
*file*, int *line*)**

**void HECMW\_dbg\_node\_ (struct hecmwST\_local\_mesh \* *local\_mesh*, char \* *file*,  
int *line*)**

**void HECMW\_dbg\_node\_id\_ (struct hecmwST\_local\_mesh \* *local\_mesh*, char \*  
*file*, int *line*)**

**void HECMW\_dbg\_node\_id\_lid\_ (struct hecmwST\_local\_mesh \* *local\_mesh*, char  
\* *file*, int *line*)**

**void HECMW\_dbg\_node\_id\_domain\_ (struct hecmwST\_local\_mesh \* *local\_mesh*,  
char \* *file*, int *line*)**

**void HECMW\_dbg\_global\_node\_id\_ (struct hecmwST\_local\_mesh \* *local\_mesh*,  
char \* *file*, int *line*)**

**void HECMW\_dbg\_node\_dof\_item\_ (struct hecmwST\_local\_mesh \* *local\_mesh*,  
char \* *file*, int *line*)**

**void HECMW\_dbg\_node\_dof\_index\_ (struct hecmwST\_local\_mesh \* *local\_mesh*,  
char \* *file*, int *line*)**

**void HECMW\_dbg\_node\_init\_val\_item\_ (struct hecmwST\_local\_mesh \*  
*local\_mesh*, char \* *file*, int *line*)**

**void HECMW\_dbg\_node\_init\_val\_index\_ (struct hecmwST\_local\_mesh \*  
*local\_mesh*, char \* *file*, int *line*)**

**void HECMW\_dbg\_n\_elem\_ (struct hecmwST\_local\_mesh \* *local\_mesh*, char \*  
*file*, int *line*)**

**void HECMW\_dbg\_ne\_internal\_ (struct hecmwST\_local\_mesh \* *local\_mesh*, char  
\* *file*, int *line*)**

**void HECMW\_dbg\_n\_elem\_type\_ (struct hecmwST\_local\_mesh \* *local\_mesh*,  
char \* *file*, int *line*)**

**void HECMW\_dbg\_elem\_type\_item\_ (struct hecmwST\_local\_mesh \* *local\_mesh*,  
char \* *file*, int *line*)**

**void HECMW\_dbg\_elem\_type\_index\_ (struct hecmwST\_local\_mesh \* *local\_mesh*,  
char \* *file*, int *line*)**

**void HECMW\_dbg\_elem\_type\_ (struct hecmwST\_local\_mesh \* *local\_mesh*, char \*  
*file*, int *line*)**

**void HECMW\_dbg\_elem\_node\_item\_ (struct hecmwST\_local\_mesh \* *local\_mesh*,  
char \* *file*, int *line*)**

**void HECMW\_dbg\_elem\_node\_index\_ (struct hecmwST\_local\_mesh \*  
*local\_mesh*, char \* *file*, int *line*)**

**void HECMW\_dbg\_elem\_id\_ (struct hecmwST\_local\_mesh \* *local\_mesh*, char \*  
*file*, int *line*)**

**void HECMW\_dbg\_elem\_id\_lid\_ (struct hecmwST\_local\_mesh \* *local\_mesh*, char  
\* *file*, int *line*)**

**void HECMW\_dbg\_elem\_id\_domain\_ (struct hecmwST\_local\_mesh \* *local\_mesh*,  
char \* *file*, int *line*)**

**void HECMW\_dbg\_global\_elem\_id\_ (struct hecmwST\_local\_mesh \* *local\_mesh*,  
char \* *file*, int *line*)**

**void HECMW\_dbg\_elem\_internal\_list\_ (struct hecmwST\_local\_mesh \*  
*local\_mesh*, char \* *file*, int *line*)**

**void HECMW\_dbg\_section\_id\_ (struct hecmwST\_local\_mesh \* *local\_mesh*, char \*  
*file*, int *line*)**

**void HECMW\_dbg\_n\_elem\_mat\_id\_ (struct hecmwST\_local\_mesh \* *local\_mesh*,  
char \* *file*, int *line*)**

**void HECMW\_dbg\_elem\_mat\_id\_item\_ (struct hecmwST\_local\_mesh \*  
*local\_mesh*, char \* *file*, int *line*)**

**void HECMW\_dbg\_elem\_mat\_id\_index\_ (struct hecmwST\_local\_mesh \*  
*local\_mesh*, char \* *file*, int *line*)**

**void HECMW\_dbg\_n\_neighbor\_pe\_ (struct hecmwST\_local\_mesh \* *local\_mesh*,  
char \* *file*, int *line*)**

**void HECMW\_dbg\_neighbor\_pe\_ (struct hecmwST\_local\_mesh \* *local\_mesh*,  
char \* *file*, int *line*)**

**void HECMW\_dbg\_import\_item\_ (struct hecmwST\_local\_mesh \* *local\_mesh*,  
char \* *file*, int *line*)**

**void HECMW\_dbg\_import\_index\_ (struct hecmwST\_local\_mesh \* *local\_mesh*,  
char \* *file*, int *line*)**

**void HECMW\_dbg\_export\_item\_ (struct hecmwST\_local\_mesh \* *local\_mesh*, char  
\* *file*, int *line*)**

**void HECMW\_dbg\_export\_index\_ (struct hecmwST\_local\_mesh \* *local\_mesh*,  
char \* *file*, int *line*)**

**void HECMW\_dbg\_shared\_item\_ (struct hecmwST\_local\_mesh \* *local\_mesh*,  
char \* *file*, int *line*)**

**void HECMW\_dbg\_shared\_index\_ (struct hecmwST\_local\_mesh \* *local\_mesh*,  
char \* *file*, int *line*)**

**void HECMW\_dbg\_n\_sect\_ (struct hecmwST\_local\_mesh \* *local\_mesh*, char \* *file*,  
int *line*)**

**void HECMW\_dbg\_section\_ (struct hecmwST\_local\_mesh \* *local\_mesh*, char \*  
*file*, int *line*)**

**void HECMW\_dbg\_n\_mat\_ (struct hecmwST\_local\_mesh \* *local\_mesh*, char \* *file*,  
int *line*)**

**void HECMW\_dbg\_material\_ (struct hecmwST\_local\_mesh \* *local\_mesh*, char \*  
*file*, int *line*)**

**void HECMW\_dbg\_n\_mpc\_ (struct hecmwST\_local\_mesh \* *local\_mesh*, char \* *file*,  
int *line*)**

**void HECMW\_dbg\_mpc\_ (struct hecmwST\_local\_mesh \* *local\_mesh*, char \* *file*,  
int *line*)**

**void HECMW\_dbg\_n\_amp\_ (struct hecmwST\_local\_mesh \* *local\_mesh*, char \* *file*,  
int *line*)**

**void HECMW\_dbg\_amp\_ (struct hecmwST\_local\_mesh \* *local\_mesh*, char \* *file*,  
int *line*)**

**void HECMW\_dbg\_n\_node\_group\_ (struct hecmwST\_local\_mesh \* *local\_mesh*,  
char \* *file*, int *line*)**

**void HECMW\_dbg\_node\_group\_ (struct hecmwST\_local\_mesh \* *local\_mesh*,  
char \* *file*, int *line*)**

**void HECMW\_dbg\_n\_elem\_group\_ (struct hecmwST\_local\_mesh \* *local\_mesh*,  
char \* *file*, int *line*)**

**void HECMW\_dbg\_elem\_group\_ (struct hecmwST\_local\_mesh \* *local\_mesh*, char  
\* *file*, int *line*)**

**void HECMW\_dbg\_n\_surf\_group\_ (struct hecmwST\_local\_mesh \* *local\_mesh*,  
char \* *file*, int *line*)**

**void HECMW\_dbg\_surf\_group\_ (struct hecmwST\_local\_mesh \* *local\_mesh*, char  
\* *file*, int *line*)**



## hecmw\_dist.h

メッシュデータ構造体に関する処理

```
#include "hecmw_struct.h"
```

### 関数

- `int HECMW_dist_get_mat_id (const struct hecmwST_material *mat, const char *name)`  
材料情報構造体に含まれる材料のうち、材料名が`name`である材料のIDを返す.
  - `int HECMW_dist_get_egrp_id (const struct hecmwST_elem_grp *egrp, const char *name)`  
要素グループ情報構造体に含まれる材料のうち、要素グループ名が`name`である要素グループのIDを返す.
  - `int HECMW_dist_gid2lid_node (const struct hecmwST_local_mesh *mesh, int gid)`  
グローバル節点番号をローカル節点番号に変換する
  - `int HECMW_dist_gid2lid_elem (const struct hecmwST_local_mesh *mesh, int gid)`  
グローバル要素番号をローカル要素番号に変換する
- 

### 説明

メッシュデータ構造体に関する処理

日付:

2004年2月16日

作者:

坂根 一彰

---

## 関数

**int HECMW\_dist\_get\_mat\_id (const struct hecmwST\_material \* *mat*, const char \* *name*)**

材料情報構造体に含まれる材料のうち、材料名が*name*である材料のIDを返す。

材料IDは、1から始まる通し番号とする。

### 引数:

*mat* 材料情報構造体

*name* 材料名

### 戻り値:

成功すれば、材料IDを返す。 引数が無効、あるいは適切な材料が見付からなければ-1を返す。

**int HECMW\_dist\_get\_egrp\_id (const struct hecmwST\_elem\_grp \* *egrp*, const char \* *name*)**

要素グループ情報構造体に含まれる材料のうち、要素グループ名が*name*である要素グループのIDを返す。

要素グループIDは、1から始まる通し番号とする。

### 引数:

*egrp* 要素グループ情報構造体

*name* 要素グループ名

### 戻り値:

成功すれば、要素グループIDを返す。 引数が無効、あるいは適切な要素グループが見付からなければ-1を返す。

**int HECMW\_dist\_gid2lid\_node (const struct hecmwST\_local\_mesh \* *mesh*, int *gid*)**

グローバル節点番号をローカル節点番号に変換する

**引数:**

*mesh* メッシュデータ構造体

*gid* グローバル節点番号

**戻り値:**

成功すれば、ローカル節点番号を返す。 引数が無効、あるいは適切な節点が見付からなければ-1を返す。

**int HECMW\_dist\_gid2lid\_elem (const struct hecmwST\_local\_mesh \* *mesh*, int *gid*)**

グローバル要素番号をローカル要素番号に変換する

**引数:**

*mesh* メッシュデータ構造体

*gid* グローバル要素番号

**戻り値:**

成功すれば、ローカル要素番号を返す。 引数が無効、あるいは適切な要素が見付からなければ-1を返す。

## hecmw\_dist\_copy\_f2c.h

FortranからCへメッシュデータをコピーする.

### 関数

- `int HECMW_dist_copy_f2c_init (struct hecmwST_local_mesh *local_mesh)`  
コピールーチンの初期化を行う
- `int HECMW_dist_copy_f2c_finalize (void)`  
コピールーチンの終了処理を行う

---

### 説明

Fortran から C へメッシュデータをコピーする.

日付:

2004年2月16日

作者:

坂根 一彰

---

### 関数

`int HECMW_dist_copy_f2c_init (struct hecmwST_local_mesh * local_mesh)`

コピールーチンの初期化を行う

引数:

*local\_mesh* コピー先メッシュデータ構造体. 構造体メンバは全て領域が確保されている必要がある. その他の構造体メンバはコピー時に確保される.

戻り値:

常に0を返す.

**int HECMW\_dist\_copy\_f2c\_finalize (void)**

コピールーチンの終了処理を行う

## hecmw\_dist\_free.h

メッシュデータ構造体のメモリ領域を解放する.

```
#include "hecmw_struct.h"
```

### 関数

- void **HECMW\_dist\_free\_section** (struct **hecmwST\_section** \*section)  
セクション情報のメモリ領域を解放する
- void **HECMW\_dist\_free\_material** (struct **hecmwST\_material** \*material)  
材料情報のメモリ領域を解放する
- void **HECMW\_dist\_free\_mpc** (struct **hecmwST\_mpc** \*mpc)  
拘束情報のメモリ領域を解放する
- void **HECMW\_dist\_free\_amplitude** (struct **hecmwST\_amplitude** \*amp)  
AMPLITUDE情報のメモリ領域を解放する.
- void **HECMW\_dist\_free\_ngrp** (struct **hecmwST\_node\_grp** \*grp)  
節点グループ情報のメモリ領域を解放する
- void **HECMW\_dist\_free\_egrp** (struct **hecmwST\_elem\_grp** \*grp)  
要素グループ情報のメモリ領域を解放する
- void **HECMW\_dist\_free\_sgrp** (struct **hecmwST\_surf\_grp** \*grp)  
面グループ情報のメモリ領域を解放する
- void **HECMW\_dist\_free** (struct **hecmwST\_local\_mesh** \*mesh)  
メッシュデータ構造体のメモリ領域を解放する

---

## 説明

メッシュデータ構造体のメモリ領域を解放する.

日付:

2004年2月16日

作者:

坂根 一彰

---

## 関数

**void HECMW\_dist\_free\_section (struct hecmwST\_section \* *section*)**

セクション情報のメモリ領域を解放する

引数:

*section* セクション情報

**void HECMW\_dist\_free\_material (struct hecmwST\_material \* *material*)**

材料情報のメモリ領域を解放する

引数:

*material* 材料情報

**void HECMW\_dist\_free\_mpc (struct hecmwST\_mpc \* *mpc*)**

拘束情報のメモリ領域を解放する

引数:

*mpc* 拘束情報

**void HECMW\_dist\_free\_amplitude (struct hecmwST\_amplitude \* *amp*)**

AMPLITUDE情報のメモリ領域を解放する.

引数:

*amp* AMPLITUDE情報

**void HECMW\_dist\_free\_ngrp (struct hecmwST\_node\_grp \* *grp*)**

節点グループ情報のメモリ領域を解放する

引数:

*grp* 節点グループ情報

**void HECMW\_dist\_free\_egrp (struct hecmwST\_elem\_grp \* *grp*)**

要素グループ情報のメモリ領域を解放する

引数:

*grp* 要素グループ情報

**void HECMW\_dist\_free\_sgrp (struct hecmwST\_surf\_grp \* *grp*)**



面グループ情報のメモリ領域を解放する

引数:

*grp* 面グループ情報

**void HECMW\_dist\_free (struct hecmwST\_local\_mesh \* *mesh*)**

メッシュデータ構造体のメモリ領域を解放する

引数:

*mesh* メッシュデータ構造体

## hecmw\_dist\_print.h

メッシュデータ構造体の内容出力する

```
#include <stdio.h>
#include "hecmw_struct.h"
```

### 関数

- void **HECMW\_dist\_print\_flags** (const struct **hecmwST\_local\_mesh** \*mesh, FILE \*fp)  
*フラグを出力する*
- void **HECMW\_dist\_print\_header** (const struct **hecmwST\_local\_mesh** \*mesh, FILE \*fp)  
*headerを出力する*
- void **HECMW\_dist\_print\_gridfile** (const struct **hecmwST\_local\_mesh** \*mesh, FILE \*fp)  
*gridfileを出力する*
- void **HECMW\_dist\_print\_files** (const struct **hecmwST\_local\_mesh** \*mesh, FILE \*fp)  
*filesを出力する*
- void **HECMW\_dist\_print\_zero\_temp** (const struct **hecmwST\_local\_mesh** \*mesh, FILE \*fp)  
*zero\_tempを出力する*
- void **HECMW\_dist\_print\_node** (const struct **hecmwST\_local\_mesh** \*mesh, FILE \*fp)  
*節点情報を出力する*
- void **HECMW\_dist\_print\_elem** (const struct **hecmwST\_local\_mesh** \*mesh, FILE \*fp)  
*要素情報を出力する*
- void **HECMW\_dist\_print\_pe** (const struct **hecmwST\_local\_mesh** \*mesh, FILE \*fp)

PE情報を出力する.

- void **HECMW\_dist\_print\_adapt** (const struct **hecmwST\_local\_mesh** \*mesh, FILE \*fp)  
階層情報を出力する
- void **HECMW\_dist\_print\_section** (const struct **hecmwST\_section** \*sect, FILE \*fp)  
セクション情報を出力する
- void **HECMW\_dist\_print\_material** (const struct **hecmwST\_material** \*material, FILE \*fp)  
材料情報を出力する
- void **HECMW\_dist\_print\_mpc** (const struct **hecmwST\_mpc** \*mpc, FILE \*fp)  
拘束情報を出力する
- void **HECMW\_dist\_print\_amp** (const struct **hecmwST\_amplitude** \*amp, FILE \*fp)  
AMPLITUDE情報を出力する.
- void **HECMW\_dist\_print\_ngrp** (const struct **hecmwST\_node\_grp** \*ngrp, FILE \*fp)  
節点グループ情報を出力する
- void **HECMW\_dist\_print\_egrp** (const struct **hecmwST\_elem\_grp** \*egrp, FILE \*fp)  
要素グループ情報を出力する
- void **HECMW\_dist\_print\_sgrp** (const struct **hecmwST\_surf\_grp** \*sgrp, FILE \*fp)  
面グループ情報を出力する
- void **HECMW\_dist\_print** (const struct **hecmwST\_local\_mesh** \*mesh, FILE \*fp)  
メッシュデータの全ての情報を出力する

---

## 説明

メッシュデータ構造体の内容出力する

日付:

2004年2月16日

作者:

坂根 一彰

---

## 関数

**void HECMW\_dist\_print\_flags (const struct hecmwST\_local\_mesh \* *mesh*, FILE \* *fp*)**

フラグを出力する

引数:

*mesh* メッシュデータ構造体

*fp* 出力先ファイルポインタ

**void HECMW\_dist\_print\_header (const struct hecmwST\_local\_mesh \* *mesh*, FILE \* *fp*)**

headerを出力する

引数:

*mesh* メッシュデータ構造体

*fp* 出力先ファイルポインタ

**void HECMW\_dist\_print\_gridfile (const struct hecmwST\_local\_mesh \* *mesh*, FILE \* *fp*)**

gridfileを出力する

引数:

*mesh* メッシュデータ構造体

*fp* 出力先ファイルポインタ

**void HECMW\_dist\_print\_files (const struct hecmwST\_local\_mesh \* *mesh*, FILE \* *fp*)**

filesを出力する

引数:

*mesh* メッシュデータ構造体

*fp* 出力先ファイルポインタ

**void HECMW\_dist\_print\_zero\_temp (const struct hecmwST\_local\_mesh \* *mesh*, FILE \* *fp*)**

zero\_tempを出力する

引数:

*mesh* メッシュデータ構造体

*fp* 出力先ファイルポインタ

**void HECMW\_dist\_print\_node (const struct hecmwST\_local\_mesh \* *mesh*, FILE \* *fp*)**

節点情報を出力する

引数:

*mesh* メッシュデータ構造体  
*fp* 出力先ファイルポインタ

**void HECMW\_dist\_print\_elem (const struct hecmwST\_local\_mesh \* *mesh*, FILE \* *fp*)**

要素情報を出力する

引数:

*mesh* メッシュデータ構造体  
*fp* 出力先ファイルポインタ

**void HECMW\_dist\_print\_pe (const struct hecmwST\_local\_mesh \* *mesh*, FILE \* *fp*)**

PE情報を出力する.

引数:

*mesh* メッシュデータ構造体  
*fp* 出力先ファイルポインタ

**void HECMW\_dist\_print\_adapt (const struct hecmwST\_local\_mesh \* *mesh*, FILE \* *fp*)**

階層情報を出力する

引数:

*mesh* メッシュデータ構造体  
*fp* 出力先ファイルポインタ

**void HECMW\_dist\_print\_section (const struct hecmwST\_section \* *sect*, FILE \* *fp*)**

セクション情報を出力する

引数:

*sect* セクション情報構造体

*fp* 出力先ファイルポインタ

**void HECMW\_dist\_print\_material (const struct hecmwST\_material \* *material*,  
FILE \* *fp*)**

材料情報を出力する

引数:

*material* 材料情報構造体

*fp* 出力先ファイルポインタ

**void HECMW\_dist\_print\_mpc (const struct hecmwST\_mpc \* *mpc*, FILE \* *fp*)**

拘束情報を出力する

引数:

*mpc* 拘束情報構造体

*fp* 出力先ファイルポインタ

**void HECMW\_dist\_print\_amp (const struct hecmwST\_amplitude \* *amp*, FILE \* *fp*)**

AMPLITUDE情報を出力する.

引数:

*amp* AMPLITUDE情報構造体

*fp* 出力先ファイルポインタ

**void HECMW\_dist\_print\_ngrp (const struct hecmwST\_node\_grp \* *ngrp*, FILE \* *fp*)**

節点グループ情報を出力する

引数:

*ngrp* 節点グループ構造体

*fp* 出力先ファイルポインタ

**void HECMW\_dist\_print\_egrp (const struct hecmwST\_elem\_grp \* *egrp*, FILE \* *fp*)**

要素グループ情報を出力する

引数:

*egrp* 要素グループ構造体

*fp* 出力先ファイルポインタ

**void HECMW\_dist\_print\_sgrp (const struct hecmwST\_surf\_grp \* *sgrp*, FILE \* *fp*)**

面グループ情報を出力する

引数:

*sgrp* 面グループ構造体

*fp* 出力先ファイルポインタ

**void HECMW\_dist\_print (const struct hecmwST\_local\_mesh \* *mesh*, FILE \* *fp*)**



メッシュデータの全ての情報を出力する

**引数:**

*mesh* メッシュデータ構造体

*fp* 出力先ファイルポインタ

## hecmw\_error.h

エラーが発生した場合、その情報を保存し、他の関数から取得可能とする。

```
#include <stdarg.h>
```

### 関数

- **int HECMW\_set\_verror** (int errorno, const char \*fmt, va\_list ap)  
エラー情報をセットする。
- **int HECMW\_set\_error** (int errorno, const char \*fmt,...)  
エラー情報をセットする。
- **int HECMW\_get\_error** (char \*\*errmsg)  
エラー情報を取得する。
- **int HECMW\_get\_errno** (void)  
エラー番号を取得する。
- **char \* HECMW\_get\_errmsg** (void)  
エラーメッセージを取得する。

---

### 説明

エラーが発生した場合、その情報を保存し、他の関数から取得可能とする。  
保存される情報は以下のとおりである。

- エラー番号
- エラーメッセージ

これらの情報は、エラー情報をセットする関数によってセットされ、次の呼び出しまで保存される。

日付:

2004年2月16日

作者:

坂根 一彰

---

## 関数

**int HECMW\_set\_verror (int *errorno*, const char \* *fmt*, va\_list *ap*)**

エラー情報をセットする。

ここでセットされた情報は次の呼び出しまで保存される。

引数:

*errorno* セットするエラー番号

*fmt* エラーメッセージを示す可変引数のフォーマット

*ap* エラーメッセージを示す可変引数リスト

戻り値:

エラー情報の設定に成功すれば0、失敗すれば0以外を返す。

**int HECMW\_set\_error (int *errorno*, const char \* *fmt*, ...)**

エラー情報をセットする。

ここでセットされた情報は次の呼び出しまで保存される。

引数:

*errorno* セットするエラー番号

*fmt* エラーメッセージを示す可変引数のフォーマット  
... エラーメッセージ

**戻り値:**

エラー情報の設定に成功すれば0, 失敗すれば-1を返す.

**int HECMW\_get\_error (char \*\* *errmsg*)**

エラー情報を取得する.

現在保存されているエラー番号と, それを示すエラーメッセージを取得する.

**引数:**

*errmsg* 現在保存されているエラーメッセージへのポインタへのポインタ

**戻り値:**

エラー番号

**int HECMW\_get\_errno (void)**

エラー番号を取得する.

現在保存されているエラー番号を取得する.

**戻り値:**

エラー番号

**char\* HECMW\_get\_errmsg (void)**

エラーメッセージを取得する.

現在保存されているエラーメッセージを取得する.

**戻り値:**

エラーメッセージ



## hecmw\_etype.h

要素情報を提供する

```
#include "hecmw_util.h"
```

### 関数

- int **HECMW\_get\_etype\_UTIL2HECMW** (int etype)
- int **HECMW\_get\_etype\_HECMW2UTIL** (int etype)
- int **HECMW\_get\_etype\_GeoFEM2HECMW** (int etype)
- int **HECMW\_get\_max\_node** (int etype)
- int **HECMW\_get\_max\_edge** (int etype)
- int **HECMW\_get\_max\_surf** (int etype)
- int **HECMW\_get\_max\_tsuf** (int etype)
- int **HECMW\_get\_max\_qsuf** (int etype)
- char \* **HECMW\_get\_ucd\_label** (int etype)
- int **HECMW\_is\_etype\_rod** (int etype)

*etype* がロッド要素かどうかを返す

- int **HECMW\_is\_etype\_surface** (int etype)
- etype* がサーフェイス要素かどうかを返す

- int **HECMW\_is\_etype\_solid** (int etype)
- etype* がソリッド要素かどうかを返す
- int **HECMW\_is\_etype\_interface** (int etype)
- etype* がインタフェース要素かどうかを返す

- int **HECMW\_is\_etype\_beam** (int etype)
- etype* がビーム要素かどうかを返す

- **int HECMW\_is\_etype\_shell** (int *etype*)

*etype* がシェル要素かどうかを返す

- **int HECMW\_is\_etype\_link** (int *etype*)

*etype* がリンク要素かどうかを返す

---

## 説明

要素情報を提供する

日付:

2004年2月16日

作者:

坂根 一彰

---

## 関数

**int HECMW\_get\_etype\_UTIL2HECMW** (int *etype*)

**int HECMW\_get\_etype\_HECMW2UTIL** (int *etype*)

**int HECMW\_get\_etype\_GeoFEM2HECMW** (int *etype*)

**int HECMW\_get\_max\_node** (int *etype*)

**int HECMW\_get\_max\_edge** (int *etype*)

**int HECMW\_get\_max\_surf (int *etype*)**

**int HECMW\_get\_max\_tsuf (int *etype*)**

**int HECMW\_get\_max\_qsuf (int *etype*)**

**char\* HECMW\_get\_ucd\_label (int *etype*)**

**int HECMW\_is\_etype\_rod (int *etype*)**

*etype*がロッド要素かどうかを返す

引数:

*etype* HEC-MW要素番号

戻り値:

ロッド要素なら1を返し，そうでなければ0を返す

**int HECMW\_is\_etype\_surface (int *etype*)**

*etype*がサーフェイス要素かどうかを返す

引数:

*etype* HEC-MW要素番号

戻り値:

サーフェイス要素なら1を返し，そうでなければ0を返す



### **int HECMW\_is\_etype\_solid (int etype)**

etypeがソリッド要素かどうかを返す

引数:

*etype* HEC-MW要素番号

戻り値:

ソリッド要素なら1を返し、そうでなければ0を返す

### **int HECMW\_is\_etype\_interface (int etype)**

etypeがインタフェース要素かどうかを返す

引数:

*etype* HEC-MW要素番号

戻り値:

インタフェース要素なら1を返し、そうでなければ0を返す

### **int HECMW\_is\_etype\_beam (int etype)**

etypeがビーム要素かどうかを返す

引数:

*etype* HEC-MW要素番号

戻り値:

ビーム要素なら1を返し，そうでなければ0を返す

### **int HECMW\_is\_etype\_shell (int etype)**

etypeがシェル要素かどうかを返す

#### **引数:**

*etype* HEC-MW要素番号

#### **戻り値:**

シェル要素なら1を返し，そうでなければ0を返す

### **int HECMW\_is\_etype\_link (int etype)**

etypeがリンク要素かどうかを返す

#### **引数:**

*etype* HEC-MW要素番号

#### **戻り値:**

リンク要素なら1を返し，そうでなければ0を返す

## hecmw\_finalize.h

HEC-MWの全体終了処理を行う。

### 関数

- `int HECMW_finalize (void)`  
*HEC-MWの全体終了処理を行う。*

---

### 説明

HEC-MW の全体終了処理を行う。  
全体終了処理では、以下の処理が行われる。

- 全体制御ファイル終了処理
- MPI終了処理

HEC-MW 利用プログラムは、この全体終了処理を実行してプログラムを終了しなければならない。

日付:

2004年2月16日

作者:

坂根 一彰

---

### 関数

`int HECMW_finalize (void)`

HEC-MWの全体終了処理を行う.

**戻り値:**

成功すれば0を返す. 失敗すれば-1を返し, `HECMW_set_error()`によってエラー情報がセットされる.

## hecmw\_geometric.h

幾何学的計算・変換処理を行う

### データ構造

- struct **hecmw\_coord**  
*座標を表す構造体*

### 関数

- double **HECMW\_degree\_to\_radian** (double deg)  
*角度からラジアンへの変換を行う*
  - double **HECMW\_radian\_to\_degree** (double rad)  
*ラジアンから角度への変換を行う*
  - int **HECMW\_cylindrical\_to\_cartesian** (const struct **hecmw\_coord** \*coord, struct **hecmw\_coord** \*result)  
*円筒座標から直行デカルト座標への変換を行う*
- 

### 説明

幾何学的計算・変換処理を行う

日付:

2004年2月16日

作者:

坂根 一彰

---

## 関数

**double HECMW\_degree\_to\_radian (double *deg*)**

角度からラジアンへの変換を行う

引数:

*deg* 角度

戻り値:

ラジアン

**double HECMW\_radian\_to\_degree (double *rad*)**

ラジアンから角度への変換を行う

引数:

*rad* ラジアン

戻り値:

角度

**int HECMW\_cylindrical\_to\_cartesian (const struct hecmw\_coord \* *coord*, struct hecmw\_coord \* *result*)**

円筒座標から直交デカルト座標への変換を行う

**引数:**

*coord* 変換元の円筒座標

*result* 変換後のデカルト座標格納領域

**戻り値:**

## hecmw\_gflex.h

GeoFEMメッシュデータの字句解析ルーチン.

```
#include <stdio.h>
```

### 列挙型

- enum { **HECMW\_GFLEX\_NL** = 1000, **HECMW\_GFLEX\_INT**,  
**HECMW\_GFLEX\_DOUBLE**, **HECMW\_GFLEX\_NAME** }  
トークン番号定義

### 関数

- int **HECMW\_gflex\_get\_lineno** (void)  
読み込んでいるファイルの現在の行番号を返す
- double **HECMW\_gflex\_get\_number** (void)  
直前に読み込んだトークンが数値であった場合、その値を返す
- char \* **HECMW\_gflex\_get\_text** (void)  
直前に読み込んだトークンの文字列表記を返す
- int **HECMW\_gflex\_next\_token** (void)  
次のトークンを返す
- int **HECMW\_gflex\_next\_token\_skip** (int skip\_token)  
次のトークンを返す
- int **HECMW\_gflex\_set\_input** (FILE \*fp)  
字句解析ルーチンで読み込むファイルのファイルポインタをセットする



- **int HECMW\_gflex\_skip\_line** (void)

現在読み込み中の行を読み飛ばし、その行の最後のトークン番号を返す

---

## 説明

GeoFEM メッシュデータの字句解析ルーチン.

日付:

2004年2月16日

作者:

坂根 一彰

---

## 列挙型

### anonymous enum

トークン番号定義

列挙型の値:

**HECMW\_GFLEX\_NL** 改行文字

**HECMW\_GFLEX\_INT** 整数

**HECMW\_GFLEX\_DOUBLE** 浮動小数点

**HECMW\_GFLEX\_NAME** 名前

---

## 関数

### **int HECMW\_gflex\_get\_lineno (void)**

読み込んでいるファイルの現在の行番号を返す

戻り値:

行番号

### **double HECMW\_gflex\_get\_number (void)**

直前に読み込んだトークンが数値であった場合、その値を返す

戻り値:

直前に読み込まれた数値

### **char\* HECMW\_gflex\_get\_text (void)**

直前に読み込んだトークンの文字列表記を返す

戻り値:

直前に読み込まれたトークンの文字列表記

### **int HECMW\_gflex\_next\_token (void)**

次のトークンを返す

EOFに達した場合は0を返す

戻り値:

次のトークン番号

### **int HECMW\_gflex\_next\_token\_skip (int *skip\_token*)**

次のトークンを返す

*skip\_token*で指定されたトークンの連続は読み飛ばされる。それ以外のトークンが現れたらそれを返す。EOFに達した場合は0を返す

戻り値:

次のトークン番号

### **int HECMW\_gflex\_set\_input (FILE \* *fp*)**

字句解析ルーチンで読み込むファイルのファイルポインタをセットする

引数:

*fp* 字句解析対象のファイルへのファイルポインタ

戻り値:

成功すれば0を返す。引数が無効なら-1を返す。

### **int HECMW\_gflex\_skip\_line (void)**

現在読み込み中の行を読み飛ばし、その行の最後のトークン番号を返す

戻り値:

現在の行の最後のトークン番号。EOFに達した場合は0を返す。

## hecmw\_heclex.h

HEC-MW単一領域メッシュデータの字句解析ルーチン.

```
#include <stdio.h>
```

### 列挙型

- enum { **HECMW\_HECLEX\_NL** = 1000, **HECMW\_HECLEX\_INT**,  
**HECMW\_HECLEX\_DOUBLE**, **HECMW\_HECLEX\_NAME**,  
**HECMW\_HECLEX\_FILENAME**, **HECMW\_HECLEX\_HEADER**,  
**HECMW\_HECLEX\_H\_AMPLITUDE** = 2000, **HECMW\_HECLEX\_H\_ECOPY**,  
**HECMW\_HECLEX\_H\_EGEN**, **HECMW\_HECLEX\_H\_EGROUP**,  
**HECMW\_HECLEX\_H\_ELEMENT**, **HECMW\_HECLEX\_H\_END**,  
**HECMW\_HECLEX\_H\_EQUATION**, **HECMW\_HECLEX\_H\_HEADER**,  
**HECMW\_HECLEX\_H\_INCLUDE**, **HECMW\_HECLEX\_H\_INITIAL**,  
**HECMW\_HECLEX\_H\_ITEM**, **HECMW\_HECLEX\_H\_MATERIAL**,  
**HECMW\_HECLEX\_H\_NCOPY**, **HECMW\_HECLEX\_H\_NFILL**,  
**HECMW\_HECLEX\_H\_NGEN**, **HECMW\_HECLEX\_H\_NGROUP**,  
**HECMW\_HECLEX\_H\_NODE**, **HECMW\_HECLEX\_H\_SECTION**,  
**HECMW\_HECLEX\_H\_SGROUP**, **HECMW\_HECLEX\_H\_SYSTEM**,  
**HECMW\_HECLEX\_H\_ZERO**, **HECMW\_HECLEX\_K\_ABSOLUTE** = 3000,  
**HECMW\_HECLEX\_K\_BEAM**, **HECMW\_HECLEX\_K\_COMPOSITE**,  
**HECMW\_HECLEX\_K\_DEFINITION**, **HECMW\_HECLEX\_K\_EGRP**,  
**HECMW\_HECLEX\_K\_GENERATE**, **HECMW\_HECLEX\_K\_INPUT**,  
**HECMW\_HECLEX\_K\_INTERFACE**, **HECMW\_HECLEX\_K\_ITEM**,  
**HECMW\_HECLEX\_K\_MATERIAL**, **HECMW\_HECLEX\_K\_MATITEM**,  
**HECMW\_HECLEX\_K\_NAME**, **HECMW\_HECLEX\_K\_NGRP**,  
**HECMW\_HECLEX\_K\_RELATIVE**, **HECMW\_HECLEX\_K\_SECOPT**,  
**HECMW\_HECLEX\_K\_SECTION**, **HECMW\_HECLEX\_K\_SGRP**,  
**HECMW\_HECLEX\_K\_SHELL**, **HECMW\_HECLEX\_K\_SOLID**,  
**HECMW\_HECLEX\_K\_STEP\_TIME**, **HECMW\_HECLEX\_K\_SUBITEM**,  
**HECMW\_HECLEX\_K\_SYSTEM**, **HECMW\_HECLEX\_K\_TABLE**,  
**HECMW\_HECLEX\_K\_TABULAR**, **HECMW\_HECLEX\_K\_TEMPERATURE**,

**HECMW\_HECLEX\_K\_TIME, HECMW\_HECLEX\_K\_TYPE,  
HECMW\_HECLEX\_K\_VALUE }**

トークン番号定義

## 関数

- **double HECMW\_heclex\_get\_number (void)**  
直前に読み込んだトークンが数値であった場合、その値を返す
- **char \* HECMW\_heclex\_get\_text (void)**  
直前に読み込んだトークンの文字列表記を返す
- **int HECMW\_heclex\_get\_lineno (void)**  
読み込んでいるファイルの現在の行番号を返す
- **int HECMW\_heclex\_next\_token (void)**  
次のトークンを返す
- **int HECMW\_heclex\_next\_token\_skip (int skip\_token)**  
次のトークンを返す
- **int HECMW\_heclex\_set\_input (FILE \*fp)**  
字句解析ルーチンで読み込むファイルのファイルポインタをセットする
- **int HECMW\_heclex\_skip\_line (void)**  
現在読み込み中の行を読み飛ばし、その行の最後のトークン番号を返す
- **int HECMW\_heclex\_switch\_to\_include (const char \*filename)**  
現在読み込み中の字句解析ルーチンを中断し、新たなファイル(インクルードファイル)を解析対象とする

- **int HECMW\_heclex\_unput\_token** (void)  
直前に読み込んだトークンを押し戻す
- **int HECMW\_heclex\_is\_including** (void)  
現在解析中のファイルがインクルードファイルか否かを返す

---

## 説明

HEC-MW 単一領域メッシュデータの字句解析ルーチン.

日付:

2004年2月16日

作者:

坂根 一彰

---

## 列挙型

### anonymous enum

トークン番号定義

列挙型の値:

**HECMW\_HECLEX\_NL** 改行文字

**HECMW\_HECLEX\_INT** 整数

**HECMW\_HECLEX\_DOUBLE** 浮動小数点

**HECMW\_HECLEX\_NAME** 名前

**HECMW\_HECLEX\_FILENAME** ファイル名

**HECMW\_HECLEX\_HEADER** ヘッダデータ

**HECMW\_HECLEX\_H\_AMPLITUDE** !AMPLITUDE

*HECMW\_HECLEX\_H\_ECOPY* !ECOPY  
*HECMW\_HECLEX\_H\_EGEN* !EGEN  
*HECMW\_HECLEX\_H\_EGROUP* !EGROUP  
*HECMW\_HECLEX\_H\_ELEMENT* !ELEMENT  
*HECMW\_HECLEX\_H\_END* !END  
*HECMW\_HECLEX\_H\_EQUATION* !EQUATION  
*HECMW\_HECLEX\_H\_HEADER* !HEADER  
*HECMW\_HECLEX\_H\_INCLUDE* !INCLUDE  
*HECMW\_HECLEX\_H\_INITIAL* !INITIAL CONDITION  
*HECMW\_HECLEX\_H\_ITEM* !ITEM  
*HECMW\_HECLEX\_H\_MATERIAL* !MATERIAL  
*HECMW\_HECLEX\_H\_NCOPY* !NCOPY  
*HECMW\_HECLEX\_H\_NFILL* !NFILL  
*HECMW\_HECLEX\_H\_NGEN* !NGEN  
*HECMW\_HECLEX\_H\_NGROUP* !NGROUP  
*HECMW\_HECLEX\_H\_NODE* !NODE  
*HECMW\_HECLEX\_H\_SECTION* !SECTION  
*HECMW\_HECLEX\_H\_SGROUP* !SGROUP  
*HECMW\_HECLEX\_H\_SYSTEM* !SYSTEM  
*HECMW\_HECLEX\_H\_ZERO* !ZERO  
*HECMW\_HECLEX\_K\_ABSOLUTE* ABSOLUTE.  
*HECMW\_HECLEX\_K\_BEAM* BEAM.  
*HECMW\_HECLEX\_K\_COMPOSITE* COMPOSITE.  
*HECMW\_HECLEX\_K\_DEFINITION* DEFINITION.  
*HECMW\_HECLEX\_K\_EGRP* EGRP.  
*HECMW\_HECLEX\_K\_GENERATE* GENERATE.  
*HECMW\_HECLEX\_K\_INPUT* INPUT.  
*HECMW\_HECLEX\_K\_INTERFACE* INTERFACE.  
*HECMW\_HECLEX\_K\_ITEM* ITEM.  
*HECMW\_HECLEX\_K\_MATERIAL* MATERIAL.  
*HECMW\_HECLEX\_K\_MATITEM* MATITEM.  
*HECMW\_HECLEX\_K\_NAME* NAME.  
*HECMW\_HECLEX\_K\_NGRP* NGRP.  
*HECMW\_HECLEX\_K\_RELATIVE* RELATIVE.  
*HECMW\_HECLEX\_K\_SECOPT* SECOPT.  
*HECMW\_HECLEX\_K\_SECTION* SECTION.

*HECMW\_HECLEX\_K\_SGRP* SGRP.  
*HECMW\_HECLEX\_K\_SHELL* SHELL.  
*HECMW\_HECLEX\_K\_SOLID* SOLID.  
*HECMW\_HECLEX\_K\_STEP\_TIME* STEP TIME.  
*HECMW\_HECLEX\_K\_SUBITEM* SUBITEM.  
*HECMW\_HECLEX\_K\_SYSTEM* SYSTEM.  
*HECMW\_HECLEX\_K\_TABLE* TABLE.  
*HECMW\_HECLEX\_K\_TABULAR* TABULAR.  
*HECMW\_HECLEX\_K\_TEMPERATURE* TEMPERATURE.  
*HECMW\_HECLEX\_K\_TIME* TIME.  
*HECMW\_HECLEX\_K\_TYPE* TYPE.  
*HECMW\_HECLEX\_K\_VALUE* VALUE.

---

## 関数

### **double HECMW\_heclex\_get\_number (void)**

直前に読み込んだトークンが数値であった場合、その値を返す

戻り値:

直前に読み込まれた数値

### **char\* HECMW\_heclex\_get\_text (void)**

直前に読み込んだトークンの文字列表記を返す

戻り値:

直前に読み込まれたトークンの文字列表記



### **int HECMW\_hecllex\_get\_lineno (void)**

読み込んでいるファイルの現在の行番号を返す

戻り値:

行番号

### **int HECMW\_hecllex\_next\_token (void)**

次のトークンを返す

EOFに達した場合は0を返す

戻り値:

次のトークン番号

### **int HECMW\_hecllex\_next\_token\_skip (int *skip\_token*)**

次のトークンを返す

*skip\_token*で指定されたトークンの連続は読み飛ばされる。 それ以外のトークンが現れたらそれを返す。 EOFに達した場合は0を返す

戻り値:

次のトークン番号

### **int HECMW\_hecllex\_set\_input (FILE \* *fp*)**

字句解析ルーチンで読み込むファイルのファイルポインタをセットする

引数:

*fp* 字句解析対象のファイルへのファイルポインタ

**戻り値:**

成功すれば0を返す。 引数が無効なら-1を返す。

**int HECMW\_heclex\_skip\_line (void)**

現在読み込み中の行を読み飛ばし、その行の最後のトークン番号を返す

**戻り値:**

現在の行の最後のトークン番号。 EOFに達した場合は0を返す。

**int HECMW\_heclex\_switch\_to\_include (const char \* *filename*)**

現在読み込み中の字句解析ルーチンを中断し、新たなファイル(インクルードファイル)を解析対象とする

解析中のファイルの情報は保存される。 インクルードファイルへの切替えは、この関数の呼び出し直後から有効になり、 次に返されるトークンはインクルードファイルのものとなる。

インクルードファイルのトークンがなくなると、自動的に保存されていた 状態に切り替わり、 前のファイルの解析が再開される。 インクルードファイルの解析が終了したことを通知することはないが、 **HECMW\_heclex\_is\_including()**によって、現在インクルードファイルを 読んでいるのか否かを知ることができる。

**引数:**

*filename* インクルードファイル名

**戻り値:**

成功すれば0を返す。 失敗すれば-1を返し、HECMW\_set\_error()によってエラー情報がセットされる。

### **int HECMW\_hecllex\_unput\_token (void)**

直前に読み込んだトークンを押し戻す

次回取得したトークンは、押し戻したトークンとなる.

**戻り値:**

常に0を返す.

### **int HECMW\_hecllex\_is\_including (void)**

現在解析中のファイルがインクルードファイルか否かを返す

**戻り値:**

インクルードファイル解析中なら1を返し、そうでなければ0を返す

## hecmw\_init.h

HEC-MWの全体初期化処理を行う。

### 関数

- `int HECMW_init (int *argc, char ***argv)`

*HEC-MWの初期化処理を行う。*

---

### 説明

HEC-MW の全体初期化処理を行う。

全体初期化処理では、以下の処理が行われる。

- MPI初期化処理
- 全体制御ファイル入力処理

HEC-MW のライブラリは、MPI を利用した並列処理を行うように作成されているため、プログラムの最初にこの初期化処理を必ず行う必要がある。

また、全体制御ファイル入力処理によって、HEC-MW の実行制御に必要な 情報が HEC-MW 全体制御ファイルから取得され、保持される。

この初期化処理を行った場合、プログラムの最後で `HECMW_finalize()` による終了処理を行わなくてはならない。

日付:

2004年2月16日

作者:

坂根 一彰

---

### 関数

**int HECMW\_init (int \* *argc*, char \*\*\* *argv*)**

HEC-MWの初期化処理を行う.

この関数によって初期化が正常終了して初めてHEC-MWのライブラリが 正常に動作するようになる.

参照:

**HECMW\_finalize()**

引数:

*argc* main関数の*argc*引数へのポインタ

*argv* main関数の*argv*引数へのポインタ

戻り値:

成功すれば0を返す. 失敗した場合は0以外の値を返し, `hecmw_set_error()`によってエラー情報がセットされる.

## hecmw\_io.h

IO関連のヘッダをインクルード.

```
#include "hecmw_geometric.h"
#include "hecmw_ablex.h"
#include "hecmw_gflex.h"
#include "hecmw_dist.h"
#include "hecmw_dist_copy_f2c.h"
#include "hecmw_dist_free.h"
#include "hecmw_dist_print.h"
#include "hecmw_hecllex.h"
#include "hecmw_io_dist.h"
#include "hecmw_io_geofem.h"
#include "hecmw_io_get_mesh.h"
#include "hecmw_io_hec.h"
#include "hecmw_io_abaqus.h"
#include "hecmw_io_mesh.h"
#include "hecmw_io_put_mesh.h"
#include "hecmw_io_struct.h"
#include "hecmw_restart.h"
#include "hecmw_result.h"
#include "hecmw_result_copy_c2f.h"
#include "hecmw_system.h"
```

---

## 説明

IO 関連のヘッダをインクルード.

削除予定

## hecmw\_io\_abaqus.h

ABAQUSメッシュデータ入力ルーチン.

```
#include <stdio.h>
```

```
#include "hecmw_struct.h"
```

### 関数

- **int HECMW\_read\_abaqus\_mesh** (const char \*filename)  
ABAQUSメッシュデータを読み込む.
- **hecmwST\_local\_mesh \* HECMW\_get\_abaqus\_mesh** (const char \*filename)  
ABAQUSメッシュデータを読み込み, メッシュデータ構造体を返す.

---

### 説明

ABAQUSメッシュデータ入力ルーチン.

ABAQUSメッシュデータを読み込む.

### 参照:

ABQUSメッシュデータ入力機能

### 日付:

2004年2月16日

### 作者:

坂根 一彰

---

### 関数

**int HECMW\_read\_abaqus\_mesh (const char \* *filename*)**

ABAQUSメッシュデータを読み込む。

入力処理を行うのみで、メッシュデータ構造体は生成しない。入力されたメッシュデータは保持されたままである。

**引数:**

*filename* メッシュファイル名(パス含む)

**戻り値:**

成功すれば0を返す。失敗すれば-1を返し、HECMW\_set\_error()によってエラー情報がセットされる。

**struct hecmwST\_local\_mesh\* HECMW\_get\_abaqus\_mesh (const char \* *filename*)**

ABAQUSメッシュデータを読み込み、メッシュデータ構造体を返す。

入力処理を行い、その結果得られたデータからメッシュデータ構造体を生成して返す。

**引数:**

*filename* メッシュファイル名(パス含む)

**戻り値:**

成功すればメッシュデータ構造体を返す。失敗すればNULLを返し、HECMW\_set\_error()によってエラー情報がセットされる。



## hecmw\_io\_dist.h

HEC-MW分散メッシュデータ入出力ルーチン.

```
#include "hecmw_struct.h"
```

### 関数

- **hecmwST\_local\_mesh \* HECMW\_get\_dist\_mesh** (char \*fname)  
*HEC-MW分散メッシュデータを読み込む.*
- **int HECMW\_put\_dist\_mesh** (const struct **hecmwST\_local\_mesh** \*mesh, const char \*fname)  
*HEC-MW分散メッシュデータを出力する.*

---

### 説明

HEC-MW 分散メッシュデータ入出力ルーチン.

HEC-MW 分散メッシュデータを入力・出力する.

日付:

2004年2月16日

作者:

坂根 一彰

---

### 関数

**struct hecmwST\_local\_mesh\* HECMW\_get\_dist\_mesh** (char \* *fname*)

HEC-MW分散メッシュデータを読み込む.

入力処理を行い，その結果得られたデータからメッシュデータ構造体を生成して返す．

**引数:**

*fname* メッシュファイル名(パス含む)

**戻り値:**

成功すればメッシュデータ構造体を返す．失敗すればNULLを返し，HECMW\_set\_error()によってエラー情報がセットされる．

**int HECMW\_put\_dist\_mesh (const struct hecmwST\_local\_mesh \* *mesh*, const char \* *fname*)**

HEC-MW分散メッシュデータを出力する．

メッシュデータ構造体の内容をファイルに出力する．

**引数:**

*mesh* 出力するメッシュデータ構造体

*fname* メッシュファイル名(パス含む)

**戻り値:**

成功すれば0を返す．失敗すれば-1を返し，HECMW\_set\_error()によってエラー情報がセットされる．

## hecmw\_io\_geofem.h

GeoFEMメッシュデータ入力ルーチン.

```
#include <stdio.h>
```

```
#include "hecmw_util.h"
```

### 関数

- **int HECMW\_read\_geofem\_mesh** (const char \*filename)  
*GeoFEMメッシュデータを読み込む.*
- **hecmwST\_local\_mesh \* HECMW\_get\_geofem\_mesh** (const char \*filename)  
*GeoFEMメッシュデータを読み込み, メッシュデータ構造体を返す.*

---

### 説明

GeoFEMメッシュデータ入力ルーチン.

GeoFEMメッシュデータを読み込む. 対応するのは初期メッシュデータのみで, 分散メッシュデータには対応しない.

日付:

2004年2月16日

作者:

坂根 一彰

---

### 関数

**int HECMW\_read\_geofem\_mesh** (const char \* *filename*)

GeoFEMメッシュデータを読み込む。

入力処理を行うのみで、メッシュデータ構造体は生成しない。 入力されたメッシュデータは保持されたままである。

**引数:**

*filename* メッシュファイル名(パス含む)

**戻り値:**

成功すれば0を返す。 失敗すれば-1を返し、HECMW\_set\_error()によってエラー情報がセットされる。

**struct hecmwST\_local\_mesh\* HECMW\_get\_geofem\_mesh (const char \* *filename*)**

GeoFEMメッシュデータを読み込み、メッシュデータ構造体を返す。

入力処理を行い、その結果得られたデータからメッシュデータ構造体を生成して返す。

**引数:**

*filename* メッシュファイル名(パス含む)

**戻り値:**

成功すればメッシュデータ構造体を返す。 失敗すればNULLを返し、HECMW\_set\_error()によってエラー情報がセットされる。

## hecmw\_io\_get\_mesh.h

メッシュデータ取得ルーチン

```
#include "hecmw_struct.h"
```

### 関数

- **hecmwST\_local\_mesh \* HECMW\_get\_mesh** (char \*name\_ID)  
メッシュデータを読み込み, メッシュデータ構造体に格納して返す

---

### 説明

メッシュデータ取得ルーチン

メッシュファイルを読み込み, メッシュデータを取得する. 取得したメッシュデータは, メッシュデータ構造体(**hecmwST\_local\_mesh**)に 格納されて返される.

メッシュファイルの定義は, 全体制御ファイルにて行う. メッシュデータ取得ルーチンは, 全体制御ファイルで定義される情報をもとに 読み込むべきメッシュファイルを決するため, その定義は必須である.

全体制御ファイルでメッシュファイルを定義するには, **!MESH** と **!MESH GROUP** を使用する. それぞれの定義において **NAME** パラメータの定義が必須になっており, それが読み込み対象とするメッシュファイルの判別に使用される.

メッシュデータ取得ルーチンによって読み込み可能なメッシュのタイプを以下に示す.

- HEC-MW分散メッシュデータ
- HEC-MW単一領域メッシュデータ
- GeoFEM単一領域メッシュデータ
- ABAQUSメッシュデータ
- NASTRANメッシュデータ(現版では未対応)
- FEMAPメッシュデータ(現版では未対応)

それぞれのメッシュタイプの定義は、全体制御ファイルにて行う。メッシュデータ取得ルーチンは、読み込むメッシュのタイプを!MESH の定義から自動的に判別するため、そのルーチン使用時にメッシュタイプを考慮する必要はない。また、これらのメッシュデータは、同一のメッシュデータ取得ルーチンによって取得可能であり、取得した結果得られる構造体は、全てメッシュデータ構造体が使用される。このように、メッシュタイプによって、メッシュの取得方法や、得られるデータ構造が異なることはなく、全て統一的に操作が可能である。グループ化されたメッシュを読み込み対象として指定した場合、メッシュデータ取得ルーチンは、その定義によってグループ化されている複数のファイルを同時に読み込み、一つのメッシュデータ構造体を生成する。これは、メッシュファイルが複数に分割されている場合や、異なるタイプのメッシュを混在させたい場合に便利である。

参照:

HECMW\_get\_mesh()

日付:

2004年2月16日

作者:

坂根 一彰

---

## 関数

**struct hecmwST\_local\_mesh\* HECMW\_get\_mesh (char \* *name\_ID*)**

メッシュデータを読み込み、メッシュデータ構造体に格納して返す

読み込み対象となるメッシュファイル名は、全体制御ファイルから取得する。

引数:

*name\_ID* 読み込み対象となるメッシュを識別するための、!MESHまたは!MESH GROUPにおけるNAMEパラメータ

**戻り値:**

成功すれば、読み込んだメッシュデータを格納したメッシュデータ構造体を返す。失敗すればNULLを返し、HECMW\_set\_error()によってエラー情報がセットされる。

## hecmw\_io\_hec.h

HEC-MW単一領域メッシュデータ入力ルーチン.

```
#include <stdio.h>
#include "hecmw_struct.h"
```

### 関数

- **int HECMW\_read\_entire\_mesh** (const char \*filename)  
*HEC-MW単一領域メッシュデータを読み込む.*
- **hecmwST\_local\_mesh \* HECMW\_get\_entire\_mesh** (const char \*filename)  
*HEC-MW単一領域メッシュデータを読み込み, メッシュデータ構造体を返す.*

---

### 説明

HEC-MW 単一領域メッシュデータ入力ルーチン.  
HEC-MW 単一領域メッシュデータを読み込む.

日付:

2004年2月16日

作者:

坂根 一彰

---

### 関数

**int HECMW\_read\_entire\_mesh** (const char \* *filename*)



HEC-MW単一領域メッシュデータを読み込む.

入力処理を行うのみで、メッシュデータ構造体は生成しない。 入力されたメッシュデータは保持されたままである.

**引数:**

*filename* メッシュファイル名(パス含む)

**戻り値:**

成功すれば0を返す。 失敗すれば-1を返し、HECMW\_set\_error()によってエラー情報がセットされる.

**struct hecmwST\_local\_mesh\* HECMW\_get\_entire\_mesh (const char \* *filename*)**

HEC-MW単一領域メッシュデータを読み込み、メッシュデータ構造体を返す.

入力処理を行い、その結果得られたデータからメッシュデータ構造体を生成して返す.

**引数:**

*filename* メッシュファイル名(パス含む)

**戻り値:**

成功すればメッシュデータ構造体を返す。 失敗すればNULLを返し、HECMW\_set\_error()によってエラー情報がセットされる.

## hecmw\_io\_mesh.h

全体メッシュデータの取得とメッシュデータ構造体生成

```
#include <stdio.h>
#include "hecmw_util.h"
#include "hecmw_io_struct.h"
#include "hecmw_system.h"
```

### 関数

- **int HECMW\_io\_get\_version** (void)  
*#HECMW\_FLAG\_VERSIONを返す*
- **int HECMW\_io\_init** (void)  
*初期化処理を行う.*
- **int HECMW\_io\_finalize** (void)  
*終了処理を行う*
- **void HECMW\_io\_print\_all** (FILE \*fp)  
*現在貯め込んでいるメッシュ情報をfpに出力する*
- **int HECMW\_io\_free\_all** (void)  
*現在貯め込んでいるメッシュ情報のメモリ領域を解放する*
- **int HECMW\_io\_set\_gridfile** (char \*gridfile)  
*gridfileをセットする*
- **hecmw\_io\_amplitude \* HECMW\_io\_add\_amp** (const char \*name, int definition, int time, int value, double val, double t)  
*AMPLITUDE情報を追加する.*

- **hecmw\_io\_initial \* HECMW\_io\_get\_initial** (int node)  
節点の初期条件を取得する
- **hecmw\_io\_initial \* HECMW\_io\_add\_initial** (int type, int node, const char \*ngrp, double val)  
初期条件を追加する
- **hecmw\_io\_element \* HECMW\_io\_get\_elem** (int id)  
要素情報を取得する
- **int HECMW\_io\_get\_n\_elem** (void)  
現在の保持されている要素数を取得する
- **int HECMW\_io\_get\_elem\_max\_id** (void)  
最大のグローバル要素番号を取得する
- **hecmw\_io\_element \* HECMW\_io\_add\_elem** (int id, int type, int \*node, int nmatitem, double \*matitem)  
要素を追加する
- **hecmw\_io\_id\_array \* HECMW\_io\_get\_elem\_in\_egrp** (const char \*name)  
要素グループに含まれる要素を取得する
- **hecmw\_io\_egrp \* HECMW\_io\_get\_egrp** (const char \*name)  
要素グループを取得する
- **int HECMW\_io\_add\_egrp** (const char \*name, int nelem, int \*elem)  
要素グループを追加する
- **hecmw\_io\_node \* HECMW\_io\_get\_node** (int id)  
節点を取得する

- **int HECMW\_io\_get\_n\_node** (void)  
現在の節点数を取得する
- **hecmw\_io\_node \* HECMW\_io\_add\_node** (int id, double x, double y, double z)  
節点を追加する
- **int HECMW\_io\_get\_nnode\_in\_ngrp** (const char \*name)  
節点グループに含まれる節点数を取得する
- **int HECMW\_io\_remove\_node** (int id)  
節点を削除する
- **hecmw\_io\_ngrp \* HECMW\_io\_get\_ngrp** (const char \*name)  
節点グループを取得する
- **hecmw\_io\_id\_array \* HECMW\_io\_get\_node\_in\_ngrp** (const char \*name)  
節点グループに含まれる節点を取得する
- **int HECMW\_io\_add\_ngrp** (const char \*name, int nnode, int \*node)  
節点グループを追加する
- **int HECMW\_io\_add\_sgrp** (const char \*name, int n, int \*elem, int \*surf)  
面グループを追加する
- **hecmw\_io\_mpc \* HECMW\_io\_add\_mpc** (int neq, const struct hecmw\_io\_mpcitem \*mpcitem)  
拘束グループ情報を追加する
- **hecmw\_io\_section \* HECMW\_io\_add\_sect** (struct hecmw\_io\_section \*sect)  
セクション情報を追加する
- **hecmw\_io\_material \* HECMW\_io\_get\_mat** (const char \*name)

材料情報を取得する

- **hecmw\_io\_material \* HECMW\_io\_add\_mat** (struct **hecmw\_io\_material** \*mat)

材料情報を追加する

- **void HECMW\_io\_set\_header** (struct **hecmw\_io\_header** \*header)

ヘッダをセットする

- **hecmw\_system\_param \* HECMW\_io\_get\_system** (void)

局所座量から全体座標への変換パラメータを取得する

- **void HECMW\_io\_set\_system** (struct **hecmw\_system\_param** \*system)

局所座量から全体座標への変換パラメータをセットする

- **void HECMW\_io\_set\_zero** (struct **hecmw\_io\_zero** \*zero)

絶対零度をセットする

- **int HECMW\_io\_post\_process** (void)

入力終了後の後処理を行う

- **int HECMW\_io\_pre\_process** (void)

入力ルーチンの前処理を行う

- **int HECMW\_io\_check\_mpc\_dof** (int dof)

拘束グループの自由度をチェックする

- **int HECMW\_io\_is\_reserved\_name** (const char \*name)

名前が予約済みでないかどうかをチェックする

- **hecmwST\_local\_mesh \* HECMW\_io\_make\_local\_mesh** (void)

メッシュデータ構造体を生成する

---

## 説明

全体メッシュデータの取得とメッシュデータ構造体生成  
読み込まれた全体メッシュデータは本ルーチンを通じて蓄えられ、メッシュデータ構造体へと変換される。  
HECMW\_io\_get\_\*( ),HECMW\_io\_set\_\*( ),HECMW\_io\_add\_\*( ) は全て一時領域のメッシュデータに対するものである。

日付:

2004年2月16日

作者:

坂根 一彰

---

## 関数

### int HECMW\_io\_get\_version (void)

#HECMW\_FLAG\_VERSIONを返す

戻り値:

#HECMW\_FLAG\_VERSION

### int HECMW\_io\_init (void)

初期化処理を行う。

既にデータが蓄えられていれば、それらを解放し、初期化する。

戻り値:

成功すれば0を返す。失敗すれば-1を返す。

### **int HECMW\_io\_finalize (void)**

終了処理を行う

蓄えられているデータのメモリ領域は解放される。

**戻り値:**

成功すれば0を返す。失敗すれば-1を返し、HECMW\_set\_error()によってエラー情報がセットされる。

### **void HECMW\_io\_print\_all (FILE \* fp)**

現在貯め込んでいるメッシュ情報をfpに出力する

**引数:**

*fp* 出力先ファイルポインタ

### **int HECMW\_io\_free\_all (void)**

現在貯め込んでいるメッシュ情報のメモリ領域を解放する

**戻り値:**

成功すれば0を返す。失敗すれば-1を返し、HECMW\_set\_error()によってエラー情報がセットされる。

### **int HECMW\_io\_set\_gridfile (char \* *gridfile*)**

gridfileをセットする

**引数:**

*gridfile* ファイル名. NULLは空文字列とみなされる.

**戻り値:**

常に成功し, 0を返す.

**struct hecmw\_io\_amplitude\* HECMW\_io\_add\_amp (const char \* *name*, int *definition*, int *time*, int *value*, double *val*, double *t*)**

AMPLITUDE情報を追加する.

**引数:**

*name* AMPLITUDE名

*definition* AMPLITUDEタイプ

*time* 時刻の種類

*value* 値の種類

*val* 時刻*t*における値

*t* 時刻*t*

**戻り値:**

成功すれば, 追加したAMPLITUDE情報を返す. 失敗すればNULLを返し,  
HECMW\_set\_error()によってエラー情報がセットされる.

**struct hecmw\_io\_initial\* HECMW\_io\_get\_initial (int *node*)**

節点の初期条件を取得する

**引数:**

*node* グローバル節点番号



**戻り値:**

節点の初期条件が見付かればその情報を返す。 見付からない場合はNULLを返す。

**struct hecmw\_io\_initial\* HECMW\_io\_add\_initial (int *type*, int *node*, const char \*  
*ngrp*, double *val*)**

初期条件を追加する

節点の指定方法は、グローバル節点番号を指定する場合と、 節点グループを指定してそれに含まれる全ての節点を指定する場合がある。 引数`ngrp`がNULLでなければ節点グループ名による指定とみなされ、 `ngrp`がNULLの場合は、節点番号による指定とみなされる。

**引数:**

*type* 初期条件の種類

*node* 初期条件を与える節点のグローバル節点番号

*ngrp* 初期条件を与える節点の節点グループ名

*val* 初期条件の値

**戻り値:**

成功すれば追加した初期条件情報を返す。 失敗すればNULLを返し、HECMW\_set\_error()によってエラー情報がセットされる。

**struct hecmw\_io\_element\* HECMW\_io\_get\_elem (int *id*)**

要素情報を取得する

引数で指定されたグローバル要素番号を持つ要素の情報を取得する

**引数:**

*id* グローバル要素番号

**戻り値:**

グローバル要素番号`id`を持つ要素が見付かれればその情報を返す. 見付からなければ  
NULLを返す.

**int HECMW\_io\_get\_n\_elem (void)**

現在の保持されている要素数を取得する

**int HECMW\_io\_get\_elem\_max\_id (void)**

最大のグローバル要素番号を取得する

**struct hecmw\_io\_element\* HECMW\_io\_add\_elem (int *id*, int *type*, int \* *node*, int  
*nmatitem*, double \* *matitem*)**

要素を追加する

引数:

*id* グローバル要素番号

*type* 要素タイプ

*node* コネクティビティ

*nmatitem* 材料物性値の個数

*matitem* 材料物性値

戻り値:

成功すれば, 追加した要素情報を返す. 失敗すればNULLを返し, HECMW\_set\_error()  
によってエラー情報がセットされる.

**struct hecmw\_io\_id\_array\* HECMW\_io\_get\_elem\_in\_egrp (const char \* *name*)**

要素グループに含まれる要素を取得する

**引数:**

*name* 要素グループ名

**戻り値:**

成功すれば、要素グループに含まれる全要素のグローバル要素番号を返す。失敗すればNULLを返し、HECMW\_set\_error()によってエラー情報がセットされる。 *name*に対応する要素グループが存在しない場合もNULLを返すが、エラー情報をセットしない。区別がつかないので、要修正。

**struct hecmw\_io\_egrp\* HECMW\_io\_get\_egrp (const char \* *name*)**

要素グループを取得する

**引数:**

*name* 要素グループ名

**戻り値:**

成功すれば、*name*で示される名前の要素グループ情報を返す。失敗すればNULLを返し、HECMW\_set\_error()によってエラー情報がセットされる。

**int HECMW\_io\_add\_egrp (const char \* *name*, int *nelem*, int \* *elem*)**

要素グループを追加する

*name*で示される名前の要素グループを追加し、それに含まれる要素を登録する。 *name*に対応する要素グループが存在しない場合は要素グループが新規に作成され、既に存在する場合は、既存グループに要素が追加される。

**引数:**

*name* 要素グループ名

*nelem* 追加する要素数

*elem* 追加する要素のグローバル要素番号

戻り値:

成功すれば追加した要素数を返す. 失敗すれば-1を返し, `HECMW_set_error()`によってエラー情報がセットされる.

**struct hecmw\_io\_node\* HECMW\_io\_get\_node (int *id*)**

節点を取得する

引数:

*id* グローバル節点番号

戻り値:

対応する節点があれば, その情報を返す. そうでなければNULLを返す.

**int HECMW\_io\_get\_n\_node (void)**

現在の節点数を取得する

戻り値:

現在の節点数

**struct hecmw\_io\_node\* HECMW\_io\_add\_node (int *id*, double *x*, double *y*, double *z*)**

節点を追加する

**引数:**

*id* グローバル節点番号  
*x* X座標値  
*y* Y座標値  
*z* Z座標値

**戻り値:**

成功すれば追加した節点情報を返す. 失敗すればNULLを返し, `HECMW_set_error()`によってエラー情報がセットされる.

**int HECMW\_io\_get\_nnode\_in\_ngrp (const char \* *name*)**

節点グループに含まれる節点数を取得する

**引数:**

*name* 節点グループ名

**戻り値:**

成功すれば, 節点グループに含まれる要素の個数を返す. 失敗すれば-1を返し, `HECMW_set_error()`によってエラー情報がセットされる.

**int HECMW\_io\_remove\_node (int *id*)**

節点を削除する

**引数:**

*id* 削除する節点のグローバル節点番号

**戻り値:**

成功すれば, 削除した件数(1)を返す. 削除する節点が見付からなければ0を返す.

**struct hecmw\_io\_ngrp\* HECMW\_io\_get\_ngrp (const char \* *name*)**

節点グループを取得する

引数:

*name* 節点グループ名

戻り値:

*name*で指定された名前を持つ節点グループ情報を返す。見付からなければNULLを返す。

**struct hecmw\_io\_id\_array\* HECMW\_io\_get\_node\_in\_ngrp (const char \* *name*)**

節点グループに含まれる節点を取得する

引数:

*name* 節点グループ名

戻り値:

*name*に対応する節点グループに含まれる全節点のグローバル節点番号を返す。失敗すればNULLを返し、HECMW\_set\_error()によってエラー情報がセットされる。*name*に対応する節点グループが存在しない場合もNULLを返すが、エラー情報をセットしない。区別がつかないので、要修正。

**int HECMW\_io\_add\_ngrp (const char \* *name*, int *nnode*, int \* *node*)**

節点グループを追加する

*name*で示される名前の節点グループを追加し、それに含まれる節点を登録する。*name*に対応する節点グループが存在しない場合は節点グループが新規に作成され、既に存在する場合は、既存グループに節点が追加される。

**引数:**

*name* 節点グループ名

*nnode* 追加する節点数

*node* 追加する節点のグローバル節点番号

**戻り値:**

成功すれば追加した節点数を返す。失敗すれば-1を返し、HECMW\_set\_error()によってエラー情報がセットされる。

**int HECMW\_io\_add\_sgrp (const char \* *name*, int *n*, int \* *elem*, int \* *surf*)**

面グループを追加する

*name*で示される名前の面グループを追加し、それに含まれる要素と面番号のペアを登録する。  
*name*に対応する面グループが存在しない場合は面グループが新規に作成され、既に存在する場合は、既存グループに要素と面番号のペアが追加される。

**引数:**

*name* 面グループ名

*n* 追加する要素と面番号のペア

*elem* 追加する要素のグローバル要素番号

*surf* 追加する要素の面番号

**戻り値:**

成功すれば追加した節点数を返す。失敗すれば-1を返し、HECMW\_set\_error()によってエラー情報がセットされる。

**struct hecmw\_io\_mpc\* HECMW\_io\_add\_mpc (int *neq*, const struct hecmw\_io\_mpcitem \* *mpcitem*)**

拘束グループ情報を追加する

**引数:**

*neq* 方程式の項数

*mpcitem* 拘束グループ情報. 必要な情報はここからコピーされる.

**戻り値:**

成功すれば, 追加した拘束グループ情報を返す. 失敗すればNULLを返し,

HECMW\_set\_error()によってエラー情報がセットされる.

**struct hecmw\_io\_section\* HECMW\_io\_add\_sect (struct hecmw\_io\_section \* sect)**

セクション情報を追加する

**引数:**

*sect* 追加するセクション情報. 必要な情報はここからコピーされる.

成功すれば, 追加したセクション情報を返す. 失敗すればNULLを返し,

HECMW\_set\_error()によってエラー情報がセットされる.

**struct hecmw\_io\_material\* HECMW\_io\_get\_mat (const char \* name)**

材料情報を取得する

**引数:**

*name* 材料名

**戻り値:**

*name*に対応する材料情報が見付かれればその情報を返す. 見付からなければNULLを返す.



**struct hecmw\_io\_material\* HECMW\_io\_add\_mat (struct hecmw\_io\_material \*  
*mat*)**

材料情報を追加する

**引数:**

*mat* 材料情報. この情報はそのまま追加されるため、領域を解放したり内容を変更してはならない.

**戻り値:**

成功すれば、追加した材料情報を返す. 失敗すればNULLを返し、HECMW\_set\_error()によってエラー情報がセットされる.

**void HECMW\_io\_set\_header (struct hecmw\_io\_header \* *header*)**

ヘッダをセットする

**引数:**

*header* ヘッダ情報. この情報はそのまま追加されるため、領域を解放したり内容を変更してはならない.

**struct hecmw\_system\_param\* HECMW\_io\_get\_system (void)**

局所座量から全体座標への変換パラメータを取得する

**戻り値:**

局所座量から全体座標への変換パラメータを返す. なければNULLを返す.

**void HECMW\_io\_set\_system (struct hecmw\_system\_param \* *system*)**

局所座量から全体座標への変換パラメータをセットする

引数:

*system* 局所座量から全体座標への変換パラメータ この情報はそのまま追加されるため、領域を解放したり内容を変更してはならない.

**void HECMW\_io\_set\_zero (struct hecmw\_io\_zero \* zero)**

絶対零度をセットする

引数:

*zero* 絶対零度情報 この情報はそのまま追加されるため、領域を解放したり内容を変更してはならない.

**int HECMW\_io\_post\_process (void)**

入力終了後の後処理を行う

入力が終了したものととして、現在保持されている情報に対し後処理を実行する.

**int HECMW\_io\_pre\_process (void)**

入力ルーチンの前処理を行う

入力を実行する前に実行しなければならない. ただし、現在は何も行わない.

**int HECMW\_io\_check\_mpc\_dof (int dof)**

拘束グループの自由度をチェックする

引数:

*dof* チェックする自由度

戻り値:

正しければ0を返し，そうでなければ-1を返す.

**int HECMW\_io\_is\_reserved\_name (const char \* *name*)**

名前が予約済みでないかどうかをチェックする

HECMWで始まる名前は予約されている.

引数:

*name* チェックする名前

戻り値:

予約済であれば1を返し，そうでなければ0を返す.

**struct hecmwST\_local\_mesh\* HECMW\_io\_make\_local\_mesh (void)**

メッシュデータ構造体を生成する

戻り値:

成功すればメッシュデータ構造体を返す. 失敗すればNULLを返し, HECMW\_set\_error() によってエラー情報がセットされる.

## hecmw\_io\_put\_mesh.h

メッシュデータをファイルに出力する

```
#include "hecmw_struct.h"
```

### 関数

- **int HECMW\_put\_mesh** (struct **hecmwST\_local\_mesh** \*mesh, char \*name\_ID)  
メッシュデータをファイルに出力する

---

### 説明

メッシュデータをファイルに出力する

日付:

2004年2月16日

作者:

坂根 一彰

---

### 関数

**int HECMW\_put\_mesh** (struct **hecmwST\_local\_mesh** \* *mesh*, char \* *name\_ID*)

メッシュデータをファイルに出力する

メッシュデータを分散メッシュデータとして出力する。領域が1つであっても、分散メッシュデータとして出力される。出力されるファイルは、全体制御ファイルの!MESHのうち、NAMEがname\_IDのものとなる。出力されるファイル名は、全体制御ファイルから取得したファイル名の末尾に「.<ランク番号>」を付加したものとなる。

**引数:**

*mesh* 出力メッシュデータ

*name\_ID* メッシュファイル識別子

**戻り値:**

成功すれば0を返す。失敗すれば-1を返し、HECMW\_set\_error()によってエラー情報がセットされる。

## hecmw\_io\_struct.h

メッシュデータ入力時に使用するデータ構造

```
#include "hecmw_config.h"
#include "hecmw_set_int.h"
```

### データ構造

- struct **hecmw\_io\_id\_array**  
*int型IDの配列を表す*
- struct **hecmw\_io\_id**  
*int型IDの単方向リンクリストを表す*
- struct **hecmw\_io\_header**  
*ヘッダ情報*
- struct **hecmw\_io\_zero**  
*絶対零度情報*
- struct **hecmw\_io\_node**  
*節点情報*
- struct **hecmw\_io\_element**  
*要素情報*
- struct **hecmw\_io\_ngrp**  
*節点グループ情報*
- struct **hecmw\_io\_egrp**

## 要素グループ情報

- struct **hecmw\_io\_elem\_surf**  
面グループアイテム
- struct **hecmw\_io\_sgrp**  
面グループ情報
- struct **hecmw\_io\_mpc**  
拘束グループ情報
- struct **hecmw\_io\_mpc::hecmw\_io\_mpcitem**  
拘束グループアイテム
- struct **hecmw\_io\_amplitude**  
AMPLITUDE 情報.
- struct **hecmw\_io\_amplitude::hecmw\_io\_amplitude\_item**  
AMPLITUDE アイテム.
- struct **hecmw\_io\_initial**  
初期条件情報
- struct **hecmw\_io\_material**  
材料情報
- struct **hecmw\_io\_material::hecmw\_io\_matitem**  
材料ITEM
- struct **hecmw\_io\_material::hecmw\_io\_matitem::hecmw\_io\_matsubitem**  
材料SUBITEM

- struct **hecmw\_io\_section**  
セクション情報
- union **hecmw\_io\_section::hecmw\_io\_section\_item**  
セクションアイテム
- struct **hecmw\_io\_section::hecmw\_io\_section\_item::hecmw\_io\_section\_solid**  
ソリッドセクション
- struct **hecmw\_io\_section::hecmw\_io\_section\_item::hecmw\_io\_section\_shell**  
シェルセクション
- struct **hecmw\_io\_section::hecmw\_io\_section\_item::hecmw\_io\_section\_interface**  
インタフェースセクション

## マクロ定義

- #define **HECMW\_INITIAL\_TYPE\_TEMPERATURE** 1

---

## 説明

メッシュデータ入力時に使用するデータ構造

---

## マクロ定義

- #define **HECMW\_INITIAL\_TYPE\_TEMPERATURE** 1



## hecmw\_lib\_fc.h

FortranとC間のデータ変換ユーティリティ.

### 関数

- char \* **HECMW\_strepy\_f2c** (const char \*fstr, int flen)  
*Fortran 文字列をC文字列に変換する.*
- char \* **HECMW\_strepy\_f2c\_r** (const char \*fstr, int flen, char \*buf, int bufsize)  
*Fortran 文字列をC文字列に変換する.*
- int **HECMW\_strepy\_c2f** (const char \*cstr, char \*fstr, int flen)  
*C文字列をFortran文字列列に変換する.*

---

### 説明

Fortran と C 間のデータ変換ユーティリティ.

日付:

2004年2月16日

作者:

坂根 一彰

---

### 関数

char\* **HECMW\_strcpy\_f2c** (const char \* *fstr*, int *flen*)

Fortran文字列をC文字列に変換する.

変換された文字列の領域は動的に割り当てられる.

**引数:**

*fstr* Fortran文字列

*flen* Fortran文字列の長さ

**戻り値:**

C文字列

**char\* HECMW\_strcpy\_f2c\_r (const char \* *fstr*, int *flen*, char \* *buf*, int *bufsize*)**

Fortran文字列をC文字列に変換する.

変換された文字列の領域は引数で与える

**引数:**

*fstr* Fortran文字列

*flen* Fortran文字列の長さ

*buf* C文字列格納用領域

*bufsize* bufの大きさ

**戻り値:**

C文字列

**int HECMW\_strcpy\_c2f (const char \* *cstr*, char \* *fstr*, int *flen*)**

C文字列をFortran文字列に変換する.

**引数:**

*cstr* C文字列

*fstr* Fortran文字列

*flen* Fortran文字列の長さ

戻り値:

変換後のFortran文字列の長さ

## hecmw\_log.h

ログ出力を可能とするための関数ライブラリ

```
#include <stdarg.h>
```

### マクロ定義

- `#define HECMW_LOG_MAX 10`  
指定可能なログファイルの上限
- `#define HECMW_LOG_NONE 0`  
ログレベルを指定しない
- `#define HECMW_LOG_ERROR 1`  
エラーを示すログレベル
- `#define HECMW_LOG_WARN 2`  
警告を示すログレベル
- `#define HECMW_LOG_INFO 4`  
情報を示すログレベル
- `#define HECMW_LOG_DEBUG 8`  
デバッグを示すログレベル
- `#define HECMW_LOG_ALL (HECMW_LOG_ERROR|HECMW_LOG_WARN|HECMW_LOG_INFO|HECMW_LOG_DEBUG)`  
全てのログレベルを包含する

- `#define HECMW_LOG_PERROR 1`  
標準エラー出力に出力する
- `#define HECMW_LOG_OPTALL (HECMW_LOG_PERROR)`  
全てのオプションを包含する

## 関数

- `int HECMW_openlog (const char *logfile, int loglv, int options)`  
ログファイルを開く
- `int HECMW_closelog (const char *logfile)`  
ログファイルを閉じる
- `int HECMW_vlog (int loglv, const char *fmt, va_list ap)`  
ログを出力する
- `int HECMW_log (int loglv, const char *fmt,...)`  
ログを出力する
- `void HECMW_setloglv (int loglv)`  
出力ログレベルの指定

---

## 説明

ログ出力を可能とするための関数ライブラリ  
システムやアプリケーションが必要とするさまざまな情報を出力可能とする。  
ログは、複数のファイルに出力することが可能である。出力先は基本的にファイルであるが、オプションにより標準エラー出力を追加することができる。また、出力先を全く指定しない場合は標準エラー出力に出力される。

ログには以下の 4 つのログレベルがあり、出力先ごとにそのファイルが受け付けるログレベルを指定可能である。

- **HECMW\_LOG\_ERROR**
- **HECMW\_LOG\_WARN**
- **HECMW\_LOG\_INFO**
- **HECMW\_LOG\_DEBUG**

また、次のログレベルは定義可能なログレベル全てを含んでいる。

- **HECMW\_LOG\_ALL**

ログレベルは **HECMW\_LOG\_ERROR** が一番高く、**HECMW\_LOG\_WARN**,**HECMW\_LOG\_INFO**,**HECMW\_LOG\_DEBUG** の順に低くなる。

ログレベルは、

- ログファイルに出力するメッセージ
- ログファイル
- ログ出力レベル

の 3 つに対して設定する。

メッセージに対するログレベル設定では、メッセージそのもののレベルを定義する。

一方、ログファイルに対するレベル設定では、出力先のログファイルがどのレベルのログを受け付けるかを指定する。このログレベルには複数のレベルを設定することが可能であり、必要なレベルのログだけを受け付けるようにすることができる。

また、ログ出力レベルでは、ログ出力関数が出力を許可するログレベルを設定する。指定するレベルは、出力を許可するレベルのうち、最も低いレベルである。これは、前述の 2 つのログレベルより優先される。従って、ログ出力レベルで許可されていないレベルのログが出力されることはない。デフォルトの出力レベルは **HECMW\_LOG\_INFO** である。そのため、**HECMW\_LOG\_DEBUG** レベルのログはデフォルトでは出力されない。また、特殊なログレベル **HECMW\_LOG\_NONE** を指定すると、全てのログ出力を抑制できる。出力レベルは動的に変更可能である。

ログの出力先が全く指定されていない場合、標準エラー出力へ送られる。この場合、出力されるログレベルは、ログ出力ルーチンのログレベル設定によって決まる。また、ログファイルに対するロックは行わないため、同一ログファ

イルに同時に書き込みが行われた場合、その動作は不定である。

ログの出力形式は、

```
month day hh:mm:ss loglv: message
```

となる。

注意事項として、現状のログ操作関数の実装では、並列環境における排他制御を行っていないため、同一ログファイルに複数プロセスが同時アクセスした場合の結果は不定である。

日付:

2004年2月16日

作者:

坂根 一彰

---

## マクロ定義

**#define HECMW\_LOG\_MAX 10**

指定可能なログファイルの上限

**#define HECMW\_LOG\_NONE 0**

ログレベルを指定しない

**#define HECMW\_LOG\_ERROR 1**

エラーを示すログレベル

**#define HECMW\_LOG\_WARN 2**

警告を示すログレベル

**#define HECMW\_LOG\_INFO 4**

情報を示すログレベル

**#define HECMW\_LOG\_DEBUG 8**

デバッグを示すログレベル

**#define**

**HECMW\_LOG\_ALL (HECMW\_LOG\_ERROR|HECMW\_LOG\_WARN|HECMW\_LOG  
\_INFO|HECMW\_LOG\_DEBUG)**

全てのログレベルを包含する

**#define HECMW\_LOG\_PERROR 1**

標準エラー出力に出力する

**#define HECMW\_LOG\_OPTALL (HECMW\_LOG\_PERROR)**

全てのオプションを包含する



## 関数

**int HECMW\_openlog (const char \* *logfile*, int *loglv*, int *options*)**

ログファイルを開く

### 引数:

*logfile* ログファイル名

*loglv* このログファイルに対して出力を許可するログレベルの論理和

*options* オプション

### 戻り値:

成功すれば0, 失敗すれば-1を返す.

**int HECMW\_closelog (const char \* *logfile*)**

ログファイルを閉じる

指定されたログファイルを閉じる.

### 引数:

*logfile* ログファイル名

### 戻り値:

成功すれば0, 失敗すれば-1を返す.

**int HECMW\_vlog (int *loglv*, const char \* *fmt*, va\_list *ap*)**

ログを出力する

ログファイルがオープンされていない場合, 標準エラー出力に出力される.

**引数:**

*loglv* このメッセージのログレベル

*fmt* フォーマット

*ap* 可変引数リスト

**戻り値:**

成功すれば0, 失敗すれば-1を返す.

**int HECMW\_log (int *loglv*, const char \* *fmt*, ...)**

ログを出力する

ログファイルがオープンされていない場合, 標準エラー出力に出力される.

**引数:**

*loglv* このメッセージのログレベル

*fmt* フォーマット

... 可変引数

**戻り値:**

成功すれば0, 失敗すれば-1を返す.

**void HECMW\_setloglv (int *loglv*)**

出力ログレベルの指定

引数で指定されたレベルを持つログのみが出力対象となる. `HECMW_LOG_NONE`を指定すると, すべてのログ出力を抑制できる. なお, デフォルトで許可されているログレベルは以下のとおりである.

- `HECMW_LOG_ERROR`
- `HECMW_LOG_WARN`
- `HECMW_LOG_INFO`

**引数:**

*loglv* 出力を許可するログレベルの論理和

## hecmw\_malloc.h

メモリリーク検出ライブラリ

```
#include <stdlib.h>
```

```
#include <string.h>
```

### マクロ定義

- #define **HECMW\_malloc**(size) malloc(size)
- #define **HECMW\_calloc**(nmemb, size) calloc(nmemb, size)
- #define **HECMW\_realloc**(ptr, size) realloc(ptr, size)
- #define **HECMW\_strdup**(s) strdup(s)
- #define **HECMW\_free**(ptr) free(ptr)

### 関数

- void \* **HECMW\_malloc\_** (size\_t size, char \*file, int line)  
*malloc() のラップ関数*
- void \* **HECMW\_calloc\_** (size\_t nmemb, size\_t size, char \*file, int line)  
*calloc() のラップ関数*
- void \* **HECMW\_realloc\_** (void \*ptr, size\_t size, char \*file, int line)  
*realloc() のラップ関数*
- char \* **HECMW\_strdup\_** (const char \*s, char \*file, int line)  
*strdup() のラップ関数*
- void **HECMW\_free\_** (void \*ptr, char \*file, int line)  
*free() のラップ関数*

- **int HECMW\_check\_memleak** (void)  
メモリリークをチェックを実行する
  - **long HECMW\_get\_memsizes** (void)  
現在動的に確保されているメモリサイズの合計を返す
  - **void HECMW\_set\_autocheck\_memleak** (int flag)  
呼び出された時点から、自動メモリリークチェックを有効／無効化する
  - **int HECMW\_list\_meminfo** (FILE \*fp)  
現在確保されているメモリの情報をfpに出力する
- 

## 説明

メモリリーク検出ライブラリ

機能概要

デバッグ時におけるメモリ領域に関する情報を監視することによりメモリリークの検出を可能にする.

そのため、ANSI-C 標準ライブラリ関数のラップ関数を用意し、メモリ確保・解放には以下の関数を利用するようにする.

- **HECMW\_malloc**()
- **HECMW\_calloc**()
- **HECMW\_realloc**()
- **HECMW\_strdup**()
- **HECMW\_free**()

これらのラップ関数は実際はマクロとして実装されており、デバッグシンボルの有無によって、呼び出し関数を変更する. ラップ関数が呼び出されるのは `hecmw_malloc.h` 読み込み時に、マクロ `DEBUG` が定義されている場合のみであり、それ以外の場合は、ANSI-C 標準ライブラリ関数が呼び出される. これにより、リリース時のパフォーマンス低下を防いでいる.

また、メモリリークチェック関数は、解放し忘れていた領域を検出する。このチェック関数は、デフォルトではプログラム終了時に自動的に実行されるが、これを行わないようにすることもできる。さらに、任意のタイミングでチェックすることも可能である。

---

## マクロ定義

```
#define HECMW_malloc(size) malloc(size)
```

```
#define HECMW_calloc(nmemb, size) calloc(nmemb, size)
```

```
#define HECMW_realloc(ptr, size) realloc(ptr, size)
```

```
#define HECMW_strdup(s) strdup(s)
```

```
#define HECMW_free(ptr) free(ptr)
```

---

## 関数

```
void* HECMW_malloc_ (size_t size, char * file, int line)
```

malloc()のラップ関数

このラップ関数は、マクロ**HECMW\_malloc()**より呼び出されるため、直接呼び出す必要はない。

引数:

*size* 確保するサイズ

*file* この関数の呼び出し位置(ファイル名)

*line* この関数の呼び出し位置(行番号)

#### 戻り値:

成功すれば確保されたメモリ領域へのポインタを返す。失敗すればNULLを返し, `errno` にエラー番号がセットされる。

**void\* HECMW\_calloc\_ (size\_t *nmemb*, size\_t *size*, char \* *file*, int *line*)**

`calloc()`のラップ関数

このラップ関数は, マクロ**HECMW\_calloc()**より呼び出されるため, 直接呼び出す必要はない。

#### 引数:

*nmemb* sizeバイトの要素の個数

*size* 要素1個のサイズ

*file* この関数の呼び出し位置(ファイル名)

*line* この関数の呼び出し位置(行番号)

#### 戻り値:

成功すれば確保されたメモリ領域へのポインタを返す。失敗すればNULLを返し, `errno` にエラー番号がセットされる。

**void\* HECMW\_realloc\_ (void \* *ptr*, size\_t *size*, char \* *file*, int *line*)**

`realloc()`のラップ関数

このラップ関数は, マクロ**HECMW\_realloc()**より呼び出されるため, 直接呼び出す必要はない。

#### 引数:

*ptr* 再配置するメモリ領域へのポインタ  
*size* 確保するサイズ  
*file* この関数の呼び出し位置(ファイル名)  
*line* この関数の呼び出し位置(行番号)

**戻り値:**

成功すれば再配置されたメモリ領域へのポインタを返す。失敗すればNULLを返し、  
`errno`にエラー番号がセットされる。

**`char* HECMW_strdup_ (const char * s, char * file, int line)`**

`strdup()`のラップ関数

このラップ関数は、マクロ**`HECMW_strdup()`**より呼び出されるため、直接呼び出す必要はない。

**引数:**

*s* 複製する文字列へのポインタ  
*file* この関数の呼び出し位置(ファイル名)  
*line* この関数の呼び出し位置(行番号)

**戻り値:**

成功すれば、複製した文字列へのポインタを返す。失敗すればNULLを返し、`errno`にエラー番号がセットされる。

**`void HECMW_free_ (void * ptr, char * file, int line)`**

`free()`のラップ関数

このラップ関数は、マクロ**`HECMW_free()`**より呼び出されるため、直接呼び出す必要はない。

**引数:**



*ptr* 解放するメモリ領域へのポインタ  
*file* この関数の呼び出し位置(ファイル名)  
*line* この関数の呼び出し位置(行番号)

### **int HECMW\_check\_memleak (void)**

メモリリークをチェックを実行する

メモリリークチェックが行われ、メモリリークがあれば標準エラー出力に メッセージを出力する.

**戻り値:**

メモリリーク件数

### **long HECMW\_get\_memsize (void)**

現在動的に確保されているメモリサイズの合計を返す

**戻り値:**

確保されているメモリサイズの合計

### **void HECMW\_set\_autocheck\_memleak (int *flag*)**

呼び出された時点から、自動メモリリークチェックを有効／無効化する

デフォルトで有効になっているプログラム終了時の自動メモリリークチェック を行わないようにすることができる.

**引数:**

*flag* 0で無効, 0以外で有効にする.

**int HECMW\_list\_meminfo (FILE \* *fp*)**

現在確保されているメモリの情報を`fp`に出力する

**引数:**

*fp* 出力先のファイルポインタ. NULLなら標準出力に出力される.

**戻り値:**

現在確保されている件数

## hecmw\_map\_int.h

整数をキーとするマップ

### データ構造

- struct **hecmw\_map\_int\_value**  
キーと値のペアを格納する
- struct **hecmw\_map\_int\_pair**  
キーと内部インデックスのペアを格納する
- struct **hecmw\_map\_int**  
整数をキーとするマップ構造体

### 関数

- int **HECMW\_map\_int\_init** (struct **hecmw\_map\_int** \*map, void (\*free\_fnc)(void \*))  
マップを初期化する
- void **HECMW\_map\_int\_finalize** (struct **hecmw\_map\_int** \*map)  
マップのメモリ領域を解放する
- int **HECMW\_map\_int\_nval** (struct **hecmw\_map\_int** \*map)  
データの個数を取得する
- int **HECMW\_map\_int\_add** (struct **hecmw\_map\_int** \*map, int key, void \*value)  
マップにキーと値のペアを追加する

- **int HECMW\_map\_int\_check\_dup** (struct **hecmw\_map\_int** \*map)  
マップにキーの重複がないか調べる
- **int HECMW\_map\_int\_key2local** (struct **hecmw\_map\_int** \*map, int key)  
指定されたキーに対応する内部インデックスを取得する
- **void \* HECMW\_map\_int\_get** (struct **hecmw\_map\_int** \*map, int key)  
指定されたキーに対応するデータを取得する
- **void HECMW\_map\_int\_iter\_init** (struct **hecmw\_map\_int** \*map)  
連続してデータを取り出す際の初期化
- **int HECMW\_map\_int\_iter\_next** (struct **hecmw\_map\_int** \*map, int \*key, void \*\*value)  
連続してデータを取り出す際の次のデータの取り出し
- **int HECMW\_map\_int\_mark\_init** (struct **hecmw\_map\_int** \*map)  
データのマーキングのための初期化
- **int HECMW\_map\_int\_mark** (struct **hecmw\_map\_int** \*map, int key)  
指定したキーに対応するデータをマークする
- **int HECMW\_map\_int\_iter\_next\_unmarked** (struct **hecmw\_map\_int** \*map, int \*key, void \*\*value)  
連続してデータを取り出す際の次のマークされていないデータの取り出し
- **int HECMW\_map\_int\_del\_unmarked** (struct **hecmw\_map\_int** \*map)  
マークされていないデータすべてを削除・メモリ開放する

---

## 説明

整数をキーとするマップ

日付:

2007年11月22日

作者:

後藤 和哉

---

## 関数

**int HECMW\_map\_int\_init (struct hecmw\_map\_int \*map, void (\*free\_fnc)(void \*))**

マップを初期化する

引数:

*map* マップ

*free\_fnc* データ開放用関数へのポインタ

戻り値:

常に1を返す.

**void HECMW\_map\_int\_finalize (struct hecmw\_map\_int \*map)**

マップのメモリ領域を解放する

引数:

*map* マップ

**int HECMW\_map\_int\_nval (struct hecmw\_map\_int \*map)**

データの個数を取得する

引数:

*map* マップ

戻り値:

データの個数を返す.

**int HECMW\_map\_int\_add (struct hecmw\_map\_int \*map, int key, void \*value)**

マップにキーと値のペアを追加する

引数:

*map* マップ

*key* キー

*value* 値

戻り値:

成功すれば1を返す. 失敗すれば0を返す.

**int HECMW\_map\_int\_check\_dup (struct hecmw\_map\_int \*map)**

マップにキーの重複がないか調べる

引数:

*map* マップ

戻り値:

重複したデータの個数を返す.

**int HECMW\_map\_int\_key2local (struct hecmw\_map\_int \*map, int key)**

指定されたキーに対応する内部インデックスを取得する

引数:

*map* マップ

*key* キー

戻り値:

キーに対応するデータが見つければ、その内部インデックスを返す。見つからなければ-1を返す。

**void \* HECMW\_map\_int\_get (struct hecmw\_map\_int \*map, int key)**

指定されたキーに対応するデータを取得する

引数:

*map* マップ

*key* キー

戻り値:

キーに対応するデータが見つければ、その値を返す。見つからなければNULLを返す。

**void HECMW\_map\_int\_iter\_init (struct hecmw\_map\_int \*map)**

連続してデータを取り出す際の初期化

引数:

*map* マップ

**int HECMW\_map\_int\_iter\_next (struct hecmw\_map\_int \*map, int \*key, void \*\*value)**

連続してデータを取り出す際の次のデータの取り出し

引数:

*map* マップ

*key* キー

*value* 値

戻り値:

次のデータがある場合、*key*と*value*にそれぞれキーと値をセットし、1を返す。 次のデータがない場合、0を返す。

**int HECMW\_map\_int\_mark\_init (struct hecmw\_map\_int \*map)**

データのマーキングのための初期化

引数:

*map* マップ

戻り値:

成功すれば1を返す。 失敗すれば0を返す。

**int HECMW\_map\_int\_mark (struct hecmw\_map\_int \*map, int key)**

指定したキーに対応するデータをマークする



引数:

*map* マップ

*key* キー

戻り値:

成功すれば1を返す。 キーに対応するデータが見つからず、失敗すれば0を返す。

**int HECMW\_map\_int\_iter\_next\_unmarked (struct hecmw\_map\_int \*map, int \*key, void \*\*value)**

連続してデータを取り出す際の次のマークされていないデータの取り出し

引数:

*map* マップ

*key* キー

*value* 値

戻り値:

次のデータがある場合、*key*と*value*にそれぞれキーと値をセットし、1を返す。 次のデータがない場合、0を返す。

**int HECMW\_map\_int\_del\_unmarked (struct hecmw\_map\_int \*map)**

マークされていないデータすべてを削除・メモリ開放する

引数:

*map* マップ

戻り値:

削除されたデータの個数を返す。

## hecmw\_msg.h

HEC-MWメッセージ情報ライブラリ.

```
#include "hecmw_msgno.h"
```

### データ構造

- **struct hecmw\_msgent**  
*HEC-MWメッセージ情報構造体*

### 関数

- **char \* HECMW\_strmsg (int msgno)**  
*与えられたメッセージ番号に対応するメッセージ文字列を返す*
- **int HECMW\_is\_syserr (int msgno)**  
*与えられたメッセージ番号がシステムエラー番号か否かを返す*

### 変数

- **hecmw\_msgent hecmw\_msg\_table []**  
*HEC-MWメッセージ情報を格納したテーブル.*

---

### 説明

HEC-MW メッセージ情報ライブラリ.

HEC-MW において取り扱うメッセージは、メッセージ番号と、 それに対応す

るメッセージ文字列によって定義する事ができる。  
このライブラリでは、容易にメッセージ情報を取得できる関数を提供する。

日付:

2004年2月16日

作者:

坂根 一彰

---

## 関数

### **char\* HECMW\_strmsg (int *msgno*)**

与えられたメッセージ番号に対応するメッセージ文字列を返す

引数:

*msgno* メッセージ番号

戻り値:

*msgno*に対応するメッセージ文字列

### **int HECMW\_is\_syserr (int *msgno*)**

与えられたメッセージ番号がシステムエラー番号か否かを返す

引数:

*msgno* メッセージ番号

戻り値:

*msgno*がシステムエラー番号なら1, そうでなければ0

---

## 変数

**struct hecmw\_msgent hecmw\_msg\_table[]**

HEC-MWメッセージ情報を格納したテーブル.

## hecmw\_path.h

パス名に関する処理を行うユーティリティ

### 関数

- **int HECMW\_get\_path\_separator** (void)  
システムのパス区切り文字を返す
- **int HECMW\_is\_absolute\_path** (const char \*path)  
パス名が絶対パスか否かを返す
- **char \* HECMW\_dirname** (const char \*path)  
パス名からディレクトリ名を取り出す
- **char \* HECMW\_basename** (const char \*path)  
パス名からディレクトリ名を削除する

---

### 説明

パス名に関する処理を行うユーティリティ

日付:

2004年2月16日

作者:

坂根 一彰

---

## 関数

### **int HECMW\_get\_path\_separator (void)**

システムのパス区切り文字を返す

戻り値:

パス区切り文字

### **int HECMW\_is\_absolute\_path (const char \* *path*)**

パス名が絶対パスか否かを返す

引数:

*path* パス名

戻り値:

絶対パスなら1を返し、そうでなければ0を返す

### **char\* HECMW\_dirname (const char \* *path*)**

パス名からディレクトリ名を取り出す

引数:

*path* パス名

戻り値:

ディレクトリ名

**char\* HECMW\_basename (const char \* *path*)**

パス名からディレクトリ名を削除する

**引数:**

*path* パス名

**戻り値:**

ディレクトリ名を削除した部分

## hecmw\_reorder.h

メッシュ情報の並べ替え実装

```
#include "hecmw_struct.h"
```

### 関数

- `int HECMW_reorder_node_mpc (struct hecmwST_local_mesh *local_mesh)`
  - `int HECMW_reorder_node_dof (struct hecmwST_local_mesh *local_mesh)`
  - `int HECMW_reorder_elem_type (struct hecmwST_local_mesh *local_mesh)`
  - `int HECMW_reorder (struct hecmwST_local_mesh *local_mesh)`
- 

### 説明

メッシュ情報の並べ替え実装

日付:

2004年2月16日

作者:

坂根 一彰

---

### 関数

`int HECMW_reorder_node_mpc (struct hecmwST_local_mesh * local_mesh)`

`int HECMW_reorder_node_dof (struct hecmwST_local_mesh * local_mesh)`

`int HECMW_reorder_elem_type (struct hecmwST_local_mesh * local_mesh)`



```
int HECMW_reorder (struct hecmwST_local_mesh * local_mesh)
```

## hecmw\_restart.h

リスタートデータの入出力を行う

```
#include <stdio.h>
```

### 関数

- **int HECMW\_restart\_open\_by\_name** (char \*name\_ID)  
リスタートファイルを読み込み用にオープンする
- **int HECMW\_restart\_open** (void)  
リスタートファイルを読み込み用にオープンする
- **int HECMW\_restart\_close** (void)  
リスタートファイルをクローズする
- **void \* HECMW\_restart\_read** (void \*addr)  
リスタートファイルからリスタートデータを取得する
- **int HECMW\_restart\_add** (void \*data, size\_t size)  
リスタートファイルに出力するデータを登録する(データ登録処理)
- **int HECMW\_restart\_add\_int** (int \*data, int n\_data)  
リスタートファイルに出力するデータを登録する(データ登録処理)
- **int HECMW\_restart\_add\_double** (double \*data, int n\_data)  
リスタートファイルに出力するデータを登録する(データ登録処理)
- **int HECMW\_restart\_write\_by\_name** (char \*name\_ID)  
リスタートデータを出力する

- `int HECMW_restart_write (void)`

リスタートデータを出力する

---

## 説明

リスタートデータの入出力を行う

リスタートデータは、HEC-MW が提供する API を通じて入出力することが可能である。

リスタートデータ入出力ルーチンでは、リスタートデータのデータ構造を定めていない。連続したひと固まりの領域であれば、それをリスタートデータとして扱うことができる。リスタートデータ全体は、そのような連続したデータの集合である。これらの連続したデータの意味が何であるかは、利用者が把握しておく必要がある。

### リスタートデータの出力方法

リスタートデータを出力するには、まず出力するデータを出力ルーチンに登録する。出力したいデータが複数ある場合は、全てのデータに対して登録を繰り返す。この時点では、まだファイルへの出力は行われず、出力データへの領域を記憶するだけである。したがって、実際に出力が終了するまで登録したデータ領域を変更してはならない。次に示す関数が、登録を行う関数である。

- `HECMW_restart_add()`
- `HECMW_restart_add_int()`
- `HECMW_restart_add_double()`

全てのデータを登録し終えたら、ファイルへの出力を行う。この時、データ登録を行った順に、そらのデータがファイルへ出力される。

- `HECMW_restart_write()`
- `HECMW_restart_write_by_name()`

これで、リスタートファイルへの出力が完了する。

## リスタートデータの入力

リスタートデータを入力するには、まずリスタートファイルをオープンする。

- **HECMW\_restart\_open()**
- **HECMW\_restart\_open\_by\_name()**

次に、データの入力を行う。データの入力は、登録したデータ単位で行われる。したがって、リスタートファイルの全データを取得するには、登録した回数と同じだけ入力を行う必要がある。この時、登録時と同じ順序でデータが入力され、そのデータは登録された時のデータと等しくなる。

- **HECMW\_restart\_read()**

必要なデータを取得し終わったら、ファイルをクローズして完了する。

-HECMW\_restart\_close()

日付:

2004年2月16日

作者:

坂根 一彰

---

## 関数

### **int HECMW\_restart\_open\_by\_name (char \* *name\_ID*)**

リスタートファイルを読み込み用にオープンする

*name\_ID*を持つ!RESTARTで定義されるリスタートファイルをリスタートデータ読み込み用にオープンする。この時、IOパラメータは無視される。オープンしたリスタートファイルは、HECMW\_restart\_close()によってクローズしなければならない。

引数:

*name\_ID* リスタートファイル識別子

**戻り値:**

成功すれば0を返す。失敗すれば-1を返し、HECMW\_set\_error()によってエラー情報がセットされる。

**int HECMW\_restart\_open (void)**

リスタートファイルを読み込み用にオープンする

オープンされるファイルは、全体制御ファイルの!RESTARTから自動検索される。検索対象となるのは、IO=INまたはIO=INOUTと定義されている!RESTARTである。それらのうち、全体制御ファイルの先頭から最初に定義されているものが使用される。

オープンしたリスタートファイルは、HECMW\_restart\_close()によってクローズしなければならない。

**戻り値:**

成功すれば0を返す。失敗すれば-1を返し、HECMW\_set\_error()によってエラー情報がセットされる。

**int HECMW\_restart\_close (void)**

リスタートファイルをクローズする

既にオープンされているリスタートファイルをクローズする。

**戻り値:**

成功すれば0を返す。失敗すれば-1を返し、HECMW\_set\_error()によってエラー情報がセットされる。

**参照:**

HECMW\_restart\_open()

HECMW\_restart\_open\_by\_name()

## **void\* HECMW\_restart\_read (void \* *addr*)**

リスタートファイルからリスタートデータを取得する

リスタートファイル内の部分データが読み込まれ、*addr*に格納される。 引数*addr*にデータを格納するためには、その呼び出しで読み込まれるデータのサイズを事前に計算し、十分なメモリ領域を確保した上で、*addr*がそれをさすようにしておく必要がある。 一度の呼び出しで取得するデータサイズはリスタートデータに依存するため、何回目の呼び出しでどのデータが読み込まれるかを把握しておくのはユーザの責任である。 ただし、*addr*にNULLを渡すと入力ルーチンがデータ入力時に自動的に適切なデータサイズを取得し、データ格納用にメモリ領域を動的確保するため、データサイズの心配はしなくてもよい。

### **引数:**

*addr* リスタートデータ格納先。 NULLを指定すると動的に確保される。

### **戻り値:**

成功すれば、リスタートデータが格納された領域へのポインタを返す。 失敗すれば-1を返し、HECMW\_set\_error()によってエラー情報がセットされる。

### **参照:**

HECMW\_restart\_open()  
HECMW\_restart\_open\_by\_name()  
HECMW\_restart\_add()  
HECMW\_restart\_add\_int()  
HECMW\_restart\_add\_double()

## **int HECMW\_restart\_add (void \* *data*, size\_t *size*)**

リスタートファイルに出力するデータを登録する(データ登録処理)

汎用データ型の出力インタフェース。 *data*から始まる*size*バイトをリスタートデータとして登録する。 この関数の呼び出し時点ではリスタートデータとして出力することを登録しただけであるため、実際には出力が行われるわけではない。 そのため、HECMW\_restart\_write()

またはHECMW\_restart\_write\_by\_name()によって、 ファイルへの出力が行われるまで、 data が指す領域を変更してはならない。

**引数:**

*data* リスタートデータ

*size* リスタートデータのサイズ(バイト)

**戻り値:**

成功すれば0を返す。 失敗すれば-1を返し、HECMW\_set\_error()によってエラー情報がセットされる。

**int HECMW\_restart\_add\_int (int \* *data*, int *n\_data*)**

リスタートファイルに出力するデータを登録する(データ登録処理)

int型の配列に特化した出力インタフェース。 この呼び出しは、HECMW\_restart\_add(data, sizeof(int)\*n\_data)と等価である。

**引数:**

*data* リスタートデータ

*n\_data* dataに含まれるデータの個数

**戻り値:**

成功すれば0を返す。 失敗すれば-1を返し、HECMW\_set\_error()によってエラー情報がセットされる。

**int HECMW\_restart\_add\_double (double \* *data*, int *n\_data*)**

リスタートファイルに出力するデータを登録する(データ登録処理)

double型の配列に特化した出力インタフェース。 この呼び出しは、HECMW\_restart\_add(data, sizeof(double)\*n\_data)と等価である。

**引数:**

*data* リスタートデータ

*n\_data* *data*に含まれるデータの個数

**戻り値:**

成功すれば0を返す。失敗すれば-1を返し、HECMW\_set\_error()によってエラー情報がセットされる。

**int HECMW\_restart\_write\_by\_name (char \* *name\_ID*)**

リスタートデータを出力する

HECMW\_restart\_add(),HECMW\_restart\_add\_int(),HECMW\_restart\_add\_double() で登録処理されたリスタートデータをリスタートファイルに出力する。出力されるファイルは、!RESTARTのNAMEが*name\_ID*のものである。出力されるファイルのファイル名は、全体制御ファイルから取得したファイル名の末尾に「.<ランク番号>」を付加したものとなる。

**引数:**

*name\_ID* リスタートファイル識別子

**戻り値:**

成功すれば0を返す。失敗すれば-1を返し、HECMW\_set\_error()によってエラー情報がセットされる。

**int HECMW\_restart\_write (void)**

リスタートデータを出力する

HECMW\_restart\_add(),HECMW\_restart\_add\_int(),HECMW\_restart\_add\_double() で登録処理されたリスタートデータをリスタートファイルに出力する。出力されるファイルは、全体制御ファイルの!RESTARTから自動検索される。検索対象となるのは、IO=OUTまたはIO=INOUTと定義されている!RESTARTである。それらのうち、全体制御ファイルの先頭か



ら最初に定義されているものが使用される。出力されるファイルのファイル名は、全体制御ファイルから取得したファイル名の末尾に「.<ランク番号>」を付加したものとなる。

**戻り値:**

成功すれば0を返す。失敗すれば-1を返し、HECMW\_set\_error()によってエラー情報がセットされる。

## hecmw\_result.h

結果データ 入出力

### データ構造

- **struct hecmwST\_result\_data**  
結果データ構造体

### 関数

- **int HECMW\_result\_init** (int n\_node, int n\_elem, int step, char \*header)  
結果データ出力の初期化を行う
- **int HECMW\_result\_finalize** (void)  
結果データ出力の後始末を行う
- **int HECMW\_result\_add** (int node\_or\_elem, int n\_dof, char \*label, double \*ptr)  
出力結果データを登録する
- **int HECMW\_result\_write** (void)  
結果データを結果ファイルに出力する
- **int HECMW\_result\_write\_by\_name** (char \*name\_ID)  
結果データを結果ファイルに出力する
- **int HECMW\_result\_write\_by\_fname** (char \*filename)  
結果データを結果ファイルに出力する

- **hecmwST\_result\_data \* HECMW\_result\_read\_by\_name** (char \*name\_ID, int tstep)  
結果ファイルから結果データを入力する
- **hecmwST\_result\_data \* HECMW\_result\_read** (int tstep)  
結果ファイルから結果データを入力する
- **hecmwST\_result\_data \* HECMW\_result\_read\_by\_fname** (char \*filename)  
結果ファイルから結果データを入力する
- **void HECMW\_result\_free** (struct hecmwST\_result\_data \*result)  
結果ファイル構造体のメモリ領域を解放する
- **int HECMW\_result\_get\_nnode** (void)  
*Fortran* インタフェースが節点数取得のために呼び出す。それ以外は使用しない。 .
- **int HECMW\_result\_get\_nelem** (void)  
*Fortran* インタフェースが要素数取得のために呼び出す。それ以外は使用しない。 .

---

## 説明

結果データ 入出力

日付:

2004年2月16日

作者:

坂根 一彰

---

## 関数

### **int HECMW\_result\_init (int *n\_node*, int *n\_elem*, int *step*, char \* *header*)**

結果データ出力の初期化を行う

結果データ出力に必要な情報を取得する。ただし、*header*はファイルのコメントとして使用されるだけで、任意の文字列を指定してよい。

#### **引数:**

*n\_node* 節点数

*n\_elem* 要素数

*step* タイムステップ

*header* ファイルヘッダ

#### **戻り値:**

成功すれば0を返す。失敗すれば-1を返し、HECMW\_set\_error()によってエラー情報がセットされる。

### **int HECMW\_result\_finalize (void)**

結果データ出力の後始末を行う

#### **戻り値:**

成功すれば0を返す。失敗すれば-1を返し、HECMW\_set\_error()によってエラー情報がセットされる。

### **int HECMW\_result\_add (int *node\_or\_elem*, int *n\_dof*, char \* *label*, double \* *ptr*)**

出力結果データを登録する

出力する結果データを出力ルーチンに伝える。この時点ではまだファイルに出力されていない。出力が完了するまで、データを変更してはならない。

#### **引数:**

*node\_or\_elem* 指定する値が節点なのか要素なのかを示す(1: 節点, 2: 要素)

*n\_dof* 自由度数

*label* コンポーネントラベル

*ptr* 結果データ

#### 戻り値:

成功すれば0を返す。失敗すれば-1を返し、HECMW\_set\_error()によってエラー情報がセットされる。

### int HECMW\_result\_write (void)

結果データを結果ファイルに出力する

出力されるデータは、HECMW\_result\_add()によって登録されたデータである。出力されるファイルは、全体制御ファイルの!RESULTから自動検索される。対象となるファイルは、IO=OUTの!RESULTのうち、全体制御ファイルの先頭から最初に定義されているものになる。出力されるファイルのファイル名は、全体制御ファイルから取得したファイル名の末尾に「.<ランク番号>.<tstep>」を付加したものとなる。

#### 戻り値:

成功すれば0を返す。失敗すれば-1を返し、HECMW\_set\_error()によってエラー情報がセットされる。

### int HECMW\_result\_write\_by\_name (char \* *name\_ID*)

結果データを結果ファイルに出力する

出力されるデータは、HECMW\_result\_add()によって登録されたデータである。出力されるファイルは、全体制御ファイルの!RESULTのNAMEが*name\_ID*のものとなる。この場合、IOパラメータは無視される。出力されるファイルのファイル名は、全体制御ファイルから取得したファイル名の末尾に「.<ランク番号>.<tstep>」を付加したものとなる。

#### 引数:

*name\_ID* 結果ファイル識別子

**戻り値:**

成功すれば0を返す。失敗すれば-1を返し、HECMW\_set\_error()によってエラー情報がセットされる。

**int HECMW\_result\_write\_by\_fname (char \* *filename*)**

結果データを結果ファイルに出力する

出力されるデータは、HECMW\_result\_add()によって登録されたデータである。出力されるファイルは、*filename*で指定されたものとなる。

**引数:**

*filename* 結果ファイル名

**戻り値:**

成功すれば0を返す。失敗すれば-1を返し、HECMW\_set\_error()によってエラー情報がセットされる。

**struct hecmwST\_result\_data\* HECMW\_result\_read\_by\_name (char \* *name\_ID*, int *tstep*)**

結果ファイルから結果データを入力する

結果ファイル内のデータを読み込み、結果データ構造体に格納して返す。入力されるファイルは、全体制御ファイルの!RESULTのNAMEが*name\_ID*のものとなる。この場合、IOパラメータは無視される。ファイル名は、全体制御ファイルから取得したファイル名の末尾に、「<ランク番号>.<tstep>」を付加したものとなる。

**引数:**

*name\_ID* 結果ファイル識別子

*tstep* タイムステップ

**戻り値:**

成功すれば結果データ構造体を返す。失敗すればNULLを返し、HECMW\_set\_error()によってエラー情報がセットされる。

**struct hecmwST\_result\_data\* HECMW\_result\_read (int *tstep*)**

結果ファイルから結果データを入力する

結果ファイル内のデータを読み込み、結果データ構造体に格納して返す。入力されるファイルは、全体制御ファイルの!RESULTから自動検索される。対象となるファイルは、IO=INの!RESULTのうち、全体制御ファイルの先頭から最初に定義されているものになる。ファイル名は、全体制御ファイルから取得したファイル名の末尾に、「.<ランク番号>.<tstep>」を付加したものとなる。

**引数:**

*tstep* タイムステップ

**戻り値:**

成功すれば結果データ構造体を返す。失敗すればNULLを返し、HECMW\_set\_error()によってエラー情報がセットされる。

**struct hecmwST\_result\_data\* HECMW\_result\_read\_by\_fname (char \* *filename*)**

結果ファイルから結果データを入力する

結果ファイル内のデータを読み込み、結果データ構造体に格納して返す。入力されるファイルは、*filename*で指定されたものとなる。

**戻り値:**

成功すれば結果データ構造体を返す。失敗すればNULLを返し、HECMW\_set\_error()によってエラー情報がセットされる。

**void HECMW\_result\_free (struct hecmwST\_result\_data \* *result*)**

結果ファイル構造体のメモリ領域を解放する

**引数:**

*result* 結果データ構造体

**int HECMW\_result\_get\_nnode (void)**

Fortranインタフェースが節点数取得のために呼び出す。それ以外は使用しない。 .

**戻り値:**

節点数

**int HECMW\_result\_get\_nelem (void)**

Fortranインタフェースが要素数取得のために呼び出す。それ以外は使用しない。 .

**戻り値:**

要素数



## hecmw\_result\_copy\_c2f.h

CからFortranへ結果データのコピーを行う.

```
#include "hecmw_result.h"
```

### 関数

- `int HECMW_result_copy_c2f_init (struct hecmwST_result_data *result_data, int nnode, int nelem)`  
コピー元の結果データ構造体をセットする
- `int HECMW_result_copy_c2f_finalize (void)`  
コピールーチン終了処理

---

### 説明

C から Fortran へ結果データのコピーを行う.

初期化処理によってセットされた結果データ構造体を C から Fortran へコピーする. 初期化処理と終了処理の間に, Fortran からコピー関数を呼ぶことによってコピーを行う. スカラーと文字列以外は, 実際にはコピーではなく, C から Fortran のメモリ領域をポインタで指しているだけである.

日付:

2004年2月16日

作者:

坂根 一彰

---

### 関数

**int HECMW\_result\_copy\_c2f\_init (struct hecmwST\_result\_data \* *result\_data*, int *nnode*, int *nelem*)**

コピー元の結果データ構造体をセットする

**引数:**

*result\_data* コピー元の結果データ構造体

*nnode* 節点数

*nelem* 要素数

**戻り値:**

常に0を返す.

**int HECMW\_result\_copy\_c2f\_finalize (void)**

コピールーチン終了処理

コピー元の結果データ構造体へのポインタをクリアする.

**戻り値:**

常に0を返す.

## hecmw\_result\_copy\_f2c.h

FortranからCへ結果データのコピーを行う.

```
#include "hecmw_result.h"
```

### 関数

- `int HECMW_result_copy_f2c_init (struct hecmwST_result_data *result_data)`  
コピーを格納する結果データ構造体をセットする
- `int HECMW_result_copy_f2c_finalize (void)`  
コピールーチン終了処理

---

### 説明

Fortran から C へ結果データのコピーを行う.

初期化処理によってセットされた結果データ構造体に Fortran からのコピーを格納する. 初期化処理と終了処理の間に, Fortran からコピー関数を呼ぶことによってコピーを行う.

日付:

2004年2月16日

作者:

坂根 一彰

---

### 関数

`int HECMW_result_copy_f2c_init (struct hecmwST_result_data * result_data)`

コピーを格納する結果データ構造体をセットする

`result_data`のメンバ領域は、コピー時に割り当てられる。

引数:

*result\_data* コピー格納先の結果データ構造体

### **int HECMW\_result\_copy\_f2c\_finalize (void)**

コピールーチン終了処理

コピー先の結果データ構造体へのポインタをクリアする。

## hecmw\_set\_int.h

整数の集合

### データ構造

- struct **hecmw\_set\_int**  
整数の集合構造体

### 関数

- int **HECMW\_set\_int\_init** (struct **hecmw\_set\_int** \*set)  
集合を初期化する
- void **HECMW\_set\_int\_finalize** (struct **hecmw\_set\_int** \*set)  
集合のメモリ領域を解放する
- int **HECMW\_set\_int\_nval** (struct **hecmw\_set\_int** \*set)  
値の個数を取得する
- int **HECMW\_set\_int\_add** (struct **hecmw\_set\_int** \*set, int value)  
集合に値を追加する
- int **HECMW\_set\_int\_check\_dup** (struct **hecmw\_set\_int** \*set)  
値に重複がないか調べる
- int **HECMW\_set\_int\_del** (struct **hecmw\_set\_int** \*set, int value)  
値を集合から削除する

- **void HECMW\_set\_int\_iter\_init** (struct hecmw\_set\_int \*set)  
連続して値を取り出す際の初期化
  - **int HECMW\_set\_int\_iter\_next** (struct hecmw\_set\_int \*set, int \*value)  
連続して値を取り出す際の次の値の取り出し
- 

## 説明

整数の集合

日付:

2007年11月22日

作者:

後藤 和哉

---

## 関数

**int HECMW\_set\_int\_init** (struct hecmw\_set\_int \*set)

集合を初期化する

引数:

*set* 集合

戻り値:

常に1を返す.

**void HECMW\_set\_int\_finalize** (struct hecmw\_set\_int \*set)

集合のメモリ領域を解放する

引数:

*set* 集合

**int HECMW\_set\_int\_nval (struct hecmw\_set\_int \*set)**

値の個数を取得する

引数:

*set* 集合

戻り値:

値の個数を返す.

**int HECMW\_set\_int\_add (struct hecmw\_set\_int \*set, int value)**

集合に値を追加する

引数:

*set* 集合

*value* 値

戻り値:

成功すれば1を返す. 失敗すれば0を返す.

**int HECMW\_set\_int\_check\_dup (struct hecmw\_set\_int \*set)**

値に重複がないか調べる

引数:

*set* 集合

戻り値:

重複したデータの個数を返す.

**int HECMW\_set\_int\_del (struct hecmw\_set\_int \*set, int value)**

値を集合から削除する

引数:

*set* 集合

*value* 値

戻り値:

成功すれば1を返す. 値が存在せず, 失敗すれば0を返す.

**void HECMW\_set\_int\_iter\_init (struct hecmw\_set\_int \*set)**

連続して値を取り出す際の初期化

引数:

*set* 集合

**int HECMW\_set\_int\_iter\_next (struct hecmw\_set\_int \*set, int \*value)**

連続して値を取り出す際の次の値の取り出し



**引数:**

*set* 集合

*value* 値

**戻り値:**

次のデータがあれば, **value**に値をセットし1を返す. 次のデータがなければ0を返す.

## hecmw\_struct.h

メッシュデータ構造体定義

```
#include "hecmw_util.h"
```

### データ構造

- struct **hecmwST\_section**  
セクション情報構造体
- struct **hecmwST\_material**  
材料情報構造体
- struct **hecmwST\_mpc**  
拘束グループ情報構造体
- struct **hecmwST\_amplitude**  
AMPLITUDE情報構造体
- struct **hecmwST\_node\_grp**  
節点グループ情報構造体
- struct **hecmwST\_elem\_grp**  
要素グループ情報構造体
- struct **hecmwST\_surf\_grp**  
面グループ情報構造体
- struct **hecmwST\_local\_mesh**  
メッシュデータ構造体

## マクロ定義

- #define **HECMW\_SECT\_TYPE\_SOLID** 1
- #define **HECMW\_SECT\_TYPE\_SHELL** 2
- #define **HECMW\_SECT\_TYPE\_BEAM** 3
- #define **HECMW\_SECT\_TYPE\_INTERFACE** 4
- #define **HECMW\_SECT\_OPT\_PSTRESS** 0

セクションオプション.

- #define **HECMW\_SECT\_OPT\_PSTRAIN** 1
- #define **HECMW\_SECT\_OPT\_ASYMMETRY** 2
- #define **HECMW\_SECT\_OPT\_PSTRESS\_RI** 10
- #define **HECMW\_SECT\_OPT\_PSTRAIN\_RI** 11
- #define **HECMW\_SECT\_OPT\_ASYMMETRY\_RI** 12
- #define **HECMW\_AMP\_TYPEDEF\_TABULAR** 1
- #define **HECMW\_AMP\_TYPETIME\_STEP** 1
- #define **HECMW\_AMP\_TYPEVAL\_RELATIVE** 1
- #define **HECMW\_AMP\_TYPEVAL\_ABSOLUTE** 2
- #define **HECMW\_BCGRPTYPE\_DISPACEMENT** 1
- #define **HECMW\_BCGRPTYPE\_FLUX** 2
- #define **HECMW\_FLAG\_PARTTYPE\_UNKNOWN** 0
- #define **HECMW\_FLAG\_PARTTYPE\_NODEBASED** 1
- #define **HECMW\_FLAG\_PARTTYPE\_ELEMBASED** 2

---

## 説明

メッシュデータ構造体定義

日付:

2004年2月16日

作者:

## マクロ定義

**#define HECMW\_SECT\_TYPE\_SOLID 1**

**#define HECMW\_SECT\_TYPE\_SHELL 2**

**#define HECMW\_SECT\_TYPE\_BEAM 3**

**#define HECMW\_SECT\_TYPE\_INTERFACE 4**

**#define HECMW\_SECT\_OPT\_PSTRESS 0**

セクションオプション.

サイズ : n\_sect

- 0: 指定無し, 平面圧力
- 1: 平面歪
- 2: 軸対象
- 10: 0+次数低減積分

- 11: 1+次数低減積分
- 12: 2+次数低減積分

**#define HECMW\_SECT\_OPT\_PSTRAIN 1**

**#define HECMW\_SECT\_OPT\_ASYMMETRY 2**

**#define HECMW\_SECT\_OPT\_PSTRESS\_RI 10**

**#define HECMW\_SECT\_OPT\_PSTRAIN\_RI 11**

**#define HECMW\_SECT\_OPT\_ASYMMETRY\_RI 12**

**#define HECMW\_AMP\_TYPEDEF\_TABULAR 1**

**#define HECMW\_AMP\_TYPETIME\_STEP 1**

**#define HECMW\_AMP\_TYPEVAL\_RELATIVE 1**

**#define HECMW\_AMP\_TYPEVAL\_ABSOLUTE 2**

**#define HECMW\_BCGRPTYPE\_DISPALCEMENT 1**

**#define HECMW\_BCGRPTYPE\_FLUX 2**

**#define HECMW\_FLAG\_PARTTYPE\_UNKNOWN 0**

**#define HECMW\_FLAG\_PARTTYPE\_NODEBASED 1**

**#define HECMW\_FLAG\_PARTTYPE\_ELEMBASED 2**

## hecmw\_system.h

局所座標系から全体座標系への変換を行う

```
#include "hecmw_geometric.h"
```

### データ構造

- struct **hecmw\_system\_param**

*座標変換パラメータ*

### 関数

- int **HECMW\_system** (struct **hecmw\_system\_param** \*param, struct **hecmw\_coord** \*coord, struct **hecmw\_coord** \*result)

*局所座標系から全体座標系への変換を行う(未実装)*

---

### 説明

局所座標系から全体座標系への変換を行う

日付:

2004年2月16日

作者:

坂根 一彰

---

### 関数

```
int HECMW_system (struct hecmw_system_param * param, struct hecmw_coord  
* coord, struct hecmw_coord * result)
```

局所座標系から全体座標系への変換を行う(未実装)

引数:

*param* 座標変換パラメータ

*coord* 変換元の局所座標

*result* 変換後の全体座標



## hecmw\_ucd\_print.h

UCDファイルを出力する.

```
#include "hecmw_struct.h"
```

```
#include "hecmw_result.h"
```

### 関数

- `int HECMW_ucd_print (const struct hecmwST_local_mesh *mesh, const struct hecmwST_result_data *result, const char *ofname)`

---

### 説明

UCD ファイルを出力する.

日付:

2004年2月16日

作者:

坂根 一彰

---

### 関数

```
int HECMW_ucd_print (const struct hecmwST_local_mesh * mesh, const struct  
hecmwST_result_data * result, const char * ofname)
```

## hecmw\_util.h

HEC-MWユーティリティ.

```
#include <stdio.h>
#include <stdlib.h>
#include <assert.h>
#include <stdarg.h>
#include "hecmw_config.h"
#include "hecmw_init.h"
#include "hecmw_finalize.h"
#include "hecmw_malloc.h"
#include "hecmw_log.h"
#include "hecmw_msg.h"
#include "hecmw_lib_fc.h"
#include "hecmw_comm.h"
#include "hecmw_control.h"
#include "hecmw_hash.h"
#include "hecmw_hash_int.h"
#include "hecmw_error.h"
#include "mpi.h"
```

## マクロ定義

- #define **HECMW\_DEBUG**(args) ((void)0)
- #define **HECMW\_assert**(cond) ((void)0)
- #define **HECMW\_check\_condition**(cond, isabort) HECMW\_check\_condition\_( (cond)?1:0, #cond, isabort, \_\_FILE\_\_, \_\_LINE\_\_ );

## 関数

- void **HECMW\_fprintf** (FILE \*fp, char \*fmt,...)  
メッセージを出力する

- void **HECMW\_printerr** (char \*fmt,...)  
メッセージを標準出力に出力する
- char \* **HECMW\_get\_date** (void)  
日付を取得する
- void **HECMW\_assert\_** (int cond, char \*cond\_str, char \*file, int line)  
アサーションを行う
- int **HECMW\_check\_condition\_** (int cond, char \*cond\_str, int isabort, char \*file, int line)  
診断式をチェックする.
- void **HECMW\_abort** (HECMW\_Comm comm)  
プログラムを異常終了させる
- char \* **HECMW\_toupper** (char \*s)  
小文字から大文字への変換を行う
- char \* **HECMW\_tolower** (char \*s)  
大文字から小文字への変換を行う
- void **HECMW\_print\_error** (void)  
エラーメッセージをログに出力する
- void **HECMW\_print\_msg** (int loglv, int msgno, const char \*fmt,...)  
メッセージをログに出力する
- void **HECMW\_print\_vmsg** (int loglv, int msgno, const char \*fmt, va\_list ap)  
メッセージをログに出力する

## 説明

HEC-MW ユーティリティ.  
HEC-MW で使用されるユーティリティ関数.

日付:

2004年2月16日

作者:

坂根 一彰

---

## マクロ定義

```
#define HECMW_DEBUG(args) ((void)0)
```

```
#define HECMW_assert(cond) ((void)0)
```

```
#define HECMW_check_condition(cond,  
isabort) HECMW_check_condition_( (cond)?1:0, #cond, isabort, __FILE__,  
__LINE__ );
```

---

## 関数

```
void HECMW_fprintf (FILE * fp, char * fmt, ...)
```

メッセージを出力する

引数:

*fp* メッセージ出力先ファイルポインタ

*fmt* 可変引数フォーマット

... メッセージの可変引数

**void HECMW\_printerr (char \* *fmt*, ...)**

メッセージを標準出力に出力する

引数:

*fmt* 可変引数フォーマット

... メッセージの可変引数

**char\* HECMW\_get\_date (void)**

日付を取得する

呼び出された時点での日付を取得し、フォーマットして返す。フォーマットされた日付は、静的な領域に格納され、次の呼び出しまで保存される。

戻り値:

日付を示す文字列へのポインタ。日付の取得に失敗すればNULLを返す。

**void HECMW\_assert\_ (int *cond*, char \* *cond\_str*, char \* *file*, int *line*)**

アサーションを行う

診断した結果、*cond*が偽の場合は、エラーメッセージを標準出力に出力し、プログラムを異常終了させる。

この関数は、HECMW\_assertマクロより呼び出される。

**引数:**

*cond* 診断する値  
*cond\_str* 判定条件の文字列  
*file* ファイル名  
*line* 行番号

**int HECMW\_check\_condition\_ (int *cond*, char \* *cond\_str*, int *isabort*, char \* *file*, int *line*)**

診断式をチェックする.

*cond*が真なら0を返す. *cond*が偽の場合は, *isabort*が0なら1を返し, そうでなければ エラーメッセージを標準エラー出力に出力し, プログラムを異常終了させる.

**引数:**

*cond* 判断する値  
*cond\_str* 判定条件の文字列  
*isabort* 異常終了させるかどうかを示すフラグ  
*file* ファイル名  
*line* 行番号

**戻り値:**

*cond*が真なら0を返す. *cond*が偽の場合は, *isabort*が偽の場合のみ1を返す.

**void HECMW\_abort (HECMW\_Comm *comm*)**

プログラムを異常終了させる

**引数:**

*comm* 異常終了の対象となるプロセスを含むMPIコミュニケーター

## **char\* HECMW\_toupper (char \* s)**

小文字から大文字への変換を行う

変換後の文字列を格納する領域は、引数で渡された領域が使用され、結果で上書きされる。

### **引数:**

*s* 変換対象の文字列へのポインタ

### **戻り値:**

変換後の文字列へのポインタ

## **char\* HECMW\_tolower (char \* s)**

大文字から小文字への変換を行う

変換後の文字列を格納する領域は、引数で渡された領域が使用され、結果で上書きされる。

### **引数:**

*s* 変換対象の文字列へのポインタ

### **戻り値:**

変換後の文字列へのポインタ

## **void HECMW\_print\_error (void)**

エラーメッセージをログに出力する

HECMW\_get\_errmsg()によって取得したエラーメッセージをログに出力する。

## **void HECMW\_print\_msg (int *loglv*, int *msgno*, const char \* *fmt*, ...)**

メッセージをログに出力する

可変引数で与えられた情報より生成したメッセージをログに出力する。 *loglv* と *msgno* は必須であるが、可変引数で与えられるメッセージは詳細メッセージであり、省略可能である。出力されるフォーマットは、 *msgno* に対応するメッセージ（詳細メッセージ） となる。詳細メッセージが省略された場合は、 *msgno* に対応するメッセージ となる。

#### 引数:

*loglv* 出力するログのレベル

*msgno* 出力するログのメッセージ番号

*fnt* 詳細メッセージを示す可変引数リストのフォーマット。省略時は空白文字列とすること。

... 詳細メッセージの可変引数

**void HECMW\_print\_vmsg (int *loglv*, int *msgno*, const char \* *fnt*, va\_list *ap*)**

メッセージをログに出力する

詳細メッセージの引数が異なるだけで、機能はHECMW\_print\_msg()と同じである。

#### 引数:

*loglv* 出力するログのレベル

*msgno* 出力するログのメッセージ番号

*fnt* 詳細メッセージを示す可変引数リストのフォーマット。省略時は空白文字列とすること。

*ap* 詳細メッセージの可変引数リスト



9. HEC-MW 要素ライブラリ

111 ロッド,リンク,トラス要素 (1 次)

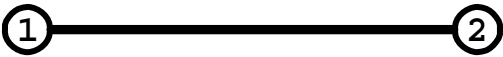

112 ロッド,リンク,トラス要素 (2 次)

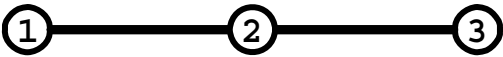

231 三角形要素 (1 次)

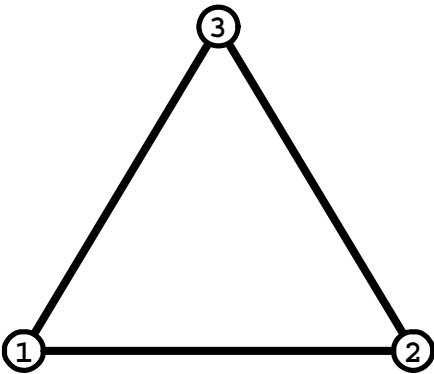

Surface ID

| ID | connectivity |
|----|--------------|
| 1  | 2 - 3        |
| 2  | 3 - 1        |
| 3  | 1 - 2        |

232 三角形要素 (2 次)

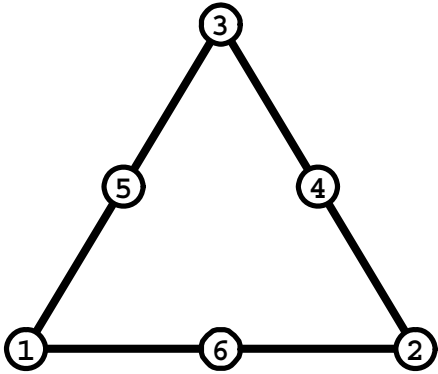

Surface ID

| ID | connectivity |
|----|--------------|
| 1  | 2 - (4) - 3  |
| 2  | 3 - (5) - 1  |
| 3  | 1 - (6) - 2  |

241 四角形要素 (1 次)

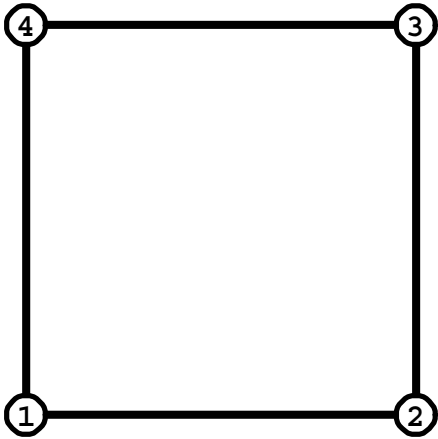

Surface ID

| ID | connectivity |
|----|--------------|
| 1  | 4 - 1        |
| 2  | 2 - 3        |
| 3  | 1 - 2        |
| 4  | 3 - 4        |

242 四角形要素（2 次）

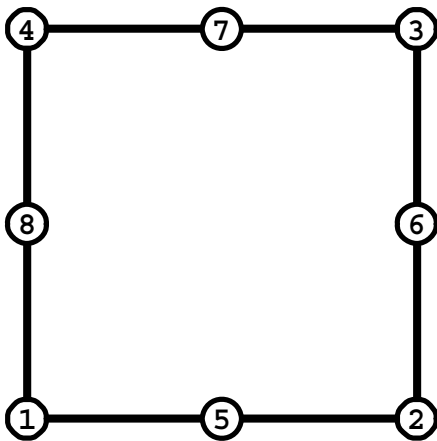

Surface ID

| ID | connectivity |
|----|--------------|
| 1  | 4 - (8) - 1  |
| 2  | 2 - (6) - 3  |
| 3  | 1 - (5) - 2  |
| 4  | 3 - (7) - 4  |

341 四面体要素（1 次）

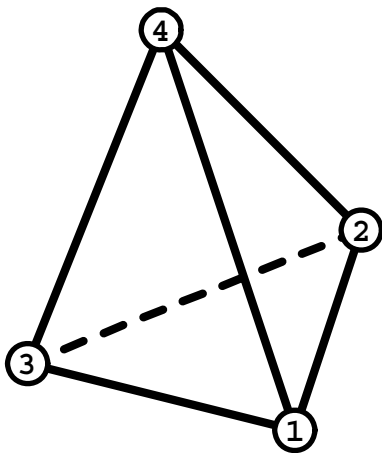

Surface ID

| ID | connectivity |
|----|--------------|
| 1  | 2 - 3 - 4    |
| 2  | 1 - 4 - 3    |
| 3  | 1 - 2 - 4    |
| 4  | 1 - 3 - 2    |



352 三角柱要素（2 次）

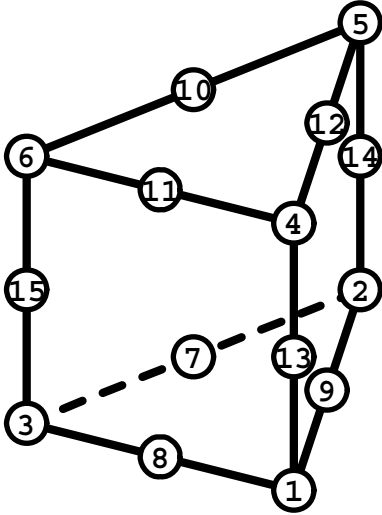

Surface ID

| ID | connectivity                             |
|----|------------------------------------------|
| 1  | 2 - (7) - 3 - (15) - 6 - (10) - 5 - (14) |
| 2  | 3 - (8) - 1 - (13) - 4 - (11) - 6 - (15) |
| 3  | 1 - (9) - 2 - (14) - 5 - (12) - 4 - (13) |
| 4  | 3 - (7) - 2 - (9) - 1 - (8)              |
| 5  | 4 - (12) - 5 - (10) - 6 - (11)           |

361 六面体要素（1 次）

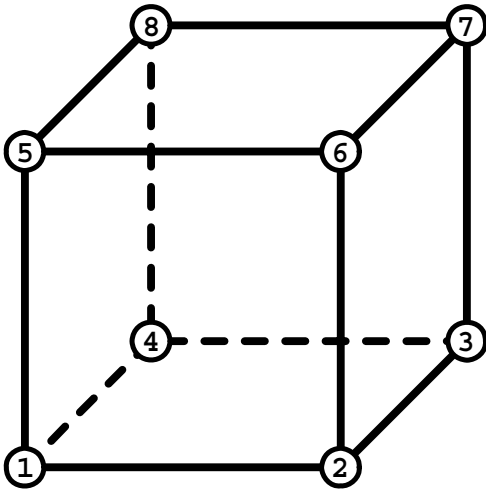

Surface ID

| ID | connectivity  |
|----|---------------|
| 1  | 4 - 1 - 5 - 8 |
| 2  | 2 - 3 - 7 - 6 |
| 3  | 1 - 2 - 6 - 5 |
| 4  | 3 - 4 - 8 - 7 |
| 5  | 4 - 3 - 2 - 1 |
| 6  | 5 - 6 - 7 - 8 |

### 362 六面体要素 (2 次)

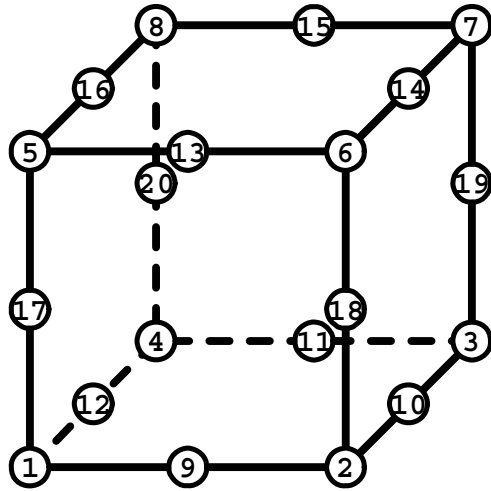

## Surface ID

| ID | connectivity                              |
|----|-------------------------------------------|
| 1  | 4 - (12) - 1 - (17) - 5 - (16) - 8 - (20) |
| 2  | 2 - (10) - 3 - (19) - 7 - (14) - 6 - (18) |
| 3  | 1 - (9) - 2 - (18) - 6 - (13) - 5 - (17)  |
| 4  | 3 - (11) - 4 - (20) - 8 - (15) - 7 - (19) |
| 5  | 4 - (11) - 3 - (10) - 2 - (9) - 1 - (12)  |
| 6  | 5 - (13) - 6 - (14) - 7 - (15) - 8 - (16) |

### 371 四角錘要素 (1 次)

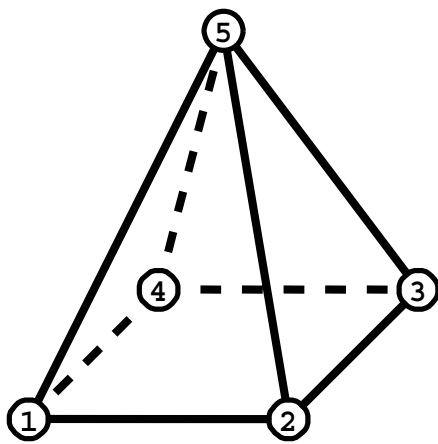Surface ID

| ID | connectivity  |
|----|---------------|
| 1  | 4 - 1 - 5     |
| 2  | 2 - 3 - 5     |
| 3  | 1 - 2 - 5     |
| 4  | 3 - 4 - 5     |
| 5  | 4 - 3 - 2 - 1 |

372 四角錐要素（2 次）

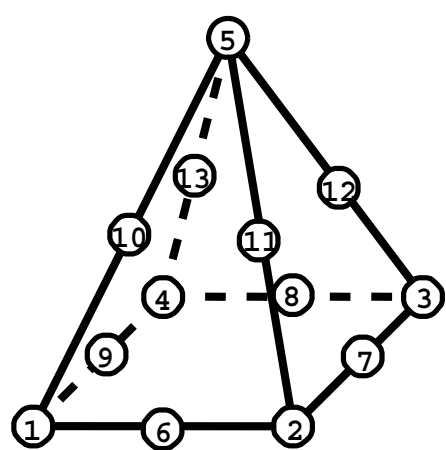

| Surface ID |                                       |
|------------|---------------------------------------|
| ID         | connectivity                          |
| 1          | 4 - (9) - 1 - (10) - 5 - (13)         |
| 2          | 2 - (7) - 3 - (12) - 5 - (11)         |
| 3          | 1 - (9) - 2 - (14) - 5 - (12)         |
| 4          | 3 - (8) - 4 - (13) - 5 - (12)         |
| 5          | 4 - (8) - 3 - (7) - 2 - (6) - 1 - (9) |

431 マスタースレーブ要素（三角形断面，1 次）

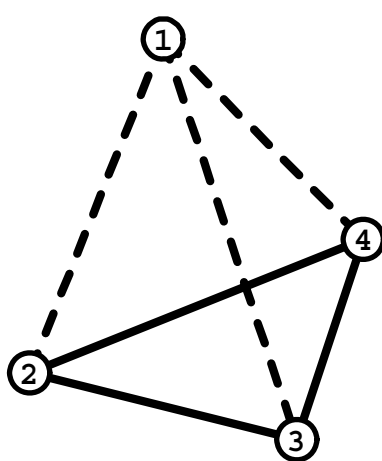

| Surface ID |              |
|------------|--------------|
| ID         | connectivity |
| 1          | 2 - 4 - 3    |

432 マスタースレーブ要素（三角形断面，2 次）

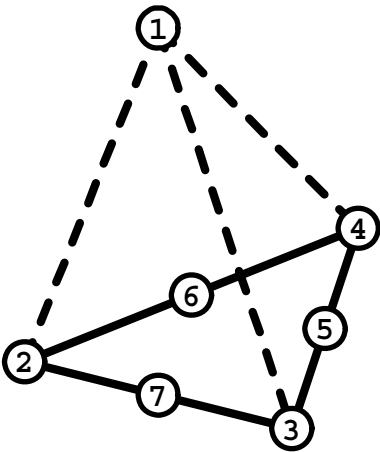

Surface ID

| ID | connectivity                |
|----|-----------------------------|
| 1  | 2 - (6) - 4 - (5) - 3 - (7) |

441 マスタースレーブ要素（四角形断面，1 次）

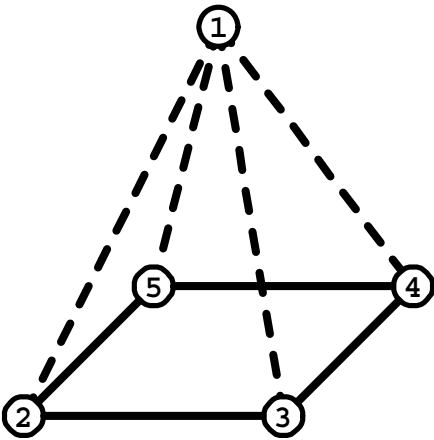

Surface ID

| ID | connectivity  |
|----|---------------|
| 1  | 5 - 4 - 3 - 2 |



442 マスタースレーブ要素（四角形断面，２次）

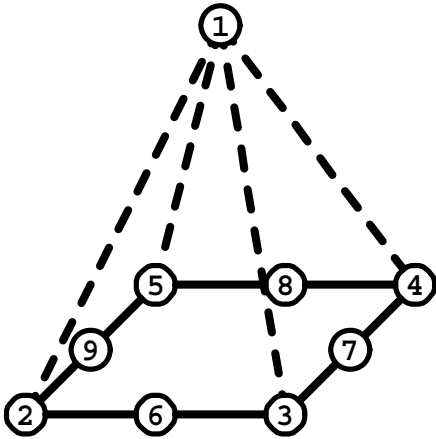

Surface ID

| ID | connectivity                          |
|----|---------------------------------------|
| 1  | 5 - (8) - 4 - (7) - 3 - (6) - 2 - (9) |

531 インタフェース要素（三角形断面，１次）

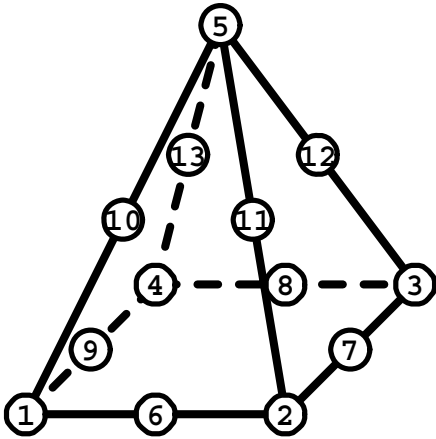

Surface ID

| ID | connectivity                          |
|----|---------------------------------------|
| 1  | 4 - (9) - 1 - (10) - 5 - (13)         |
| 2  | 2 - (7) - 3 - (12) - 5 - (11)         |
| 3  | 1 - (6) - 2 - (11) - 5 - (10)         |
| 4  | 3 - (8) - 4 - (13) - 5 - (12)         |
| 5  | 4 - (8) - 3 - (7) - 2 - (6) - 1 - (9) |

532 インタフェース要素（三角形断面，2 次）

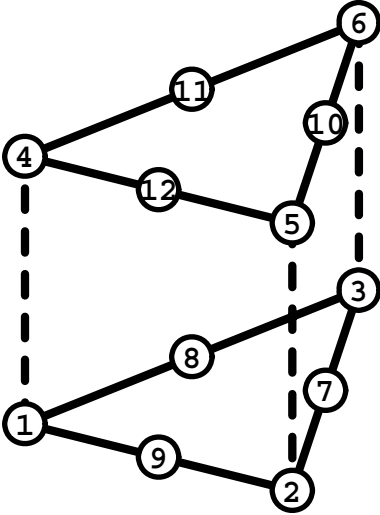

Surface ID

| ID | connectivity                   |
|----|--------------------------------|
| 1  | 3 - (7) - 2 - (9) - 1 - (8)    |
| 2  | 4 - (12) - 5 - (10) - 6 - (11) |

541 インタフェース要素（四角形断面，1 次）

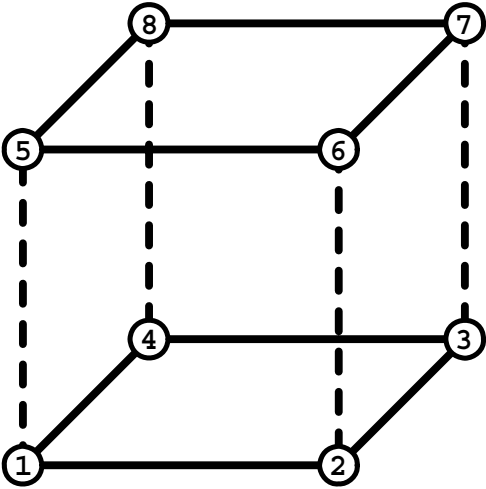

Surface ID

| ID | connectivity  |
|----|---------------|
| 1  | 4 - 3 - 2 - 1 |
| 2  | 5 - 6 - 7 - 8 |

542 インタフェース要素（四角形断面，2 次）

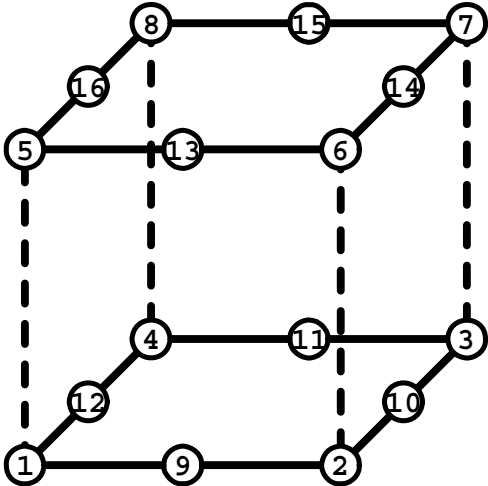

Surface ID

| ID | connectivity                              |
|----|-------------------------------------------|
| 1  | 4 - (11) - 3 - (10) - 2 - (9) - 1 - (12)  |
| 2  | 5 - (13) - 6 - (14) - 7 - (15) - 8 - (16) |

611 梁要素（1 次）

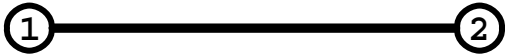

612 梁要素（2 次）

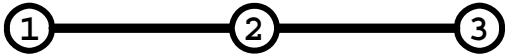

731 三角形シェル要素（1次）

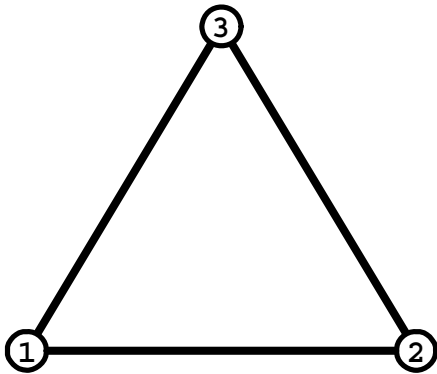

Surface ID

| ID | connectivity  |
|----|---------------|
| 1  | 1 - 2 - 3 [表] |
| 2  | 3 - 2 - 1 [裏] |

732 三角形シェル要素（2次）

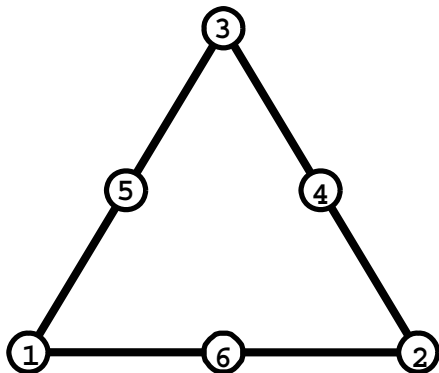

Surface ID

| ID | connectivity                    |
|----|---------------------------------|
| 1  | 1 - (6) - 2 - (4) - 3 - (5) [表] |
| 2  | 3 - (4) - 2 - (6) - 1 - (5) [裏] |

741 四角形シェル要素（1次）

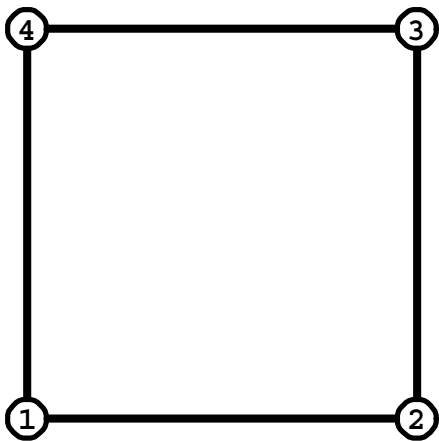

Surface ID

| ID | connectivity      |
|----|-------------------|
| 1  | 1 - 2 - 3 - 4 [表] |
| 2  | 4 - 3 - 2 - 1 [裏] |

742 四角形シェル要素（2次）

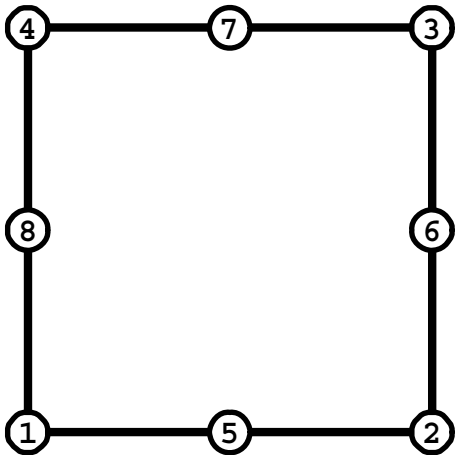

Surface ID

| ID | connectivity                              |
|----|-------------------------------------------|
| 1  | 1 - (5) - 2 - (6) - 3 - (7) - 4 - (8) [表] |
| 2  | 4 - (7) - 3 - (6) - 2 - (5) - 1 - (8) [裏] |

## 10. HEC-MW を用いたプログラム作成方法

### 10.1. はじめに

HEC-MW のほとんどの機能は API として提供されている。ユーザは、必要な機能が HEC-MW で提供されていれば、それをサブルーチンコールとして利用することができる。

以下では、HEC-MW を利用したプログラムの作成方法を紹介する。

### 10.2. コンパイル・リンク方法

HEC-MW ライブラリを使用したプログラムのコンパイル方法を示す。ただし、HEC-MW のインストールは既に完了していることを前提としている。インストール方法の詳細については、「HEC-MW インストールマニュアル」を参照すること。

インストールされた HEC-MW の各ディレクトリが以下のようになっているとする。

|                     |                          |
|---------------------|--------------------------|
| HEC-MW インクルードディレクトリ | /usr/local/hecmw/include |
| HEC-MW ライブラリディレクトリ  | /usr/local/hecmw/lib     |

また、HEC-MW をコンパイルしたコンパイラは、以下のものであるものとする。

|               |        |
|---------------|--------|
| Fortran コンパイラ | mpif90 |
|---------------|--------|

この場合、HEC-MW を利用したプログラム "test.f90" は、

```
mpif90 test.f90 -I/usr/local/hecmw/include -L/usr/local/hecmw/lib -lfhecmw -lhecmw
```

でコンパイル・リンクできる。

MPI を用いた並列環境下においては、Fortran コンパイラが mpif90 でない場合、MPI のインクルードディレクトリとライブラリディレクトリ、ライブラリを明示する必要がある。MPI を使用する場合、開発環境における MPI の利用方法を確認されたい。

### 10.3. 最小の HEC-MW 利用プログラム

HEC-MW を利用するためには以下のことをプログラム内で行わなければならない。

1. hecmw モジュールを use する
2. プログラムの最初に hecmw\_init をコールする
3. プログラムの最後で hecmw\_finalize をコールする

HEC-MW を用いた最小のプログラムを以下に示す。

test.f90

```
program test
  use hecmw
  call hecmw_init
  call hecmw_finalize
end program test
```

プログラムの冒頭では、モジュール `hecmw` を `use` する必要がある。これにより HEC-MW の全サブルーチンがアクセス可能となる。

プログラム開始直後に、サブルーチン `hecmw_init` をコールする必要がある。この中では HEC-MW API 群に必要な初期化処理と共に、並列環境で実行する場合には MPI の初期化なども行われる。

プログラムの終了直前では、サブルーチン `hecmw_finalize` をコール必要がある。これにより、並列処理時は正常に MPI を終了することが出来る。なお、この呼び出し以降何らかの処理を行うことは推奨されない。

この例のプログラムは以下のようなコマンドで、コンパイル・リンクすることが出来る。

```
mpif90 test.f90 -I/usr/local/hecmw/include -L/usr/local/hecmw/lib -lhecmw -lhecmw
```

ただし、生成された実行モジュールのみでは、正常な行えず、エラーを返すことになる。実行には、実行時のカレントディレクトリ内に、全体制御ファイル `"hecmw_ctrl.dat"` が存在する必要がある。

本例では、全体制御ファイル中の情報を参照していないので、空のファイルでも正常実行が可能である。

## 10.4. メッシュデータ入力方法

ここでは、前節の最小の HEC-MW 利用プログラムに修正し、メッシュデータの入力を可能とした例を示す。

以下に修正を加えたプログラムを示す。

```
program test
  use hecmw
  implicit none
  character(len=HECMW_NAME_LEN) :: name_ID
  type(hecmwST_local_mesh) :: mesh
  call hecmw_init,
    name_ID = 'test',
    call hecmw_get_mesh(name_ID, mesh)
  call hecmw_dist_free(mesh)
  call hecmw_finalize
end program test
```

このプログラム実行時に必要となる全体制御ファイルの内容を示す。

```
!MESH, NAME=test, TYPE=HECMW-ENTIRE
mesh.dat
```

修正プログラムには、サブルーチン `hecmw_get_mesh` が追加されている。このサブルーチンにより、メッシュデータをファイルから読み込まれ、構造体変数 `mesh` に格納される。

`hecmw_get_mesh` の引数 `name_ID` は、ファイル名を示しているのではなく、全体制御ファイルで定義されている `!MESH` の `NAME` 識別子を表している。この例では、実際に読み込まれるファイルは `"mesh.dat"` となる。

### Note:

`!MESH` で指定するファイル名は、単一領域メッシュデータについては全て実際のファイル名である、HEC-MW 分散メッシュデータに関しては、ファイル名から末尾の「.<rank>」を除いたものを指定する。よって、分散メッシュファイルのファイル名は、「全体制御ファイルから得られたファイル名.<rank>」でなければならない。

この機能により、プログラムが並列に動作している場合は、各プロセスが入力するファイルを区別することができる。

本例の全体制御ファイルでは、`TYPE=HECMW-ENTIRE` と記述されている。これは、



"mesh.dat" が HEC-MW 単一領域メッシュデータであることを示している.

TYPE には以下を指定することが可能である.

|              |                    |
|--------------|--------------------|
| HECMW-DIST   | HEC-MW 分散メッシュデータ   |
| HECMW-ENTIRE | HEC-MW 単一領域メッシュデータ |
| GEOFEM       | GeoFEM データ         |

これらの指定は全て全体制御ファイルで行うため、メッシュデータ入力のためのサブルーチンをタイプごとに記述する必要なく、全て、`hecmw_get_mesh` で読み込むことができる.

読み込まれたメッシュデータは、`hecmw_get_mesh` の第 2 引数 `mesh` で示される変数に格納される. データ格納のために必要なメモリ領域は、`hecmw_get_mesh` 内で自動的に確保される.

分散メッシュデータ構造体 `hecmwST_local_mesh` は、HEC-MW が内部的に使用するデータ構造である. メッシュデータからの情報は全てこの構造体に格納され、その後の処理に利用される. プログラム開発者はその情報を利用することができる.

以後、`hecmw_get_mesh` によって取得した分散メッシュデータ構造体をもとに、様々な処理を行うことになる.

また、サブルーチン `hecmw_dist_free` がコールされているが、これは分散メッシュデータ構造体に確保されているメモリ領域を開放するためのである.

## 10.5. メッシュデータ出力方法

この章では、メッシュデータ入力プログラムに修正を加え、メッシュデータの出力を可能にする方法について説明する.

修正を加えたプログラムを以下に示す.

```
program test
  use hecmw
  implicit none
  character(len=HECMW_NAME_LEN) :: name_ID
  type(hecmwST_local_mesh) :: mesh
  call hecmw_init
  name_ID = 'test'
  call hecmw_get_mesh(name_ID, mesh)
  name_ID = 'test-out'
  call hecmw_put_mesh(name_ID, mesh)
  call hecmw_dist_free(mesh)
  call hecmw_finalize
end program test
```

新たに追加されたサブルーチン `hecmw_put_mesh` により分散メッシュデータ構造体に格

納されているデータがファイルに出力される.

`hecmw_put_mesh` では, 出力ファイル名は全体制御ファイルで定義しておく必要がある.  
全体制御ファイルの内容を以下に示す.

```
!MESH, NAME=test, TYPE=HECMW-ENTIRE
mesh.dat

!MESH, NAME=test-out, TYPE=HECMW-DIST
mesh.out
```

入力ファイル指定のための!`MESH`(`NAME` は"`test`")に加えて, 出力ファイル指定のための!`MESH` (`NAME` は"`test-out`")が定義されている.

出力ファイルは, 必ず分散メッシュデータとして出力される. 従って, 全体制御ファイルの `TYPE` 指定にも `HECMW-DIST` を指定しなければならない.

また, 出力されるファイル名は, 全体制御ファイルから取得したファイル名に「.`<rank>`」を付加したものとなる. これにより, プログラムが並列に動作している場合は, 複数の分散ファイルが出力されることとなる.

## 10.6. 結果データ出力方法

解析処理を行った後に, 結果データを `POST` 処理用に残す場合がある. `HEC-MW` では, 結果データをファイルに出力する方法を提供している.

結果データ出力のサンプルプログラムの一部を以下に示す.

```
program test
  use hecmw
  implicit none
  character(len=HECMW_NAME_LEN) :: name_ID
  type(hecmwST_local_mesh) :: mesh
  integer(kind=kint) :: tstep, n_dof
  character(len=HECMW_HEADER_LEN) :: header
  character(len=HECMW_NAME_LEN) :: label
  real(kind=kreal), dimension(:), pointer :: displacement
  real(kind=kreal), dimension(:), pointer :: strain
  real(kind=kreal), dimension(:), pointer :: stress

  ...

  header = 'result sample'
  call hecmw_result_init(mesh, tstep, header)
  label = 'DISPLACEMENT'
  n_dof = 3
  call hecmw_result_add(1, n_dof, label, displacement)
  label = 'STRAIN'
  n_dof = 6
  call hecmw_result_add(1, n_dof, label, strain)
  label = 'STRESS'
  n_dof = 7
  call hecmw_result_add(1, n_dof, label, stress)
```

```
call hecmw_result_write()
call hecmw_result_finalize()

...

end program test
```

全体制御ファイルの内容のうち、関係する部分を以下に示す.

```
!RESULT, NAME=result-out, IO=OUT
result.out
```

結果データの出力を容易にするために、HEC-MW では以下のような結果データ出力用サブルーチンが用意されている.

- |                          |           |
|--------------------------|-----------|
| 1. hecmw_result_init     | 結果データ出力準備 |
| 2. hecmw_result_add      | 結果データ指定   |
| 3. hecmw_result_write    | 結果データ     |
| 4. hecmw_result_finalize | 結果データ出力終了 |

まず、hecmw\_result\_init によって出力ルーチン内部の初期化を行なう. これは、結果データの出力に必要な情報を事前に取得する役目がある.

取得するデータは以下のとおり.

メッシュデータ  
タイムステップ  
結果ファイルヘッダ

結果ファイルヘッダは、結果ファイルの識別しやすくするために指定する任意の文字列であり、結果ファイルの先頭行に出力される.

初期化が終了した後は、hecmw\_result\_add によって、出力したい結果データの情報を指定する. 指定する内容は以下のとおり.

指定する結果データは節点値なのか、要素値なのか (節点 : 1, 要素 : 2)  
自由度数  
結果データにつけるラベル  
結果データそのもの (浮動小数点型一次元配列)

この指定は複数回行うことができる.

また、指定した時点では、実際にはファイルへの出力は行われず、HEC-MW 内部に情報が蓄積される。従って、ここで指定したデータの内容は、実際にファイルへの出力が終了するまで変更してはならない。

出力したい結果データの指定を全て終了したら、`hocmw_result_write` を実行し実際にファイルに出力する。

出力するファイル名は全体制御ファイルから取得する。取得するファイル名は、`!RESULT` で `IO` パラメータが `OUT` のもののうち、最初に定義されているものとなる。もし、出力ファイルを明示的に指定したいのなら、`hecmw_result_write_by_name` を使用して、引数に `name_ID` を指定すると、定義されている `!RESULT` から `NAME` が該当するものを取得することができる。この場合、`IO` パラメータは無視される。

実際に出力するファイルの名前は、取得したファイル名に「.<rank>.<tstep>」を付加したものとなる。

最後に、終了処理として `hecmw_result_finalize` をコールすること。これによって、`hecmw_result_add` された情報がクリアされる。

## 10.7. 結果データ入力方法

結果データをファイルから入力するのは非常に容易である。

サンプルプログラムの一部を以下に示す。

```
...
integer(kind=kint) :: tstep
type(hecmwST_result_data) :: result
...
call hecmw_result_read(tstep, result)
...
```

全体制御データの内容のうち、関係するものを以下に示す。

```
!RESULT, NAME=result-in, IO=IN
result.in
```

結果データをファイルから入力するためには、`hpmcw_result_read` をコールするのみでよい。結果データは結果データ構造体に格納され、返される。

結果データ構造体は以下のようになっている。

```

type hecmwST_result_data
  integer(kind=kint) :: nn_component
  integer(kind=kint) :: ne_component
  integer(kind=kint), pointer :: nn_dof(:)
  integer(kind=kint), pointer :: ne_dof(:)
  character(len=HECMW_NAME_LEN), pointer :: node_label(:)
  character(len=HECMW_NAME_LEN), pointer :: elem_label(:)
  real(kind=kreal), pointer :: node_val_item(:)
  real(kind=kreal), pointer :: elem_val_item(:)
end type hecmwST_result_data

```

| 変数名           | 内容         |
|---------------|------------|
| nn_component  | 節点コンポーネント数 |
| ne_component  | 要素コンポーネント数 |
| nn_dof        | 節点自由度数     |
| ne_dof        | 要素自由度数     |
| node_label    | 節点ラベル      |
| elem_label    | 要素ラベル      |
| node_val_item | 節点値        |
| elem_val_item | 要素値        |

node\_val\_item の並びは、節点ごとに全コンポーネントが順に格納されている。

elem\_val\_item の並びは、節点ごとに全コンポーネントが順に格納されている。

結果ファイルのデータは全てこの構造体に格納されるので、これを参照して処理を行うことができる。

## 10.8. リスタートデータ出力方法

HEC-MW では、リスタートデータを出力する方法を提供している。

リスタートファイルに出力可能なデータは特に決まっておらず、ユーザが自由に選択することができる。

リスタートデータ出力の手順を以下に示す。

1. ファイルに出力したいデータを指定する（複数回可能）
2. ファイルに出力する

以下にサンプルプログラムの一部を示す。

```

...

integer(kind=kint),pointer,dimension(:) :: int_data
real(kind=kreal),pointer,dimension(:) :: real_data
real(kind=kreal),pointer,dimension(:) :: real_data2

...

allocate(int_data(100))
allocate(real_data(200))
allocate(real_data2(300))

...

call hecmw_restart_add_int(int_data, size(int_data))
call hecmw_restart_add_real(real_data, size(real_data))
call hecmw_restart_add_real(real_data2, size(real_data2))
call hecmw_restart_write()

...

```

全体制御ファイルを以下に示す.

```

!RESTART,NAME=restart-out,IO=OUT
restart.out

```

サブルーチン `hecmw_restart_add_int`, `hecmw_restart_add_real` は, それぞれ第1引数に整数型, 浮動小数点型の一次元配列をリスタートデータとして指定することができる. これらで指定された情報は, **HEC-MW** 内部に蓄えられ, ファイルに書き出されるまで保持される. 従って, 実際にファイルに出力されるまで指定したデータを書き換えてはならない.

また, 第2引数には, 指定した配列の要素数を与える.

`hecmw_restart_add_int`, `hecmw_restart_add_real` で指定されたデータは, `hecmw_restart_write` がコールされた時点でファイルに出力される.

このとき出力されるファイルの名前は, 全体制御ファイルから取得される. 実際に出力されるファイルの名前は, 「全体制御ファイルから取得したファイル名.<rank>」となる. `hecmw_rsetart_write` で取得されるファイル名は, `!RESTART` で, `IO` パラメータが `OUT` または `INOUT` のもののうち, 最初に定義されたものである. `hecmw_restart_write_by_name` を使用すると, `NAME` が指定できる. この場合, `IO` パラメータは無視される.

## 10.9. リスタートデータ入力方法

リスタートファイルからリスタートデータを入力するには, 以下のようにする.

1. リスタートファイルをオープンする

2. リスタートファイルから入力（出力した時と同じ回数）
3. リスタートファイルをクローズする

以下にサンプルプログラムの一部を示す.

```
...  
  
integer(kind=kint),pointer,dimension(:) :: int_data  
real(kind=kreal),pointer,dimension(:) :: real_data  
real(kind=kreal),pointer,dimension(:) :: real_data2  
  
allocate(int_data(100))  
allocate(real_data(200))  
allocate(real_data2(300))  
call hecmw_restart_open()  
call hecmw_restart_read_int(int_data)  
call hecmw_restart_read_real(real_data)  
call hecmw_restart_read_real(real_data2)  
call hecmw_restart_close()  
  
...
```

以下に全体制御ファイルを示す.

```
!RESTART,NAME=restart-in,I0=IN  
restart.in
```

リスタートファイルのオープンは, `hecmw_restart_open` で行う.

このときオープンされるファイルは, `!RESTART` で I/O パラメータが `IN` または `INOUT` のもののうち, 最初に定義されているものとなる. `hecmw_restart_open_by_name` を使用すれば, `NAME` 指定ができる. この場合, I/O パラメータは無視される.

オープンした後は, `hecmw_restart_read_int`, `hecmw_restart_read_real` によって, 実際にファイルからデータを入力し, 変数に格納する. このとき注意すべきことは, リスタートの入力と出力は整合性を取らなければならないということである. つまり, 出力と入力の順番, 型, 配列要素数は全て一致していなければならない. また, 格納先の領域は事前にユーザが確保しておく必要がある.

全てのリスタートデータを入力し終わったら, `hecmw_restart_close` によってファイルを閉じる.

## 10.10. 可視化方法（メモリ渡し）

可視化には, ファイル渡しとメモリ渡しの二通りの方法がある.

ファイル渡しとは, 解析の結果データを予め結果ファイルとしてファイルに出力しておき,

それを別プロセスとして可視化機能を実行し可視化を行う方法である。

メモリ渡しとは、解析終了後、メモリ上に存在している結果データを使用して同一プロセスで可視化まで行う方法である。

可視化の手順は以下のとおりである。

1. 可視化データ構造体の作成
2. 可視化初期化
3. 可視化
4. 可視化終了処理

ここでは可視化の詳細には触れませんが、以上の手順を踏めばよいことになる。

サンプルプログラムの一部を以下に示す。

```
...  
integer(kind=kint) :: step, max_step, is_force  
type(hecmwST_result_data) :: result  
...  
call hecmw_visualize_init  
call hecmw_visualize(mesh, result, step, max_step, is_force)  
call hecmw_visualize_finalize  
...
```

まず、可視化を行うために結果データが必要である。この結果データは、ユーザが結果データ構造体に格納しておく必要がある。

`hecmw_visualize_init` によって可視化の初期化を行う。

次に、`hecmw_visualize` をコールすると、実際に可視化が行われる。

可視化実行時に与える情報は以下のとおりである。

メッシュデータ

結果データ

タイムステップ

最大タイムステップ

最後のステップで強制的に描くかどうかのフラグ

最後に可視化の終了処理として、`hecmw_visualize_finalize` をコールすること。

以上で、可視化が終了する。
