# Supplementary material
Source: ML conference proceedings conference paper supplement (https://openreview.net/forum?id=FX0vR39SJ5q)
Supplement: supplementary_material [file attachment]

文部科学省次世代IT基盤構築のための研究開発  
「革新的シミュレーションソフトウェアの研究開発」

RSS21 フリーソフトウェア

# HEC ミドルウェア (HEC-MW)

PC クラスター用ライブラリ型 HEC-MW

(hecmw-PC-cluster) バージョン 2.01

## インストールマニュアル

本ソフトウェアは文部科学省次世代IT基盤構築のための研究開発「革新的シミュレーションソフトウェアの研究開発」プロジェクトによる成果物です。本ソフトウェアを無償でご使用になる場合「RSS21 フリーソフトウェア使用許諾条件」をご了承頂くことが前提となります。営利目的の場合には別途契約の締結が必要です。これらの契約で明示されていない事項に関して、或いは、これらの契約が存在しない状況においては、本ソフトウェアは著作権法など、関係法令により、保護されています。

お問い合わせ先

(公開／契約窓口) (財)生産技術研究奨励会

〒153-8505 東京都目黒区駒場4-6-1

(ソフトウェア管理元) 東京大学生産技術研究所 計算科学技術連携研究センター

〒153-8505 東京都目黒区駒場4-6-1

Fax : 03-5452-6662

E-mail : software@rss21.iis.u-tokyo.ac.jp

## 目 次

|           |                              |          |
|-----------|------------------------------|----------|
| <b>1.</b> | <b>はじめに .....</b>            | <b>1</b> |
| <b>2.</b> | <b>動作環境 .....</b>            | <b>2</b> |
| 2.1.      | 必要なソフトウェア .....              | 2        |
| 2.2.      | 動作確認環境 .....                 | 3        |
| <b>3.</b> | <b>アーカイブファイルの解凍・展開 .....</b> | <b>4</b> |
| 3.1.      | アーカイブの解凍 .....               | 4        |
| <b>4.</b> | <b>インストール .....</b>          | <b>5</b> |
| 4.1.      | はじめに .....                   | 5        |
| 4.2.      | Makefile.conf の編集 .....      | 5        |
| 4.3.      | setup.sh の実行 .....           | 5        |
| 4.4.      | make の実行 .....               | 7        |
| 4.5.      | make install の実行 .....       | 7        |
| <b>5.</b> | <b>付録 .....</b>              | <b>8</b> |
| 5.1.      | Makefile.conf の変数一覧 .....    | 8        |
| 5.2.      | Makefile.conf の設定例 .....     | 16       |

# 1. はじめに

本マニュアルでは, PC クラスタ向け HEC-MW ライブラリ (hecmw-PC-Cluster) バージョン 2.1 のインストール方法について説明しています.

## 2. 動作環境

### 2.1. 必要なソフトウェア

本ソフトウェアのインストールに際しては、インストールする環境に下記のソフトウェアがインストールされている必要があります。なお、これら必要なソフトウェアのインストールについては、本マニュアルでは割愛します。各ソフトウェアのインストールマニュアルをご参照下さい。

#### **C, Fortran90 コンパイラ**

本ソフトウェアのインストールには、C および Fortran90 コンパイラが必要です。

#### **MPI**

本ソフトウェアは、MPI により並列化されており、MPI-1 規格に準拠した MPI ライブラリが必要となります。MPI を実装したフリーで利用できるライブラリの代表的なものには、MPICH や LAM/MPI などがあります。MPICH は下記の WEB サイトからダウンロードすることができます。

<http://www-unix.mcs.anl.gov/mpi/mpich/>

#### **METIS**

本ソフトウェアの領域分割ユーティリティは、METIS のライブラリを使用することで pMETIS, kMETIS による領域分割が可能です。これらによる領域分割をご利用になる場合には METIS が必要となります。なお、METIS がインストールされていない環境でも、RCB による領域分割は可能です。METIS は下記の WEB サイトからダウンロードすることができます。

<http://www-users.cs.umn.edu/~karypis/metis/index.html>

#### **ParMETIS**

本ソフトウェアの動的負荷分散ライブラリは ParMETIS のライブラリを使用しています。このライブラリをご利用になる場合には ParMETIS が必要となります。動的負荷分散ライブラリをご利用にならない場合には ParMETIS は不要です。ParMETIS は下記の WEB サイトからダウンロードすることができます。

<http://www-users.cs.umn.edu/~karypis/metis/index.html>

## 2.2. 動作確認環境

本ソフトウェアは、下記の環境において動作確認を行っています。ただし、これ以外の環境においても、前述のインストールに必要なソフトウェアが導入されている環境では、正常に動作すると思われます。

**HEC-MW ライブラリの動作確認環境**

| 環境 (OS)                                   | C コンパイラ                                                       | Fortran90 コンパイラ                                                   | 並列化環境             |
|-------------------------------------------|---------------------------------------------------------------|-------------------------------------------------------------------|-------------------|
| Intel Xeon Cluster<br>(Red Hat Linux 7.3) | Intel C++ Compiler<br>for 32-bit applications,<br>Version 9.0 | Intel Fortran Compiler<br>for 32-bit applications,<br>Version 9.0 | MPICH<br>1.2.7-p1 |
| Windows XP (32bit)                        | GNU Compiler Collection,<br>gcc Version 4.3.0 20070416        | GNU Compiler Collection,<br>gfortran Version 4.3.0 20070416       | MPICH 2.0         |
| AMD Opteron Cluster<br>(CentOS 4.4)       | Intel C++ Compiler<br>for 64-bit applications,<br>Version 9.1 | Intel Fortran Compiler<br>for 64-bit applications,<br>Version 9.1 | MPICH<br>1.2.7-p1 |
| Intel Itanium2<br>Cluster (Red Hat 7.3)   | Intel C++ Compiler<br>for 64-bit applications,<br>Version 9.1 | Intel Fortran Compiler<br>for 64-bit applications,<br>Version 9.1 | MPICH<br>1.2.7-p1 |

## 3. アーカイブファイルの解凍・展開

### 3.1. アーカイブの解凍

アーカイブファイルは、tar によりアーカイブ化されており、gzip により圧縮されています。これらアーカイブファイルを、下記のようにして解凍、展開します（行頭の\$はプロンプトを示します）。

```
$ tar xzf hecmw-2.1.tar.gz
```

本ソフトウェアをインストールする環境の tar コマンドが z オプションをサポートしていない場合には、gzip コマンドを使って下記のように解凍、展開します。

```
$ gzip -dc hecmw-2.1.tar.gz | tar xf -
```

アーカイブファイルを解凍、展開すると、アーカイブを展開したディレクトリに「hecmw」というディレクトリが作成されます（以下、このディレクトリを\${HECMWBUILDDIR}と記します）。

## 4. インストール

### 4.1. はじめに

本章では、HEC-MW ライブラリのインストール手順について説明します。

### 4.2. Makefile.conf の編集

`${HECMWBUILDDIR}`にある `Makefile.conf` を、本ソフトウェアをインストールする計算機環境に合わせて編集します。定義する変数は数多くありますが、ほとんどの変数については初期値をそのまま利用できます。多くの環境では、下記の変数以外は、変更する必要はないと思います。

|                          |                               |
|--------------------------|-------------------------------|
| <code>MPIDIR</code>      | : MPI がインストールされているディレクトリ      |
| <code>PREFIX</code>      | : 本ソフトウェアをインストールするディレクトリ      |
| <code>METISDIR</code>    | : METIS がインストールされているディレクトリ    |
| <code>PARMETISDIR</code> | : ParMETIS がインストールされているディレクトリ |
| <code>CC</code>          | : C コンパイラ起動コマンド               |
| <code>F90</code>         | : Fortran90 コンパイラ起動コマンド       |

全ての変数の詳細については、「**5.1. Makefile.conf の変数一覧**」をご参照下さい。また、「**5.2. Makefile.conf の設定例**」に、動作確認環境における `Makefile.conf` の設定例が記載されていますので、編集の際に参考にして下さい。

### 4.3. setup.sh の実行

`${HECMWBUILDDIR}`にて、シェルスクリプト `setup.sh` を下記のように実行し、`Makefile.conf` の設定に従って `Makefile` を作成します。

```
$ ./setup.sh
```

並列計算用のライブラリを生成する場合などは、下記のオプションを指定して `setup.sh` を実行して下さい。

## setup.sh 実行時オプション

| オプション             | 意 味                  | 備 考                     |
|-------------------|----------------------|-------------------------|
| -g 又は --debug     | デバック用ライブラリ生成         |                         |
| -p 又は --parallel  | 並列実行用ライブラリ生成         |                         |
| --with-tools      | パーティショナなどツールの生成      |                         |
| --with-metis      | METIS の使用            |                         |
| --with-parmetis   | ParMETIS の使用         | -p が必要                  |
| --with-amr        | 適応格子機能ライブラリ生成        |                         |
| --with-dlb        | 動的負荷分散機能ライブラリ生成      | -p, --with-parmetis が必要 |
| --without-matass  | マトリックスアセンブリ機能の除外     |                         |
| --without-matcon  | マトリックスコンストラクション機能の除外 |                         |
| --without-jacob   | ヤコビアン関連機能の除外         |                         |
| --without-fortran | Fortran ルーチンの除外      | ソルバ機能を使用する場合には付加しない     |

以下では、setup.sh 実行時の例を示します。

### 並列処理用にコンパイルする場合

MPI がインストールされている並列環境で本ソフトウェアを使用する場合、下記のように --parallel または -p オプションを付けて setup.sh を起動します。

```
$ ./setup.sh -p
```

### METIS を使用する場合

METIS がインストールされている環境では、下記のように --with-metis オプションを付けて setup.sh を実行すると、METIS の使用が可能となります。

```
$ ./setup.sh --with-metis
```

なお、上記のように setup.sh を起動しなければ、領域分割ユーティリティにおいて METIS (pMETIS, kMETIS) による領域分割は行なえません (RCB による領域分割は可能です)。

### ParMETIS を使用する場合

ParMETIS がインストールされている環境では、下記のように --with-parmetis オプションを付けて setup.sh を実行すると、ParMETIS の使用が可能となります。



```
$ ./setup.sh --with-parmetis
```

なお、動的負荷分散ライブラリを使用する場合には、必ずこのオプションを実行して下さい。

## 4.4. make の実行

`${HECMWBUILDDIR}`にて、`make` を実行します。

```
$ make
```

`make` の実行には、計算機環境によっては数分かかる場合があります。実行中にエラーが生じた場合には、`Makefile.conf` の設定の見直し等を行なってください。

`make` が正常に終了すると、`${HECMWBUILDDIR}`に `bin`, `lib`, `include` というディレクトリが作成され、`bin` ディレクトリには実行ファイルが、`lib` ディレクトリにはライブラリが、`include` ディレクトリにはヘッダーファイル等が置かれます。

## 4.5. make install の実行

`make` の実行が正常に終了したら、`Makefile.conf` で指定したディレクトリに本ソフトウェアをインストールするために、下記のように `make install` を実行します。

```
$ make install
```

## 5. 付録

### 5.1. Makefile.conf の変数一覧

#### 5.1.1. MPI に関する設定

---

##### **MPIDIR**

---

**説明：**

MPI のインストールされているディレクトリのパスを指定する。

**初期値：**

/opt/swimmy

---

##### **MPIBINDIR**

---

**説明：**

MPI の実行ファイル群がインストールされているディレクトリのパスを指定する。ほとんどの環境では、この変数の値を初期値から変更する必要はない。

**初期値：**

\$(MPIDIR)/bin

---

##### **MPILIBDIR**

---

**説明：**

MPI のライブラリ群がインストールされているディレクトリのパスを指定する。ほとんどの環境では、この変数の値を初期値から変更する必要はない。

**初期値：**

\$(MPIDIR)/lib

---

##### **MPIINCDir**

---

**説明 :**

MPI のヘッダーファイル群がインストールされているディレクトリのパスを指定する。ほとんどの環境では、この変数の値を初期値から変更する必要はない。

**初期値 :**

`$(MPIDIR)/include`

---

## **MPILIBS**

---

**説明 :**

C および Fortran90 のオブジェクトファイルにリンクさせる MPI ライブラリを指定する。

**初期値 :**

`-lmpich -lfmpich`

### **5.1.2. インストールディレクトリに関する設定**

---

## **PREFIX**

---

**説明 :**

本ソフトウェアをインストールするディレクトリのパスを指定する。

**初期値 :**

`/usr/local/hecmw`

---

## **BINDIR**

---

**説明 :**

本ソフトウェアの実行ファイル群をインストールするディレクトリのパスを指定する。通常は、この変数の値を変更する必要はない。

**初期値 :**

`$(PREFIX)/bin`

---

## **LIBDIR**

---

**説明：**

本ソフトウェアのライブラリ群をインストールするディレクトリのパスを指定する。通常は、この変数の値を初期値から変更する必要はない。

**初期値：**

`$(PREFIX)/lib`

---

**INCLUDEDIR**

---

**説明：**

本ソフトウェアのヘッダーファイル群をインストールするディレクトリのパスを指定する。通常は、この変数の値を初期値から変更する必要はない。

**初期値：**

`$(PREFIX)/include`

### 5.1.3. METIS に関する設定

---

**METISDIR**

---

**説明：**

METIS がインストールされているディレクトリのパスを指定する。

**初期値：**

`/usr/local/metis`

---

**METISLIBDIR**

---

**説明：**

METIS のライブラリ (`libmetis.a`) がインストールされているディレクトリのパスを指定する。基本的には、この変数の値を初期値から変更する必要はない。

**初期値：**

`$(METISDIR)`

---

## METISINCDIR

---

### 説明 :

METIS のヘッダーファイル群 (metis.h など) がインストールされているディレクトリのパスを指定する。基本的には、この変数の値を初期値から変更する必要はない。

### 初期値 :

`$(METISDIR)/Lib`

## 5.1.4. ParMETIS に関する設定

---

## PARMETISDIR

---

### 説明 :

ParMETIS がインストールされているディレクトリのパスを指定する。

### 初期値 :

`/usr/local/ParMETIS`

---

## PARMETISLIBDIR

---

### 説明 :

ParMETIS のライブラリ (libparmetis.a) がインストールされているディレクトリのパスを指定する。基本的には、この変数の値を初期値から変更する必要はない。

### 初期値 :

`$(PARMETISDIR)`

---

## PAEMETISINCDIR

---

### 説明 :

ParMETIS のヘッダーファイル群 (parmetis.h など) がインストールされているディレクトリのパスを指定する。基本的には、この変数の値を初期値から変更する必要はない。

### 初期値 :

`$(PARMETISDIR)/ParMETISLib`

### 5.1.5. C コンパイラに関する設定

---

#### CC

---

**説明：**

C コンパイラの起動コマンドを指定する。

**初期値：**

`$(MPIBINDIR)/mpicc`

---

#### CFLAGS

---

**説明：**

C コンパイラに付与するコンパイラオプションを指定する。基本的には、この変数の値を初期値から変更する必要はない。

**初期値：**

[値なし]

---

#### LDFLAGS

---

**説明：**

C リンカに付与するリンカオプションを指定する。基本的には、この変数の値を初期値から変更する必要はない。

**初期値：**

`$(MPILIBS)`

---

#### OPTFLAGS

---

**説明：**

C コンパイラに付与する最適化オプションなどを指定する。

**初期値：**

`-O`

### 5.1.6. Fortran90 コンパイラに関する設定

---

#### F90

---

**説明 :**

Fortran90 コンパイラの起動コマンドを指定する.

**初期値 :**

`$(MPIBINDIR)/mpif90`

---

#### F90FLAGS

---

**説明 :**

Fortran90 コンパイラに付与するコンパイラオプションを指定する. 基本的には, この変数の値を初期値から変更する必要はない.

**初期値 :**

[値なし]

---

#### F90LDFLAGS

---

**説明 :**

Fortran90 リンカに付与するリンカオプションを指定する. 基本的には, この変数の値は初期値から変更する必要はない.

**初期値 :**

`$(MPILIBS)`

---

#### F90OPTFLAGS

---

**説明 :**

Fortran90 コンパイラに付与する最適化オプションなどを指定する.

**初期値 :**

`-O`

### 5.1.7. UNIX コマンドに関する設定

---

#### MAKE

---

**説明：**

`make` の起動コマンドを指定する。オプションが必要な場合は同時に指定する。通常は、この変数の値を初期値から変更する必要はない。

**初期値：**

`make`

---

#### CP

---

**説明：**

ファイルやディレクトリをコピーするコマンドを指定する。オプションが必要な場合は同時に指定する。通常は、この変数の値を初期値から変更する必要はない。

**初期値：**

`cp -f`

---

#### RM

---

**説明：**

ファイルやディレクトリを削除するコマンドを指定する。オプションが必要な場合は同時に指定する。通常は、この変数の値を初期値から変更する必要はない。

**初期値：**

`rm -f`

---

#### AR

---

**説明：**

書庫（アーカイブ）の作成、変更などを行なうコマンドを指定する。オプションが必要な場合は同時に指定する。通常は、この変数の値を初期値から変更する必要はない。



**初期値：**

`ar ruv`

---

## **MKDIR**

---

**設定：**

ディレクトリを作成するコマンドを指定する。オプションが必要な場合には、オプションも同時に指定する。通常は、この変数の値を初期値から変更する必要はない。

**初期値：**

`mkdir -p`

## 5.2. Makefile.conf の設定例

(赤字で示した変数は、値が初期値から変更されているものです)

Intel Xeon Cluster ( Red Hat Linux 7.3 )

Intel C++ Compiler for 32-bit applications, Version 7.1

Intel Fortran Compiler for 32-bit applications, Version 7.1

MPICH 1.2.4

**MPIDIR** = /opt/swimmy/mpi/mpich-intel71-1.2.4

MPIBINDIR = \$(MPIDIR)/bin

MPILIBDIR = \$(MPIDIR)/lib

MPIINC\_DIR = \$(MPIDIR)/include

MPILIBS = -lmpich -lfmpich

**PREFIX** = /usr/local/hecmw-1.20-mpich-intel7

BINDIR = \$(PREFIX)/bin

LIBDIR = \$(PREFIX)/lib

INCLUDEDIR = \$(PREFIX)/include

CC = \$(MPIBINDIR)/mpicc

CFLAGS =

LD\_FLAGS = \$(MPILIBS)

OPT\_FLAGS = -O

F90 = \$(MPIBINDIR)/mpif90

F90\_FLAGS =

F90\_LD\_FLAGS = \$(MPILIBS)

F90\_OPT\_FLAGS = -O

**METISDIR** = /usr/local/metis-4.0

METISLIBDIR = \$(METISDIR)

METISINC\_DIR = \$(METISDIR)/Lib

**PARMETISDIR** = /usr/local/ParMetis-3.1

PARMETISLIBDIR = \$(PARMETISDIR)

PARMETISINC\_DIR = \$(PARMETISDIR)/ParMETISLib

MAKE = make

CP = cp -f

RM = rm -f

AR = ar ruv

MKDIR = mkdir -p

Intel Xeon Cluster ( Red Hat Linux 7.3 )

PGI CDK 4.0 (PGI Fortran Compiler 4.0-2, PGI C Compiler 4.0-2)

MPICH 1.2.4

**MPIDIR** = /opt/swimmy/mpi/mpich-pgi-1.2.4

MPIBINDIR = \$(MPIDIR)/bin

MPILIBDIR = \$(MPIDIR)/lib

MPIINCDir = \$(MPIDIR)/include

MPILIBS = -lmpich -lfmpich

**PREFIX** = /usr/local/hecmw-1.20-mpich-pgi

BINDIR = \$(PREFIX)/bin

LIBDIR = \$(PREFIX)/lib

INCLUDEDIR = \$(PREFIX)/include

CC = \$(MPIBINDIR)/mpicc

CFLAGS =

LDFlags = \$(MPILIBS)

OPTFlags = -O

F90 = \$(MPIBINDIR)/mpif90

F90Flags =

F90LDFlags = \$(MPILIBS)

F90OPTFlags = -O

**METISDIR** = /usr/local/metis-4.0

METISLIBDIR = \$(METISDIR)

METISINCDIR = \$(METISDIR)/Lib

**PARMETISDIR** = /usr/local/ParMetis-3.1

PARMETISLIBDIR = \$(PARMETISDIR)

PARMETISINCDIR = \$(PARMETISDIR)/ParMETISLib

MAKE = make

CP = cp -f

RM = rm -f

AR = ar ruv

MKDIR = mkdir -p

Intel Xeon Cluster ( Red Hat Linux 7.3 )

Intel C++ Compiler for 32-bit applications, Version 7.1

Intel Fortran Compiler for 32-bit applications, Version 7.1

SCore 5.2.0 / MPICH 1.2.4

```
MPIDIR           = /opt/score
MPIBINDIR         = $(MPIDIR)/bin
MPILIBDIR         = $(MPIDIR)/lib
MPIINCDir         = $(MPIDIR)/include
MPILIBS           = -lmpich -lfmpich

PREFIX           = /usr/local/hecmw-1.20-score-intel7
BINDIR            = $(PREFIX)/bin
LIBDIR            = $(PREFIX)/lib
INCLUDEDIR        = $(PREFIX)/include

CC               = $(MPIBINDIR)/mpicc -compiler=intel7
CFLAGS            =
LDFlags           = $(MPILIBS)
OPTFlags          = -O

F90              = $(MPIBINDIR)/mpif90 -compiler=intel7
F90Flags          =
F90LDFlags        = $(MPILIBS)
F90OPTFlags       = -O

METISDIR         = /usr/local/metis-4.0
METISLIBDIR       = $(METISDIR)
METISINCDIR       = $(METISDIR)/Lib

PARMETISDIR      = /usr/local/ParMetis-3.1
PARMETISLIBDIR    = $(PARMETISDIR)
PARMETISINCDIR    = $(PARMETISDIR)/ParMETISLib

MAKE              = make
CP                = cp -f
RM               = rm -f
AR               = ar ruv
MKDIR             = mkdir -p
```

Intel Xeon Cluster ( Red Hat Linux 7.3 )

PGI CDK 4.0 (PGI Fortran Compiler 4.0-2, PGI C Compiler 4.0-2)

SCore 5.2.0 / MPICH 1.2.4

```
MPIDIR           = /opt/score
MPIBINDIR        = $(MPIDIR)/bin
MPILIBDIR        = $(MPIDIR)/lib
MPIINCDir        = $(MPIDIR)/include
MPILIBS          = -lmpich -lfmpich

PREFIX          = /usr/local/hecmw-1.20-score-pgi
BINDIR           = $(PREFIX)/bin
LIBDIR           = $(PREFIX)/lib
INCLUDEDIR       = $(PREFIX)/include

CC              = $(MPIBINDIR)/mpicc -compiler=pgi
CFLAGS           =
LDFlags          = $(MPILIBS)
OPTFlags         = -O

F90            = $(MPIBINDIR)/mpif90 -compiler=pgi
F90Flags         =
F90LDFlags       = $(MPILIBS)
F90OPTFlags      = -O

METISDIR       = /usr/local/metis-4.0
METISLIBDIR      = $(METISDIR)
METISINCDIR      = $(METISDIR)/Lib

PARMETISDIR    = /usr/local/ParMetis-3.1
PARMETISLIBDIR   = $(PARMETISDIR)
PARMETISINCDIR   = $(PARMETISDIR)/ParMETISLib

MAKE             = make
CP               = cp -f
RM               = rm -f
AR               = ar ruv
MKDIR            = mkdir -p
```

Intel Pentium Linux ( Red Hat Linux 7.3 )

gcc 2.96

Intel Fortran Compiler for 32-bit applications, Version 7.1

MPICH 1.2.5.2

**MPIDIR** = /usr/local/mpich-1.2.5.2-gcc2-ifc7

MPIBINDIR = \$(MPIDIR)/bin

MPILIBDIR = \$(MPIDIR)/lib

MPIINCDir = \$(MPIDIR)/include

MPILIBS = -lmpich -lfmpich

**PREFIX** = /usr/local/hecmw-1.20-gcc2-ifc7

BINDIR = \$(PREFIX)/bin

LIBDIR = \$(PREFIX)/lib

INCLUDEDIR = \$(PREFIX)/include

CC = \$(MPIBINDIR)/mpicc

CFLAGS =

LDFlags = \$(MPILIBS)

OPTFlags = -O

F90 = \$(MPIBINDIR)/mpif90

F90Flags =

F90LDFlags = \$(MPILIBS)

F90OPTFlags = -O

**METISDIR** = /usr/local/metis-4.0

METISLIBDIR = \$(METISDIR)

METISINCDIR = \$(METISDIR)/Lib

**PARMETISDIR** = /usr/local/ParMetis-3.1

PARMETISLIBDIR = \$(PARMETISDIR)

PARMETISINCDIR = \$(PARMETISDIR)/ParMETISLib

MAKE = make

CP = cp -f

RM = rm -f

AR = ar ruv

MKDIR = mkdir -p

Intel Pentium Linux ( Red Hat Linux 7.3 )

gcc 2.96

Fujitsu Fortran Compiler Driver version 3.0

MPICH 1.2.5.2

**MPIDIR** = /usr/local/mpich-1.2.5.2-gcc2-frt3

MPIBINDIR = \$(MPIDIR)/bin

MPILIBDIR = \$(MPIDIR)/lib

MPIINCDir = \$(MPIDIR)/include

MPILIBS = -lmpich -lfmpich

**PREFIX** = /usr/local/hecmw-1.20-gcc2-frt3

BINDIR = \$(PREFIX)/bin

LIBDIR = \$(PREFIX)/lib

INCLUDEDIR = \$(PREFIX)/include

CC = \$(MPIBINDIR)/mpicc

CFLAGS =

LDFlags = \$(MPILIBS)

OPTFlags = -O

F90 = \$(MPIBINDIR)/mpif90

F90Flags =

F90LDFlags = \$(MPILIBS)

F90OPTFlags = -O

**METISDIR** = /usr/local/metis-4.0

METISLIBDIR = \$(METISDIR)

METISINCDIR = \$(METISDIR)/Lib

**PARMETISDIR** = /usr/local/ParMetis-3.1

PARMETISLIBDIR = \$(PARMETISDIR)

PARMETISINCDIR = \$(PARMETISDIR)/ParMETISLib

MAKE = make

CP = cp -f

RM = rm -f

AR = ar ruv

MKDIR = mkdir -p

Intel Pentium Linux ( Red Hat Linux 7.3 )

Fujitsu C Compiler Driver version 3.0

Fujitsu Fortran Compiler Driver version 3.0

MPICH 1.2.5.2

**MPIDIR** = /usr/local/mpich-1.2.5.2-fcc3-frt3

MPIBINDIR = \$(MPIDIR)/bin

MPILIBDIR = \$(MPIDIR)/lib

MPIINCDir = \$(MPIDIR)/include

MPILIBS = -lmpich -lfmpich

**PREFIX** = /usr/local/hecmw-1.20-fcc3-frt3

BINDIR = \$(PREFIX)/bin

LIBDIR = \$(PREFIX)/lib

INCLUDEDIR = \$(PREFIX)/include

CC = \$(MPIBINDIR)/mpicc

CFLAGS =

LDFlags = \$(MPILIBS)

OPTFlags = -O

F90 = \$(MPIBINDIR)/mpif90

F90Flags =

F90LDFlags = \$(MPILIBS)

F90OPTFlags = -O

**METISDIR** = /usr/local/metis-4.0

METISLIBDIR = \$(METISDIR)

METISINCDIR = \$(METISDIR)/Lib

**PARMETISDIR** = /usr/local/ParMetis-3.1

PARMETISLIBDIR = \$(PARMETISDIR)

PARMETISINCDIR = \$(PARMETISDIR)/ParMETISLib

MAKE = make

CP = cp -f

RM = rm -f

AR = ar ruv

MKDIR = mkdir -p
