# Supplementary material
Source: ML conference proceedings conference paper supplement (https://openreview.net/forum?id=FX0vR39SJ5q)
Supplement: supplementary_material [file attachment]

文部科学省次世代IT基盤構築のための研究開発  
「革新的シミュレーションソフトウェアの研究開発」

RSS21 フリーソフトウェア

# HEC ミドルウェア (HEC-MW)

FrontSTR 入力データ変換プログラム

**neu2fstr** バージョン 1.01

## ユーザーズマニュアル

本ソフトウェアは文部科学省次世代IT基盤構築のための研究開発「革新的シミュレーションソフトウェアの研究開発」プロジェクトによる成果物です。本ソフトウェアを無償でご使用になる場合「RSS21フリーソフトウェア使用許諾条件」をご了承頂くことが前提となります。営利目的の場合には別途契約の締結が必要です。これらの契約で明示されていない事項に関して、或いは、これらの契約が存在しない状況においては、本ソフトウェアは著作権法など、関係法令により、保護されています。

お問い合わせ先

(公開／契約窓口) (財)生産技術研究奨励会

〒153-8505 東京都目黒区駒場4-6-1

(ソフトウェア管理元) 東京大学生産技術研究所 計算科学技術連携研究センター

〒153-8505 東京都目黒区駒場4-6-1

Fax : 03-5452-6662

E-mail : software@rss21.iis.u-tokyo.ac.jp

# 目 次

|                             |   |
|-----------------------------|---|
| 1. はじめに.....                | 2 |
| 2. 使用方法.....                | 3 |
| 2.1 実行方法 .....              | 3 |
| 2.2 ソルバの設定 .....            | 4 |
| 2.3 入力ファイル .....            | 4 |
| 3. 変換ルールおよび制限 .....         | 5 |
| 3.1 変換対象ニュートラルデータブロック ..... | 5 |
| 3.2 要素タイプの変換規則.....         | 5 |
| 参考文献 .....                  | 7 |

## 1. はじめに

`neu2fstr` は構造解析プログラム `FrontSTR` の入力データである、HEC-MW 単一メッシュファイル、`FrontSTR` コントロールファイルなどを `FEMAP` ニュートラルファイルより生成するデータ変換プログラムである。

`neu2fstr` は `FrontSTR` のオプションのツールとして使用されるが、アーカイブは独立しており、コンパイルにはライブラリ型ミドルウェアである `HEC-MW` を必要としない。使用言語は C++ であり、ISO C++ に遵守するコンパイラであればコンパイル可能なように設計されている。

本マニュアルでは、`neu2fstr` の使用方法などについて説明する。

## 2. 使用方法

### 2.1 実行方法

neu2fstr をパスの通ったディレクトリの置き，コマンドラインで解析の種別，コンバート対象のニュートラルファイル，コンバート後のメッシュファイルなどを指定して実行する．書式は以下の通り．

```
neu2fstr ([options]) [sSeEhH] [neu] [mesh] [ctrl]
```

ただし，

[options] : オプション（複数可，位置は任意）  
[sSeEhH] : 解析種別を表す文字 s, S, e, E, h, H のいずれか  
[neu] : 変換対象のニュートラルファイル  
[mesh] : 変換後の HEC-MW 単一領域メッシュファイル  
[ctrl] : 変換後の FrontSTR コントロールファイル

解析種別の指定の意味は以下の通り．

s 又は S : 弾性静解析  
e 又は E : 固有値解析（ver. 1.00 では無効）  
h 又は H : 熱伝導解析

オプションの意味は以下の通り．

-h : ヘルプ表示（実行はしない）  
-c : HEC-MW 全体制御ファイル hecmw\_ctrl.dat の生成  
-r [name] : hecmw\_ctrl.dat 中に記述する結果ファイル名  
指定しなければ [mesh].res となる．  
-v [name] : hecmw\_ctrl.dat 中に記述する可視化ファイル名  
指定しなければ [mesh].vis となる．  
-d : 直接法ソルバの指定  
指定しなければ CG 法が設定される．

なお，固有値解析用のデータコンバート機能は ver.1.00 ではサポートされていない．固有値解析を行うためには，静解析用にコンバートした後，テキストエディタ等のソフト

を用い **FrontSTR** コントロールファイルの **!SOLUTION** 部の変更および**!EIGEN** の追加等を行うこと。

## 2.2 ソルバの設定

ソルバは、デフォルトでは、CG 法ソルバが選択される。ソルバ条件は **FrontSTR** マニュアルに記述された、デフォルトの値が **FrontSTR** コントロールファイル中に記述される。コマンドラインに **-d** オプションを追加することで、直接法ソルバが選択される。他のソルバを選択したり、ソルバのパラメータを変更する必要がある場合には、生成された **FrontSTR** コントロールファイルの **!SOLVER** ブロックを直接編集する必要がある。

## 2.3 入力ファイル

ニュートラルファイルは、境界条件および荷重条件を幾何形状上に定義することができる。しかしながら、**neu2fstr** には、幾何形状から節点や要素を生成する機能は無いので、このような幾何形状の上に定義された情報は無視される。そこで、ニュートラルファイルを作成する際には、境界条件および荷重条件を節点や要素上に定義しておく必要がある。

### 3. 変換ルールおよび制限

#### 3.1 変換対象ニュートラルデータブロック

変換に使用されるデータブロックを表 3 に示す.

解析セット (822) は使用されないので, 解析種別, ソルバ条件などは別途指定する必要があり, 前章で述べたように `neu2fstr` 実行時のコマンドラインパラメータによって指定するか, 直接生成された `FrontSTR` コントロールファイルの `!SOLVER` ブロックを編集する.

表 3. 変換に使用されるニュートラルデータブロック

| データブロック ID | 意 味  |
|------------|------|
| 100        | ヘッダー |
| 402        | 要素特性 |
| 403        | 節点   |
| 404        | 要素   |
| 506        | 拘束条件 |
| 507        | 荷重   |
| 601        | 材料   |

#### 3.2 要素タイプの変換規則

ニュートラルデータにおける要素タイプ (NEU タイプとする) と HEC-MW における要素タイプの変換規則を表 4 および 5 に示す.

表 4 はソリッド要素の対応表となっている. NEU タイプと HEC-MW タイプは 1 対 1 の関係となっている. これに対し, 表 5 の平面要素については, NEU タイプのみでは, 平面とシェルの識別が出来ない. そこで, 表 6 に示すように, 要素特性のタイプにより, これらを判定する.

平面要素は, さらに, 平面ひずみと平面応力の 2 種類が存在する. これらは, 表 7 に示す, パラメータの値で判定する.

表 4. ソリッド要素変換規則

| NEU タイプ           | HEC-MW タイプ |
|-------------------|------------|
| Wedge6 (五面体 1 次)  | 351        |
| Wedge15 (五面体 2 次) | 352        |
| Brick8 (六面体 1 次)  | 361        |
| Brick20 (六面体 2 次) | 362        |

表 5. 平面およびシェル要素変換規則

| NEU タイプ         | HEC-MW タイプ            |
|-----------------|-----------------------|
| Tri3 (三角形 1 次)  | 231 (平面) or 731 (シェル) |
| Tri6 (三角形 2 次)  | 232 (平面) or 732 (シェル) |
| Quad4 (四角形 1 次) | 241 (平面) or 741 (シェル) |
| Quad8 (四角形 2 次) | 242 (平面) or 742 (シェル) |

表 6. NEU 要素特性と HEC-MW 平面, シェル要素の対応

| NEU 要素特性 | HEC-MW タイプ               |
|----------|--------------------------|
| 平面ひずみ    | 231,232,241 or 242 (平面)  |
| 板        | 731,732,741 or 742 (シェル) |

表 7. 平面ひずみと平面応力の判定規則

| NEU データブロック 404    | HEC-MW 平面要素特性 |
|--------------------|---------------|
| formulation2 = 0   | 平面ひずみ         |
| formulation2 = 256 | 平面応力          |

備考) formulation2 は ver.8.0 からサポート

## 参考文献

- [1] FEMAP Neutral File Format (MSC.visualNastran for Windows 2003 マニュアル)
